# Supplementary material for: Integrated Omics Approach to Unveil Antifungal Bacterial Polyynes as acetyl-CoA Acetyltransferase Inhibitors
Source: Research Square preprint supplement (doi:10.21203/rs.3.rs-1110265/v1), 2021-12-10
Supplement: Supplementary file 1 [file Supplementary Data 3_Bottom up proteome result for polyyne-modification protein.xlsx]

## Sheet: Massilia YMA4 MasL
Checked	Master	Accession	Description	Coverage [%]	# Peptides	# PSMs	# Unique Peptides	# AAs	MW [kDa]	calc. pI	Score Mascot: Mascot	Score Sequest HT: Sequest HT	# Peptides (by Search Engine): Mascot	# Peptides (by Search Engine): Sequest HT	Found in Sample: [S1] F1: Sample	Found in Sample: [S2] F2: Sample	# Protein Groups	Modifications
FALSE	Master Protein	RecPY14His	RecPY14His	94	47	8593	47	406	42.4	7.11	144252	12890.8	43	46	High	High	1
	Checked	Confidence	Annotated Sequence	Modifications	# Protein Groups	# Proteins	# PSMs	Master Protein Accessions	Positions in Proteins	Modifications in Proteins	# Missed Cleavages	Theo. MH+ [Da]	Found in Sample: [S1] F1: Sample	Found in Sample: [S2] F2: Sample	Confidence (by Search Engine): Mascot	Confidence (by Search Engine): Sequest HT	XCorr (by Search Engine): Sequest HT	Ions Score (by Search Engine): Mascot
	FALSE	High	[K].DEANRPDTTEAGLAK.[L]		1	1	664	RecPY14His	RecPY14His [217-231]		0	1587.76	High	High	High	High	4.68	89
		Checked	Confidence	Identifying Node	PSM Ambiguity	Annotated Sequence	Modifications	# Proteins	Master Protein Accessions	Protein Accessions	# Missed Cleavages	Charge	DeltaScore	DeltaCn	Rank	Search Engine Rank	m/z [Da]	MH+ [Da]	Theo. MH+ [Da]	DeltaM [ppm]	Deltam/z [Da]	Activation Type	MS Order	Isolation Interference [%]	Ion Inject Time [ms]	RT [min]	First Scan	Spectrum File	File ID	XCorr	Ions Score	# Protein Groups	Identity Strict	Identity Relaxed	Expectation Value	Precursor Abundance	Apex RT [min]
		FALSE	High	Mascot (A5)	Unambiguous	[K].DEANRPDTTEAGLAK.[L]		1	RecPY14His	RecPY14His	0	2	1	0	1	1	794.383	1587.76	1587.76	-1.07	-0.00085	HCD (High Energy Collision Dissociation)	MS2	23.5725	200	54.9084	16911	PY14_257_109481_P14_A725_20201216_1.raw	F1		22	1	13	13	0.00115611	1.82841e+06	54.67
		FALSE	High	Sequest HT (A3)	Unambiguous	[K].DEANRPDTTEAGLAK.[L]		1	RecPY14His	RecPY14His	0	3	1	0	1	1	529.926	1587.76	1587.76	2	0.00106	HCD (High Energy Collision Dissociation)	MS2	17.3119	99.672	23.3669	5918	PY14_257_109481_P14_A725_20201216_1.raw	F1	3.66		1				362481664	23.13
		FALSE	High	Sequest HT (A3)	Unambiguous	[K].DEANRPDTTEAGLAK.[L]		1	RecPY14His	RecPY14His	0	3	1	0	1	1	529.925	1587.76	1587.76	0.61	0.00032	HCD (High Energy Collision Dissociation)	MS2	1.26756	200	62.5194	18550	PY14_257_109481_P14_A725_20201216_1.raw	F1	2.45		1				119824	62.19
		FALSE	High	Sequest HT (A3)	Unambiguous	[K].DEANRPDTTEAGLAK.[L]		1	RecPY14His	RecPY14His	0	3	1	0	1	1	529.925	1587.76	1587.76	-0.43	-0.00023	HCD (High Energy Collision Dissociation)	MS2	18.6437	9.107	20.9123	4849	PY14_257_109481_P14_A725_20201216_1.raw	F1	2.41		1				1008686912	20.8
		FALSE	Medium	Sequest HT (A3)	Unambiguous	[K].DEANRPDTTEAGLAK.[L]		1	RecPY14His	RecPY14His	0	2	1	0	1	1	794.381	1587.76	1587.76	-3.38	-0.00268	HCD (High Energy Collision Dissociation)	MS2	27.2927	103.15	20.1107	5460	PY14_273_109186_PY14-20_A725-20200724_3.raw	F2	1.89		1
		FALSE	High	Sequest HT (A3)	Unambiguous	[K].DEANRPDTTEAGLAK.[L]		1	RecPY14His	RecPY14His	0	3	1	0	1	1	529.925	1587.76	1587.76	0.27	0.00014	HCD (High Energy Collision Dissociation)	MS2	6.48621	186.41	52.0641	16186	PY14_257_109481_P14_A725_20201216_1.raw	F1	3.13		1				106340992	51.82
		FALSE	Medium	Sequest HT (A3)	Unambiguous	[K].DEANRPDTTEAGLAK.[L]		1	RecPY14His	RecPY14His	0	2	1	0	1	1	794.384	1587.76	1587.76	-0.53	-0.00042	HCD (High Energy Collision Dissociation)	MS2	18.5231	200	47.4967	15117	PY14_257_109481_P14_A725_20201216_1.raw	F1	1.44		1
		FALSE	Medium	Sequest HT (A3)	Selected	[K].DEANRPDTTEAGLAK.[L]		1	RecPY14His	RecPY14His	0	3	1	0	1	1	529.925	1587.76	1587.76	-0.2	-0.0001	HCD (High Energy Collision Dissociation)	MS2	15.0604	38.851	40.625	13039	PY14_257_109481_P14_A725_20201216_1.raw	F1	1.4		1
		FALSE	High	Sequest HT (A3)	Unambiguous	[K].DEANRPDTTEAGLAK.[L]		1	RecPY14His	RecPY14His	0	3	1	0	1	1	529.925	1587.76	1587.76	-0.08	-4e-05	HCD (High Energy Collision Dissociation)	MS2	37.216	89.544	46.2792	14775	PY14_257_109481_P14_A725_20201216_1.raw	F1	2.63		1				39309180	46.32
		FALSE	High	Mascot (A5)	Unambiguous	[K].DEANRPDTTEAGLAK.[L]		1	RecPY14His	RecPY14His	0	2	1	0	1	1	794.383	1587.76	1587.76	-1.38	-0.00109	HCD (High Energy Collision Dissociation)	MS2	0.160474	4.848	15.9173	3133	PY14_257_109481_P14_A725_20201216_1.raw	F1		81	1	13	13	1.49624e-09	174257668096	16.23
		FALSE	Medium	Sequest HT (A3)	Unambiguous	[K].DEANRPDTTEAGLAK.[L]		1	RecPY14His	RecPY14His	0	3	1	0	1	1	529.923	1587.76	1587.76	-3.31	-0.00175	HCD (High Energy Collision Dissociation)	MS2	1.6302	6.315	16.152	3921	PY14_273_109186_PY14-20_A725-20200724_3.raw	F2	1.81		1
		FALSE	High	Sequest HT (A3)	Unambiguous	[K].DEANRPDTTEAGLAK.[L]		1	RecPY14His	RecPY14His	0	2	1	0	1	1	794.381	1587.76	1587.76	-3.45	-0.00274	HCD (High Energy Collision Dissociation)	MS2	0	77.623	16.1539	3922	PY14_273_109186_PY14-20_A725-20200724_3.raw	F2	3.71		1				497934592	16.19
		FALSE	Medium	Sequest HT (A3)	Unambiguous	[K].DEANRPDTTEAGLAK.[L]		1	RecPY14His	RecPY14His	0	3	1	0	1	1	529.925	1587.76	1587.76	-0.43	-0.00023	HCD (High Energy Collision Dissociation)	MS2	0.849479	2.265	15.0647	3529	PY14_273_109186_PY14-20_A725-20200724_3.raw	F2	2.05		1
		FALSE	High	Mascot (A5)	Unambiguous	[K].DEANRPDTTEAGLAK.[L]		1	RecPY14His	RecPY14His	0	3	1	0	1	1	529.925	1587.76	1587.76	-0.43	-0.00023	HCD (High Energy Collision Dissociation)	MS2	44.1624	177.339	30.8422	9253	PY14_257_109481_P14_A725_20201216_1.raw	F1		17	1	13	13	0.0038815	95931512	30.74
		FALSE	High	Sequest HT (A3)	Unambiguous	[K].DEANRPDTTEAGLAK.[L]		1	RecPY14His	RecPY14His	0	3	1	0	1	1	529.925	1587.76	1587.76	0.27	0.00014	HCD (High Energy Collision Dissociation)	MS2	4.75817	200	52.3491	16260	PY14_257_109481_P14_A725_20201216_1.raw	F1	3.4		1				106340992	51.82
		FALSE	Medium	Sequest HT (A3)	Unambiguous	[K].DEANRPDTTEAGLAK.[L]		1	RecPY14His	RecPY14His	0	3	1	0	1	1	529.924	1587.76	1587.76	-1.58	-0.00084	HCD (High Energy Collision Dissociation)	MS2	3.44461	6.187	16.4228	4023	PY14_273_109186_PY14-20_A725-20200724_3.raw	F2	1.83		1
		FALSE	High	Sequest HT (A3)	Unambiguous	[K].DEANRPDTTEAGLAK.[L]		1	RecPY14His	RecPY14His	0	2	1	0	1	1	794.383	1587.76	1587.76	-1.99	-0.00158	HCD (High Energy Collision Dissociation)	MS2	0	94.4	16.4263	4025	PY14_273_109186_PY14-20_A725-20200724_3.raw	F2	2.97		1				497934592	16.19
		FALSE	Medium	Sequest HT (A3)	Unambiguous	[K].DEANRPDTTEAGLAK.[L]		1	RecPY14His	RecPY14His	0	3	1	0	1	1	529.925	1587.76	1587.76	0.15	8e-05	HCD (High Energy Collision Dissociation)	MS2	2.33258	8.037	16.6977	4123	PY14_273_109186_PY14-20_A725-20200724_3.raw	F2	2.27		1
		FALSE	High	Mascot (A5)	Unambiguous	[K].DEANRPDTTEAGLAK.[L]		1	RecPY14His	RecPY14His	0	2	1	0	1	1	794.383	1587.76	1587.76	-1.07	-0.00085	HCD (High Energy Collision Dissociation)	MS2	12.7159	200	53.5904	16585	PY14_257_109481_P14_A725_20201216_1.raw	F1		40	1	13	13	1.90546e-05	22674696	53.58
		FALSE	High	Sequest HT (A3)	Unambiguous	[K].DEANRPDTTEAGLAK.[L]		1	RecPY14His	RecPY14His	0	2	1	0	1	1	794.384	1587.76	1587.76	0	0	HCD (High Energy Collision Dissociation)	MS2	10.1727	81.744	16.7063	4129	PY14_273_109186_PY14-20_A725-20200724_3.raw	F2	2.33		1				497934592	16.19
		FALSE	High	Mascot (A5)	Unambiguous	[K].DEANRPDTTEAGLAK.[L]		1	RecPY14His	RecPY14His	0	2	1	0	1	1	794.384	1587.76	1587.76	-0.38	-0.0003	HCD (High Energy Collision Dissociation)	MS2	5.77333	200	54.1319	16730	PY14_257_109481_P14_A725_20201216_1.raw	F1		42	1	13	13	1.1272e-05	22674696	53.58
		FALSE	Medium	Sequest HT (A3)	Unambiguous	[K].DEANRPDTTEAGLAK.[L]		1	RecPY14His	RecPY14His	0	3	1	0	1	1	529.925	1587.76	1587.76	0.03	2e-05	HCD (High Energy Collision Dissociation)	MS2	5.08479	200	38.9197	12382	PY14_273_109186_PY14-20_A725-20200724_3.raw	F2	1.5		1
		FALSE	High	Mascot (A5)	Unambiguous	[K].DEANRPDTTEAGLAK.[L]		1	RecPY14His	RecPY14His	0	3	1	0	1	1	529.924	1587.76	1587.76	-1.58	-0.00084	HCD (High Energy Collision Dissociation)	MS2	27.0186	200	33.3354	10260	PY14_257_109481_P14_A725_20201216_1.raw	F1		20	1	13	13	0.00205589	77821984	33.45
		FALSE	High	Sequest HT (A3)	Unambiguous	[K].DEANRPDTTEAGLAK.[L]		1	RecPY14His	RecPY14His	0	3	1	0	1	1	529.925	1587.76	1587.76	0.27	0.00014	HCD (High Energy Collision Dissociation)	MS2	3.32149	200	64.5861	18976	PY14_257_109481_P14_A725_20201216_1.raw	F1	2.49		1				152781	64.44
		FALSE	High	Sequest HT (A3)	Unambiguous	[K].DEANRPDTTEAGLAK.[L]		1	RecPY14His	RecPY14His	0	3	1	0	1	1	529.923	1587.76	1587.76	-3.66	-0.00193	HCD (High Energy Collision Dissociation)	MS2	19.647	11.873	21.7072	5187	PY14_257_109481_P14_A725_20201216_1.raw	F1	2.77		1				859509504	21.99
		FALSE	Medium	Sequest HT (A3)	Selected	[K].DEANRPDTTEAGLAK.[L]		1	RecPY14His	RecPY14His	0	3	1	0	1	1	529.925	1587.76	1587.76	0.03	2e-05	HCD (High Energy Collision Dissociation)	MS2	7.30473	200	40.0681	12691	PY14_273_109186_PY14-20_A725-20200724_3.raw	F2	1.46		1
		FALSE	High	Mascot (A5)	Unambiguous	[K].DEANRPDTTEAGLAK.[L]		1	RecPY14His	RecPY14His	0	3	1	0	1	1	529.924	1587.76	1587.76	-1.58	-0.00084	HCD (High Energy Collision Dissociation)	MS2	0	12.129	17.7892	4552	PY14_273_109186_PY14-20_A725-20200724_3.raw	F2		33	1	13	13	0.000100925	1479720064	17.95
		FALSE	High	Sequest HT (A3)	Unambiguous	[K].DEANRPDTTEAGLAK.[L]		1	RecPY14His	RecPY14His	0	2	1	0	1	1	794.391	1587.77	1587.76	8.23	0.00653	HCD (High Energy Collision Dissociation)	MS2	31.4646	172.581	25.5101	6827	PY14_257_109481_P14_A725_20201216_1.raw	F1	4.25		1				68623536	25.44
		FALSE	Medium	Sequest HT (A3)	Selected	[K].DEANRPDTTEAGLAK.[L]		1	RecPY14His	RecPY14His	0	3	1	0	1	1	529.922	1587.75	1587.76	-5.15	-0.00273	HCD (High Energy Collision Dissociation)	MS2	14.1551	29.915	20.4716	5614	PY14_273_109186_PY14-20_A725-20200724_3.raw	F2	1.81		1
		FALSE	High	Mascot (A5)	Unambiguous	[K].DEANRPDTTEAGLAK.[L]		1	RecPY14His	RecPY14His	0	2	1	0	1	1	794.383	1587.76	1587.76	-0.99	-0.00079	HCD (High Energy Collision Dissociation)	MS2	20.4848	200	52.4815	16294	PY14_257_109481_P14_A725_20201216_1.raw	F1		34	1	13	13	7.53356e-05	16252569	51.78
		FALSE	High	Mascot (A5)	Unambiguous	[K].DEANRPDTTEAGLAK.[L]		1	RecPY14His	RecPY14His	0	2	1	0	1	1	794.383	1587.76	1587.76	-1.61	-0.00128	HCD (High Energy Collision Dissociation)	MS2	35.048	83.243	20.1333	4571	PY14_257_109481_P14_A725_20201216_1.raw	F1		80	1	13	13	2.2182e-09	499735328	19.02
		FALSE	High	Mascot (A5)	Unambiguous	[K].DEANRPDTTEAGLAK.[L]		1	RecPY14His	RecPY14His	0	3	1	0	1	1	529.925	1587.76	1587.76	-0.54	-0.00029	HCD (High Energy Collision Dissociation)	MS2	43.695	79.433	28.9486	8433	PY14_257_109481_P14_A725_20201216_1.raw	F1		28	1	13	13	0.000295801	148871136	28.68
		FALSE	Medium	Sequest HT (A3)	Unambiguous	[K].DEANRPDTTEAGLAK.[L]		1	RecPY14His	RecPY14His	0	3	1	0	1	1	529.926	1587.76	1587.76	0.73	0.00038	HCD (High Energy Collision Dissociation)	MS2	3.84405	200	66.9057	19452	PY14_257_109481_P14_A725_20201216_1.raw	F1	1.81		1
		FALSE	High	Sequest HT (A3)	Unambiguous	[K].DEANRPDTTEAGLAK.[L]		1	RecPY14His	RecPY14His	0	2	1	0	1	1	794.386	1587.77	1587.76	2.62	0.00208	HCD (High Energy Collision Dissociation)	MS2	28.8211	56.153	20.8038	4808	PY14_257_109481_P14_A725_20201216_1.raw	F1	3.59		1
		FALSE	Medium	Sequest HT (A3)	Unambiguous	[K].DEANRPDTTEAGLAK.[L]		1	RecPY14His	RecPY14His	0	3	1	0	1	1	529.925	1587.76	1587.76	0.38	0.0002	HCD (High Energy Collision Dissociation)	MS2	3.9788	200	66.3864	19346	PY14_257_109481_P14_A725_20201216_1.raw	F1	1.84		1
		FALSE	High	Mascot (A5)	Unambiguous	[K].DEANRPDTTEAGLAK.[L]		1	RecPY14His	RecPY14His	0	3	1	0	1	1	529.925	1587.76	1587.76	-0.43	-0.00023	HCD (High Energy Collision Dissociation)	MS2	1.1837	6.317	19.4334	4297	PY14_257_109481_P14_A725_20201216_1.raw	F1		44	1	13	13	7.49894e-06	2022556416	19.16
		FALSE	High	Mascot (A5)	Unambiguous	[K].DEANRPDTTEAGLAK.[L]		1	RecPY14His	RecPY14His	0	3	1	0	1	1	529.924	1587.76	1587.76	-1.58	-0.00084	HCD (High Energy Collision Dissociation)	MS2	12.3957	200	38.3806	12281	PY14_257_109481_P14_A725_20201216_1.raw	F1		35	1	13	13	6.56145e-05	25925786	38.33
		FALSE	High	Mascot (A5)	Unambiguous	[K].DEANRPDTTEAGLAK.[L]		1	RecPY14His	RecPY14His	0	3	1	0	1	1	529.925	1587.76	1587.76	-0.2	-0.0001	HCD (High Energy Collision Dissociation)	MS2	0.876536	0.716	14.5082	3338	PY14_273_109186_PY14-20_A725-20200724_3.raw	F2		29	1	13	13	0.000261818	361876586496	13.71
		FALSE	High	Sequest HT (A3)	Unambiguous	[K].DEANRPDTTEAGLAK.[L]		1	RecPY14His	RecPY14His	0	3	1	0	1	1	529.926	1587.76	1587.76	0.73	0.00038	HCD (High Energy Collision Dissociation)	MS2	29.3418	40.796	25.792	6941	PY14_257_109481_P14_A725_20201216_1.raw	F1	3.44		1				167181488	25.69
		FALSE	High	Mascot (A5)	Unambiguous	[K].DEANRPDTTEAGLAK.[L]		1	RecPY14His	RecPY14His	0	2	1	0	1	1	794.384	1587.76	1587.76	-0.53	-0.00042	HCD (High Energy Collision Dissociation)	MS2	0.202313	0.119	13.9309	3133	PY14_273_109186_PY14-20_A725-20200724_3.raw	F2		59	1	13	13	2.67917e-07	125439172608	13.71
		FALSE	Medium	Sequest HT (A3)	Unambiguous	[K].DEANRPDTTEAGLAK.[L]		1	RecPY14His	RecPY14His	0	2	1	0	1	1	794.384	1587.76	1587.76	-0.61	-0.00048	HCD (High Energy Collision Dissociation)	MS2	19.9768	200	52.1199	16200	PY14_257_109481_P14_A725_20201216_1.raw	F1	1.43		1
		FALSE	High	Sequest HT (A3)	Unambiguous	[K].DEANRPDTTEAGLAK.[L]		1	RecPY14His	RecPY14His	0	3	1	0	1	1	529.925	1587.76	1587.76	0.5	0.00026	HCD (High Energy Collision Dissociation)	MS2	4.10249	200	62.7822	18605	PY14_257_109481_P14_A725_20201216_1.raw	F1	2.73		1				372810	62.9
		FALSE	High	Mascot (A5)	Unambiguous	[K].DEANRPDTTEAGLAK.[L]		1	RecPY14His	RecPY14His	0	2	1	0	1	1	794.383	1587.76	1587.76	-1.53	-0.00122	HCD (High Energy Collision Dissociation)	MS2	2.10004	27.881	18.112	3835	PY14_257_109481_P14_A725_20201216_1.raw	F1		71	1	13	13	1.57036e-08	174257668096	16.23
		FALSE	High	Mascot (A5)	Unambiguous	[K].DEANRPDTTEAGLAK.[L]		1	RecPY14His	RecPY14His	0	2	1	0	1	1	794.383	1587.76	1587.76	-1.53	-0.00122	HCD (High Energy Collision Dissociation)	MS2	0	200	13.4081	2946	PY14_273_109186_PY14-20_A725-20200724_3.raw	F2		82	1	13	13	1.3366e-09	125439172608	13.71
		FALSE	High	Mascot (A5)	Unambiguous	[K].DEANRPDTTEAGLAK.[L]		1	RecPY14His	RecPY14His	0	3	1	0	1	1	529.925	1587.76	1587.76	-0.2	-0.0001	HCD (High Energy Collision Dissociation)	MS2	1.78358	3.205	15.3213	3617	PY14_273_109186_PY14-20_A725-20200724_3.raw	F2		48	1	13	13	2.91072e-06	361876586496	13.71
		FALSE	High	Sequest HT (A3)	Unambiguous	[K].DEANRPDTTEAGLAK.[L]		1	RecPY14His	RecPY14His	0	3	1	0	1	1	529.925	1587.76	1587.76	0.61	0.00032	HCD (High Energy Collision Dissociation)	MS2	33.6996	72.003	42.4781	13621	PY14_257_109481_P14_A725_20201216_1.raw	F1	2.77		1				65102584	42.49
		FALSE	Medium	Sequest HT (A3)	Unambiguous	[K].DEANRPDTTEAGLAK.[L]		1	RecPY14His	RecPY14His	0	3	1	0	1	1	529.925	1587.76	1587.76	0.38	0.0002	HCD (High Energy Collision Dissociation)	MS2	4.0011	200	66.1306	19294	PY14_257_109481_P14_A725_20201216_1.raw	F1	2.26		1
		FALSE	High	Mascot (A5)	Unambiguous	[K].DEANRPDTTEAGLAK.[L]		1	RecPY14His	RecPY14His	0	3	1	0	1	1	529.925	1587.76	1587.76	-0.2	-0.0001	HCD (High Energy Collision Dissociation)	MS2	3.3519	200	67.4159	19555	PY14_257_109481_P14_A725_20201216_1.raw	F1		48	1	13	13	3.13329e-06	218086	67.35
		FALSE	High	Mascot (A5)	Unambiguous	[K].DEANRPDTTEAGLAK.[L]		1	RecPY14His	RecPY14His	0	3	1	0	1	1	529.925	1587.76	1587.76	-0.2	-0.0001	HCD (High Energy Collision Dissociation)	MS2	30.9469	112.986	32.2242	10226	PY14_273_109186_PY14-20_A725-20200724_3.raw	F2		35	1	13	13	5.98412e-05
		FALSE	High	Sequest HT (A3)	Unambiguous	[K].DEANRPDTTEAGLAK.[L]		1	RecPY14His	RecPY14His	0	2	1	0	1	1	794.383	1587.76	1587.76	-1.23	-0.00097	HCD (High Energy Collision Dissociation)	MS2	12.609	177.602	24.8142	6533	PY14_257_109481_P14_A725_20201216_1.raw	F1	4.01		1				115430408	24.53
		FALSE	Medium	Sequest HT (A3)	Unambiguous	[K].DEANRPDTTEAGLAK.[L]		1	RecPY14His	RecPY14His	0	3	1	0	1	1	529.925	1587.76	1587.76	-0.77	-0.00041	HCD (High Energy Collision Dissociation)	MS2	1.53252	9.588	16.9667	4221	PY14_273_109186_PY14-20_A725-20200724_3.raw	F2	2.13		1
		FALSE	High	Mascot (A5)	Unambiguous	[K].DEANRPDTTEAGLAK.[L]		1	RecPY14His	RecPY14His	0	3	1	0	1	1	529.925	1587.76	1587.76	-1.12	-0.00059	HCD (High Energy Collision Dissociation)	MS2	1.05497	4.059	18.9087	4108	PY14_257_109481_P14_A725_20201216_1.raw	F1		46	1	13	13	4.52898e-06	2022556416	19.16
		FALSE	High	Mascot (A5)	Unambiguous	[K].DEANRPDTTEAGLAK.[L]		1	RecPY14His	RecPY14His	0	2	1	0	1	1	794.384	1587.76	1587.76	-0.3	-0.00024	HCD (High Energy Collision Dissociation)	MS2	14.2514	186.13	19.7687	5326	PY14_273_109186_PY14-20_A725-20200724_3.raw	F2		67	1	13	13	3.72392e-08
		FALSE	High	Sequest HT (A3)	Unambiguous	[K].DEANRPDTTEAGLAK.[L]		1	RecPY14His	RecPY14His	0	3	1	0	1	1	529.921	1587.75	1587.76	-7.92	-0.00419	HCD (High Energy Collision Dissociation)	MS2	51.1847	59.549	22.4436	5512	PY14_257_109481_P14_A725_20201216_1.raw	F1	2.45		1				859509504	21.99
		FALSE	High	Sequest HT (A3)	Unambiguous	[K].DEANRPDTTEAGLAK.[L]		1	RecPY14His	RecPY14His	0	3	1	0	1	1	529.925	1587.76	1587.76	0.15	8e-05	HCD (High Energy Collision Dissociation)	MS2	37.0966	114.362	46.5531	14852	PY14_257_109481_P14_A725_20201216_1.raw	F1	2.82		1				41931056	46.66
		FALSE	High	Sequest HT (A3)	Unambiguous	[K].DEANRPDTTEAGLAK.[L]		1	RecPY14His	RecPY14His	0	2	1	0	1	1	794.381	1587.75	1587.76	-3.92	-0.00311	HCD (High Energy Collision Dissociation)	MS2	0.220171	2.428	14.749	3420	PY14_273_109186_PY14-20_A725-20200724_3.raw	F2	2.84		1				3062827776	14.74
		FALSE	Medium	Sequest HT (A3)	Unambiguous	[K].DEANRPDTTEAGLAK.[L]		1	RecPY14His	RecPY14His	0	3	1	0	1	1	529.925	1587.76	1587.76	0.38	0.0002	HCD (High Energy Collision Dissociation)	MS2	4.57122	200	63.2907	18711	PY14_257_109481_P14_A725_20201216_1.raw	F1	1.94		1
		FALSE	High	Mascot (A5)	Unambiguous	[K].DEANRPDTTEAGLAK.[L]		1	RecPY14His	RecPY14His	0	3	1	0	1	1	529.925	1587.76	1587.76	-0.31	-0.00016	HCD (High Energy Collision Dissociation)	MS2	0.467755	1.688	17.5198	3646	PY14_257_109481_P14_A725_20201216_1.raw	F1		50	1	13	13	1.86209e-06	387694788608	16.23
		FALSE	Medium	Sequest HT (A3)	Unambiguous	[K].DEANRPDTTEAGLAK.[L]		1	RecPY14His	RecPY14His	0	3	1	0	1	1	529.924	1587.76	1587.76	-1.81	-0.00096	HCD (High Energy Collision Dissociation)	MS2	3.51527	12.332	18.0605	4658	PY14_273_109186_PY14-20_A725-20200724_3.raw	F2	1.96		1
		FALSE	High	Mascot (A5)	Unambiguous	[K].DEANRPDTTEAGLAK.[L]		1	RecPY14His	RecPY14His	0	3	1	0	1	1	529.924	1587.76	1587.76	-1.23	-0.00065	HCD (High Energy Collision Dissociation)	MS2	0.232181	0.571	16.962	3471	PY14_257_109481_P14_A725_20201216_1.raw	F1		45	1	13	13	5.97035e-06	387694788608	16.23
		FALSE	High	Mascot (A5)	Unambiguous	[K].DEANRPDTTEAGLAK.[L]		1	RecPY14His	RecPY14His	0	3	1	0	1	1	529.925	1587.76	1587.76	-0.31	-0.00016	HCD (High Energy Collision Dissociation)	MS2	4.22749	99.241	32.5665	9955	PY14_257_109481_P14_A725_20201216_1.raw	F1		37	1	13	13	3.72392e-05	119074296	32.54
		FALSE	High	Sequest HT (A3)	Unambiguous	[K].DEANRPDTTEAGLAK.[L]		1	RecPY14His	RecPY14His	0	3	1	0	1	1	529.925	1587.76	1587.76	-0.2	-0.0001	HCD (High Energy Collision Dissociation)	MS2	43.8771	87.63	47.1788	15030	PY14_257_109481_P14_A725_20201216_1.raw	F1	2.47		1				35319080	47.23
		FALSE	High	Sequest HT (A3)	Unambiguous	[K].DEANRPDTTEAGLAK.[L]		1	RecPY14His	RecPY14His	0	2	1	0	1	1	794.38	1587.75	1587.76	-5.61	-0.00445	HCD (High Energy Collision Dissociation)	MS2	3.45052	141.677	18.1859	4708	PY14_273_109186_PY14-20_A725-20200724_3.raw	F2	2.12		1				236274032	17.93
		FALSE	High	Mascot (A5)	Unambiguous	[K].DEANRPDTTEAGLAK.[L]		1	RecPY14His	RecPY14His	0	3	1	0	1	1	529.924	1587.76	1587.76	-1.23	-0.00065	HCD (High Energy Collision Dissociation)	MS2	12.1914	139.472	34.3931	10679	PY14_257_109481_P14_A725_20201216_1.raw	F1		22	1	13	13	0.00132739	76851272	34.34
		FALSE	High	Mascot (A5)	Unambiguous	[K].DEANRPDTTEAGLAK.[L]		1	RecPY14His	RecPY14His	0	3	1	0	1	1	529.924	1587.76	1587.76	-1.23	-0.00065	HCD (High Energy Collision Dissociation)	MS2	31.378	124.411	25.8124	7864	PY14_273_109186_PY14-20_A725-20200724_3.raw	F2		28	1	13	13	0.000302691
		FALSE	Medium	Sequest HT (A3)	Unambiguous	[K].DEANRPDTTEAGLAK.[L]		1	RecPY14His	RecPY14His	0	3	1	0	1	1	529.925	1587.76	1587.76	0.38	0.0002	HCD (High Energy Collision Dissociation)	MS2	4.96907	200	38.6324	12304	PY14_273_109186_PY14-20_A725-20200724_3.raw	F2	1.75		1
		FALSE	High	Mascot (A5)	Unambiguous	[K].DEANRPDTTEAGLAK.[L]		1	RecPY14His	RecPY14His	0	2	1	0	1	1	794.383	1587.76	1587.76	-1.3	-0.00103	HCD (High Energy Collision Dissociation)	MS2	0	200	56.4375	17242	PY14_257_109481_P14_A725_20201216_1.raw	F1		27	1	13	13	0.00040738
		FALSE	High	Mascot (A5)	Unambiguous	[K].DEANRPDTTEAGLAK.[L]		1	RecPY14His	RecPY14His	0	2	1	0	1	1	794.383	1587.76	1587.76	-1.38	-0.00109	HCD (High Energy Collision Dissociation)	MS2	0	147.52	25.1519	6673	PY14_257_109481_P14_A725_20201216_1.raw	F1		45	1	13	13	6.0256e-06	57499148	25.11
		FALSE	High	Sequest HT (A3)	Unambiguous	[K].DEANRPDTTEAGLAK.[L]		1	RecPY14His	RecPY14His	0	3	1	0	1	1	529.925	1587.76	1587.76	-0.54	-0.00029	HCD (High Energy Collision Dissociation)	MS2	14.3547	15.745	18.3405	4760	PY14_273_109186_PY14-20_A725-20200724_3.raw	F2	2.3		1				1479720064	17.95
		FALSE	High	Mascot (A5)	Unambiguous	[K].DEANRPDTTEAGLAK.[L]		1	RecPY14His	RecPY14His	0	3	1	0	1	1	529.925	1587.76	1587.76	-0.31	-0.00016	HCD (High Energy Collision Dissociation)	MS2	33.8568	126.87	41.2267	13229	PY14_257_109481_P14_A725_20201216_1.raw	F1		35	1	13	13	5.7544e-05	76918104	41.07
		FALSE	High	Sequest HT (A3)	Unambiguous	[K].DEANRPDTTEAGLAK.[L]		1	RecPY14His	RecPY14His	0	3	1	0	1	1	529.925	1587.76	1587.76	0.61	0.00032	HCD (High Energy Collision Dissociation)	MS2	1.82193	200	65.1015	19082	PY14_257_109481_P14_A725_20201216_1.raw	F1	2.32		1				137909	65.51
		FALSE	High	Sequest HT (A3)	Unambiguous	[K].DEANRPDTTEAGLAK.[L]		1	RecPY14His	RecPY14His	0	3	1	0	1	1	529.925	1587.76	1587.76	0.27	0.00014	HCD (High Energy Collision Dissociation)	MS2	0.669415	200	54.2614	16763	PY14_257_109481_P14_A725_20201216_1.raw	F1	3.18		1				199217904	53.73
		FALSE	High	Mascot (A5)	Unambiguous	[K].DEANRPDTTEAGLAK.[L]		1	RecPY14His	RecPY14His	0	2	1	0	1	1	794.383	1587.76	1587.76	-0.99	-0.00079	HCD (High Energy Collision Dissociation)	MS2	0	1.45	14.2173	3234	PY14_273_109186_PY14-20_A725-20200724_3.raw	F2		65	1	13	13	6.83912e-08	125439172608	13.71
		FALSE	High	Sequest HT (A3)	Unambiguous	[K].DEANRPDTTEAGLAK.[L]		1	RecPY14His	RecPY14His	0	2	1	0	1	1	794.383	1587.76	1587.76	-1.84	-0.00146	HCD (High Energy Collision Dissociation)	MS2	8.37458	66.785	15.8846	3817	PY14_273_109186_PY14-20_A725-20200724_3.raw	F2	2.36		1				497934592	16.19
		FALSE	High	Sequest HT (A3)	Unambiguous	[K].DEANRPDTTEAGLAK.[L]		1	RecPY14His	RecPY14His	0	3	1	0	1	1	529.926	1587.76	1587.76	2.34	0.00124	HCD (High Energy Collision Dissociation)	MS2	68.7947	200	41.5113	13324	PY14_257_109481_P14_A725_20201216_1.raw	F1	3.93		1				76918104	41.07
		FALSE	Medium	Sequest HT (A3)	Unambiguous	[K].DEANRPDTTEAGLAK.[L]		1	RecPY14His	RecPY14His	0	3	1	0	1	1	529.925	1587.76	1587.76	0.27	0.00014	HCD (High Energy Collision Dissociation)	MS2	1.7562	200	63.5513	18765	PY14_257_109481_P14_A725_20201216_1.raw	F1	1.79		1
		FALSE	High	Sequest HT (A3)	Unambiguous	[K].DEANRPDTTEAGLAK.[L]		1	RecPY14His	RecPY14His	0	2	1	0	1	1	794.383	1587.76	1587.76	-1.69	-0.00134	HCD (High Energy Collision Dissociation)	MS2	0	173.637	16.9827	4230	PY14_273_109186_PY14-20_A725-20200724_3.raw	F2	3.69		1				497934592	16.19
		FALSE	High	Sequest HT (A3)	Unambiguous	[K].DEANRPDTTEAGLAK.[L]		1	RecPY14His	RecPY14His	0	2	1	0	1	1	794.378	1587.75	1587.76	-7.68	-0.0061	HCD (High Energy Collision Dissociation)	MS2	50.9426	141.883	22.4152	5495	PY14_257_109481_P14_A725_20201216_1.raw	F1	3.68		1				211709808	21.73
		FALSE	High	Mascot (A5)	Unambiguous	[K].DEANRPDTTEAGLAK.[L]		1	RecPY14His	RecPY14His	0	3	1	0	1	1	529.925	1587.76	1587.76	-0.43	-0.00023	HCD (High Energy Collision Dissociation)	MS2	0	7.779	19.7046	4407	PY14_257_109481_P14_A725_20201216_1.raw	F1		40	1	13	13	1.78649e-05	2022556416	19.16
		FALSE	Medium	Sequest HT (A3)	Selected	[K].DEANRPDTTEAGLAK.[L]		1	RecPY14His	RecPY14His	0	2	1	0	1	1	794.384	1587.76	1587.76	-0.3	-0.00024	HCD (High Energy Collision Dissociation)	MS2	50.1493	200	47.035	14989	PY14_257_109481_P14_A725_20201216_1.raw	F1	1.89		1
		FALSE	Medium	Sequest HT (A3)	Unambiguous	[K].DEANRPDTTEAGLAK.[L]		1	RecPY14His	RecPY14His	0	2	1	0	1	1	794.385	1587.76	1587.76	0.77	0.00061	HCD (High Energy Collision Dissociation)	MS2	19.4222	200	54.3903	16791	PY14_257_109481_P14_A725_20201216_1.raw	F1	1.06		1
		FALSE	Medium	Sequest HT (A3)	Unambiguous	[K].DEANRPDTTEAGLAK.[L]		1	RecPY14His	RecPY14His	0	3	1	0	1	1	529.925	1587.76	1587.76	0.38	0.0002	HCD (High Energy Collision Dissociation)	MS2	10.6067	200	40.3459	12765	PY14_273_109186_PY14-20_A725-20200724_3.raw	F2	1.72		1
		FALSE	High	Mascot (A5)	Unambiguous	[K].DEANRPDTTEAGLAK.[L]		1	RecPY14His	RecPY14His	0	3	1	0	1	1	529.925	1587.76	1587.76	-0.43	-0.00023	HCD (High Energy Collision Dissociation)	MS2	47.8397	61.413	46.0113	14700	PY14_257_109481_P14_A725_20201216_1.raw	F1		16	1	13	13	0.005236	39309180	46.32
		FALSE	High	Sequest HT (A3)	Unambiguous	[K].DEANRPDTTEAGLAK.[L]		1	RecPY14His	RecPY14His	0	3	1	0	1	1	529.925	1587.76	1587.76	0.03	2e-05	HCD (High Energy Collision Dissociation)	MS2	35.6501	84.579	41.7854	13411	PY14_257_109481_P14_A725_20201216_1.raw	F1	3.04		1				44881244	41.67
		FALSE	High	Sequest HT (A3)	Unambiguous	[K].DEANRPDTTEAGLAK.[L]		1	RecPY14His	RecPY14His	0	3	1	0	1	1	529.925	1587.76	1587.76	-0.2	-0.0001	HCD (High Energy Collision Dissociation)	MS2	1.78358	3.205	15.3213	3617	PY14_273_109186_PY14-20_A725-20200724_3.raw	F2	2.44		1				361876586496	13.71
		FALSE	Medium	Sequest HT (A3)	Unambiguous	[K].DEANRPDTTEAGLAK.[L]		1	RecPY14His	RecPY14His	0	3	1	0	1	1	529.925	1587.76	1587.76	0.38	0.0002	HCD (High Energy Collision Dissociation)	MS2	2.81991	200	64.0709	18871	PY14_257_109481_P14_A725_20201216_1.raw	F1	2.27		1
		FALSE	High	Sequest HT (A3)	Unambiguous	[K].DEANRPDTTEAGLAK.[L]		1	RecPY14His	RecPY14His	0	3	1	0	1	1	529.925	1587.76	1587.76	-0.2	-0.0001	HCD (High Energy Collision Dissociation)	MS2	35.3623	120.44	46.9064	14955	PY14_257_109481_P14_A725_20201216_1.raw	F1	2.43		1				41931056	46.66
		FALSE	High	Mascot (A5)	Unambiguous	[K].DEANRPDTTEAGLAK.[L]		1	RecPY14His	RecPY14His	0	3	1	0	1	1	529.925	1587.76	1587.76	-0.43	-0.00023	HCD (High Energy Collision Dissociation)	MS2	16.1719	186.424	31.5292	9992	PY14_273_109186_PY14-20_A725-20200724_3.raw	F2		30	1	13	13	0.000189234	114802552	30.91
		FALSE	Medium	Sequest HT (A3)	Unambiguous	[K].DEANRPDTTEAGLAK.[L]		1	RecPY14His	RecPY14His	0	3	1	0	1	1	529.925	1587.76	1587.76	-0.2	-0.0001	HCD (High Energy Collision Dissociation)	MS2	2.62959	4.871	15.5993	3716	PY14_273_109186_PY14-20_A725-20200724_3.raw	F2	1.87		1
		FALSE	High	Sequest HT (A3)	Unambiguous	[K].DEANRPDTTEAGLAK.[L]		1	RecPY14His	RecPY14His	0	2	1	0	1	1	794.384	1587.76	1587.76	-0.69	-0.00055	HCD (High Energy Collision Dissociation)	MS2	24.6438	45.388	15.6044	3720	PY14_273_109186_PY14-20_A725-20200724_3.raw	F2	2.9		1				497934592	16.19
		FALSE	Medium	Sequest HT (A3)	Unambiguous	[K].DEANRPDTTEAGLAK.[L]		1	RecPY14His	RecPY14His	0	2	1	0	1	1	794.383	1587.76	1587.76	-1.69	-0.00134	HCD (High Energy Collision Dissociation)	MS2	28.7361	200	46.5875	14862	PY14_257_109481_P14_A725_20201216_1.raw	F1	1.58		1
		FALSE	High	Sequest HT (A3)	Unambiguous	[K].DEANRPDTTEAGLAK.[L]		1	RecPY14His	RecPY14His	0	3	1	0	1	1	529.925	1587.76	1587.76	0.5	0.00026	HCD (High Energy Collision Dissociation)	MS2	4.61522	200	64.3292	18924	PY14_257_109481_P14_A725_20201216_1.raw	F1	2.69		1				194058	63.94
		FALSE	High	Mascot (A5)	Unambiguous	[K].DEANRPDTTEAGLAK.[L]		1	RecPY14His	RecPY14His	0	2	1	0	1	1	794.383	1587.76	1587.76	-1.07	-0.00085	HCD (High Energy Collision Dissociation)	MS2	0.600013	26.375	17.8401	3746	PY14_257_109481_P14_A725_20201216_1.raw	F1		78	1	13	13	3.46737e-09	174257668096	16.23
		FALSE	High	Mascot (A5)	Unambiguous	[K].DEANRPDTTEAGLAK.[L]		1	RecPY14His	RecPY14His	0	3	1	0	1	1	529.925	1587.76	1587.76	-0.43	-0.00023	HCD (High Energy Collision Dissociation)	MS2	38.5916	63.031	43.899	14061	PY14_257_109481_P14_A725_20201216_1.raw	F1		28	1	13	13	0.00034435	43645408	44.04
		FALSE	Medium	Sequest HT (A3)	Unambiguous	[K].DEANRPDTTEAGLAK.[L]		1	RecPY14His	RecPY14His	0	3	1	0	1	1	529.925	1587.76	1587.76	-0.77	-0.00041	HCD (High Energy Collision Dissociation)	MS2	3.15142	5.872	15.8829	3816	PY14_273_109186_PY14-20_A725-20200724_3.raw	F2	1.57		1
		FALSE	High	Mascot (A5)	Unambiguous	[K].DEANRPDTTEAGLAK.[L]		1	RecPY14His	RecPY14His	0	3	1	0	1	1	529.924	1587.76	1587.76	-1.58	-0.00084	HCD (High Energy Collision Dissociation)	MS2	3.44461	6.187	16.4228	4023	PY14_273_109186_PY14-20_A725-20200724_3.raw	F2		28	1	13	13	0.000337287
		FALSE	High	Sequest HT (A3)	Unambiguous	[K].DEANRPDTTEAGLAK.[L]		1	RecPY14His	RecPY14His	0	3	1	0	1	1	529.927	1587.77	1587.76	4.07	0.00215	HCD (High Energy Collision Dissociation)	MS2	0.243816	0.166	14.23	3240	PY14_273_109186_PY14-20_A725-20200724_3.raw	F2	2.45		1				361876586496	13.71
		FALSE	High	Sequest HT (A3)	Unambiguous	[K].DEANRPDTTEAGLAK.[L]		1	RecPY14His	RecPY14His	0	3	1	0	1	1	529.925	1587.76	1587.76	0.27	0.00014	HCD (High Energy Collision Dissociation)	MS2	0	200	66.642	19398	PY14_257_109481_P14_A725_20201216_1.raw	F1	2.52		1				395281	66.66
		FALSE	Medium	Sequest HT (A3)	Selected	[K].DEANRPDTTEAGLAK.[L]		1	RecPY14His	RecPY14His	0	3	1	0	1	1	529.925	1587.76	1587.76	0.15	8e-05	HCD (High Energy Collision Dissociation)	MS2	11.6149	200	47.6597	14690	PY14_273_109186_PY14-20_A725-20200724_3.raw	F2	1.38		1
		FALSE	High	Mascot (A5)	Unambiguous	[K].DEANRPDTTEAGLAK.[L]		1	RecPY14His	RecPY14His	0	2	1	0	1	1	794.385	1587.76	1587.76	0.54	0.00043	HCD (High Energy Collision Dissociation)	MS2	0.289914	0.789	16.7211	3393	PY14_257_109481_P14_A725_20201216_1.raw	F1		69	1	13	13	2.32274e-08	174257668096	16.23
		FALSE	High	Mascot (A5)	Unambiguous	[K].DEANRPDTTEAGLAK.[L]		1	RecPY14His	RecPY14His	0	3	1	0	1	1	529.925	1587.76	1587.76	0.27	0.00014	HCD (High Energy Collision Dissociation)	MS2	4.2953	200	57.9662	17091	PY14_273_109186_PY14-20_A725-20200724_3.raw	F2		16	1	13	13	0.00512861	606141	58.09
		FALSE	High	Mascot (A5)	Unambiguous	[K].DEANRPDTTEAGLAK.[L]		1	RecPY14His	RecPY14His	0	3	1	0	1	1	529.925	1587.76	1587.76	0.5	0.00026	HCD (High Energy Collision Dissociation)	MS2	1.51554	8.221	15.656	3055	PY14_257_109481_P14_A725_20201216_1.raw	F1		43	1	13	13	9.59401e-06	387694788608	16.23
		FALSE	Medium	Sequest HT (A3)	Unambiguous	[K].DEANRPDTTEAGLAK.[L]		1	RecPY14His	RecPY14His	0	2	1	0	1	1	794.383	1587.76	1587.76	-1.3	-0.00103	HCD (High Energy Collision Dissociation)	MS2	0	200	56.4375	17242	PY14_257_109481_P14_A725_20201216_1.raw	F1	0.94		1
		FALSE	High	Mascot (A5)	Unambiguous	[K].DEANRPDTTEAGLAK.[L]		1	RecPY14His	RecPY14His	0	3	1	0	1	1	529.925	1587.76	1587.76	0.5	0.00026	HCD (High Energy Collision Dissociation)	MS2	36.4491	94.403	51.7651	16106	PY14_257_109481_P14_A725_20201216_1.raw	F1		44	1	13	13	7.55092e-06	106340992	51.82
		FALSE	High	Mascot (A5)	Unambiguous	[K].DEANRPDTTEAGLAK.[L]		1	RecPY14His	RecPY14His	0	3	1	0	1	1	529.925	1587.76	1587.76	0.5	0.00026	HCD (High Energy Collision Dissociation)	MS2	0.408701	2.327	17.8073	3734	PY14_257_109481_P14_A725_20201216_1.raw	F1		42	1	13	13	1.30317e-05	387694788608	16.23
		FALSE	High	Mascot (A5)	Unambiguous	[K].DEANRPDTTEAGLAK.[L]		1	RecPY14His	RecPY14His	0	3	1	0	1	1	529.925	1587.76	1587.76	0.5	0.00026	HCD (High Energy Collision Dissociation)	MS2	28.5549	200	33.2673	10590	PY14_273_109186_PY14-20_A725-20200724_3.raw	F2		31	1	13	13	0.000146555
		FALSE	Medium	Sequest HT (A3)	Unambiguous	[K].DEANRPDTTEAGLAK.[L]		1	RecPY14His	RecPY14His	0	3	1	0	1	1	529.926	1587.76	1587.76	0.73	0.00038	HCD (High Energy Collision Dissociation)	MS2	0	200	43.843	13698	PY14_273_109186_PY14-20_A725-20200724_3.raw	F2	1.95		1
		FALSE	Medium	Sequest HT (A3)	Selected	[K].DEANRPDTTEAGLAK.[L]		1	RecPY14His	RecPY14His	0	3	1	0	1	1	529.925	1587.76	1587.76	0.03	2e-05	HCD (High Energy Collision Dissociation)	MS2	27.3889	200	47.3905	14621	PY14_273_109186_PY14-20_A725-20200724_3.raw	F2	1.22		1
		FALSE	High	Mascot (A5)	Unambiguous	[K].DEANRPDTTEAGLAK.[L]		1	RecPY14His	RecPY14His	0	3	1	0	1	1	529.925	1587.76	1587.76	0.5	0.00026	HCD (High Energy Collision Dissociation)	MS2	0.719217	200	57.3402	17443	PY14_257_109481_P14_A725_20201216_1.raw	F1		40	1	13	13	2.14783e-05	1.86378e+06	57.44
		FALSE	High	Mascot (A5)	Unambiguous	[K].DEANRPDTTEAGLAK.[L]		1	RecPY14His	RecPY14His	0	3	1	0	1	1	529.925	1587.76	1587.76	0.27	0.00014	HCD (High Energy Collision Dissociation)	MS2	11.4464	200	45.7616	14197	PY14_273_109186_PY14-20_A725-20200724_3.raw	F2		26	1	13	13	0.000480839	4469878	45.89
		FALSE	High	Mascot (A5)	Unambiguous	[K].DEANRPDTTEAGLAK.[L]		1	RecPY14His	RecPY14His	0	3	1	0	1	1	529.925	1587.76	1587.76	0.5	0.00026	HCD (High Energy Collision Dissociation)	MS2	18.9102	188.553	31.8083	10082	PY14_273_109186_PY14-20_A725-20200724_3.raw	F2		38	1	13	13	3.04789e-05
		FALSE	High	Mascot (A5)	Unambiguous	[K].DEANRPDTTEAGLAK.[L]		1	RecPY14His	RecPY14His	0	3	1	0	1	1	529.925	1587.76	1587.76	0.27	0.00014	HCD (High Energy Collision Dissociation)	MS2	3.04007	200	55.9226	16661	PY14_273_109186_PY14-20_A725-20200724_3.raw	F2		26	1	13	13	0.000472063	4253940	55.98
		FALSE	High	Mascot (A5)	Unambiguous	[K].DEANRPDTTEAGLAK.[L]		1	RecPY14His	RecPY14His	0	3	1	0	1	1	529.925	1587.76	1587.76	0.27	0.00014	HCD (High Energy Collision Dissociation)	MS2	17.8537	200	46.0316	14267	PY14_273_109186_PY14-20_A725-20200724_3.raw	F2		16	1	13	13	0.00447713	10105594	46.13
		FALSE	High	Mascot (A5)	Unambiguous	[K].DEANRPDTTEAGLAK.[L]		1	RecPY14His	RecPY14His	0	3	1	0	1	1	529.925	1587.76	1587.76	0.5	0.00026	HCD (High Energy Collision Dissociation)	MS2	4.10249	200	62.7822	18605	PY14_257_109481_P14_A725_20201216_1.raw	F1		41	1	13	13	1.47231e-05	372810	62.9
		FALSE	High	Mascot (A5)	Unambiguous	[K].DEANRPDTTEAGLAK.[L]		1	RecPY14His	RecPY14His	0	3	1	0	1	1	529.925	1587.76	1587.76	0.61	0.00032	HCD (High Energy Collision Dissociation)	MS2	12.5127	200	35.5563	11337	PY14_273_109186_PY14-20_A725-20200724_3.raw	F2		26	1	13	13	0.000484172	65576612	35.22
		FALSE	High	Sequest HT (A3)	Unambiguous	[K].DEANRPDTTEAGLAK.[L]		1	RecPY14His	RecPY14His	0	3	1	0	1	1	529.925	1587.76	1587.76	-0.08	-4e-05	HCD (High Energy Collision Dissociation)	MS2	3.29422	200	38.0504	12143	PY14_273_109186_PY14-20_A725-20200724_3.raw	F2	2.37		1				28984758	37.91
		FALSE	Medium	Sequest HT (A3)	Unambiguous	[K].DEANRPDTTEAGLAK.[L]		1	RecPY14His	RecPY14His	0	3	1	0	1	1	529.925	1587.76	1587.76	0.27	0.00014	HCD (High Energy Collision Dissociation)	MS2	12.0348	200	38.3474	12227	PY14_273_109186_PY14-20_A725-20200724_3.raw	F2	2.08		1
		FALSE	High	Mascot (A5)	Unambiguous	[K].DEANRPDTTEAGLAK.[L]		1	RecPY14His	RecPY14His	0	4	1	0	1	1	397.696	1587.76	1587.76	0.6	0.00024	HCD (High Energy Collision Dissociation)	MS2	8.66676	115.254	13.6062	3019	PY14_273_109186_PY14-20_A725-20200724_3.raw	F2		34	1	13	13	7.85236e-05	84991704	13.71
		FALSE	High	Mascot (A5)	Unambiguous	[K].DEANRPDTTEAGLAK.[L]		1	RecPY14His	RecPY14His	0	3	1	0	1	1	529.924	1587.76	1587.76	-1.46	-0.00077	HCD (High Energy Collision Dissociation)	MS2	12.4747	180.315	38.9433	12484	PY14_257_109481_P14_A725_20201216_1.raw	F1		30	1	13	13	0.00020797	26571876	38.96
		FALSE	High	Mascot (A5)	Unambiguous	[K].DEANRPDTTEAGLAK.[L]		1	RecPY14His	RecPY14His	0	3	1	0	1	1	529.925	1587.76	1587.76	0.5	0.00026	HCD (High Energy Collision Dissociation)	MS2	4.61522	200	64.3292	18924	PY14_257_109481_P14_A725_20201216_1.raw	F1		42	1	13	13	1.27057e-05	194058	63.94
		FALSE	High	Mascot (A5)	Unambiguous	[K].DEANRPDTTEAGLAK.[L]		1	RecPY14His	RecPY14His	0	3	1	0	1	1	529.921	1587.75	1587.76	-7.92	-0.00419	HCD (High Energy Collision Dissociation)	MS2	51.1847	59.549	22.4436	5512	PY14_257_109481_P14_A725_20201216_1.raw	F1		14	1	13	13	0.00879023	859509504	21.99
		FALSE	High	Mascot (A5)	Unambiguous	[K].DEANRPDTTEAGLAK.[L]		1	RecPY14His	RecPY14His	0	3	1	0	1	1	529.925	1587.76	1587.76	0.5	0.00026	HCD (High Energy Collision Dissociation)	MS2	1.39492	200	67.9316	19659	PY14_257_109481_P14_A725_20201216_1.raw	F1		35	1	13	13	6.18016e-05	74883.3	68.06
		FALSE	Medium	Sequest HT (A3)	Unambiguous	[K].DEANRPDTTEAGLAK.[L]		1	RecPY14His	RecPY14His	0	3	1	0	1	1	529.925	1587.76	1587.76	0.15	8e-05	HCD (High Energy Collision Dissociation)	MS2	14.0095	200	46.8512	14479	PY14_273_109186_PY14-20_A725-20200724_3.raw	F2	1.36		1
		FALSE	Medium	Sequest HT (A3)	Unambiguous	[K].DEANRPDTTEAGLAK.[L]		1	RecPY14His	RecPY14His	0	3	1	0	1	1	529.926	1587.76	1587.76	0.84	0.00045	HCD (High Energy Collision Dissociation)	MS2	10.731	182.981	30.9025	9785	PY14_273_109186_PY14-20_A725-20200724_3.raw	F2	1.93		1
		FALSE	High	Mascot (A5)	Unambiguous	[K].DEANRPDTTEAGLAK.[L]		1	RecPY14His	RecPY14His	0	2	1	0	1	1	794.378	1587.75	1587.76	-7.68	-0.0061	HCD (High Energy Collision Dissociation)	MS2	50.9426	141.883	22.4152	5495	PY14_257_109481_P14_A725_20201216_1.raw	F1		30	1	13	13	0.000210378	211709808	21.73
		FALSE	High	Mascot (A5)	Unambiguous	[K].DEANRPDTTEAGLAK.[L]		1	RecPY14His	RecPY14His	0	3	1	0	1	1	529.925	1587.76	1587.76	0.27	0.00014	HCD (High Energy Collision Dissociation)	MS2	1.59034	200	68.1899	19712	PY14_257_109481_P14_A725_20201216_1.raw	F1		37	1	13	13	3.97192e-05	268299	68.19
		FALSE	High	Mascot (A5)	Unambiguous	[K].DEANRPDTTEAGLAK.[L]		1	RecPY14His	RecPY14His	0	3	1	0	1	1	529.925	1587.76	1587.76	0.27	0.00014	HCD (High Energy Collision Dissociation)	MS2	12.0348	200	38.3474	12227	PY14_273_109186_PY14-20_A725-20200724_3.raw	F2		27	1	13	13	0.000366438	40645516	38.46
		FALSE	High	Mascot (A5)	Unambiguous	[K].DEANRPDTTEAGLAK.[L]		1	RecPY14His	RecPY14His	0	3	1	0	1	1	529.925	1587.76	1587.76	0.5	0.00026	HCD (High Energy Collision Dissociation)	MS2	9.90587	200	41.8244	13163	PY14_273_109186_PY14-20_A725-20200724_3.raw	F2		34	1	13	13	8.6896e-05	28510050	41.93
		FALSE	High	Mascot (A5)	Unambiguous	[K].DEANRPDTTEAGLAK.[L]		1	RecPY14His	RecPY14His	0	3	1	0	1	1	529.925	1587.76	1587.76	0.5	0.00026	HCD (High Energy Collision Dissociation)	MS2	2.03442	200	68.4454	19763	PY14_257_109481_P14_A725_20201216_1.raw	F1		36	1	13	13	4.69894e-05	80266.1	68.41
		FALSE	High	Sequest HT (A3)	Unambiguous	[K].DEANRPDTTEAGLAK.[L]		1	RecPY14His	RecPY14His	0	3	1	0	1	1	529.925	1587.76	1587.76	-0.43	-0.00023	HCD (High Energy Collision Dissociation)	MS2	38.5916	63.031	43.899	14061	PY14_257_109481_P14_A725_20201216_1.raw	F1	2.58		1				43645408	44.04
		FALSE	High	Mascot (A5)	Unambiguous	[K].DEANRPDTTEAGLAK.[L]		1	RecPY14His	RecPY14His	0	3	1	0	1	1	529.925	1587.76	1587.76	0.27	0.00014	HCD (High Energy Collision Dissociation)	MS2	3.33082	200	62.26	18496	PY14_257_109481_P14_A725_20201216_1.raw	F1		43	1	13	13	1.09901e-05	277517	62.35
		FALSE	High	Mascot (A5)	Unambiguous	[K].DEANRPDTTEAGLAK.[L]		1	RecPY14His	RecPY14His	0	3	1	0	1	1	529.925	1587.76	1587.76	0.5	0.00026	HCD (High Energy Collision Dissociation)	MS2	0	200	67.6732	19608	PY14_257_109481_P14_A725_20201216_1.raw	F1		39	1	13	13	2.46037e-05	199122	67.6
		FALSE	Medium	Sequest HT (A3)	Unambiguous	[K].DEANRPDTTEAGLAK.[L]		1	RecPY14His	RecPY14His	0	3	1	0	1	1	529.925	1587.76	1587.76	0.38	0.0002	HCD (High Energy Collision Dissociation)	MS2	9.87302	170.322	34.3515	10963	PY14_273_109186_PY14-20_A725-20200724_3.raw	F2	1.28		1
		FALSE	High	Mascot (A5)	Unambiguous	[K].DEANRPDTTEAGLAK.[L]		1	RecPY14His	RecPY14His	0	3	1	0	1	1	529.925	1587.76	1587.76	0.5	0.00026	HCD (High Energy Collision Dissociation)	MS2	2.23576	200	64.843	19029	PY14_257_109481_P14_A725_20201216_1.raw	F1		33	1	13	13	0.000109396	152781	64.44
		FALSE	High	Mascot (A5)	Unambiguous	[K].DEANRPDTTEAGLAK.[L]		1	RecPY14His	RecPY14His	0	3	1	0	1	1	529.925	1587.76	1587.76	0.5	0.00026	HCD (High Energy Collision Dissociation)	MS2	6.27683	200	33.5553	10688	PY14_273_109186_PY14-20_A725-20200724_3.raw	F2		35	1	13	13	6.77642e-05
		FALSE	High	Mascot (A5)	Unambiguous	[K].DEANRPDTTEAGLAK.[L]		1	RecPY14His	RecPY14His	0	3	1	0	1	1	529.925	1587.76	1587.76	0.61	0.00032	HCD (High Energy Collision Dissociation)	MS2	2.45962	200	65.6191	19188	PY14_257_109481_P14_A725_20201216_1.raw	F1		28	1	13	13	0.000300608	155198	65.71
		FALSE	High	Mascot (A5)	Unambiguous	[K].DEANRPDTTEAGLAK.[L]		1	RecPY14His	RecPY14His	0	3	1	0	1	1	529.925	1587.76	1587.76	0.61	0.00032	HCD (High Energy Collision Dissociation)	MS2	0	200	68.9608	19867	PY14_257_109481_P14_A725_20201216_1.raw	F1		41	1	13	13	1.77419e-05	411448	69.19
		FALSE	Medium	Sequest HT (A3)	Unambiguous	[K].DEANRPDTTEAGLAK.[L]		1	RecPY14His	RecPY14His	0	3	1	0	1	1	529.926	1587.76	1587.76	0.73	0.00038	HCD (High Energy Collision Dissociation)	MS2	11.313	143.318	30.0336	9480	PY14_273_109186_PY14-20_A725-20200724_3.raw	F2	2.1		1
		FALSE	Medium	Sequest HT (A3)	Selected	[K].DEANRPDTTEAGLAK.[L]		1	RecPY14His	RecPY14His	0	3	1	0	1	1	529.924	1587.76	1587.76	-2.27	-0.0012	HCD (High Energy Collision Dissociation)	MS2	27.6761	12.048	19.2486	5136	PY14_273_109186_PY14-20_A725-20200724_3.raw	F2	1.8		1
		FALSE	High	Sequest HT (A3)	Unambiguous	[K].DEANRPDTTEAGLAK.[L]		1	RecPY14His	RecPY14His	0	3	1	0	1	1	529.923	1587.76	1587.76	-3.66	-0.00193	HCD (High Energy Collision Dissociation)	MS2	0	54.57	23.0804	5799	PY14_257_109481_P14_A725_20201216_1.raw	F1	3.43		1				362481664	23.13
		FALSE	High	Mascot (A5)	Unambiguous	[K].DEANRPDTTEAGLAK.[L]		1	RecPY14His	RecPY14His	0	2	1	0	1	1	794.383	1587.76	1587.76	-1.46	-0.00116	HCD (High Energy Collision Dissociation)	MS2	0	19.732	15.0335	3518	PY14_273_109186_PY14-20_A725-20200724_3.raw	F2		51	1	13	13	1.4388e-06	3062827776	14.74
		FALSE	High	Mascot (A5)	Unambiguous	[K].DEANRPDTTEAGLAK.[L]		1	RecPY14His	RecPY14His	0	2	1	0	1	1	794.383	1587.76	1587.76	-1.38	-0.00109	HCD (High Energy Collision Dissociation)	MS2	0	45.558	19.2322	4220	PY14_257_109481_P14_A725_20201216_1.raw	F1		84	1	13	13	8.4918e-10	499735328	19.02
		FALSE	High	Sequest HT (A3)	Unambiguous	[K].DEANRPDTTEAGLAK.[L]		1	RecPY14His	RecPY14His	0	3	1	0	1	1	529.924	1587.76	1587.76	-1.69	-0.0009	HCD (High Energy Collision Dissociation)	MS2	9.59897	11.119	21.1707	4960	PY14_257_109481_P14_A725_20201216_1.raw	F1	2.94		1				1008686912	20.8
		FALSE	Medium	Sequest HT (A3)	Unambiguous	[K].DEANRPDTTEAGLAK.[L]		1	RecPY14His	RecPY14His	0	3	1	0	1	1	529.925	1587.76	1587.76	0.03	2e-05	HCD (High Energy Collision Dissociation)	MS2	3.50213	200	65.3604	19134	PY14_257_109481_P14_A725_20201216_1.raw	F1	1.64		1
		FALSE	High	Mascot (A5)	Unambiguous	[K].DEANRPDTTEAGLAK.[L]		1	RecPY14His	RecPY14His	0	2	1	0	1	1	794.383	1587.76	1587.76	-1.38	-0.00109	HCD (High Energy Collision Dissociation)	MS2	28.8651	200	52.7517	16364	PY14_257_109481_P14_A725_20201216_1.raw	F1		15	1	13	13	0.00683912	22674696	53.58
		FALSE	Medium	Sequest HT (A3)	Unambiguous	[K].DEANRPDTTEAGLAK.[L]		1	RecPY14His	RecPY14His	0	3	1	0	1	1	529.925	1587.76	1587.76	-0.2	-0.0001	HCD (High Energy Collision Dissociation)	MS2	0.876536	0.716	14.5082	3338	PY14_273_109186_PY14-20_A725-20200724_3.raw	F2	1.71		1
		FALSE	High	Sequest HT (A3)	Unambiguous	[K].DEANRPDTTEAGLAK.[L]		1	RecPY14His	RecPY14His	0	2	1	0	1	1	794.382	1587.76	1587.76	-2.22	-0.00177	HCD (High Energy Collision Dissociation)	MS2	0.316636	7.817	14.4812	3327	PY14_273_109186_PY14-20_A725-20200724_3.raw	F2	2.71		1				3062827776	14.74
		FALSE	Medium	Sequest HT (A3)	Unambiguous	[K].DEANRPDTTEAGLAK.[L]		1	RecPY14His	RecPY14His	0	3	1	0	1	1	529.925	1587.76	1587.76	0.61	0.00032	HCD (High Energy Collision Dissociation)	MS2	2.45962	200	65.6191	19188	PY14_257_109481_P14_A725_20201216_1.raw	F1	2.11		1
		FALSE	High	Sequest HT (A3)	Unambiguous	[K].DEANRPDTTEAGLAK.[L]		1	RecPY14His	RecPY14His	0	3	1	0	1	1	529.925	1587.76	1587.76	0.38	0.0002	HCD (High Energy Collision Dissociation)	MS2	2.66227	200	63.0351	18657	PY14_257_109481_P14_A725_20201216_1.raw	F1	2.5		1				372810	62.9
		FALSE	High	Sequest HT (A3)	Unambiguous	[K].DEANRPDTTEAGLAK.[L]		1	RecPY14His	RecPY14His	0	2	1	0	1	1	794.384	1587.76	1587.76	-0.3	-0.00024	HCD (High Energy Collision Dissociation)	MS2	43.2361	87.864	19.1684	5101	PY14_273_109186_PY14-20_A725-20200724_3.raw	F2	2.34		1
		FALSE	High	Sequest HT (A3)	Unambiguous	[K].DEANRPDTTEAGLAK.[L]		1	RecPY14His	RecPY14His	0	3	1	0	1	1	529.925	1587.76	1587.76	0.15	8e-05	HCD (High Energy Collision Dissociation)	MS2	3.34347	200	65.8743	19241	PY14_257_109481_P14_A725_20201216_1.raw	F1	2.45		1				155198	65.71
		FALSE	Medium	Sequest HT (A3)	Unambiguous	[K].DEANRPDTTEAGLAK.[L]		1	RecPY14His	RecPY14His	0	3	1	0	1	1	529.925	1587.76	1587.76	-0.89	-0.00047	HCD (High Energy Collision Dissociation)	MS2	15.7948	200	40.6527	12848	PY14_273_109186_PY14-20_A725-20200724_3.raw	F2	1.58		1
		FALSE	High	Mascot (A5)	Unambiguous	[K].DEANRPDTTEAGLAK.[L]		1	RecPY14His	RecPY14His	0	3	1	0	1	1	529.925	1587.76	1587.76	-0.2	-0.0001	HCD (High Energy Collision Dissociation)	MS2	9.98442	200	40.9515	12931	PY14_273_109186_PY14-20_A725-20200724_3.raw	F2		23	1	13	13	0.000946237	39172232	41.01
		FALSE	High	Sequest HT (A3)	Unambiguous	[K].DEANRPDTTEAGLAK.[L]		1	RecPY14His	RecPY14His	0	2	1	0	1	1	794.384	1587.76	1587.76	-0.3	-0.00024	HCD (High Energy Collision Dissociation)	MS2	14.2514	186.13	19.7687	5326	PY14_273_109186_PY14-20_A725-20200724_3.raw	F2	3.74		1
		FALSE	Medium	Sequest HT (A3)	Selected	[K].DEANRPDTTEAGLAK.[L]		1	RecPY14His	RecPY14His	0	3	1	0	1	1	529.924	1587.76	1587.76	-2.39	-0.00126	HCD (High Energy Collision Dissociation)	MS2	56.8242	71.079	20.1977	5497	PY14_273_109186_PY14-20_A725-20200724_3.raw	F2	1.96		1
		FALSE	High	Sequest HT (A3)	Unambiguous	[K].DEANRPDTTEAGLAK.[L]		1	RecPY14His	RecPY14His	0	2	1	0	1	1	794.383	1587.76	1587.76	-0.99	-0.00079	HCD (High Energy Collision Dissociation)	MS2	0	1.45	14.2173	3234	PY14_273_109186_PY14-20_A725-20200724_3.raw	F2	3.02		1				125439172608	13.71
		FALSE	High	Mascot (A5)	Unambiguous	[K].DEANRPDTTEAGLAK.[L]		1	RecPY14His	RecPY14His	0	3	1	0	1	1	529.925	1587.76	1587.76	-0.77	-0.00041	HCD (High Energy Collision Dissociation)	MS2	6.69568	24.522	24.6099	6453	PY14_257_109481_P14_A725_20201216_1.raw	F1		36	1	13	13	5.09331e-05	556389760	24.62
		FALSE	High	Mascot (A5)	Unambiguous	[K].DEANRPDTTEAGLAK.[L]		1	RecPY14His	RecPY14His	0	3	1	0	1	1	529.925	1587.76	1587.76	-0.2	-0.0001	HCD (High Energy Collision Dissociation)	MS2	2.62959	4.871	15.5993	3716	PY14_273_109186_PY14-20_A725-20200724_3.raw	F2		39	1	13	13	2.59418e-05	361876586496	13.71
		FALSE	High	Mascot (A5)	Unambiguous	[K].DEANRPDTTEAGLAK.[L]		1	RecPY14His	RecPY14His	0	3	1	0	1	1	529.924	1587.76	1587.76	-1.58	-0.00084	HCD (High Energy Collision Dissociation)	MS2	42.6527	63.053	29.9955	8889	PY14_257_109481_P14_A725_20201216_1.raw	F1		16	1	13	13	0.00485289	89717416	30.02
		FALSE	High	Sequest HT (A3)	Unambiguous	[K].DEANRPDTTEAGLAK.[L]		1	RecPY14His	RecPY14His	0	3	1	0	1	1	529.925	1587.76	1587.76	0.27	0.00014	HCD (High Energy Collision Dissociation)	MS2	3.33082	200	62.26	18496	PY14_257_109481_P14_A725_20201216_1.raw	F1	2.49		1				277517	62.35
		FALSE	High	Sequest HT (A3)	Unambiguous	[K].DEANRPDTTEAGLAK.[L]		1	RecPY14His	RecPY14His	0	3	1	0	1	1	529.924	1587.76	1587.76	-1.69	-0.0009	HCD (High Energy Collision Dissociation)	MS2	30.9454	200	40.2392	12919	PY14_257_109481_P14_A725_20201216_1.raw	F1	2.75		1				31949408	40.62
		FALSE	High	Mascot (A5)	Unambiguous	[K].DEANRPDTTEAGLAK.[L]		1	RecPY14His	RecPY14His	0	3	1	0	1	1	529.925	1587.76	1587.76	-0.43	-0.00023	HCD (High Energy Collision Dissociation)	MS2	0	9.184	20.372	4658	PY14_257_109481_P14_A725_20201216_1.raw	F1		55	1	13	13	6.39735e-07	1012245376	20.37
		FALSE	High	Mascot (A5)	Unambiguous	[K].DEANRPDTTEAGLAK.[L]		1	RecPY14His	RecPY14His	0	2	1	0	1	1	794.383	1587.76	1587.76	-1.38	-0.00109	HCD (High Energy Collision Dissociation)	MS2	0	67.665	19.5189	4331	PY14_257_109481_P14_A725_20201216_1.raw	F1		70	1	13	13	1.95884e-08	499735328	19.02
		FALSE	High	Sequest HT (A3)	Unambiguous	[K].DEANRPDTTEAGLAK.[L]		1	RecPY14His	RecPY14His	0	2	1	0	1	1	794.38	1587.75	1587.76	-5.15	-0.00409	HCD (High Energy Collision Dissociation)	MS2	0	100.6	22.8365	5691	PY14_257_109481_P14_A725_20201216_1.raw	F1	3.34		1				111718984	22.99
		FALSE	High	Sequest HT (A3)	Selected	[K].DEANRPDTTEAGLAK.[L]		1	RecPY14His	RecPY14His	0	2	1	0	1	1	794.382	1587.76	1587.76	-2.76	-0.00219	HCD (High Energy Collision Dissociation)	MS2	0	83.23	21.638	5157	PY14_257_109481_P14_A725_20201216_1.raw	F1	2.49		1				211709808	21.73
		FALSE	High	Sequest HT (A3)	Unambiguous	[K].DEANRPDTTEAGLAK.[L]		1	RecPY14His	RecPY14His	0	2	1	0	1	1	794.382	1587.76	1587.76	-3.07	-0.00244	HCD (High Energy Collision Dissociation)	MS2	51.1349	105.202	23.097	5807	PY14_257_109481_P14_A725_20201216_1.raw	F1	3.44		1				111718984	22.99
		FALSE	High	Sequest HT (A3)	Unambiguous	[K].DEANRPDTTEAGLAK.[L]		1	RecPY14His	RecPY14His	0	2	1	0	1	1	794.385	1587.76	1587.76	1.31	0.00104	HCD (High Energy Collision Dissociation)	MS2	8.99278	142.094	21.1218	4937	PY14_257_109481_P14_A725_20201216_1.raw	F1	4.14		1
		FALSE	High	Mascot (A5)	Unambiguous	[K].DEANRPDTTEAGLAK.[L]		1	RecPY14His	RecPY14His	0	2	1	0	1	1	794.383	1587.76	1587.76	-1.46	-0.00116	HCD (High Energy Collision Dissociation)	MS2	15.1339	200	54.6488	16851	PY14_257_109481_P14_A725_20201216_1.raw	F1		41	1	13	13	1.57761e-05	1.82841e+06	54.67
		FALSE	Medium	Sequest HT (A3)	Unambiguous	[K].DEANRPDTTEAGLAK.[L]		1	RecPY14His	RecPY14His	0	3	1	0	1	1	529.925	1587.76	1587.76	0.15	8e-05	HCD (High Energy Collision Dissociation)	MS2	10.1331	200	39.5006	12536	PY14_273_109186_PY14-20_A725-20200724_3.raw	F2	1.41		1
		FALSE	High	Sequest HT (A3)	Unambiguous	[K].DEANRPDTTEAGLAK.[L]		1	RecPY14His	RecPY14His	0	2	1	0	1	1	794.384	1587.76	1587.76	-0.53	-0.00042	HCD (High Energy Collision Dissociation)	MS2	9.41047	139.364	19.4954	5228	PY14_273_109186_PY14-20_A725-20200724_3.raw	F2	2.78		1
		FALSE	High	Mascot (A5)	Unambiguous	[K].DEANRPDTTEAGLAK.[L]		1	RecPY14His	RecPY14His	0	2	1	0	1	1	794.384	1587.76	1587.76	-0.3	-0.00024	HCD (High Energy Collision Dissociation)	MS2	43.2361	87.864	19.1684	5101	PY14_273_109186_PY14-20_A725-20200724_3.raw	F2		13	1	13	13	0.00993116
		FALSE	High	Mascot (A5)	Unambiguous	[K].DEANRPDTTEAGLAK.[L]		1	RecPY14His	RecPY14His	0	2	1	0	1	1	794.384	1587.76	1587.76	-0.23	-0.00018	HCD (High Energy Collision Dissociation)	MS2	4.69466	200	15.6261	3047	PY14_257_109481_P14_A725_20201216_1.raw	F1		83	1	13	13	8.93305e-10	174257668096	16.23
		FALSE	High	Mascot (A5)	Unambiguous	[K].DEANRPDTTEAGLAK.[L]		1	RecPY14His	RecPY14His	0	2	1	0	1	1	794.384	1587.76	1587.76	-0.53	-0.00042	HCD (High Energy Collision Dissociation)	MS2	9.41047	139.364	19.4954	5228	PY14_273_109186_PY14-20_A725-20200724_3.raw	F2		25	1	13	13	0.000626614
		FALSE	High	Sequest HT (A3)	Unambiguous	[K].DEANRPDTTEAGLAK.[L]		1	RecPY14His	RecPY14His	0	2	1	0	1	1	794.382	1587.76	1587.76	-2.92	-0.00232	HCD (High Energy Collision Dissociation)	MS2	13.7296	200	18.4578	4809	PY14_273_109186_PY14-20_A725-20200724_3.raw	F2	2.91		1
		FALSE	High	Sequest HT (A3)	Unambiguous	[K].DEANRPDTTEAGLAK.[L]		1	RecPY14His	RecPY14His	0	3	1	0	1	1	529.925	1587.76	1587.76	0.27	0.00014	HCD (High Energy Collision Dissociation)	MS2	41.387	200	47.4635	15108	PY14_257_109481_P14_A725_20201216_1.raw	F1	2.63		1				35319080	47.23
		FALSE	Medium	Sequest HT (A3)	Unambiguous	[K].DEANRPDTTEAGLAK.[L]		1	RecPY14His	RecPY14His	0	3	1	0	1	1	529.925	1587.76	1587.76	-0.2	-0.0001	HCD (High Energy Collision Dissociation)	MS2	9.98442	200	40.9515	12931	PY14_273_109186_PY14-20_A725-20200724_3.raw	F2	1.54		1
		FALSE	High	Mascot (A5)	Unambiguous	[K].DEANRPDTTEAGLAK.[L]		1	RecPY14His	RecPY14His	0	2	1	0	1	1	794.383	1587.76	1587.76	-1.53	-0.00122	HCD (High Energy Collision Dissociation)	MS2	0.0716565	0.042	16.1771	3217	PY14_257_109481_P14_A725_20201216_1.raw	F1		82	1	13	13	1.21339e-09	174257668096	16.23
		FALSE	Medium	Sequest HT (A3)	Unambiguous	[K].DEANRPDTTEAGLAK.[L]		1	RecPY14His	RecPY14His	0	3	1	0	1	1	529.925	1587.76	1587.76	0.27	0.00014	HCD (High Energy Collision Dissociation)	MS2	24.6082	200	39.2024	12457	PY14_273_109186_PY14-20_A725-20200724_3.raw	F2	2.23		1
		FALSE	Medium	Sequest HT (A3)	Selected	[K].DEANRPDTTEAGLAK.[L]		1	RecPY14His	RecPY14His	0	2	1	0	1	1	794.383	1587.76	1587.76	-1.07	-0.00085	HCD (High Energy Collision Dissociation)	MS2	40.2707	200	46.2312	14761	PY14_257_109481_P14_A725_20201216_1.raw	F1	1.29		1
		FALSE	High	Mascot (A5)	Unambiguous	[K].DEANRPDTTEAGLAK.[L]		1	RecPY14His	RecPY14His	0	3	1	0	1	1	529.925	1587.76	1587.76	-0.77	-0.00041	HCD (High Energy Collision Dissociation)	MS2	0.599401	2.627	18.0696	3822	PY14_257_109481_P14_A725_20201216_1.raw	F1		46	1	13	13	4.70977e-06	387694788608	16.23
		FALSE	High	Sequest HT (A3)	Unambiguous	[K].DEANRPDTTEAGLAK.[L]		1	RecPY14His	RecPY14His	0	2	1	0	1	1	794.383	1587.76	1587.76	-1.46	-0.00116	HCD (High Energy Collision Dissociation)	MS2	15.1339	200	54.6488	16851	PY14_257_109481_P14_A725_20201216_1.raw	F1	1.99		1				1.82841e+06	54.67
		FALSE	Medium	Sequest HT (A3)	Unambiguous	[K].DEANRPDTTEAGLAK.[L]		1	RecPY14His	RecPY14His	0	3	1	0	1	1	529.924	1587.76	1587.76	-3.08	-0.00163	HCD (High Energy Collision Dissociation)	MS2	33.7842	13.292	18.6253	4868	PY14_273_109186_PY14-20_A725-20200724_3.raw	F2	1.76		1
		FALSE	Medium	Sequest HT (A3)	Unambiguous	[K].DEANRPDTTEAGLAK.[L]		1	RecPY14His	RecPY14His	0	3	1	0	1	1	529.926	1587.76	1587.76	2.11	0.00112	HCD (High Energy Collision Dissociation)	MS2	33.4674	185.277	42.1974	13534	PY14_257_109481_P14_A725_20201216_1.raw	F1	1.95		1
		FALSE	High	Mascot (A5)	Unambiguous	[K].DEANRPDTTEAGLAK.[L]		1	RecPY14His	RecPY14His	0	3	1	0	1	1	529.925	1587.76	1587.76	-0.77	-0.00041	HCD (High Energy Collision Dissociation)	MS2	3.15142	5.872	15.8829	3816	PY14_273_109186_PY14-20_A725-20200724_3.raw	F2		37	1	13	13	3.60579e-05	361876586496	13.71
		FALSE	High	Mascot (A5)	Unambiguous	[K].DEANRPDTTEAGLAK.[L]		1	RecPY14His	RecPY14His	0	3	1	0	1	1	529.925	1587.76	1587.76	-0.77	-0.00041	HCD (High Energy Collision Dissociation)	MS2	1.53252	9.588	16.9667	4221	PY14_273_109186_PY14-20_A725-20200724_3.raw	F2		43	1	13	13	1.11173e-05
		FALSE	High	Sequest HT (A3)	Unambiguous	[K].DEANRPDTTEAGLAK.[L]		1	RecPY14His	RecPY14His	0	3	1	0	1	1	529.925	1587.76	1587.76	-0.89	-0.00047	HCD (High Energy Collision Dissociation)	MS2	3.05707	19.561	19.6114	5269	PY14_273_109186_PY14-20_A725-20200724_3.raw	F2	2.66		1				1059586176	19.32
		FALSE	High	Mascot (A5)	Unambiguous	[K].DEANRPDTTEAGLAK.[L]		1	RecPY14His	RecPY14His	0	3	1	0	1	1	529.925	1587.76	1587.76	0.27	0.00014	HCD (High Energy Collision Dissociation)	MS2	6.56051	200	41.2379	13009	PY14_273_109186_PY14-20_A725-20200724_3.raw	F2		30	1	13	13	0.000214289	39172232	41.01
		FALSE	High	Mascot (A5)	Unambiguous	[K].DEANRPDTTEAGLAK.[L]		1	RecPY14His	RecPY14His	0	2	1	0	1	1	794.383	1587.76	1587.76	-1.23	-0.00097	HCD (High Energy Collision Dissociation)	MS2	13.1287	200	53.3113	16510	PY14_257_109481_P14_A725_20201216_1.raw	F1		39	1	13	13	2.5527e-05	22674696	53.58
		FALSE	Medium	Sequest HT (A3)	Unambiguous	[K].DEANRPDTTEAGLAK.[L]		1	RecPY14His	RecPY14His	0	3	1	0	1	1	529.925	1587.76	1587.76	0.38	0.0002	HCD (High Energy Collision Dissociation)	MS2	1.92914	200	69.9832	20074	PY14_257_109481_P14_A725_20201216_1.raw	F1	2.27		1
		FALSE	High	Sequest HT (A3)	Selected	[K].DEANRPDTTEAGLAK.[L]		1	RecPY14His	RecPY14His	0	3	1	0	1	1	529.928	1587.77	1587.76	5.57	0.00295	HCD (High Energy Collision Dissociation)	MS2	0.694705	7.792	13.66	3039	PY14_273_109186_PY14-20_A725-20200724_3.raw	F2	3.69		1				361876586496	13.71
		FALSE	High	Sequest HT (A3)	Unambiguous	[K].DEANRPDTTEAGLAK.[L]		1	RecPY14His	RecPY14His	0	3	1	0	1	1	529.925	1587.76	1587.76	0.15	8e-05	HCD (High Energy Collision Dissociation)	MS2	3.16198	200	60.9528	18224	PY14_257_109481_P14_A725_20201216_1.raw	F1	2.42		1				147864	60.93
		FALSE	Medium	Sequest HT (A3)	Unambiguous	[K].DEANRPDTTEAGLAK.[L]		1	RecPY14His	RecPY14His	0	3	1	0	1	1	529.925	1587.76	1587.76	-0.43	-0.00023	HCD (High Energy Collision Dissociation)	MS2	47.8397	61.413	46.0113	14700	PY14_257_109481_P14_A725_20201216_1.raw	F1	1.5		1
		FALSE	High	Sequest HT (A3)	Unambiguous	[K].DEANRPDTTEAGLAK.[L]		1	RecPY14His	RecPY14His	0	2	1	0	1	1	794.383	1587.76	1587.76	-1.38	-0.00109	HCD (High Energy Collision Dissociation)	MS2	0	67.665	19.5189	4331	PY14_257_109481_P14_A725_20201216_1.raw	F1	3.46		1				499735328	19.02
		FALSE	High	Sequest HT (A3)	Unambiguous	[K].DEANRPDTTEAGLAK.[L]		1	RecPY14His	RecPY14His	0	2	1	0	1	1	794.384	1587.76	1587.76	0.24	0.00019	HCD (High Energy Collision Dissociation)	MS2	24.1991	79.036	19.7908	4445	PY14_257_109481_P14_A725_20201216_1.raw	F1	4.68		1				499735328	19.02
		FALSE	High	Mascot (A5)	Unambiguous	[K].DEANRPDTTEAGLAK.[L]		1	RecPY14His	RecPY14His	0	3	1	0	1	1	529.925	1587.76	1587.76	-0.54	-0.00029	HCD (High Energy Collision Dissociation)	MS2	14.3547	15.745	18.3405	4760	PY14_273_109186_PY14-20_A725-20200724_3.raw	F2		29	1	13	13	0.000233884	1479720064	17.95
		FALSE	High	Sequest HT (A3)	Unambiguous	[K].DEANRPDTTEAGLAK.[L]		1	RecPY14His	RecPY14His	0	3	1	0	1	1	529.925	1587.76	1587.76	-0.43	-0.00023	HCD (High Energy Collision Dissociation)	MS2	0	9.184	20.372	4658	PY14_257_109481_P14_A725_20201216_1.raw	F1	3.51		1				1012245376	20.37
		FALSE	High	Sequest HT (A3)	Unambiguous	[K].DEANRPDTTEAGLAK.[L]		1	RecPY14His	RecPY14His	0	3	1	0	1	1	529.925	1587.76	1587.76	0.38	0.0002	HCD (High Energy Collision Dissociation)	MS2	1.63302	200	61.4785	18335	PY14_257_109481_P14_A725_20201216_1.raw	F1	2.55		1				109469	61.63
		FALSE	High	Mascot (A5)	Unambiguous	[K].DEANRPDTTEAGLAK.[L]		1	RecPY14His	RecPY14His	0	3	1	0	1	1	529.925	1587.76	1587.76	-0.2	-0.0001	HCD (High Energy Collision Dissociation)	MS2	8.849	200	37.2036	11901	PY14_273_109186_PY14-20_A725-20200724_3.raw	F2		36	1	13	13	4.84172e-05	75642656	36.76
		FALSE	High	Sequest HT (A3)	Unambiguous	[K].DEANRPDTTEAGLAK.[L]		1	RecPY14His	RecPY14His	0	3	1	0	1	1	529.928	1587.77	1587.76	5.46	0.00289	HCD (High Energy Collision Dissociation)	MS2	0.176799	0.039	13.9512	3141	PY14_273_109186_PY14-20_A725-20200724_3.raw	F2	2.78		1				361876586496	13.71
		FALSE	High	Sequest HT (A3)	Unambiguous	[K].DEANRPDTTEAGLAK.[L]		1	RecPY14His	RecPY14His	0	2	1	0	1	1	794.384	1587.76	1587.76	-0.53	-0.00042	HCD (High Energy Collision Dissociation)	MS2	0.202313	0.119	13.9309	3133	PY14_273_109186_PY14-20_A725-20200724_3.raw	F2	2.89		1				125439172608	13.71
		FALSE	High	Mascot (A5)	Unambiguous	[K].DEANRPDTTEAGLAK.[L]		1	RecPY14His	RecPY14His	0	3	1	0	1	1	529.924	1587.76	1587.76	-1.69	-0.0009	HCD (High Energy Collision Dissociation)	MS2	0	11.146	17.2395	4332	PY14_273_109186_PY14-20_A725-20200724_3.raw	F2		38	1	13	13	3.41193e-05	1479720064	17.95
		FALSE	High	Mascot (A5)	Unambiguous	[K].DEANRPDTTEAGLAK.[L]		1	RecPY14His	RecPY14His	0	2	1	0	1	1	794.383	1587.76	1587.76	-1.69	-0.00134	HCD (High Energy Collision Dissociation)	MS2	28.7361	200	46.5875	14862	PY14_257_109481_P14_A725_20201216_1.raw	F1		16	1	13	13	0.00464515	4739165	46.6
		FALSE	Medium	Sequest HT (A3)	Unambiguous	[K].DEANRPDTTEAGLAK.[L]		1	RecPY14His	RecPY14His	0	3	1	0	1	1	529.923	1587.75	1587.76	-4.12	-0.00218	HCD (High Energy Collision Dissociation)	MS2	24.9009	68.582	20.7367	5737	PY14_273_109186_PY14-20_A725-20200724_3.raw	F2	2.22		1
		FALSE	High	Sequest HT (A3)	Unambiguous	[K].DEANRPDTTEAGLAK.[L]		1	RecPY14His	RecPY14His	0	3	1	0	1	1	529.925	1587.76	1587.76	0.27	0.00014	HCD (High Energy Collision Dissociation)	MS2	32.5552	109.341	40.9338	13139	PY14_257_109481_P14_A725_20201216_1.raw	F1	2.67		1				76918104	41.07
		FALSE	High	Mascot (A5)	Unambiguous	[K].DEANRPDTTEAGLAK.[L]		1	RecPY14His	RecPY14His	0	3	1	0	1	1	529.925	1587.76	1587.76	-0.2	-0.0001	HCD (High Energy Collision Dissociation)	MS2	21.2904	131.528	27.098	8394	PY14_273_109186_PY14-20_A725-20200724_3.raw	F2		31	1	13	13	0.00017378	196747840	27.29
		FALSE	High	Sequest HT (A3)	Unambiguous	[K].DEANRPDTTEAGLAK.[L]		1	RecPY14His	RecPY14His	0	3	1	0	1	1	529.924	1587.76	1587.76	-3.08	-0.00163	HCD (High Energy Collision Dissociation)	MS2	26.1722	9.913	22.1705	5378	PY14_257_109481_P14_A725_20201216_1.raw	F1	2.81		1				859509504	21.99
		FALSE	High	Mascot (A5)	Unambiguous	[K].DEANRPDTTEAGLAK.[L]		1	RecPY14His	RecPY14His	0	3	1	0	1	1	529.925	1587.76	1587.76	-0.89	-0.00047	HCD (High Energy Collision Dissociation)	MS2	15.7948	200	40.6527	12848	PY14_273_109186_PY14-20_A725-20200724_3.raw	F2		27	1	13	13	0.000355631	29576764	40.6
		FALSE	High	Sequest HT (A3)	Unambiguous	[K].DEANRPDTTEAGLAK.[L]		1	RecPY14His	RecPY14His	0	3	1	0	1	1	529.923	1587.76	1587.76	-3.31	-0.00175	HCD (High Energy Collision Dissociation)	MS2	26.0787	135.277	27.3057	7676	PY14_257_109481_P14_A725_20201216_1.raw	F1	3.59		1				83960704	27.44
		FALSE	High	Sequest HT (A3)	Unambiguous	[K].DEANRPDTTEAGLAK.[L]		1	RecPY14His	RecPY14His	0	3	1	0	1	1	529.925	1587.76	1587.76	-0.43	-0.00023	HCD (High Energy Collision Dissociation)	MS2	0	7.779	19.7046	4407	PY14_257_109481_P14_A725_20201216_1.raw	F1	3.85		1				2022556416	19.16
		FALSE	High	Sequest HT (A3)	Unambiguous	[K].DEANRPDTTEAGLAK.[L]		1	RecPY14His	RecPY14His	0	3	1	0	1	1	529.924	1587.76	1587.76	-1.69	-0.0009	HCD (High Energy Collision Dissociation)	MS2	9.98134	9.323	20.6485	4751	PY14_257_109481_P14_A725_20201216_1.raw	F1	3.32		1				1012245376	20.37
		FALSE	High	Mascot (A5)	Unambiguous	[K].DEANRPDTTEAGLAK.[L]		1	RecPY14His	RecPY14His	0	3	1	0	1	1	529.925	1587.76	1587.76	-0.77	-0.00041	HCD (High Energy Collision Dissociation)	MS2	14.114	182.478	39.5787	12702	PY14_257_109481_P14_A725_20201216_1.raw	F1		27	1	13	13	0.000389942
		FALSE	High	Sequest HT (A3)	Unambiguous	[K].DEANRPDTTEAGLAK.[L]		1	RecPY14His	RecPY14His	0	3	1	0	1	1	529.925	1587.76	1587.76	0.27	0.00014	HCD (High Energy Collision Dissociation)	MS2	1.89512	200	61.2134	18280	PY14_257_109481_P14_A725_20201216_1.raw	F1	2.4		1				185967	61.01
		FALSE	High	Mascot (A5)	Unambiguous	[K].DEANRPDTTEAGLAK.[L]		1	RecPY14His	RecPY14His	0	3	1	0	1	1	529.925	1587.76	1587.76	-0.08	-4e-05	HCD (High Energy Collision Dissociation)	MS2	53.0162	61.826	42.9089	13757	PY14_257_109481_P14_A725_20201216_1.raw	F1		14	1	13	13	0.00785236	65102584	42.49
		FALSE	High	Mascot (A5)	Unambiguous	[K].DEANRPDTTEAGLAK.[L]		1	RecPY14His	RecPY14His	0	3	1	0	1	1	529.925	1587.76	1587.76	-0.08	-4e-05	HCD (High Energy Collision Dissociation)	MS2	37.216	89.544	46.2792	14775	PY14_257_109481_P14_A725_20201216_1.raw	F1		30	1	13	13	0.000178238	39309180	46.32
		FALSE	High	Mascot (A5)	Unambiguous	[K].DEANRPDTTEAGLAK.[L]		1	RecPY14His	RecPY14His	0	2	1	0	1	1	794.384	1587.76	1587.76	-0.61	-0.00048	HCD (High Energy Collision Dissociation)	MS2	19.9768	200	52.1199	16200	PY14_257_109481_P14_A725_20201216_1.raw	F1		24	1	13	13	0.000810961	16252569	51.78
		FALSE	High	Sequest HT (A3)	Unambiguous	[K].DEANRPDTTEAGLAK.[L]		1	RecPY14His	RecPY14His	0	3	1	0	1	1	529.927	1587.77	1587.76	3.03	0.00161	HCD (High Energy Collision Dissociation)	MS2	4.59963	24.682	24.8887	6562	PY14_257_109481_P14_A725_20201216_1.raw	F1	2.97		1				556389760	24.62
		FALSE	High	Sequest HT (A3)	Unambiguous	[K].DEANRPDTTEAGLAK.[L]		1	RecPY14His	RecPY14His	0	3	1	0	1	1	529.924	1587.76	1587.76	-2.39	-0.00126	HCD (High Energy Collision Dissociation)	MS2	24.7693	200	14.7819	2819	PY14_257_109481_P14_A725_20201216_1.raw	F1	2.98		1				40781688	14.93
		FALSE	Medium	Sequest HT (A3)	Unambiguous	[K].DEANRPDTTEAGLAK.[L]		1	RecPY14His	RecPY14His	0	3	1	0	1	1	529.925	1587.76	1587.76	-0.2	-0.0001	HCD (High Energy Collision Dissociation)	MS2	8.849	200	37.2036	11901	PY14_273_109186_PY14-20_A725-20200724_3.raw	F2	2.27		1
		FALSE	Medium	Sequest HT (A3)	Selected	[K].DEANRPDTTEAGLAK.[L]		1	RecPY14His	RecPY14His	0	3	1	0	1	1	529.926	1587.76	1587.76	1.07	0.00057	HCD (High Energy Collision Dissociation)	MS2	79.9153	5.487	13.4289	2953	PY14_273_109186_PY14-20_A725-20200724_3.raw	F2	1.43		1
		FALSE	Medium	Sequest HT (A3)	Unambiguous	[K].DEANRPDTTEAGLAK.[L]		1	RecPY14His	RecPY14His	0	3	1	0	1	1	529.925	1587.76	1587.76	0.15	8e-05	HCD (High Energy Collision Dissociation)	MS2	5.95276	200	68.7012	19815	PY14_257_109481_P14_A725_20201216_1.raw	F1	1.87		1
		FALSE	High	Sequest HT (A3)	Unambiguous	[K].DEANRPDTTEAGLAK.[L]		1	RecPY14His	RecPY14His	0	2	1	0	1	1	794.383	1587.76	1587.76	-1.38	-0.00109	HCD (High Energy Collision Dissociation)	MS2	0.160474	4.848	15.9173	3133	PY14_257_109481_P14_A725_20201216_1.raw	F1	4.58		1				174257668096	16.23
		FALSE	Medium	Sequest HT (A3)	Unambiguous	[K].DEANRPDTTEAGLAK.[L]		1	RecPY14His	RecPY14His	0	3	1	0	1	1	529.925	1587.76	1587.76	0.27	0.00014	HCD (High Energy Collision Dissociation)	MS2	8.50497	200	41.5293	13085	PY14_273_109186_PY14-20_A725-20200724_3.raw	F2	1.91		1
		FALSE	High	Sequest HT (A3)	Unambiguous	[K].DEANRPDTTEAGLAK.[L]		1	RecPY14His	RecPY14His	0	2	1	0	1	1	794.383	1587.76	1587.76	-1.53	-0.00122	HCD (High Energy Collision Dissociation)	MS2	2.10004	27.881	18.112	3835	PY14_257_109481_P14_A725_20201216_1.raw	F1	4.08		1				174257668096	16.23
		FALSE	Medium	Sequest HT (A3)	Unambiguous	[K].DEANRPDTTEAGLAK.[L]		1	RecPY14His	RecPY14His	0	3	1	0	1	1	529.925	1587.76	1587.76	0.38	0.0002	HCD (High Energy Collision Dissociation)	MS2	2.62184	200	37.5044	11988	PY14_273_109186_PY14-20_A725-20200724_3.raw	F2	2		1
		FALSE	High	Sequest HT (A3)	Unambiguous	[K].DEANRPDTTEAGLAK.[L]		1	RecPY14His	RecPY14His	0	2	1	0	1	1	794.383	1587.76	1587.76	-1.61	-0.00128	HCD (High Energy Collision Dissociation)	MS2	35.048	83.243	20.1333	4571	PY14_257_109481_P14_A725_20201216_1.raw	F1	4.24		1				499735328	19.02
		FALSE	Medium	Sequest HT (A3)	Unambiguous	[K].DEANRPDTTEAGLAK.[L]		1	RecPY14His	RecPY14His	0	2	1	0	1	1	794.383	1587.76	1587.76	-0.84	-0.00067	HCD (High Energy Collision Dissociation)	MS2	24.7186	107.392	21.106	5894	PY14_273_109186_PY14-20_A725-20200724_3.raw	F2	1.8		1
		FALSE	High	Sequest HT (A3)	Unambiguous	[K].DEANRPDTTEAGLAK.[L]		1	RecPY14His	RecPY14His	0	3	1	0	1	1	529.928	1587.77	1587.76	4.76	0.00252	HCD (High Energy Collision Dissociation)	MS2	0.208887	0.03	13.6923	3052	PY14_273_109186_PY14-20_A725-20200724_3.raw	F2	3.18		1				361876586496	13.71
		FALSE	Medium	Sequest HT (A3)	Unambiguous	[K].DEANRPDTTEAGLAK.[L]		1	RecPY14His	RecPY14His	0	3	1	0	1	1	529.925	1587.76	1587.76	0.38	0.0002	HCD (High Energy Collision Dissociation)	MS2	7.54624	200	67.1585	19503	PY14_257_109481_P14_A725_20201216_1.raw	F1	1.86		1
		FALSE	High	Sequest HT (A3)	Unambiguous	[K].DEANRPDTTEAGLAK.[L]		1	RecPY14His	RecPY14His	0	3	1	0	1	1	529.923	1587.76	1587.76	-3.19	-0.00169	HCD (High Energy Collision Dissociation)	MS2	42.1139	20.267	20.0915	4557	PY14_257_109481_P14_A725_20201216_1.raw	F1	3.21		1				1012245376	20.37
		FALSE	Medium	Sequest HT (A3)	Unambiguous	[K].DEANRPDTTEAGLAK.[L]		1	RecPY14His	RecPY14His	0	3	1	0	1	1	529.925	1587.76	1587.76	0.27	0.00014	HCD (High Energy Collision Dissociation)	MS2	6.56051	200	41.2379	13009	PY14_273_109186_PY14-20_A725-20200724_3.raw	F2	1.71		1
		FALSE	High	Sequest HT (A3)	Unambiguous	[K].DEANRPDTTEAGLAK.[L]		1	RecPY14His	RecPY14His	0	3	1	0	1	1	529.922	1587.75	1587.76	-5.5	-0.00291	HCD (High Energy Collision Dissociation)	MS2	0	114.082	27.5852	7808	PY14_257_109481_P14_A725_20201216_1.raw	F1	3.33		1				83960704	27.44
		FALSE	High	Mascot (A5)	Unambiguous	[K].DEANRPDTTEAGLAK.[L]		1	RecPY14His	RecPY14His	0	3	1	0	1	1	529.925	1587.76	1587.76	-0.2	-0.0001	HCD (High Energy Collision Dissociation)	MS2	36.5283	57.084	24.0556	7086	PY14_273_109186_PY14-20_A725-20200724_3.raw	F2		30	1	13	13	0.000187068	164397536	23.97
		FALSE	High	Sequest HT (A3)	Unambiguous	[K].DEANRPDTTEAGLAK.[L]		1	RecPY14His	RecPY14His	0	2	1	0	1	1	794.383	1587.76	1587.76	-0.76	-0.00061	HCD (High Energy Collision Dissociation)	MS2	0.181723	0.069	13.6705	3043	PY14_273_109186_PY14-20_A725-20200724_3.raw	F2	3.07		1				125439172608	13.71
		FALSE	High	Sequest HT (A3)	Unambiguous	[K].DEANRPDTTEAGLAK.[L]		1	RecPY14His	RecPY14His	0	3	1	0	1	1	529.926	1587.76	1587.76	1.3	0.00069	HCD (High Energy Collision Dissociation)	MS2	20.978	113.349	23.0006	6661	PY14_273_109186_PY14-20_A725-20200724_3.raw	F2	2.49		1				164377104	22.64
		FALSE	High	Sequest HT (A3)	Unambiguous	[K].DEANRPDTTEAGLAK.[L]		1	RecPY14His	RecPY14His	0	3	1	0	1	1	529.925	1587.76	1587.76	0.15	8e-05	HCD (High Energy Collision Dissociation)	MS2	4.84742	32.927	25.4342	6792	PY14_257_109481_P14_A725_20201216_1.raw	F1	3.19		1				387418944	25.03
		FALSE	High	Mascot (A5)	Unambiguous	[K].DEANRPDTTEAGLAK.[L]		1	RecPY14His	RecPY14His	0	3	1	0	1	1	529.925	1587.76	1587.76	-0.54	-0.00029	HCD (High Energy Collision Dissociation)	MS2	36.3733	68.656	31.1208	9356	PY14_257_109481_P14_A725_20201216_1.raw	F1		27	1	13	13	0.000390841	138933872	31.15
		FALSE	High	Mascot (A5)	Unambiguous	[K].DEANRPDTTEAGLAK.[L]		1	RecPY14His	RecPY14His	0	3	1	0	1	1	529.925	1587.76	1587.76	-0.2	-0.0001	HCD (High Energy Collision Dissociation)	MS2	1.15466	3.671	18.3524	3921	PY14_257_109481_P14_A725_20201216_1.raw	F1		52	1	13	13	1.2735e-06	387694788608	16.23
		FALSE	High	Sequest HT (A3)	Unambiguous	[K].DEANRPDTTEAGLAK.[L]		1	RecPY14His	RecPY14His	0	3	1	0	1	1	529.925	1587.76	1587.76	-1.12	-0.00059	HCD (High Energy Collision Dissociation)	MS2	1.05497	4.059	18.9087	4108	PY14_257_109481_P14_A725_20201216_1.raw	F1	3.45		1				2022556416	19.16
		FALSE	High	Mascot (A5)	Unambiguous	[K].DEANRPDTTEAGLAK.[L]		1	RecPY14His	RecPY14His	0	3	1	0	1	1	529.925	1587.76	1587.76	-0.2	-0.0001	HCD (High Energy Collision Dissociation)	MS2	35.3623	120.44	46.9064	14955	PY14_257_109481_P14_A725_20201216_1.raw	F1		21	1	13	13	0.00158489	41931056	46.66
		FALSE	High	Mascot (A5)	Unambiguous	[K].DEANRPDTTEAGLAK.[L]		1	RecPY14His	RecPY14His	0	3	1	0	1	1	529.925	1587.76	1587.76	-0.77	-0.00041	HCD (High Energy Collision Dissociation)	MS2	23.4902	200	39.2838	12602	PY14_257_109481_P14_A725_20201216_1.raw	F1		31	1	13	13	0.000166725	26571876	38.96
		FALSE	High	Sequest HT (A3)	Unambiguous	[K].DEANRPDTTEAGLAK.[L]		1	RecPY14His	RecPY14His	0	3	1	0	1	1	529.925	1587.76	1587.76	-0.43	-0.00023	HCD (High Energy Collision Dissociation)	MS2	1.1837	6.317	19.4334	4297	PY14_257_109481_P14_A725_20201216_1.raw	F1	3.13		1				2022556416	19.16
		FALSE	Medium	Sequest HT (A3)	Unambiguous	[K].DEANRPDTTEAGLAK.[L]		1	RecPY14His	RecPY14His	0	3	1	0	1	1	529.925	1587.76	1587.76	0.38	0.0002	HCD (High Energy Collision Dissociation)	MS2	2.24939	200	60.4352	18114	PY14_257_109481_P14_A725_20201216_1.raw	F1	2.18		1
		FALSE	Medium	Sequest HT (A3)	Unambiguous	[K].DEANRPDTTEAGLAK.[L]		1	RecPY14His	RecPY14His	0	3	1	0	1	1	529.925	1587.76	1587.76	0.38	0.0002	HCD (High Energy Collision Dissociation)	MS2	0	200	69.7295	20024	PY14_257_109481_P14_A725_20201216_1.raw	F1	1.87		1
		FALSE	High	Sequest HT (A3)	Unambiguous	[K].DEANRPDTTEAGLAK.[L]		1	RecPY14His	RecPY14His	0	3	1	0	1	1	529.925	1587.76	1587.76	-0.31	-0.00016	HCD (High Energy Collision Dissociation)	MS2	33.8568	126.87	41.2267	13229	PY14_257_109481_P14_A725_20201216_1.raw	F1	2.6		1				76918104	41.07
		FALSE	High	Mascot (A5)	Unambiguous	[K].DEANRPDTTEAGLAK.[L]		1	RecPY14His	RecPY14His	0	3	1	0	1	1	529.925	1587.76	1587.76	-0.2	-0.0001	HCD (High Energy Collision Dissociation)	MS2	38.0452	74.856	44.4509	14238	PY14_257_109481_P14_A725_20201216_1.raw	F1		29	1	13	13	0.000244906	65707772	44.89
		FALSE	Medium	Sequest HT (A3)	Unambiguous	[K].DEANRPDTTEAGLAK.[L]		1	RecPY14His	RecPY14His	0	3	1	0	1	1	529.925	1587.76	1587.76	-0.2	-0.0001	HCD (High Energy Collision Dissociation)	MS2	3.3519	200	67.4159	19555	PY14_257_109481_P14_A725_20201216_1.raw	F1	1.87		1
		FALSE	High	Sequest HT (A3)	Unambiguous	[K].DEANRPDTTEAGLAK.[L]		1	RecPY14His	RecPY14His	0	3	1	0	1	1	529.925	1587.76	1587.76	0.5	0.00026	HCD (High Energy Collision Dissociation)	MS2	36.4491	94.403	51.7651	16106	PY14_257_109481_P14_A725_20201216_1.raw	F1	2.54		1				106340992	51.82
		FALSE	High	Sequest HT (A3)	Unambiguous	[K].DEANRPDTTEAGLAK.[L]		1	RecPY14His	RecPY14His	0	2	1	0	1	1	794.383	1587.76	1587.76	-1.38	-0.00109	HCD (High Energy Collision Dissociation)	MS2	0	45.558	19.2322	4220	PY14_257_109481_P14_A725_20201216_1.raw	F1	3.88		1				499735328	19.02
		FALSE	High	Sequest HT (A3)	Unambiguous	[K].DEANRPDTTEAGLAK.[L]		1	RecPY14His	RecPY14His	0	2	1	0	1	1	794.382	1587.76	1587.76	-2.22	-0.00177	HCD (High Energy Collision Dissociation)	MS2	8.94745	26.291	18.9392	4120	PY14_257_109481_P14_A725_20201216_1.raw	F1	4.61		1				499735328	19.02
		FALSE	High	Mascot (A5)	Unambiguous	[K].DEANRPDTTEAGLAK.[L]		1	RecPY14His	RecPY14His	0	2	1	0	1	1	794.383	1587.76	1587.76	-1.69	-0.00134	HCD (High Energy Collision Dissociation)	MS2	0	173.637	16.9827	4230	PY14_273_109186_PY14-20_A725-20200724_3.raw	F2		89	1	13	13	2.32809e-10	497934592	16.19
		FALSE	High	Mascot (A5)	Unambiguous	[K].DEANRPDTTEAGLAK.[L]		1	RecPY14His	RecPY14His	0	3	1	0	1	1	529.925	1587.76	1587.76	-1	-0.00053	HCD (High Energy Collision Dissociation)	MS2	21.5868	200	33.7671	10430	PY14_257_109481_P14_A725_20201216_1.raw	F1		35	1	13	13	6.01174e-05	77821984	33.45
		FALSE	High	Sequest HT (A3)	Unambiguous	[K].DEANRPDTTEAGLAK.[L]		1	RecPY14His	RecPY14His	0	3	1	0	1	1	529.925	1587.76	1587.76	0.38	0.0002	HCD (High Energy Collision Dissociation)	MS2	4.8317	200	60.1785	18059	PY14_257_109481_P14_A725_20201216_1.raw	F1	2.48		1				392123	60.09
		FALSE	Medium	Sequest HT (A3)	Unambiguous	[K].DEANRPDTTEAGLAK.[L]		1	RecPY14His	RecPY14His	0	3	1	0	1	1	529.926	1587.76	1587.76	0.73	0.00038	HCD (High Energy Collision Dissociation)	MS2	0	200	69.4756	19973	PY14_257_109481_P14_A725_20201216_1.raw	F1	2.18		1
		FALSE	High	Sequest HT (A3)	Unambiguous	[K].DEANRPDTTEAGLAK.[L]		1	RecPY14His	RecPY14His	0	2	1	0	1	1	794.383	1587.76	1587.76	-1.38	-0.00109	HCD (High Energy Collision Dissociation)	MS2	0	147.52	25.1519	6673	PY14_257_109481_P14_A725_20201216_1.raw	F1	3.77		1				57499148	25.11
		FALSE	High	Sequest HT (A3)	Unambiguous	[K].DEANRPDTTEAGLAK.[L]		1	RecPY14His	RecPY14His	0	3	1	0	1	1	529.925	1587.76	1587.76	0.27	0.00014	HCD (High Energy Collision Dissociation)	MS2	1.04454	200	54.5157	16820	PY14_257_109481_P14_A725_20201216_1.raw	F1	3.04		1				7294640	54.4
		FALSE	High	Mascot (A5)	Unambiguous	[K].DEANRPDTTEAGLAK.[L]		1	RecPY14His	RecPY14His	0	3	1	0	1	1	529.925	1587.76	1587.76	-0.2	-0.0001	HCD (High Energy Collision Dissociation)	MS2	46.1372	84.334	45.3692	14510	PY14_257_109481_P14_A725_20201216_1.raw	F1		35	1	13	13	7.06318e-05	63863872	45.28
		FALSE	High	Sequest HT (A3)	Unambiguous	[K].DEANRPDTTEAGLAK.[L]		1	RecPY14His	RecPY14His	0	3	1	0	1	1	529.926	1587.76	1587.76	0.84	0.00045	HCD (High Energy Collision Dissociation)	MS2	31.2105	28.012	25.1489	6672	PY14_257_109481_P14_A725_20201216_1.raw	F1	2.95		1				387418944	25.03
		FALSE	Medium	Sequest HT (A3)	Unambiguous	[K].DEANRPDTTEAGLAK.[L]		1	RecPY14His	RecPY14His	0	3	1	0	1	1	529.925	1587.76	1587.76	0.27	0.00014	HCD (High Energy Collision Dissociation)	MS2	3.2047	200	69.2171	19919	PY14_257_109481_P14_A725_20201216_1.raw	F1	2.09		1
		FALSE	High	Sequest HT (A3)	Unambiguous	[K].DEANRPDTTEAGLAK.[L]		1	RecPY14His	RecPY14His	0	3	1	0	1	1	529.925	1587.76	1587.76	0.27	0.00014	HCD (High Energy Collision Dissociation)	MS2	4.19092	200	62.0035	18444	PY14_257_109481_P14_A725_20201216_1.raw	F1	2.57		1				185373	61.99
		FALSE	High	Sequest HT (A3)	Unambiguous	[K].DEANRPDTTEAGLAK.[L]		1	RecPY14His	RecPY14His	0	3	1	0	1	1	529.925	1587.76	1587.76	0.03	2e-05	HCD (High Energy Collision Dissociation)	MS2	0.957344	200	59.9184	18004	PY14_257_109481_P14_A725_20201216_1.raw	F1	2.32		1				297643	59.87
		FALSE	Medium	Sequest HT (A3)	Unambiguous	[K].DEANRPDTTEAGLAK.[L]		1	RecPY14His	RecPY14His	0	3	1	0	1	1	529.925	1587.76	1587.76	0.38	0.0002	HCD (High Energy Collision Dissociation)	MS2	4.58469	200	37.7755	12066	PY14_273_109186_PY14-20_A725-20200724_3.raw	F2	2.12		1
		FALSE	High	Sequest HT (A3)	Unambiguous	[K].DEANRPDTTEAGLAK.[L]		1	RecPY14His	RecPY14His	0	3	1	0	1	1	529.927	1587.77	1587.76	3.96	0.00209	HCD (High Energy Collision Dissociation)	MS2	0.0669418	2.341	13.7917	3080	PY14_273_109186_PY14-20_A725-20200724_3.raw	F2	3.92		1				361876586496	13.71
		FALSE	Medium	Sequest HT (A3)	Unambiguous	[K].DEANRPDTTEAGLAK.[L]		1	RecPY14His	RecPY14His	0	3	1	0	1	1	529.925	1587.76	1587.76	0.27	0.00014	HCD (High Energy Collision Dissociation)	MS2	5.84043	200	61.741	18388	PY14_257_109481_P14_A725_20201216_1.raw	F1	2.08		1
		FALSE	Medium	Sequest HT (A3)	Unambiguous	[K].DEANRPDTTEAGLAK.[L]		1	RecPY14His	RecPY14His	0	3	1	0	1	1	529.925	1587.76	1587.76	0.38	0.0002	HCD (High Energy Collision Dissociation)	MS2	3.18481	200	60.6936	18170	PY14_257_109481_P14_A725_20201216_1.raw	F1	2.27		1
		FALSE	High	Sequest HT (A3)	Unambiguous	[K].DEANRPDTTEAGLAK.[L]		1	RecPY14His	RecPY14His	0	2	1	0	1	1	794.384	1587.76	1587.76	-0.69	-0.00055	HCD (High Energy Collision Dissociation)	MS2	47.1461	200	51.8378	16125	PY14_257_109481_P14_A725_20201216_1.raw	F1	1.98		1				16252569	51.78
		FALSE	High	Sequest HT (A3)	Unambiguous	[K].DEANRPDTTEAGLAK.[L]		1	RecPY14His	RecPY14His	0	4	1	0	1	1	397.696	1587.76	1587.76	0.6	0.00024	HCD (High Energy Collision Dissociation)	MS2	8.66676	115.254	13.6062	3019	PY14_273_109186_PY14-20_A725-20200724_3.raw	F2	3.5		1				84991704	13.71
		FALSE	High	Sequest HT (A3)	Unambiguous	[K].DEANRPDTTEAGLAK.[L]		1	RecPY14His	RecPY14His	0	3	1	0	1	1	529.926	1587.76	1587.76	2.23	0.00118	HCD (High Energy Collision Dissociation)	MS2	76.4752	200	39.9366	12823	PY14_257_109481_P14_A725_20201216_1.raw	F1	3.61		1
		FALSE	High	Sequest HT (A3)	Unambiguous	[K].DEANRPDTTEAGLAK.[L]		1	RecPY14His	RecPY14His	0	2	1	0	1	1	794.385	1587.76	1587.76	0.93	0.00074	HCD (High Energy Collision Dissociation)	MS2	21.056	44.203	18.6564	4021	PY14_257_109481_P14_A725_20201216_1.raw	F1	3.23		1				499735328	19.02
		FALSE	High	Sequest HT (A3)	Unambiguous	[K].DEANRPDTTEAGLAK.[L]		1	RecPY14His	RecPY14His	0	3	1	0	1	1	529.925	1587.76	1587.76	-0.08	-4e-05	HCD (High Energy Collision Dissociation)	MS2	0.528733	4.092	18.6219	4009	PY14_257_109481_P14_A725_20201216_1.raw	F1	3.72		1
		FALSE	High	Sequest HT (A3)	Unambiguous	[K].DEANRPDTTEAGLAK.[L]		1	RecPY14His	RecPY14His	0	3	1	0	1	1	529.927	1587.77	1587.76	2.8	0.00148	HCD (High Energy Collision Dissociation)	MS2	57.2426	84.962	21.821	6196	PY14_273_109186_PY14-20_A725-20200724_3.raw	F2	2.39		1				219520176	22.13
		FALSE	Medium	Sequest HT (A3)	Unambiguous	[K].DEANRPDTTEAGLAK.[L]		1	RecPY14His	RecPY14His	0	3	1	0	1	1	529.925	1587.76	1587.76	0.5	0.00026	HCD (High Energy Collision Dissociation)	MS2	0	200	67.6732	19608	PY14_257_109481_P14_A725_20201216_1.raw	F1	2.1		1
		FALSE	High	Mascot (A5)	Unambiguous	[K].DEANRPDTTEAGLAK.[L]		1	RecPY14His	RecPY14His	0	3	1	0	1	1	529.925	1587.76	1587.76	-0.08	-4e-05	HCD (High Energy Collision Dissociation)	MS2	8.22226	200	53.3353	16045	PY14_273_109186_PY14-20_A725-20200724_3.raw	F2		22	1	13	13	0.00134896	54197104	53.87
		FALSE	High	Mascot (A5)	Unambiguous	[K].DEANRPDTTEAGLAK.[L]		1	RecPY14His	RecPY14His	0	2	1	0	1	1	794.383	1587.76	1587.76	-0.76	-0.00061	HCD (High Energy Collision Dissociation)	MS2	0.181723	0.069	13.6705	3043	PY14_273_109186_PY14-20_A725-20200724_3.raw	F2		80	1	13	13	2.11836e-09	125439172608	13.71
		FALSE	High	Sequest HT (A3)	Unambiguous	[K].DEANRPDTTEAGLAK.[L]		1	RecPY14His	RecPY14His	0	2	1	0	1	1	794.384	1587.76	1587.76	-0.07	-6e-05	HCD (High Energy Collision Dissociation)	MS2	6.74514	22.84	18.3874	3932	PY14_257_109481_P14_A725_20201216_1.raw	F1	3.46		1				174257668096	16.23
		FALSE	High	Mascot (A5)	Unambiguous	[K].DEANRPDTTEAGLAK.[L]		1	RecPY14His	RecPY14His	0	3	1	0	1	1	529.924	1587.76	1587.76	-1.81	-0.00096	HCD (High Energy Collision Dissociation)	MS2	67.1911	200	38.6536	12378	PY14_257_109481_P14_A725_20201216_1.raw	F1		18	1	13	13	0.00331894	26571876	38.96
		FALSE	High	Sequest HT (A3)	Unambiguous	[K].DEANRPDTTEAGLAK.[L]		1	RecPY14His	RecPY14His	0	3	1	0	1	1	529.925	1587.76	1587.76	-0.2	-0.0001	HCD (High Energy Collision Dissociation)	MS2	1.15466	3.671	18.3524	3921	PY14_257_109481_P14_A725_20201216_1.raw	F1	3.36		1				387694788608	16.23
		FALSE	High	Mascot (A5)	Unambiguous	[K].DEANRPDTTEAGLAK.[L]		1	RecPY14His	RecPY14His	0	3	1	0	1	1	529.924	1587.76	1587.76	-1.81	-0.00096	HCD (High Energy Collision Dissociation)	MS2	0.259613	1.141	17.2484	3558	PY14_257_109481_P14_A725_20201216_1.raw	F1		42	1	13	13	1.1695e-05	387694788608	16.23
		FALSE	High	Sequest HT (A3)	Unambiguous	[K].DEANRPDTTEAGLAK.[L]		1	RecPY14His	RecPY14His	0	3	1	0	1	1	529.925	1587.76	1587.76	0.27	0.00014	HCD (High Energy Collision Dissociation)	MS2	3.61442	200	58.8918	17783	PY14_257_109481_P14_A725_20201216_1.raw	F1	2.55		1				432200	58.84
		FALSE	High	Sequest HT (A3)	Unambiguous	[K].DEANRPDTTEAGLAK.[L]		1	RecPY14His	RecPY14His	0	3	1	0	1	1	529.925	1587.76	1587.76	0.5	0.00026	HCD (High Energy Collision Dissociation)	MS2	1.39492	200	67.9316	19659	PY14_257_109481_P14_A725_20201216_1.raw	F1	2.3		1				74883.3	68.06
		FALSE	High	Mascot (A5)	Unambiguous	[K].DEANRPDTTEAGLAK.[L]		1	RecPY14His	RecPY14His	0	2	1	0	1	1	794.383	1587.76	1587.76	-1.84	-0.00146	HCD (High Energy Collision Dissociation)	MS2	8.37458	66.785	15.8846	3817	PY14_273_109186_PY14-20_A725-20200724_3.raw	F2		70	1	13	13	2.04644e-08	497934592	16.19
		FALSE	High	Sequest HT (A3)	Unambiguous	[K].DEANRPDTTEAGLAK.[L]		1	RecPY14His	RecPY14His	0	3	1	0	1	1	529.924	1587.76	1587.76	-1.23	-0.00065	HCD (High Energy Collision Dissociation)	MS2	0.232181	0.571	16.962	3471	PY14_257_109481_P14_A725_20201216_1.raw	F1	3.33		1				387694788608	16.23
		FALSE	High	Mascot (A5)	Unambiguous	[K].DEANRPDTTEAGLAK.[L]		1	RecPY14His	RecPY14His	0	2	1	0	1	1	794.384	1587.76	1587.76	-0.69	-0.00055	HCD (High Energy Collision Dissociation)	MS2	20.5243	117.487	17.2661	4342	PY14_273_109186_PY14-20_A725-20200724_3.raw	F2		87	1	13	13	4.40555e-10	236274032	17.93
		FALSE	High	Sequest HT (A3)	Unambiguous	[K].DEANRPDTTEAGLAK.[L]		1	RecPY14His	RecPY14His	0	2	1	0	1	1	794.385	1587.76	1587.76	0.54	0.00043	HCD (High Energy Collision Dissociation)	MS2	0.289914	0.789	16.7211	3393	PY14_257_109481_P14_A725_20201216_1.raw	F1	4.16		1				174257668096	16.23
		FALSE	High	Mascot (A5)	Unambiguous	[K].DEANRPDTTEAGLAK.[L]		1	RecPY14His	RecPY14His	0	3	1	0	1	1	529.925	1587.76	1587.76	-0.08	-4e-05	HCD (High Energy Collision Dissociation)	MS2	3.29422	200	38.0504	12143	PY14_273_109186_PY14-20_A725-20200724_3.raw	F2		47	1	13	13	4.02717e-06	28984758	37.91
		FALSE	High	Sequest HT (A3)	Unambiguous	[K].DEANRPDTTEAGLAK.[L]		1	RecPY14His	RecPY14His	0	3	1	0	1	1	529.927	1587.77	1587.76	4.3	0.00228	HCD (High Energy Collision Dissociation)	MS2	0.510573	0.224	16.6891	3382	PY14_257_109481_P14_A725_20201216_1.raw	F1	3.26		1				387694788608	16.23
		FALSE	High	Mascot (A5)	Unambiguous	[K].DEANRPDTTEAGLAK.[L]		1	RecPY14His	RecPY14His	0	3	1	0	1	1	529.924	1587.76	1587.76	-1.81	-0.00096	HCD (High Energy Collision Dissociation)	MS2	3.51527	12.332	18.0605	4658	PY14_273_109186_PY14-20_A725-20200724_3.raw	F2		41	1	13	13	1.57036e-05	1479720064	17.95
		FALSE	High	Sequest HT (A3)	Unambiguous	[K].DEANRPDTTEAGLAK.[L]		1	RecPY14His	RecPY14His	0	2	1	0	1	1	794.383	1587.76	1587.76	-1.23	-0.00097	HCD (High Energy Collision Dissociation)	MS2	24.4874	139.71	22.1489	5367	PY14_257_109481_P14_A725_20201216_1.raw	F1	3.69		1				211709808	21.73
		FALSE	High	Sequest HT (A3)	Unambiguous	[K].DEANRPDTTEAGLAK.[L]		1	RecPY14His	RecPY14His	0	3	1	0	1	1	529.925	1587.76	1587.76	0.27	0.00014	HCD (High Energy Collision Dissociation)	MS2	3.02947	200	59.4097	17895	PY14_257_109481_P14_A725_20201216_1.raw	F1	2.36		1				677800	59.32
		FALSE	Medium	Sequest HT (A3)	Unambiguous	[K].DEANRPDTTEAGLAK.[L]		1	RecPY14His	RecPY14His	0	3	1	0	1	1	529.926	1587.76	1587.76	1.3	0.00069	HCD (High Energy Collision Dissociation)	MS2	13.9836	47.937	22.6446	6523	PY14_273_109186_PY14-20_A725-20200724_3.raw	F2	2.11		1
		FALSE	High	Sequest HT (A3)	Unambiguous	[K].DEANRPDTTEAGLAK.[L]		1	RecPY14His	RecPY14His	0	2	1	0	1	1	794.383	1587.76	1587.76	-0.84	-0.00067	HCD (High Energy Collision Dissociation)	MS2	0.15955	0.457	16.4473	3306	PY14_257_109481_P14_A725_20201216_1.raw	F1	4.25		1				174257668096	16.23
		FALSE	High	Sequest HT (A3)	Unambiguous	[K].DEANRPDTTEAGLAK.[L]		1	RecPY14His	RecPY14His	0	3	1	0	1	1	529.927	1587.77	1587.76	3.38	0.00179	HCD (High Energy Collision Dissociation)	MS2	0.260096	0.065	16.427	3298	PY14_257_109481_P14_A725_20201216_1.raw	F1	2.91		1				387694788608	16.23
		FALSE	High	Mascot (A5)	Unambiguous	[K].DEANRPDTTEAGLAK.[L]		1	RecPY14His	RecPY14His	0	2	1	0	1	1	794.384	1587.76	1587.76	-0.69	-0.00055	HCD (High Energy Collision Dissociation)	MS2	47.1461	200	51.8378	16125	PY14_257_109481_P14_A725_20201216_1.raw	F1		42	1	13	13	1.2942e-05	16252569	51.78
		FALSE	High	Sequest HT (A3)	Unambiguous	[K].DEANRPDTTEAGLAK.[L]		1	RecPY14His	RecPY14His	0	2	1	0	1	1	794.383	1587.76	1587.76	-1.53	-0.00122	HCD (High Energy Collision Dissociation)	MS2	0.0716565	0.042	16.1771	3217	PY14_257_109481_P14_A725_20201216_1.raw	F1	4.66		1				174257668096	16.23
		FALSE	High	Sequest HT (A3)	Unambiguous	[K].DEANRPDTTEAGLAK.[L]		1	RecPY14His	RecPY14His	0	3	1	0	1	1	529.926	1587.76	1587.76	1.76	0.00093	HCD (High Energy Collision Dissociation)	MS2	0.115784	0.03	16.1703	3215	PY14_257_109481_P14_A725_20201216_1.raw	F1	3.48		1				387694788608	16.23
		FALSE	Medium	Sequest HT (A3)	Unambiguous	[K].DEANRPDTTEAGLAK.[L]		1	RecPY14His	RecPY14His	0	3	1	0	1	1	529.925	1587.76	1587.76	0.38	0.0002	HCD (High Energy Collision Dissociation)	MS2	4.3006	200	59.1538	17840	PY14_257_109481_P14_A725_20201216_1.raw	F1	2.28		1
		FALSE	High	Mascot (A5)	Unambiguous	[K].DEANRPDTTEAGLAK.[L]		1	RecPY14His	RecPY14His	0	2	1	0	1	1	794.383	1587.76	1587.76	-1.84	-0.00146	HCD (High Energy Collision Dissociation)	MS2	16.162	200	53.0402	16439	PY14_257_109481_P14_A725_20201216_1.raw	F1		20	1	13	13	0.0021727	22674696	53.58
		FALSE	High	Mascot (A5)	Unambiguous	[K].DEANRPDTTEAGLAK.[L]		1	RecPY14His	RecPY14His	0	3	1	0	1	1	529.925	1587.76	1587.76	-0.08	-4e-05	HCD (High Energy Collision Dissociation)	MS2	4.81004	151.481	35.2548	11245	PY14_273_109186_PY14-20_A725-20200724_3.raw	F2		32	1	13	13	0.000125314	65576612	35.22
		FALSE	Medium	Sequest HT (A3)	Unambiguous	[K].DEANRPDTTEAGLAK.[L]		1	RecPY14His	RecPY14His	0	3	1	0	1	1	529.926	1587.76	1587.76	1.42	0.00075	HCD (High Energy Collision Dissociation)	MS2	26.1841	47.527	22.3765	6426	PY14_273_109186_PY14-20_A725-20200724_3.raw	F2	2.07		1
		FALSE	High	Sequest HT (A3)	Unambiguous	[K].DEANRPDTTEAGLAK.[L]		1	RecPY14His	RecPY14His	0	2	1	0	1	1	794.386	1587.76	1587.76	2	0.00159	HCD (High Energy Collision Dissociation)	MS2	37.3152	200	45.9521	14683	PY14_257_109481_P14_A725_20201216_1.raw	F1	2.1		1				9017439	45.99
		FALSE	High	Sequest HT (A3)	Unambiguous	[K].DEANRPDTTEAGLAK.[L]		1	RecPY14His	RecPY14His	0	2	1	0	1	1	794.382	1587.76	1587.76	-3.07	-0.00244	HCD (High Energy Collision Dissociation)	MS2	0.906054	6.345	16.9994	3482	PY14_257_109481_P14_A725_20201216_1.raw	F1	4.11		1				174257668096	16.23
		FALSE	High	Sequest HT (A3)	Unambiguous	[K].DEANRPDTTEAGLAK.[L]		1	RecPY14His	RecPY14His	0	3	1	0	1	1	529.926	1587.76	1587.76	2	0.00106	HCD (High Energy Collision Dissociation)	MS2	27.6808	91.21	22.0956	6317	PY14_273_109186_PY14-20_A725-20200724_3.raw	F2	2.8		1				219520176	22.13
		FALSE	High	Sequest HT (A3)	Unambiguous	[K].DEANRPDTTEAGLAK.[L]		1	RecPY14His	RecPY14His	0	3	1	0	1	1	529.925	1587.76	1587.76	0.38	0.0002	HCD (High Energy Collision Dissociation)	MS2	2.22019	200	52.8951	16402	PY14_257_109481_P14_A725_20201216_1.raw	F1	3.41		1				199217904	53.73
		FALSE	High	Mascot (A5)	Unambiguous	[K].DEANRPDTTEAGLAK.[L]		1	RecPY14His	RecPY14His	0	3	1	0	1	1	529.924	1587.76	1587.76	-1.69	-0.0009	HCD (High Energy Collision Dissociation)	MS2	9.59897	11.119	21.1707	4960	PY14_257_109481_P14_A725_20201216_1.raw	F1		39	1	13	13	2.63027e-05	1008686912	20.8
		FALSE	Medium	Sequest HT (A3)	Unambiguous	[K].DEANRPDTTEAGLAK.[L]		1	RecPY14His	RecPY14His	0	3	1	0	1	1	529.924	1587.76	1587.76	-2.73	-0.00145	HCD (High Energy Collision Dissociation)	MS2	0.310678	0.39	14.7793	3430	PY14_273_109186_PY14-20_A725-20200724_3.raw	F2	1.8		1
		FALSE	High	Sequest HT (A3)	Unambiguous	[K].DEANRPDTTEAGLAK.[L]		1	RecPY14His	RecPY14His	0	3	1	0	1	1	529.925	1587.76	1587.76	0.38	0.0002	HCD (High Energy Collision Dissociation)	MS2	6.03997	200	52.6351	16334	PY14_257_109481_P14_A725_20201216_1.raw	F1	3.64		1				106340992	51.82
		FALSE	High	Mascot (A5)	Unambiguous	[K].DEANRPDTTEAGLAK.[L]		1	RecPY14His	RecPY14His	0	3	1	0	1	1	529.925	1587.76	1587.76	-0.89	-0.00047	HCD (High Energy Collision Dissociation)	MS2	3.05707	19.561	19.6114	5269	PY14_273_109186_PY14-20_A725-20200724_3.raw	F2		41	1	13	13	1.4388e-05	1059586176	19.32
		FALSE	High	Sequest HT (A3)	Unambiguous	[K].DEANRPDTTEAGLAK.[L]		1	RecPY14His	RecPY14His	0	2	1	0	1	1	794.383	1587.76	1587.76	-1.46	-0.00116	HCD (High Energy Collision Dissociation)	MS2	0	19.732	15.0335	3518	PY14_273_109186_PY14-20_A725-20200724_3.raw	F2	2.6		1				3062827776	14.74
		FALSE	High	Mascot (A5)	Unambiguous	[K].DEANRPDTTEAGLAK.[L]		1	RecPY14His	RecPY14His	0	2	1	0	1	1	794.383	1587.76	1587.76	-0.84	-0.00067	HCD (High Energy Collision Dissociation)	MS2	0.15955	0.457	16.4473	3306	PY14_257_109481_P14_A725_20201216_1.raw	F1		77	1	13	13	3.65595e-09	174257668096	16.23
		FALSE	High	Sequest HT (A3)	Unambiguous	[K].DEANRPDTTEAGLAK.[L]		1	RecPY14His	RecPY14His	0	3	1	0	1	1	529.924	1587.76	1587.76	-1.69	-0.0009	HCD (High Energy Collision Dissociation)	MS2	0	11.146	17.2395	4332	PY14_273_109186_PY14-20_A725-20200724_3.raw	F2	2.35		1				1479720064	17.95
		FALSE	High	Sequest HT (A3)	Unambiguous	[K].DEANRPDTTEAGLAK.[L]		1	RecPY14His	RecPY14His	0	2	1	0	1	1	794.384	1587.76	1587.76	-0.69	-0.00055	HCD (High Energy Collision Dissociation)	MS2	20.5243	117.487	17.2661	4342	PY14_273_109186_PY14-20_A725-20200724_3.raw	F2	3.04		1				236274032	17.93
		FALSE	High	Mascot (A5)	Unambiguous	[K].DEANRPDTTEAGLAK.[L]		1	RecPY14His	RecPY14His	0	2	1	0	1	1	794.383	1587.76	1587.76	-1.15	-0.00091	HCD (High Energy Collision Dissociation)	MS2	0	20.772	17.5517	3658	PY14_257_109481_P14_A725_20201216_1.raw	F1		82	1	13	13	1.25893e-09	174257668096	16.23
		FALSE	High	Mascot (A5)	Unambiguous	[K].DEANRPDTTEAGLAK.[L]		1	RecPY14His	RecPY14His	0	3	1	0	1	1	529.925	1587.76	1587.76	-0.31	-0.00016	HCD (High Energy Collision Dissociation)	MS2	0	200	33.8838	10800	PY14_273_109186_PY14-20_A725-20200724_3.raw	F2		30	1	13	13	0.000217771
		FALSE	High	Sequest HT (A3)	Unambiguous	[K].DEANRPDTTEAGLAK.[L]		1	RecPY14His	RecPY14His	0	3	1	0	1	1	529.925	1587.76	1587.76	0.5	0.00026	HCD (High Energy Collision Dissociation)	MS2	2.23576	200	64.843	19029	PY14_257_109481_P14_A725_20201216_1.raw	F1	2.46		1				152781	64.44
		FALSE	Medium	Sequest HT (A3)	Unambiguous	[K].DEANRPDTTEAGLAK.[L]		1	RecPY14His	RecPY14His	0	2	1	0	1	1	794.383	1587.76	1587.76	-0.99	-0.00079	HCD (High Energy Collision Dissociation)	MS2	20.4848	200	52.4815	16294	PY14_257_109481_P14_A725_20201216_1.raw	F1	1.29		1
		FALSE	High	Sequest HT (A3)	Unambiguous	[K].DEANRPDTTEAGLAK.[L]		1	RecPY14His	RecPY14His	0	3	1	0	1	1	529.924	1587.76	1587.76	-2.96	-0.00157	HCD (High Energy Collision Dissociation)	MS2	0	129.01	17.5103	4438	PY14_273_109186_PY14-20_A725-20200724_3.raw	F2	3.54		1				1479720064	17.95
		FALSE	High	Sequest HT (A3)	Unambiguous	[K].DEANRPDTTEAGLAK.[L]		1	RecPY14His	RecPY14His	0	3	1	0	1	1	529.923	1587.76	1587.76	-3.31	-0.00175	HCD (High Energy Collision Dissociation)	MS2	0	25.573	17.5168	4440	PY14_273_109186_PY14-20_A725-20200724_3.raw	F2	2.61		1				1479720064	17.95
		FALSE	High	Sequest HT (A3)	Unambiguous	[K].DEANRPDTTEAGLAK.[L]		1	RecPY14His	RecPY14His	0	2	1	0	1	1	794.383	1587.76	1587.76	-1.38	-0.00109	HCD (High Energy Collision Dissociation)	MS2	28.8651	200	52.7517	16364	PY14_257_109481_P14_A725_20201216_1.raw	F1	1.98		1				22674696	53.58
		FALSE	High	Mascot (A5)	Unambiguous	[K].DEANRPDTTEAGLAK.[L]		1	RecPY14His	RecPY14His	0	2	1	0	1	1	794.383	1587.76	1587.76	-1.23	-0.00097	HCD (High Energy Collision Dissociation)	MS2	12.609	177.602	24.8142	6533	PY14_257_109481_P14_A725_20201216_1.raw	F1		49	1	13	13	2.30675e-06	115430408	24.53
		FALSE	High	Mascot (A5)	Unambiguous	[K].DEANRPDTTEAGLAK.[L]		1	RecPY14His	RecPY14His	0	3	1	0	1	1	529.925	1587.76	1587.76	-0.43	-0.00023	HCD (High Energy Collision Dissociation)	MS2	18.6437	9.107	20.9123	4849	PY14_257_109481_P14_A725_20201216_1.raw	F1		37	1	13	13	4.03645e-05	1008686912	20.8
		FALSE	High	Mascot (A5)	Unambiguous	[K].DEANRPDTTEAGLAK.[L]		1	RecPY14His	RecPY14His	0	2	1	0	1	1	794.384	1587.76	1587.76	-0.53	-0.00042	HCD (High Energy Collision Dissociation)	MS2	18.5231	200	47.4967	15117	PY14_257_109481_P14_A725_20201216_1.raw	F1		15	1	13	13	0.00606736	8.23308e+06	47.87
		FALSE	High	Mascot (A5)	Unambiguous	[K].DEANRPDTTEAGLAK.[L]		1	RecPY14His	RecPY14His	0	2	1	0	1	1	794.383	1587.76	1587.76	-1.23	-0.00097	HCD (High Energy Collision Dissociation)	MS2	24.4874	139.71	22.1489	5367	PY14_257_109481_P14_A725_20201216_1.raw	F1		58	1	13	13	3.31131e-07	211709808	21.73
		FALSE	High	Mascot (A5)	Unambiguous	[K].DEANRPDTTEAGLAK.[L]		1	RecPY14His	RecPY14His	0	2	1	0	1	1	794.383	1587.76	1587.76	-0.84	-0.00067	HCD (High Energy Collision Dissociation)	MS2	24.7186	107.392	21.106	5894	PY14_273_109186_PY14-20_A725-20200724_3.raw	F2		15	1	13	13	0.00598412	50077172	21.01
		FALSE	High	Sequest HT (A3)	Unambiguous	[K].DEANRPDTTEAGLAK.[L]		1	RecPY14His	RecPY14His	0	3	1	0	1	1	529.924	1587.76	1587.76	-1.58	-0.00084	HCD (High Energy Collision Dissociation)	MS2	0	12.129	17.7892	4552	PY14_273_109186_PY14-20_A725-20200724_3.raw	F2	2.48		1				1479720064	17.95
		FALSE	High	Mascot (A5)	Unambiguous	[K].DEANRPDTTEAGLAK.[L]		1	RecPY14His	RecPY14His	0	3	1	0	1	1	529.925	1587.76	1587.76	-0.43	-0.00023	HCD (High Energy Collision Dissociation)	MS2	0.849479	2.265	15.0647	3529	PY14_273_109186_PY14-20_A725-20200724_3.raw	F2		38	1	13	13	3.14775e-05	361876586496	13.71
		FALSE	High	Mascot (A5)	Unambiguous	[K].DEANRPDTTEAGLAK.[L]		1	RecPY14His	RecPY14His	0	3	1	0	1	1	529.924	1587.76	1587.76	-1.69	-0.0009	HCD (High Energy Collision Dissociation)	MS2	30.9454	200	40.2392	12919	PY14_257_109481_P14_A725_20201216_1.raw	F1		31	1	13	13	0.000152757	31949408	40.62
		FALSE	High	Sequest HT (A3)	Unambiguous	[K].DEANRPDTTEAGLAK.[L]		1	RecPY14His	RecPY14His	0	3	1	0	1	1	529.925	1587.76	1587.76	-0.77	-0.00041	HCD (High Energy Collision Dissociation)	MS2	0.599401	2.627	18.0696	3822	PY14_257_109481_P14_A725_20201216_1.raw	F1	2.79		1				387694788608	16.23
		FALSE	High	Mascot (A5)	Unambiguous	[K].DEANRPDTTEAGLAK.[L]		1	RecPY14His	RecPY14His	0	3	1	0	1	1	529.925	1587.76	1587.76	-0.08	-4e-05	HCD (High Energy Collision Dissociation)	MS2	14.7232	200	46.5492	14400	PY14_273_109186_PY14-20_A725-20200724_3.raw	F2		19	1	13	13	0.00245471	14361040	46.63
		FALSE	High	Sequest HT (A3)	Unambiguous	[K].DEANRPDTTEAGLAK.[L]		1	RecPY14His	RecPY14His	0	2	1	0	1	1	794.383	1587.76	1587.76	-1.07	-0.00085	HCD (High Energy Collision Dissociation)	MS2	0.600013	26.375	17.8401	3746	PY14_257_109481_P14_A725_20201216_1.raw	F1	4.16		1				174257668096	16.23
		FALSE	Medium	Sequest HT (A3)	Selected	[K].DEANRPDTTEAGLAK.[L]		1	RecPY14His	RecPY14His	0	3	1	0	1	1	529.926	1587.76	1587.76	1.07	0.00057	HCD (High Energy Collision Dissociation)	MS2	59.8098	200	13.9677	2610	PY14_257_109481_P14_A725_20201216_1.raw	F1	1.21		1
		FALSE	Medium	Sequest HT (A3)	Unambiguous	[K].DEANRPDTTEAGLAK.[L]		1	RecPY14His	RecPY14His	0	2	1	0	1	1	794.383	1587.76	1587.76	-1.07	-0.00085	HCD (High Energy Collision Dissociation)	MS2	23.5725	200	54.9084	16911	PY14_257_109481_P14_A725_20201216_1.raw	F1	1.43		1
		FALSE	High	Mascot (A5)	Unambiguous	[K].DEANRPDTTEAGLAK.[L]		1	RecPY14His	RecPY14His	0	2	1	0	1	1	794.384	1587.76	1587.76	-0.07	-6e-05	HCD (High Energy Collision Dissociation)	MS2	6.74514	22.84	18.3874	3932	PY14_257_109481_P14_A725_20201216_1.raw	F1		81	1	13	13	1.47911e-09	174257668096	16.23
		FALSE	High	Mascot (A5)	Unambiguous	[K].DEANRPDTTEAGLAK.[L]		1	RecPY14His	RecPY14His	0	3	1	0	1	1	529.925	1587.76	1587.76	-0.66	-0.00035	HCD (High Energy Collision Dissociation)	MS2	50.0212	90.492	29.242	8555	PY14_257_109481_P14_A725_20201216_1.raw	F1		37	1	13	13	3.81944e-05
		FALSE	Medium	Sequest HT (A3)	Selected	[K].DEANRPDTTEAGLAK.[L]		1	RecPY14His	RecPY14His	0	4	1	0	1	1	397.695	1587.76	1587.76	-1.4	-0.00055	HCD (High Energy Collision Dissociation)	MS2	13.9519	200	13.5314	2507	PY14_257_109481_P14_A725_20201216_1.raw	F1	1.59		1
		FALSE	Medium	Sequest HT (A3)	Unambiguous	[K].DEANRPDTTEAGLAK.[L]		1	RecPY14His	RecPY14His	0	3	1	0	1	1	529.925	1587.76	1587.76	0.38	0.0002	HCD (High Energy Collision Dissociation)	MS2	0	200	13.5197	2504	PY14_257_109481_P14_A725_20201216_1.raw	F1	1.28		1
		FALSE	High	Sequest HT (A3)	Unambiguous	[K].DEANRPDTTEAGLAK.[L]		1	RecPY14His	RecPY14His	0	3	1	0	1	1	529.925	1587.76	1587.76	0.38	0.0002	HCD (High Energy Collision Dissociation)	MS2	3.25062	200	58.3741	17670	PY14_257_109481_P14_A725_20201216_1.raw	F1	2.34		1				271766	58.5
		FALSE	Medium	Sequest HT (A3)	Unambiguous	[K].DEANRPDTTEAGLAK.[L]		1	RecPY14His	RecPY14His	0	3	1	0	1	1	529.924	1587.76	1587.76	-2.04	-0.00108	HCD (High Energy Collision Dissociation)	MS2	30.8547	58.106	23.573	6890	PY14_273_109186_PY14-20_A725-20200724_3.raw	F2	1.97		1
		FALSE	High	Sequest HT (A3)	Unambiguous	[K].DEANRPDTTEAGLAK.[L]		1	RecPY14His	RecPY14His	0	2	1	0	1	1	794.383	1587.76	1587.76	-1.53	-0.00122	HCD (High Energy Collision Dissociation)	MS2	0	200	13.4081	2946	PY14_273_109186_PY14-20_A725-20200724_3.raw	F2	3.61		1				125439172608	13.71
		FALSE	High	Sequest HT (A3)	Unambiguous	[K].DEANRPDTTEAGLAK.[L]		1	RecPY14His	RecPY14His	0	2	1	0	1	1	794.383	1587.76	1587.76	-1.84	-0.00146	HCD (High Energy Collision Dissociation)	MS2	16.162	200	53.0402	16439	PY14_257_109481_P14_A725_20201216_1.raw	F1	2.37		1				22674696	53.58
		FALSE	High	Sequest HT (A3)	Unambiguous	[K].DEANRPDTTEAGLAK.[L]		1	RecPY14His	RecPY14His	0	3	1	0	1	1	529.925	1587.76	1587.76	-0.77	-0.00041	HCD (High Energy Collision Dissociation)	MS2	6.69568	24.522	24.6099	6453	PY14_257_109481_P14_A725_20201216_1.raw	F1	3.47		1				556389760	24.62
		FALSE	Medium	Sequest HT (A3)	Unambiguous	[K].DEANRPDTTEAGLAK.[L]		1	RecPY14His	RecPY14His	0	3	1	0	1	1	529.925	1587.76	1587.76	-0.08	-4e-05	HCD (High Energy Collision Dissociation)	MS2	5.2393	200	39.7931	12615	PY14_273_109186_PY14-20_A725-20200724_3.raw	F2	1.8		1
		FALSE	High	Sequest HT (A3)	Unambiguous	[K].DEANRPDTTEAGLAK.[L]		1	RecPY14His	RecPY14His	0	3	1	0	1	1	529.925	1587.76	1587.76	0.5	0.00026	HCD (High Energy Collision Dissociation)	MS2	1.51554	8.221	15.656	3055	PY14_257_109481_P14_A725_20201216_1.raw	F1	4.08		1				387694788608	16.23
		FALSE	High	Sequest HT (A3)	Unambiguous	[K].DEANRPDTTEAGLAK.[L]		1	RecPY14His	RecPY14His	0	2	1	0	1	1	794.384	1587.76	1587.76	-0.23	-0.00018	HCD (High Energy Collision Dissociation)	MS2	4.69466	200	15.6261	3047	PY14_257_109481_P14_A725_20201216_1.raw	F1	4.5		1				174257668096	16.23
		FALSE	Medium	Sequest HT (A3)	Unambiguous	[K].DEANRPDTTEAGLAK.[L]		1	RecPY14His	RecPY14His	0	3	1	0	1	1	529.925	1587.76	1587.76	-0.08	-4e-05	HCD (High Energy Collision Dissociation)	MS2	53.0162	61.826	42.9089	13757	PY14_257_109481_P14_A725_20201216_1.raw	F1	1.19		1
		FALSE	Medium	Sequest HT (A3)	Unambiguous	[K].DEANRPDTTEAGLAK.[L]		1	RecPY14His	RecPY14His	0	3	1	0	1	1	529.925	1587.76	1587.76	0.5	0.00026	HCD (High Energy Collision Dissociation)	MS2	2.03442	200	68.4454	19763	PY14_257_109481_P14_A725_20201216_1.raw	F1	2.12		1
		FALSE	Medium	Sequest HT (A3)	Unambiguous	[K].DEANRPDTTEAGLAK.[L]		1	RecPY14His	RecPY14His	0	3	1	0	1	1	529.925	1587.76	1587.76	0.27	0.00014	HCD (High Energy Collision Dissociation)	MS2	1.59034	200	68.1899	19712	PY14_257_109481_P14_A725_20201216_1.raw	F1	2.27		1
		FALSE	High	Mascot (A5)	Unambiguous	[K].DEANRPDTTEAGLAK.[L]		1	RecPY14His	RecPY14His	0	3	1	0	1	1	529.925	1587.76	1587.76	-0.08	-4e-05	HCD (High Energy Collision Dissociation)	MS2	14.2639	135.784	35.614	11143	PY14_257_109481_P14_A725_20201216_1.raw	F1		26	1	13	13	0.0005188	70653816	35.47
		FALSE	High	Mascot (A5)	Unambiguous	[K].DEANRPDTTEAGLAK.[L]		1	RecPY14His	RecPY14His	0	3	1	0	1	1	529.925	1587.76	1587.76	-0.66	-0.00035	HCD (High Energy Collision Dissociation)	MS2	3.58135	182.945	31.2174	9888	PY14_273_109186_PY14-20_A725-20200724_3.raw	F2		39	1	13	13	2.25944e-05	114802552	30.91
		FALSE	High	Sequest HT (A3)	Unambiguous	[K].DEANRPDTTEAGLAK.[L]		1	RecPY14His	RecPY14His	0	3	1	0	1	1	529.925	1587.76	1587.76	0.38	0.0002	HCD (High Energy Collision Dissociation)	MS2	1.50476	200	59.6615	17949	PY14_257_109481_P14_A725_20201216_1.raw	F1	2.7		1				297643	59.87
		FALSE	High	Sequest HT (A3)	Unambiguous	[K].DEANRPDTTEAGLAK.[L]		1	RecPY14His	RecPY14His	0	3	1	0	1	1	529.925	1587.76	1587.76	0.03	2e-05	HCD (High Energy Collision Dissociation)	MS2	8.26696	30.923	24.3357	6342	PY14_257_109481_P14_A725_20201216_1.raw	F1	3.01		1				556389760	24.62
		FALSE	High	Sequest HT (A3)	Unambiguous	[K].DEANRPDTTEAGLAK.[L]		1	RecPY14His	RecPY14His	0	3	1	0	1	1	529.925	1587.76	1587.76	0.27	0.00014	HCD (High Energy Collision Dissociation)	MS2	2.16932	200	54.7709	16881	PY14_257_109481_P14_A725_20201216_1.raw	F1	3.01		1				4406837	54.73
		FALSE	High	Sequest HT (A3)	Unambiguous	[K].DEANRPDTTEAGLAK.[L]		1	RecPY14His	RecPY14His	0	3	1	0	1	1	529.925	1587.76	1587.76	0.5	0.00026	HCD (High Energy Collision Dissociation)	MS2	0.408701	2.327	17.8073	3734	PY14_257_109481_P14_A725_20201216_1.raw	F1	3.02		1				387694788608	16.23
		FALSE	Medium	Sequest HT (A3)	Unambiguous	[K].DEANRPDTTEAGLAK.[L]		1	RecPY14His	RecPY14His	0	3	1	0	1	1	529.925	1587.76	1587.76	0.61	0.00032	HCD (High Energy Collision Dissociation)	MS2	0	200	68.9608	19867	PY14_257_109481_P14_A725_20201216_1.raw	F1	2.18		1
		FALSE	High	Sequest HT (A3)	Unambiguous	[K].DEANRPDTTEAGLAK.[L]		1	RecPY14His	RecPY14His	0	2	1	0	1	1	794.382	1587.76	1587.76	-3.15	-0.0025	HCD (High Energy Collision Dissociation)	MS2	17.9784	144.304	24.3801	6361	PY14_257_109481_P14_A725_20201216_1.raw	F1	2.72		1				115430408	24.53
		FALSE	High	Sequest HT (A3)	Unambiguous	[K].DEANRPDTTEAGLAK.[L]		1	RecPY14His	RecPY14His	0	2	1	0	1	1	794.383	1587.76	1587.76	-1.15	-0.00091	HCD (High Energy Collision Dissociation)	MS2	0	20.772	17.5517	3658	PY14_257_109481_P14_A725_20201216_1.raw	F1	3.76		1				174257668096	16.23
		FALSE	High	Mascot (A5)	Unambiguous	[K].DEANRPDTTEAGLAK.[L]		1	RecPY14His	RecPY14His	0	3	1	0	1	1	529.925	1587.76	1587.76	-0.08	-4e-05	HCD (High Energy Collision Dissociation)	MS2	5.2393	200	39.7931	12615	PY14_273_109186_PY14-20_A725-20200724_3.raw	F2		21	1	13	13	0.00145881	49712240	39.82
		FALSE	High	Sequest HT (A3)	Unambiguous	[K].DEANRPDTTEAGLAK.[L]		1	RecPY14His	RecPY14His	0	3	1	0	1	1	529.925	1587.76	1587.76	-0.31	-0.00016	HCD (High Energy Collision Dissociation)	MS2	0.467755	1.688	17.5198	3646	PY14_257_109481_P14_A725_20201216_1.raw	F1	2.55		1				387694788608	16.23
		FALSE	Medium	Sequest HT (A3)	Unambiguous	[K].DEANRPDTTEAGLAK.[L]		1	RecPY14His	RecPY14His	0	2	1	0	1	1	794.382	1587.76	1587.76	-2.38	-0.00189	HCD (High Energy Collision Dissociation)	MS2	0	89.86	17.8983	4596	PY14_273_109186_PY14-20_A725-20200724_3.raw	F2	1.85		1
		FALSE	High	Sequest HT (A3)	Unambiguous	[K].DEANRPDTTEAGLAK.[L]		1	RecPY14His	RecPY14His	0	2	1	0	1	1	794.381	1587.75	1587.76	-3.84	-0.00305	HCD (High Energy Collision Dissociation)	MS2	0	13.19	17.2862	3570	PY14_257_109481_P14_A725_20201216_1.raw	F1	3.65		1				174257668096	16.23
		FALSE	High	Sequest HT (A3)	Unambiguous	[K].DEANRPDTTEAGLAK.[L]		1	RecPY14His	RecPY14His	0	3	1	0	1	1	529.924	1587.76	1587.76	-1.81	-0.00096	HCD (High Energy Collision Dissociation)	MS2	0.259613	1.141	17.2484	3558	PY14_257_109481_P14_A725_20201216_1.raw	F1	2.87		1				387694788608	16.23
		FALSE	High	Sequest HT (A3)	Unambiguous	[K].DEANRPDTTEAGLAK.[L]		1	RecPY14His	RecPY14His	0	3	1	0	1	1	529.926	1587.76	1587.76	0.73	0.00038	HCD (High Energy Collision Dissociation)	MS2	3.26641	200	63.8153	18819	PY14_257_109481_P14_A725_20201216_1.raw	F1	2.98		1				218990	63.83
		FALSE	High	Mascot (A5)	Unambiguous	[K].DEANRPDTTEAGLAK.[L]		1	RecPY14His	RecPY14His	0	3	1	0	1	1	529.925	1587.76	1587.76	-0.08	-4e-05	HCD (High Energy Collision Dissociation)	MS2	10.5356	200	55.5423	17042	PY14_257_109481_P14_A725_20201216_1.raw	F1		48	1	13	13	3.22849e-06	5.06831e+06	55.52
		FALSE	High	Mascot (A5)	Unambiguous	[K].DEANRPDTTEAGLAK.[L]		1	RecPY14His	RecPY14His	0	3	1	0	1	1	529.924	1587.76	1587.76	-1.69	-0.0009	HCD (High Energy Collision Dissociation)	MS2	9.98134	9.323	20.6485	4751	PY14_257_109481_P14_A725_20201216_1.raw	F1		43	1	13	13	1.11429e-05	1012245376	20.37
		FALSE	High	Mascot (A5)	Unambiguous	[K].DEANRPDTTEAGLAK.[L]		1	RecPY14His	RecPY14His	0	3	1	0	1	1	529.925	1587.76	1587.76	-0.08	-4e-05	HCD (High Energy Collision Dissociation)	MS2	0.528733	4.092	18.6219	4009	PY14_257_109481_P14_A725_20201216_1.raw	F1		48	1	13	13	3.155e-06
		FALSE	High	Sequest HT (A3)	Unambiguous	[K].DEANRPDTTEAGLAK.[L]		1	RecPY14His	RecPY14His	0	3	1	0	1	1	529.927	1587.77	1587.76	3.15	0.00167	HCD (High Energy Collision Dissociation)	MS2	0.155854	0.437	15.916	3132	PY14_257_109481_P14_A725_20201216_1.raw	F1	3.59		1				387694788608	16.23
		FALSE	Medium	Sequest HT (A3)	Selected	[K].DEANRPDTTEAGLAK.[L]		1	RecPY14His	RecPY14His	0	3	1	0	1	1	529.925	1587.76	1587.76	-0.2	-0.0001	HCD (High Energy Collision Dissociation)	MS2	62.0823	41.542	23.2797	6769	PY14_273_109186_PY14-20_A725-20200724_3.raw	F2	1.31		1
		FALSE	High	Sequest HT (A3)	Unambiguous	[K].DEANRPDTTEAGLAK.[L]		1	RecPY14His	RecPY14His	0	3	1	0	1	1	529.925	1587.76	1587.76	0.38	0.0002	HCD (High Energy Collision Dissociation)	MS2	3.08004	200	58.6359	17727	PY14_257_109481_P14_A725_20201216_1.raw	F1	2.39		1				443705	58.58
		FALSE	High	Mascot (A5)	Unambiguous	[K].DEANRPDTTEAGLAK.[L]		1	RecPY14His	RecPY14His	0	2	1	0	1	1	794.384	1587.76	1587.76	-0.69	-0.00055	HCD (High Energy Collision Dissociation)	MS2	24.6438	45.388	15.6044	3720	PY14_273_109186_PY14-20_A725-20200724_3.raw	F2		56	1	13	13	5.37032e-07	497934592	16.19
		FALSE	High	Mascot (A5)	Unambiguous	[K].DEANRPDTTEAGLAK.[L]		1	RecPY14His	RecPY14His	0	3	1	0	1	1	529.925	1587.76	1587.76	-0.2	-0.0001	HCD (High Energy Collision Dissociation)	MS2	43.8771	87.63	47.1788	15030	PY14_257_109481_P14_A725_20201216_1.raw	F1		36	1	13	13	4.98884e-05	35319080	47.23
		FALSE	High	Mascot (A5)	Unambiguous	[K].DEANRPDTTEAGLAK.[L]		1	RecPY14His	RecPY14His	0	3	1	0	1	1	529.925	1587.76	1587.76	0.27	0.00014	HCD (High Energy Collision Dissociation)	MS2	3.707	200	54.1071	16232	PY14_273_109186_PY14-20_A725-20200724_3.raw	F2		29	1	13	13	0.00025293	54197104	53.87
		FALSE	High	Mascot (A5)	Unambiguous	[K].DEANRPDTTEAGLAK.[L]		1	RecPY14His	RecPY14His	0	3	1	0	1	1	529.925	1587.76	1587.76	0.27	0.00014	HCD (High Energy Collision Dissociation)	MS2	13.3083	200	42.7062	13393	PY14_273_109186_PY14-20_A725-20200724_3.raw	F2		31	1	13	13	0.000161808	29279562	42.29
		FALSE	High	Mascot (A5)	Unambiguous	[K].DEANRPDTTEAGLAK.[L]		1	RecPY14His	RecPY14His	0	3	1	0	1	1	529.924	1587.76	1587.76	-2.16	-0.00114	HCD (High Energy Collision Dissociation)	MS2	17.515	173.794	26.8363	8291	PY14_273_109186_PY14-20_A725-20200724_3.raw	F2		29	1	13	13	0.000266686	196747840	27.29
		FALSE	High	Mascot (A5)	Unambiguous	[K].DEANRPDTTEAGLAK.[L]		1	RecPY14His	RecPY14His	0	3	1	0	1	1	529.925	1587.76	1587.76	0.03	2e-05	HCD (High Energy Collision Dissociation)	MS2	5.08479	200	38.9197	12382	PY14_273_109186_PY14-20_A725-20200724_3.raw	F2		19	1	13	13	0.00251189	40645516	38.46
		FALSE	High	Mascot (A5)	Unambiguous	[K].DEANRPDTTEAGLAK.[L]		1	RecPY14His	RecPY14His	0	2	1	0	1	1	794.382	1587.76	1587.76	-2.22	-0.00177	HCD (High Energy Collision Dissociation)	MS2	8.94745	26.291	18.9392	4120	PY14_257_109481_P14_A725_20201216_1.raw	F1		84	1	13	13	8.70964e-10	499735328	19.02
		FALSE	High	Mascot (A5)	Unambiguous	[K].DEANRPDTTEAGLAK.[L]		1	RecPY14His	RecPY14His	0	2	1	0	1	1	794.383	1587.76	1587.76	-1.99	-0.00158	HCD (High Energy Collision Dissociation)	MS2	0	94.4	16.4263	4025	PY14_273_109186_PY14-20_A725-20200724_3.raw	F2		79	1	13	13	2.38232e-09	497934592	16.19
		FALSE	Medium	Sequest HT (A3)	Unambiguous	[K].DEANRPDTTEAGLAK.[L]		1	RecPY14His	RecPY14His	0	3	1	0	1	1	529.925	1587.76	1587.76	0.5	0.00026	HCD (High Energy Collision Dissociation)	MS2	9.90587	200	41.8244	13163	PY14_273_109186_PY14-20_A725-20200724_3.raw	F2	2.18		1
		FALSE	High	Sequest HT (A3)	Unambiguous	[K].DEANRPDTTEAGLAK.[L]		1	RecPY14His	RecPY14His	0	3	1	0	1	1	529.925	1587.76	1587.76	-0.77	-0.00041	HCD (High Energy Collision Dissociation)	MS2	14.114	182.478	39.5787	12702	PY14_257_109481_P14_A725_20201216_1.raw	F1	2.72		1
		FALSE	High	Mascot (A5)	Unambiguous	[K].DEANRPDTTEAGLAK.[L]		1	RecPY14His	RecPY14His	0	3	1	0	1	1	529.924	1587.76	1587.76	-2.04	-0.00108	HCD (High Energy Collision Dissociation)	MS2	1.33514	5.089	19.1756	4198	PY14_257_109481_P14_A725_20201216_1.raw	F1		41	1	13	13	1.71791e-05	2022556416	19.16
		FALSE	High	Mascot (A5)	Unambiguous	[K].DEANRPDTTEAGLAK.[L]		1	RecPY14His	RecPY14His	0	2	1	0	1	1	794.384	1587.76	1587.76	0	0	HCD (High Energy Collision Dissociation)	MS2	10.1727	81.744	16.7063	4129	PY14_273_109186_PY14-20_A725-20200724_3.raw	F2		51	1	13	13	1.71396e-06	497934592	16.19
		FALSE	High	Mascot (A5)	Unambiguous	[K].DEANRPDTTEAGLAK.[L]		1	RecPY14His	RecPY14His	0	3	1	0	1	1	529.924	1587.76	1587.76	-2.04	-0.00108	HCD (High Energy Collision Dissociation)	MS2	30.8547	58.106	23.573	6890	PY14_273_109186_PY14-20_A725-20200724_3.raw	F2		33	1	13	13	9.09913e-05	165260176	23.3
		FALSE	High	Sequest HT (A3)	Unambiguous	[K].DEANRPDTTEAGLAK.[L]		1	RecPY14His	RecPY14His	0	3	1	0	1	1	529.925	1587.76	1587.76	-0.2	-0.0001	HCD (High Energy Collision Dissociation)	MS2	36.5283	57.084	24.0556	7086	PY14_273_109186_PY14-20_A725-20200724_3.raw	F2	2.44		1				164397536	23.97
		FALSE	High	Mascot (A5)	Unambiguous	[K].DEANRPDTTEAGLAK.[L]		1	RecPY14His	RecPY14His	0	3	1	0	1	1	529.924	1587.76	1587.76	-2.04	-0.00108	HCD (High Energy Collision Dissociation)	MS2	67.2683	46.585	24.3139	7192	PY14_273_109186_PY14-20_A725-20200724_3.raw	F2		39	1	13	13	2.44906e-05	164397536	23.97
		FALSE	High	Mascot (A5)	Unambiguous	[K].DEANRPDTTEAGLAK.[L]		1	RecPY14His	RecPY14His	0	3	1	0	1	1	529.925	1587.76	1587.76	0.03	2e-05	HCD (High Energy Collision Dissociation)	MS2	3.50213	200	65.3604	19134	PY14_257_109481_P14_A725_20201216_1.raw	F1		30	1	13	13	0.000202768	155198	65.71
		FALSE	Medium	Sequest HT (A3)	Unambiguous	[K].DEANRPDTTEAGLAK.[L]		1	RecPY14His	RecPY14His	0	3	1	0	1	1	529.925	1587.76	1587.76	0.27	0.00014	HCD (High Energy Collision Dissociation)	MS2	11.3984	200	42.1191	13240	PY14_273_109186_PY14-20_A725-20200724_3.raw	F2	1.41		1
		FALSE	High	Mascot (A5)	Unambiguous	[K].DEANRPDTTEAGLAK.[L]		1	RecPY14His	RecPY14His	0	3	1	0	1	1	529.925	1587.76	1587.76	0.15	8e-05	HCD (High Energy Collision Dissociation)	MS2	5.95276	200	68.7012	19815	PY14_257_109481_P14_A725_20201216_1.raw	F1		26	1	13	13	0.000465586	80266.1	68.41
		FALSE	High	Mascot (A5)	Unambiguous	[K].DEANRPDTTEAGLAK.[L]		1	RecPY14His	RecPY14His	0	2	1	0	1	1	794.382	1587.76	1587.76	-3.07	-0.00244	HCD (High Energy Collision Dissociation)	MS2	0.906054	6.345	16.9994	3482	PY14_257_109481_P14_A725_20201216_1.raw	F1		86	1	13	13	4.90908e-10	174257668096	16.23
		FALSE	High	Mascot (A5)	Unambiguous	[K].DEANRPDTTEAGLAK.[L]		1	RecPY14His	RecPY14His	0	3	1	0	1	1	529.927	1587.77	1587.76	2.8	0.00148	HCD (High Energy Collision Dissociation)	MS2	57.2426	84.962	21.821	6196	PY14_273_109186_PY14-20_A725-20200724_3.raw	F2		14	1	13	13	0.00824138	219520176	22.13
		FALSE	High	Mascot (A5)	Unambiguous	[K].DEANRPDTTEAGLAK.[L]		1	RecPY14His	RecPY14His	0	3	1	0	1	1	529.924	1587.76	1587.76	-2.39	-0.00126	HCD (High Energy Collision Dissociation)	MS2	24.7693	200	14.7819	2819	PY14_257_109481_P14_A725_20201216_1.raw	F1		34	1	13	13	8.8308e-05	40781688	14.93
		FALSE	High	Mascot (A5)	Unambiguous	[K].DEANRPDTTEAGLAK.[L]		1	RecPY14His	RecPY14His	0	3	1	0	1	1	529.925	1587.76	1587.76	0.15	8e-05	HCD (High Energy Collision Dissociation)	MS2	45.2711	73.362	45.7076	14611	PY14_257_109481_P14_A725_20201216_1.raw	F1		30	1	13	13	0.000209411	24303332	45.79
		FALSE	High	Sequest HT (A3)	Unambiguous	[K].DEANRPDTTEAGLAK.[L]		1	RecPY14His	RecPY14His	0	2	1	0	1	1	794.384	1587.76	1587.76	-0.38	-0.0003	HCD (High Energy Collision Dissociation)	MS2	5.77333	200	54.1319	16730	PY14_257_109481_P14_A725_20201216_1.raw	F1	2.73		1				22674696	53.58
		FALSE	High	Sequest HT (A3)	Unambiguous	[K].DEANRPDTTEAGLAK.[L]		1	RecPY14His	RecPY14His	0	3	1	0	1	1	529.925	1587.76	1587.76	0.5	0.00026	HCD (High Energy Collision Dissociation)	MS2	28.5549	200	33.2673	10590	PY14_273_109186_PY14-20_A725-20200724_3.raw	F2	2.94		1
		FALSE	High	Mascot (A5)	Unambiguous	[K].DEANRPDTTEAGLAK.[L]		1	RecPY14His	RecPY14His	0	3	1	0	1	1	529.924	1587.76	1587.76	-2.16	-0.00114	HCD (High Energy Collision Dissociation)	MS2	63.4062	200	34.9661	10903	PY14_257_109481_P14_A725_20201216_1.raw	F1		34	1	13	13	7.12853e-05	16730228	34.93
		FALSE	High	Sequest HT (A3)	Unambiguous	[K].DEANRPDTTEAGLAK.[L]		1	RecPY14His	RecPY14His	0	3	1	0	1	1	529.925	1587.76	1587.76	0.15	8e-05	HCD (High Energy Collision Dissociation)	MS2	45.2711	73.362	45.7076	14611	PY14_257_109481_P14_A725_20201216_1.raw	F1	2.36		1				24303332	45.79
		FALSE	High	Sequest HT (A3)	Unambiguous	[K].DEANRPDTTEAGLAK.[L]		1	RecPY14His	RecPY14His	0	3	1	0	1	1	529.925	1587.76	1587.76	-0.77	-0.00041	HCD (High Energy Collision Dissociation)	MS2	23.4902	200	39.2838	12602	PY14_257_109481_P14_A725_20201216_1.raw	F1	2.84		1				26571876	38.96
		FALSE	High	Sequest HT (A3)	Unambiguous	[K].DEANRPDTTEAGLAK.[L]		1	RecPY14His	RecPY14His	0	3	1	0	1	1	529.925	1587.76	1587.76	0.38	0.0002	HCD (High Energy Collision Dissociation)	MS2	4.02039	200	58.1171	17613	PY14_257_109481_P14_A725_20201216_1.raw	F1	2.6		1				776070	58.12
		FALSE	High	Mascot (A5)	Unambiguous	[K].DEANRPDTTEAGLAK.[L]		1	RecPY14His	RecPY14His	0	3	1	0	1	1	529.926	1587.76	1587.76	2.34	0.00124	HCD (High Energy Collision Dissociation)	MS2	68.7947	200	41.5113	13324	PY14_257_109481_P14_A725_20201216_1.raw	F1		41	1	13	13	1.64059e-05	76918104	41.07
		FALSE	High	Sequest HT (A3)	Unambiguous	[K].DEANRPDTTEAGLAK.[L]		1	RecPY14His	RecPY14His	0	3	1	0	1	1	529.925	1587.76	1587.76	-0.66	-0.00035	HCD (High Energy Collision Dissociation)	MS2	50.0212	90.492	29.242	8555	PY14_257_109481_P14_A725_20201216_1.raw	F1	3.6		1
		FALSE	Medium	Sequest HT (A3)	Unambiguous	[K].DEANRPDTTEAGLAK.[L]		1	RecPY14His	RecPY14His	0	3	1	0	1	1	529.925	1587.76	1587.76	0.38	0.0002	HCD (High Energy Collision Dissociation)	MS2	6.16036	200	56.6872	16828	PY14_273_109186_PY14-20_A725-20200724_3.raw	F2	1.14		1
		FALSE	Medium	Sequest HT (A3)	Selected	[K].DEANRPDTTEAGLAK.[L]		1	RecPY14His	RecPY14His	0	3	1	0	1	1	529.925	1587.76	1587.76	0.15	8e-05	HCD (High Energy Collision Dissociation)	MS2	4.03775	200	56.4332	16773	PY14_273_109186_PY14-20_A725-20200724_3.raw	F2	1.18		1
		FALSE	Medium	Sequest HT (A3)	Unambiguous	[K].DEANRPDTTEAGLAK.[L]		1	RecPY14His	RecPY14His	0	3	1	0	1	1	529.925	1587.76	1587.76	0.38	0.0002	HCD (High Energy Collision Dissociation)	MS2	5.65056	200	56.1742	16718	PY14_273_109186_PY14-20_A725-20200724_3.raw	F2	1		1
		FALSE	Medium	Sequest HT (A3)	Unambiguous	[K].DEANRPDTTEAGLAK.[L]		1	RecPY14His	RecPY14His	0	3	1	0	1	1	529.925	1587.76	1587.76	0.27	0.00014	HCD (High Energy Collision Dissociation)	MS2	3.04007	200	55.9226	16661	PY14_273_109186_PY14-20_A725-20200724_3.raw	F2	1.62		1
		FALSE	Medium	Sequest HT (A3)	Selected	[K].DEANRPDTTEAGLAK.[L]		1	RecPY14His	RecPY14His	0	3	1	0	1	1	529.925	1587.76	1587.76	0.15	8e-05	HCD (High Energy Collision Dissociation)	MS2	7.27279	200	57.4507	16986	PY14_273_109186_PY14-20_A725-20200724_3.raw	F2	1		1
		FALSE	Medium	Sequest HT (A3)	Unambiguous	[K].DEANRPDTTEAGLAK.[L]		1	RecPY14His	RecPY14His	0	3	1	0	1	1	529.925	1587.76	1587.76	0.27	0.00014	HCD (High Energy Collision Dissociation)	MS2	10.6289	200	42.4106	13316	PY14_273_109186_PY14-20_A725-20200724_3.raw	F2	1.45		1
		FALSE	High	Sequest HT (A3)	Unambiguous	[K].DEANRPDTTEAGLAK.[L]		1	RecPY14His	RecPY14His	0	3	1	0	1	1	529.925	1587.76	1587.76	-0.54	-0.00029	HCD (High Energy Collision Dissociation)	MS2	43.695	79.433	28.9486	8433	PY14_257_109481_P14_A725_20201216_1.raw	F1	2.86		1				148871136	28.68
		FALSE	High	Sequest HT (A3)	Unambiguous	[K].DEANRPDTTEAGLAK.[L]		1	RecPY14His	RecPY14His	0	3	1	0	1	1	529.925	1587.76	1587.76	0.27	0.00014	HCD (High Energy Collision Dissociation)	MS2	3.70616	196.795	53.1829	16477	PY14_257_109481_P14_A725_20201216_1.raw	F1	3.67		1				199217904	53.73
		FALSE	High	Mascot (A5)	Unambiguous	[K].DEANRPDTTEAGLAK.[L]		1	RecPY14His	RecPY14His	0	2	1	0	1	1	794.382	1587.76	1587.76	-2.22	-0.00177	HCD (High Energy Collision Dissociation)	MS2	0.316636	7.817	14.4812	3327	PY14_273_109186_PY14-20_A725-20200724_3.raw	F2		83	1	13	13	9.81748e-10	3062827776	14.74
		FALSE	Medium	Sequest HT (A3)	Selected	[K].DEANRPDTTEAGLAK.[L]		1	RecPY14His	RecPY14His	0	3	1	0	1	1	529.925	1587.76	1587.76	0.27	0.00014	HCD (High Energy Collision Dissociation)	MS2	6.04651	200	57.7079	17039	PY14_273_109186_PY14-20_A725-20200724_3.raw	F2	1.04		1
		FALSE	Medium	Sequest HT (A3)	Selected	[K].DEANRPDTTEAGLAK.[L]		1	RecPY14His	RecPY14His	0	3	1	0	1	1	529.925	1587.76	1587.76	0.15	8e-05	HCD (High Energy Collision Dissociation)	MS2	4.77511	200	58.7316	17248	PY14_273_109186_PY14-20_A725-20200724_3.raw	F2	1.16		1
		FALSE	Medium	Sequest HT (A3)	Unambiguous	[K].DEANRPDTTEAGLAK.[L]		1	RecPY14His	RecPY14His	0	3	1	0	1	1	529.925	1587.76	1587.76	0.27	0.00014	HCD (High Energy Collision Dissociation)	MS2	4.2953	200	57.9662	17091	PY14_273_109186_PY14-20_A725-20200724_3.raw	F2	1.2		1
		FALSE	Medium	Sequest HT (A3)	Unambiguous	[K].DEANRPDTTEAGLAK.[L]		1	RecPY14His	RecPY14His	0	3	1	0	1	1	529.926	1587.76	1587.76	1.76	0.00093	HCD (High Energy Collision Dissociation)	MS2	21.307	200	36.9123	11817	PY14_273_109186_PY14-20_A725-20200724_3.raw	F2	1.72		1
		FALSE	High	Mascot (A5)	Selected	[K].DEANRPDTTEAGLAK.[L]		1	RecPY14His	RecPY14His	0	3	1	0	1	1	529.925	1587.76	1587.76	0.03	2e-05	HCD (High Energy Collision Dissociation)	MS2	2.38911	200	60.0197	17509	PY14_273_109186_PY14-20_A725-20200724_3.raw	F2		17	1	13	13	0.0040738	875936	60.2
		FALSE	Medium	Sequest HT (A3)	Unambiguous	[K].DEANRPDTTEAGLAK.[L]		1	RecPY14His	RecPY14His	0	3	1	0	1	1	529.924	1587.76	1587.76	-2.04	-0.00108	HCD (High Energy Collision Dissociation)	MS2	67.2683	46.585	24.3139	7192	PY14_273_109186_PY14-20_A725-20200724_3.raw	F2	2.17		1
		FALSE	Medium	Sequest HT (A3)	Selected	[K].DEANRPDTTEAGLAK.[L]		1	RecPY14His	RecPY14His	0	3	1	0	1	1	529.925	1587.76	1587.76	0.5	0.00026	HCD (High Energy Collision Dissociation)	MS2	3.04505	200	68.2128	19142	PY14_273_109186_PY14-20_A725-20200724_3.raw	F2	1.01		1
		FALSE	High	Sequest HT (A3)	Unambiguous	[K].DEANRPDTTEAGLAK.[L]		1	RecPY14His	RecPY14His	0	3	1	0	1	1	529.926	1587.76	1587.76	0.96	0.00051	HCD (High Energy Collision Dissociation)	MS2	0	200	36.6247	11728	PY14_273_109186_PY14-20_A725-20200724_3.raw	F2	2.41		1				75642656	36.76
		FALSE	High	Sequest HT (A3)	Unambiguous	[K].DEANRPDTTEAGLAK.[L]		1	RecPY14His	RecPY14His	0	3	1	0	1	1	529.924	1587.76	1587.76	-1.23	-0.00065	HCD (High Energy Collision Dissociation)	MS2	31.378	124.411	25.8124	7864	PY14_273_109186_PY14-20_A725-20200724_3.raw	F2	2.43		1
		FALSE	High	Mascot (A5)	Unambiguous	[K].DEANRPDTTEAGLAK.[L]		1	RecPY14His	RecPY14His	0	2	1	0	1	1	794.384	1587.76	1587.76	0.08	6e-05	HCD (High Energy Collision Dissociation)	MS2	0	200	55.1629	16966	PY14_257_109481_P14_A725_20201216_1.raw	F1		22	1	13	13	0.0012331	831301	55.13
		FALSE	High	Sequest HT (A3)	Unambiguous	[K].DEANRPDTTEAGLAK.[L]		1	RecPY14His	RecPY14His	0	3	1	0	1	1	529.925	1587.76	1587.76	0.15	8e-05	HCD (High Energy Collision Dissociation)	MS2	41.5382	82.048	43.3429	13886	PY14_257_109481_P14_A725_20201216_1.raw	F1	2.56		1				30364786	43.59
		FALSE	High	Sequest HT (A3)	Unambiguous	[K].DEANRPDTTEAGLAK.[L]		1	RecPY14His	RecPY14His	0	3	1	0	1	1	529.925	1587.76	1587.76	-0.2	-0.0001	HCD (High Energy Collision Dissociation)	MS2	46.1372	84.334	45.3692	14510	PY14_257_109481_P14_A725_20201216_1.raw	F1	2.63		1				63863872	45.28
		FALSE	High	Sequest HT (A3)	Unambiguous	[K].DEANRPDTTEAGLAK.[L]		1	RecPY14His	RecPY14His	0	3	1	0	1	1	529.924	1587.76	1587.76	-1.46	-0.00077	HCD (High Energy Collision Dissociation)	MS2	12.4747	180.315	38.9433	12484	PY14_257_109481_P14_A725_20201216_1.raw	F1	2.41		1				26571876	38.96
		FALSE	Medium	Sequest HT (A3)	Selected	[K].DEANRPDTTEAGLAK.[L]		1	RecPY14His	RecPY14His	0	3	1	0	1	1	529.925	1587.76	1587.76	0.5	0.00026	HCD (High Energy Collision Dissociation)	MS2	8.99768	200	58.223	17144	PY14_273_109186_PY14-20_A725-20200724_3.raw	F2	1.27		1
		FALSE	High	Mascot (A5)	Unambiguous	[K].DEANRPDTTEAGLAK.[L]		1	RecPY14His	RecPY14His	0	2	1	0	1	1	794.382	1587.76	1587.76	-2.38	-0.00189	HCD (High Energy Collision Dissociation)	MS2	0	89.86	17.8983	4596	PY14_273_109186_PY14-20_A725-20200724_3.raw	F2		33	1	13	13	9.48418e-05	236274032	17.93
		FALSE	High	Mascot (A5)	Unambiguous	[K].DEANRPDTTEAGLAK.[L]		1	RecPY14His	RecPY14His	0	3	1	0	1	1	529.925	1587.76	1587.76	0.15	8e-05	HCD (High Energy Collision Dissociation)	MS2	10.1331	200	39.5006	12536	PY14_273_109186_PY14-20_A725-20200724_3.raw	F2		18	1	13	13	0.00292415	49712240	39.82
		FALSE	High	Sequest HT (A3)	Unambiguous	[K].DEANRPDTTEAGLAK.[L]		1	RecPY14His	RecPY14His	0	3	1	0	1	1	529.924	1587.76	1587.76	-1.58	-0.00084	HCD (High Energy Collision Dissociation)	MS2	12.3957	200	38.3806	12281	PY14_257_109481_P14_A725_20201216_1.raw	F1	2.71		1				25925786	38.33
		FALSE	High	Mascot (A5)	Unambiguous	[K].DEANRPDTTEAGLAK.[L]		1	RecPY14His	RecPY14His	0	2	1	0	1	1	794.382	1587.76	1587.76	-3.07	-0.00244	HCD (High Energy Collision Dissociation)	MS2	51.1349	105.202	23.097	5807	PY14_257_109481_P14_A725_20201216_1.raw	F1		40	1	13	13	2.17771e-05	111718984	22.99
		FALSE	Medium	Sequest HT (A3)	Unambiguous	[K].DEANRPDTTEAGLAK.[L]		1	RecPY14His	RecPY14His	0	3	1	0	1	1	529.925	1587.76	1587.76	0.38	0.0002	HCD (High Energy Collision Dissociation)	MS2	2.90419	200	55.3809	16535	PY14_273_109186_PY14-20_A725-20200724_3.raw	F2	1.17		1
		FALSE	Medium	Sequest HT (A3)	Unambiguous	[K].DEANRPDTTEAGLAK.[L]		1	RecPY14His	RecPY14His	0	3	1	0	1	1	529.925	1587.76	1587.76	0.38	0.0002	HCD (High Energy Collision Dissociation)	MS2	8.19596	200	55.1246	16476	PY14_273_109186_PY14-20_A725-20200724_3.raw	F2	1.47		1
		FALSE	Medium	Sequest HT (A3)	Unambiguous	[K].DEANRPDTTEAGLAK.[L]		1	RecPY14His	RecPY14His	0	2	1	0	1	1	794.384	1587.76	1587.76	0.08	6e-05	HCD (High Energy Collision Dissociation)	MS2	0	200	55.1629	16966	PY14_257_109481_P14_A725_20201216_1.raw	F1	1.38		1
		FALSE	High	Mascot (A5)	Unambiguous	[K].DEANRPDTTEAGLAK.[L]		1	RecPY14His	RecPY14His	0	3	1	0	1	1	529.924	1587.76	1587.76	-2.73	-0.00145	HCD (High Energy Collision Dissociation)	MS2	0.310678	0.39	14.7793	3430	PY14_273_109186_PY14-20_A725-20200724_3.raw	F2		40	1	13	13	1.83231e-05	361876586496	13.71
		FALSE	Medium	Sequest HT (A3)	Selected	[K].DEANRPDTTEAGLAK.[L]		1	RecPY14His	RecPY14His	0	3	1	0	1	1	529.925	1587.76	1587.76	0.15	8e-05	HCD (High Energy Collision Dissociation)	MS2	5.30434	200	54.867	16416	PY14_273_109186_PY14-20_A725-20200724_3.raw	F2	1.38		1
		FALSE	High	Sequest HT (A3)	Unambiguous	[K].DEANRPDTTEAGLAK.[L]		1	RecPY14His	RecPY14His	0	3	1	0	1	1	529.924	1587.76	1587.76	-1.58	-0.00084	HCD (High Energy Collision Dissociation)	MS2	42.6527	63.053	29.9955	8889	PY14_257_109481_P14_A725_20201216_1.raw	F1	2.5		1				89717416	30.02
		FALSE	Medium	Sequest HT (A3)	Unambiguous	[K].DEANRPDTTEAGLAK.[L]		1	RecPY14His	RecPY14His	0	3	1	0	1	1	529.925	1587.76	1587.76	0.38	0.0002	HCD (High Energy Collision Dissociation)	MS2	5.59975	200	54.6159	16355	PY14_273_109186_PY14-20_A725-20200724_3.raw	F2	1.47		1
		FALSE	High	Sequest HT (A3)	Unambiguous	[K].DEANRPDTTEAGLAK.[L]		1	RecPY14His	RecPY14His	0	3	1	0	1	1	529.925	1587.76	1587.76	0.27	0.00014	HCD (High Energy Collision Dissociation)	MS2	1.08848	125.716	53.9931	16694	PY14_257_109481_P14_A725_20201216_1.raw	F1	3.23		1				199217904	53.73
		FALSE	High	Sequest HT (A3)	Unambiguous	[K].DEANRPDTTEAGLAK.[L]		1	RecPY14His	RecPY14His	0	3	1	0	1	1	529.924	1587.76	1587.76	-2.16	-0.00114	HCD (High Energy Collision Dissociation)	MS2	17.515	173.794	26.8363	8291	PY14_273_109186_PY14-20_A725-20200724_3.raw	F2	2.73		1				196747840	27.29
		FALSE	High	Sequest HT (A3)	Unambiguous	[K].DEANRPDTTEAGLAK.[L]		1	RecPY14His	RecPY14His	0	3	1	0	1	1	529.925	1587.76	1587.76	-0.43	-0.00023	HCD (High Energy Collision Dissociation)	MS2	44.1624	177.339	30.8422	9253	PY14_257_109481_P14_A725_20201216_1.raw	F1	2.61		1				95931512	30.74
		FALSE	Medium	Sequest HT (A3)	Unambiguous	[K].DEANRPDTTEAGLAK.[L]		1	RecPY14His	RecPY14His	0	3	1	0	1	1	529.925	1587.76	1587.76	0.15	8e-05	HCD (High Energy Collision Dissociation)	MS2	4.46572	200	54.3608	16294	PY14_273_109186_PY14-20_A725-20200724_3.raw	F2	1.87		1
		FALSE	High	Sequest HT (A3)	Unambiguous	[K].DEANRPDTTEAGLAK.[L]		1	RecPY14His	RecPY14His	0	3	1	0	1	1	529.925	1587.76	1587.76	-0.54	-0.00029	HCD (High Energy Collision Dissociation)	MS2	36.3733	68.656	31.1208	9356	PY14_257_109481_P14_A725_20201216_1.raw	F1	2.93		1				138933872	31.15
		FALSE	Medium	Sequest HT (A3)	Unambiguous	[K].DEANRPDTTEAGLAK.[L]		1	RecPY14His	RecPY14His	0	3	1	0	1	1	529.925	1587.76	1587.76	0.27	0.00014	HCD (High Energy Collision Dissociation)	MS2	13.3083	200	42.7062	13393	PY14_273_109186_PY14-20_A725-20200724_3.raw	F2	1.47		1
		FALSE	Medium	Sequest HT (A3)	Unambiguous	[K].DEANRPDTTEAGLAK.[L]		1	RecPY14His	RecPY14His	0	3	1	0	1	1	529.925	1587.76	1587.76	0.27	0.00014	HCD (High Energy Collision Dissociation)	MS2	3.707	200	54.1071	16232	PY14_273_109186_PY14-20_A725-20200724_3.raw	F2	1.89		1
		FALSE	High	Sequest HT (A3)	Unambiguous	[K].DEANRPDTTEAGLAK.[L]		1	RecPY14His	RecPY14His	0	3	1	0	1	1	529.925	1587.76	1587.76	0.27	0.00014	HCD (High Energy Collision Dissociation)	MS2	3.44871	200	57.8594	17557	PY14_257_109481_P14_A725_20201216_1.raw	F1	2.63		1				776070	58.12
		FALSE	High	Sequest HT (A3)	Unambiguous	[K].DEANRPDTTEAGLAK.[L]		1	RecPY14His	RecPY14His	0	3	1	0	1	1	529.925	1587.76	1587.76	0.38	0.0002	HCD (High Energy Collision Dissociation)	MS2	5.84698	200	57.6011	17500	PY14_257_109481_P14_A725_20201216_1.raw	F1	2.52		1				1.33775e+06	57.29
		FALSE	High	Sequest HT (A3)	Unambiguous	[K].DEANRPDTTEAGLAK.[L]		1	RecPY14His	RecPY14His	0	3	1	0	1	1	529.925	1587.76	1587.76	-0.2	-0.0001	HCD (High Energy Collision Dissociation)	MS2	21.2904	131.528	27.098	8394	PY14_273_109186_PY14-20_A725-20200724_3.raw	F2	2.69		1				196747840	27.29
		FALSE	High	Sequest HT (A3)	Unambiguous	[K].DEANRPDTTEAGLAK.[L]		1	RecPY14His	RecPY14His	0	3	1	0	1	1	529.924	1587.76	1587.76	-1.81	-0.00096	HCD (High Energy Collision Dissociation)	MS2	67.1911	200	38.6536	12378	PY14_257_109481_P14_A725_20201216_1.raw	F1	2.86		1				26571876	38.96
		FALSE	High	Sequest HT (A3)	Unambiguous	[K].DEANRPDTTEAGLAK.[L]		1	RecPY14His	RecPY14His	0	3	1	0	1	1	529.925	1587.76	1587.76	0.5	0.00026	HCD (High Energy Collision Dissociation)	MS2	0.719217	200	57.3402	17443	PY14_257_109481_P14_A725_20201216_1.raw	F1	2.78		1				1.86378e+06	57.44
		FALSE	Medium	Sequest HT (A3)	Unambiguous	[K].DEANRPDTTEAGLAK.[L]		1	RecPY14His	RecPY14His	0	3	1	0	1	1	529.925	1587.76	1587.76	0.15	8e-05	HCD (High Energy Collision Dissociation)	MS2	6.05237	200	53.5959	16109	PY14_273_109186_PY14-20_A725-20200724_3.raw	F2	1.79		1
		FALSE	Medium	Sequest HT (A3)	Unambiguous	[K].DEANRPDTTEAGLAK.[L]		1	RecPY14His	RecPY14His	0	3	1	0	1	1	529.925	1587.76	1587.76	0.61	0.00032	HCD (High Energy Collision Dissociation)	MS2	12.5127	200	35.5563	11337	PY14_273_109186_PY14-20_A725-20200724_3.raw	F2	2.09		1
		FALSE	High	Mascot (A5)	Unambiguous	[K].DEANRPDTTEAGLAK.[L]		1	RecPY14His	RecPY14His	0	3	1	0	1	1	529.925	1587.76	1587.76	0.15	8e-05	HCD (High Energy Collision Dissociation)	MS2	9.60514	200	46.2893	14334	PY14_273_109186_PY14-20_A725-20200724_3.raw	F2		17	1	13	13	0.00357273	10105594	46.13
		FALSE	High	Sequest HT (A3)	Unambiguous	[K].DEANRPDTTEAGLAK.[L]		1	RecPY14His	RecPY14His	0	3	1	0	1	1	529.925	1587.76	1587.76	0.38	0.0002	HCD (High Energy Collision Dissociation)	MS2	1.86211	123.82	53.4605	16551	PY14_257_109481_P14_A725_20201216_1.raw	F1	3.53		1				199217904	53.73
		FALSE	High	Sequest HT (A3)	Unambiguous	[K].DEANRPDTTEAGLAK.[L]		1	RecPY14His	RecPY14His	0	3	1	0	1	1	529.925	1587.76	1587.76	0.15	8e-05	HCD (High Energy Collision Dissociation)	MS2	2.6873	200	53.8522	16171	PY14_273_109186_PY14-20_A725-20200724_3.raw	F2	2.42		1				54197104	53.87
		FALSE	Medium	Sequest HT (A3)	Unambiguous	[K].DEANRPDTTEAGLAK.[L]		1	RecPY14His	RecPY14His	0	3	1	0	1	1	529.925	1587.76	1587.76	-0.08	-4e-05	HCD (High Energy Collision Dissociation)	MS2	8.22226	200	53.3353	16045	PY14_273_109186_PY14-20_A725-20200724_3.raw	F2	1.1		1
		FALSE	High	Mascot (A5)	Unambiguous	[K].DEANRPDTTEAGLAK.[L]		1	RecPY14His	RecPY14His	0	3	1	0	1	1	529.928	1587.77	1587.76	5.46	0.00289	HCD (High Energy Collision Dissociation)	MS2	0.176799	0.039	13.9512	3141	PY14_273_109186_PY14-20_A725-20200724_3.raw	F2		37	1	13	13	3.74111e-05	361876586496	13.71
		FALSE	High	Mascot (A5)	Unambiguous	[K].DEANRPDTTEAGLAK.[L]		1	RecPY14His	RecPY14His	0	3	1	0	1	1	529.928	1587.77	1587.76	4.76	0.00252	HCD (High Energy Collision Dissociation)	MS2	0.208887	0.03	13.6923	3052	PY14_273_109186_PY14-20_A725-20200724_3.raw	F2		35	1	13	13	6.80769e-05	361876586496	13.71
		FALSE	High	Mascot (A5)	Unambiguous	[K].DEANRPDTTEAGLAK.[L]		1	RecPY14His	RecPY14His	0	3	1	0	1	1	529.925	1587.76	1587.76	0.15	8e-05	HCD (High Energy Collision Dissociation)	MS2	7.3558	200	43.2616	13545	PY14_273_109186_PY14-20_A725-20200724_3.raw	F2		24	1	13	13	0.000712853	34134672	43.21
		FALSE	High	Sequest HT (A3)	Unambiguous	[K].DEANRPDTTEAGLAK.[L]		1	RecPY14His	RecPY14His	0	3	1	0	1	1	529.925	1587.76	1587.76	0.15	8e-05	HCD (High Energy Collision Dissociation)	MS2	47.2114	73.035	43.6196	13972	PY14_257_109481_P14_A725_20201216_1.raw	F1	2.57		1				30364786	43.59
		FALSE	High	Mascot (A5)	Unambiguous	[K].DEANRPDTTEAGLAK.[L]		1	RecPY14His	RecPY14His	0	3	1	0	1	1	529.927	1587.77	1587.76	4.3	0.00228	HCD (High Energy Collision Dissociation)	MS2	0.510573	0.224	16.6891	3382	PY14_257_109481_P14_A725_20201216_1.raw	F1		47	1	13	13	4.03645e-06	387694788608	16.23
		FALSE	High	Sequest HT (A3)	Unambiguous	[K].DEANRPDTTEAGLAK.[L]		1	RecPY14His	RecPY14His	0	3	1	0	1	1	529.925	1587.76	1587.76	0.27	0.00014	HCD (High Energy Collision Dissociation)	MS2	29.875	65.813	45.0796	14424	PY14_257_109481_P14_A725_20201216_1.raw	F1	2.45		1				63863872	45.28
		FALSE	High	Mascot (A5)	Unambiguous	[K].DEANRPDTTEAGLAK.[L]		1	RecPY14His	RecPY14His	0	2	1	0	1	1	794.391	1587.77	1587.76	8.23	0.00653	HCD (High Energy Collision Dissociation)	MS2	31.4646	172.581	25.5101	6827	PY14_257_109481_P14_A725_20201216_1.raw	F1		50	1	13	13	1.86638e-06	68623536	25.44
		FALSE	High	Mascot (A5)	Unambiguous	[K].DEANRPDTTEAGLAK.[L]		1	RecPY14His	RecPY14His	0	2	1	0	1	1	794.382	1587.76	1587.76	-2.92	-0.00232	HCD (High Energy Collision Dissociation)	MS2	13.7296	200	18.4578	4809	PY14_273_109186_PY14-20_A725-20200724_3.raw	F2		53	1	13	13	1.05682e-06
		FALSE	High	Sequest HT (A3)	Unambiguous	[K].DEANRPDTTEAGLAK.[L]		1	RecPY14His	RecPY14His	0	3	1	0	1	1	529.927	1587.77	1587.76	2.92	0.00154	HCD (High Energy Collision Dissociation)	MS2	7.83817	93.543	32.2822	9844	PY14_257_109481_P14_A725_20201216_1.raw	F1	2.93		1				119074296	32.54
		FALSE	Medium	Sequest HT (A3)	Unambiguous	[K].DEANRPDTTEAGLAK.[L]		1	RecPY14His	RecPY14His	0	3	1	0	1	1	529.925	1587.76	1587.76	0.27	0.00014	HCD (High Energy Collision Dissociation)	MS2	47.9341	125.36	27.4336	8523	PY14_273_109186_PY14-20_A725-20200724_3.raw	F2	2.16		1
		FALSE	Medium	Sequest HT (A3)	Unambiguous	[K].DEANRPDTTEAGLAK.[L]		1	RecPY14His	RecPY14His	0	3	1	0	1	1	529.925	1587.76	1587.76	-0.08	-4e-05	HCD (High Energy Collision Dissociation)	MS2	4.81004	151.481	35.2548	11245	PY14_273_109186_PY14-20_A725-20200724_3.raw	F2	1.74		1
		FALSE	High	Mascot (A5)	Unambiguous	[K].DEANRPDTTEAGLAK.[L]		1	RecPY14His	RecPY14His	0	3	1	0	1	1	529.925	1587.76	1587.76	0.15	8e-05	HCD (High Energy Collision Dissociation)	MS2	2.6873	200	53.8522	16171	PY14_273_109186_PY14-20_A725-20200724_3.raw	F2		31	1	13	13	0.000145881	54197104	53.87
		FALSE	High	Mascot (A5)	Unambiguous	[K].DEANRPDTTEAGLAK.[L]		1	RecPY14His	RecPY14His	0	3	1	0	1	1	529.925	1587.76	1587.76	0.15	8e-05	HCD (High Energy Collision Dissociation)	MS2	30.2071	200	44.6045	13895	PY14_273_109186_PY14-20_A725-20200724_3.raw	F2		30	1	13	13	0.000201837	35915744	43.93
		FALSE	High	Mascot (A5)	Unambiguous	[K].DEANRPDTTEAGLAK.[L]		1	RecPY14His	RecPY14His	0	3	1	0	1	1	529.927	1587.77	1587.76	4.07	0.00215	HCD (High Energy Collision Dissociation)	MS2	0.243816	0.166	14.23	3240	PY14_273_109186_PY14-20_A725-20200724_3.raw	F2		25	1	13	13	0.000696627	361876586496	13.71
		FALSE	High	Mascot (A5)	Unambiguous	[K].DEANRPDTTEAGLAK.[L]		1	RecPY14His	RecPY14His	0	3	1	0	1	1	529.927	1587.77	1587.76	3.96	0.00209	HCD (High Energy Collision Dissociation)	MS2	0.0669418	2.341	13.7917	3080	PY14_273_109186_PY14-20_A725-20200724_3.raw	F2		14	1	13	13	0.00857038	361876586496	13.71
		FALSE	High	Mascot (A5)	Unambiguous	[K].DEANRPDTTEAGLAK.[L]		1	RecPY14His	RecPY14His	0	3	1	0	1	1	529.927	1587.77	1587.76	3.38	0.00179	HCD (High Energy Collision Dissociation)	MS2	0.260096	0.065	16.427	3298	PY14_257_109481_P14_A725_20201216_1.raw	F1		36	1	13	13	4.84172e-05	387694788608	16.23
		FALSE	High	Mascot (A5)	Unambiguous	[K].DEANRPDTTEAGLAK.[L]		1	RecPY14His	RecPY14His	0	3	1	0	1	1	529.927	1587.77	1587.76	3.15	0.00167	HCD (High Energy Collision Dissociation)	MS2	0.155854	0.437	15.916	3132	PY14_257_109481_P14_A725_20201216_1.raw	F1		49	1	13	13	2.36048e-06	387694788608	16.23
		FALSE	High	Mascot (A5)	Unambiguous	[K].DEANRPDTTEAGLAK.[L]		1	RecPY14His	RecPY14His	0	3	1	0	1	1	529.925	1587.76	1587.76	0.15	8e-05	HCD (High Energy Collision Dissociation)	MS2	6.05237	200	53.5959	16109	PY14_273_109186_PY14-20_A725-20200724_3.raw	F2		42	1	13	13	1.14025e-05	54197104	53.87
		FALSE	High	Mascot (A5)	Unambiguous	[K].DEANRPDTTEAGLAK.[L]		1	RecPY14His	RecPY14His	0	3	1	0	1	1	529.927	1587.77	1587.76	3.03	0.00161	HCD (High Energy Collision Dissociation)	MS2	4.59963	24.682	24.8887	6562	PY14_257_109481_P14_A725_20201216_1.raw	F1		41	1	13	13	1.57398e-05	556389760	24.62
		FALSE	High	Mascot (A5)	Unambiguous	[K].DEANRPDTTEAGLAK.[L]		1	RecPY14His	RecPY14His	0	3	1	0	1	1	529.925	1587.76	1587.76	0.15	8e-05	HCD (High Energy Collision Dissociation)	MS2	14.0095	200	46.8512	14479	PY14_273_109186_PY14-20_A725-20200724_3.raw	F2		17	1	13	13	0.00362243	9947921	46.91
		FALSE	High	Mascot (A5)	Unambiguous	[K].DEANRPDTTEAGLAK.[L]		1	RecPY14His	RecPY14His	0	3	1	0	1	1	529.927	1587.77	1587.76	2.92	0.00154	HCD (High Energy Collision Dissociation)	MS2	7.83817	93.543	32.2822	9844	PY14_257_109481_P14_A725_20201216_1.raw	F1		27	1	13	13	0.000369828	119074296	32.54
		FALSE	Medium	Sequest HT (A3)	Unambiguous	[K].DEANRPDTTEAGLAK.[L]		1	RecPY14His	RecPY14His	0	3	1	0	1	1	529.925	1587.76	1587.76	0.5	0.00026	HCD (High Energy Collision Dissociation)	MS2	13.0999	200	42.9784	13468	PY14_273_109186_PY14-20_A725-20200724_3.raw	F2	2.11		1
		FALSE	High	Sequest HT (A3)	Unambiguous	[K].DEANRPDTTEAGLAK.[L]		1	RecPY14His	RecPY14His	0	2	1	0	1	1	794.383	1587.76	1587.76	-1.07	-0.00085	HCD (High Energy Collision Dissociation)	MS2	12.7159	200	53.5904	16585	PY14_257_109481_P14_A725_20201216_1.raw	F1	2.54		1				22674696	53.58
		FALSE	High	Mascot (A5)	Unambiguous	[K].DEANRPDTTEAGLAK.[L]		1	RecPY14His	RecPY14His	0	3	1	0	1	1	529.924	1587.76	1587.76	-2.96	-0.00157	HCD (High Energy Collision Dissociation)	MS2	0	129.01	17.5103	4438	PY14_273_109186_PY14-20_A725-20200724_3.raw	F2		36	1	13	13	5.02343e-05	1479720064	17.95
		FALSE	High	Mascot (A5)	Unambiguous	[K].DEANRPDTTEAGLAK.[L]		1	RecPY14His	RecPY14His	0	3	1	0	1	1	529.925	1587.76	1587.76	0.15	8e-05	HCD (High Energy Collision Dissociation)	MS2	4.46572	200	54.3608	16294	PY14_273_109186_PY14-20_A725-20200724_3.raw	F2		34	1	13	13	7.17794e-05	54197104	53.87
		FALSE	Medium	Sequest HT (A3)	Unambiguous	[K].DEANRPDTTEAGLAK.[L]		1	RecPY14His	RecPY14His	0	3	1	0	1	1	529.926	1587.76	1587.76	1.65	0.00087	HCD (High Energy Collision Dissociation)	MS2	31.349	110.87	27.7751	8652	PY14_273_109186_PY14-20_A725-20200724_3.raw	F2	1.86		1
		FALSE	High	Mascot (A5)	Unambiguous	[K].DEANRPDTTEAGLAK.[L]		1	RecPY14His	RecPY14His	0	3	1	0	1	1	529.925	1587.76	1587.76	0.15	8e-05	HCD (High Energy Collision Dissociation)	MS2	8.62411	200	43.5543	13623	PY14_273_109186_PY14-20_A725-20200724_3.raw	F2		22	1	13	13	0.0012218	34134672	43.21
		FALSE	High	Sequest HT (A3)	Unambiguous	[K].DEANRPDTTEAGLAK.[L]		1	RecPY14His	RecPY14His	0	3	1	0	1	1	529.925	1587.76	1587.76	0.03	2e-05	HCD (High Energy Collision Dissociation)	MS2	0.810982	200	55.2854	16991	PY14_257_109481_P14_A725_20201216_1.raw	F1	2.96		1				4.77121e+06	55.18
		FALSE	Medium	Sequest HT (A3)	Selected	[K].DEANRPDTTEAGLAK.[L]		1	RecPY14His	RecPY14His	0	3	1	0	1	1	529.925	1587.76	1587.76	0.27	0.00014	HCD (High Energy Collision Dissociation)	MS2	2.95783	200	52.7725	15891	PY14_273_109186_PY14-20_A725-20200724_3.raw	F2	1.05		1
		FALSE	High	Sequest HT (A3)	Unambiguous	[K].DEANRPDTTEAGLAK.[L]		1	RecPY14His	RecPY14His	0	3	1	0	1	1	529.925	1587.76	1587.76	-0.31	-0.00016	HCD (High Energy Collision Dissociation)	MS2	4.22749	99.241	32.5665	9955	PY14_257_109481_P14_A725_20201216_1.raw	F1	3.02		1				119074296	32.54
		FALSE	High	Mascot (A5)	Unambiguous	[K].DEANRPDTTEAGLAK.[L]		1	RecPY14His	RecPY14His	0	2	1	0	1	1	794.386	1587.77	1587.76	2.62	0.00208	HCD (High Energy Collision Dissociation)	MS2	28.8211	56.153	20.8038	4808	PY14_257_109481_P14_A725_20201216_1.raw	F1		43	1	13	13	1.08143e-05
		FALSE	High	Mascot (A5)	Unambiguous	[K].DEANRPDTTEAGLAK.[L]		1	RecPY14His	RecPY14His	0	3	1	0	1	1	529.925	1587.76	1587.76	0.15	8e-05	HCD (High Energy Collision Dissociation)	MS2	3.34347	200	65.8743	19241	PY14_257_109481_P14_A725_20201216_1.raw	F1		46	1	13	13	5.62341e-06	155198	65.71
		FALSE	High	Mascot (A5)	Unambiguous	[K].DEANRPDTTEAGLAK.[L]		1	RecPY14His	RecPY14His	0	3	1	0	1	1	529.926	1587.76	1587.76	1.3	0.00069	HCD (High Energy Collision Dissociation)	MS2	20.978	113.349	23.0006	6661	PY14_273_109186_PY14-20_A725-20200724_3.raw	F2		26	1	13	13	0.000534564	164377104	22.64
		FALSE	High	Mascot (A5)	Unambiguous	[K].DEANRPDTTEAGLAK.[L]		1	RecPY14His	RecPY14His	0	2	1	0	1	1	794.385	1587.76	1587.76	1.31	0.00104	HCD (High Energy Collision Dissociation)	MS2	8.99278	142.094	21.1218	4937	PY14_257_109481_P14_A725_20201216_1.raw	F1		65	1	13	13	5.98412e-08
		FALSE	Medium	Sequest HT (A3)	Selected	[K].DEANRPDTTEAGLAK.[L]		1	RecPY14His	RecPY14His	0	2	1	0	1	1	794.382	1587.76	1587.76	-3.22	-0.00256	HCD (High Energy Collision Dissociation)	MS2	47.7118	200	45.2312	14471	PY14_257_109481_P14_A725_20201216_1.raw	F1	1.67		1
		FALSE	Medium	Sequest HT (A3)	Selected	[K].DEANRPDTTEAGLAK.[L]		1	RecPY14His	RecPY14His	0	2	1	0	1	1	794.383	1587.76	1587.76	-0.99	-0.00079	HCD (High Energy Collision Dissociation)	MS2	0	200	55.4149	17017	PY14_257_109481_P14_A725_20201216_1.raw	F1	1.33		1
		FALSE	High	Mascot (A5)	Unambiguous	[K].DEANRPDTTEAGLAK.[L]		1	RecPY14His	RecPY14His	0	3	1	0	1	1	529.926	1587.76	1587.76	2.23	0.00118	HCD (High Energy Collision Dissociation)	MS2	76.4752	200	39.9366	12823	PY14_257_109481_P14_A725_20201216_1.raw	F1		32	1	13	13	0.000115878
		FALSE	High	Mascot (A5)	Unambiguous	[K].DEANRPDTTEAGLAK.[L]		1	RecPY14His	RecPY14His	0	2	1	0	1	1	794.386	1587.76	1587.76	2	0.00159	HCD (High Energy Collision Dissociation)	MS2	37.3152	200	45.9521	14683	PY14_257_109481_P14_A725_20201216_1.raw	F1		17	1	13	13	0.00440555	9017439	45.99
		FALSE	High	Mascot (A5)	Unambiguous	[K].DEANRPDTTEAGLAK.[L]		1	RecPY14His	RecPY14His	0	3	1	0	1	1	529.925	1587.76	1587.76	0.15	8e-05	HCD (High Energy Collision Dissociation)	MS2	2.33258	8.037	16.6977	4123	PY14_273_109186_PY14-20_A725-20200724_3.raw	F2		42	1	13	13	1.26183e-05
		FALSE	High	Mascot (A5)	Unambiguous	[K].DEANRPDTTEAGLAK.[L]		1	RecPY14His	RecPY14His	0	3	1	0	1	1	529.925	1587.76	1587.76	0.15	8e-05	HCD (High Energy Collision Dissociation)	MS2	3.16198	200	60.9528	18224	PY14_257_109481_P14_A725_20201216_1.raw	F1		38	1	13	13	3.34195e-05	147864	60.93
		FALSE	Medium	Sequest HT (A3)	Unambiguous	[K].DEANRPDTTEAGLAK.[L]		1	RecPY14His	RecPY14His	0	3	1	0	1	1	529.925	1587.76	1587.76	0.15	8e-05	HCD (High Energy Collision Dissociation)	MS2	7.3558	200	43.2616	13545	PY14_273_109186_PY14-20_A725-20200724_3.raw	F2	1.46		1
		FALSE	High	Mascot (A5)	Unambiguous	[K].DEANRPDTTEAGLAK.[L]		1	RecPY14His	RecPY14His	0	3	1	0	1	1	529.925	1587.76	1587.76	0.15	8e-05	HCD (High Energy Collision Dissociation)	MS2	4.84742	32.927	25.4342	6792	PY14_257_109481_P14_A725_20201216_1.raw	F1		40	1	13	13	2.03236e-05	387418944	25.03
		FALSE	High	Mascot (A5)	Unambiguous	[K].DEANRPDTTEAGLAK.[L]		1	RecPY14His	RecPY14His	0	3	1	0	1	1	529.925	1587.76	1587.76	0.03	2e-05	HCD (High Energy Collision Dissociation)	MS2	0.957344	200	59.9184	18004	PY14_257_109481_P14_A725_20201216_1.raw	F1		41	1	13	13	1.52405e-05	297643	59.87
		FALSE	High	Mascot (A5)	Unambiguous	[K].DEANRPDTTEAGLAK.[L]		1	RecPY14His	RecPY14His	0	3	1	0	1	1	529.924	1587.76	1587.76	-3.08	-0.00163	HCD (High Energy Collision Dissociation)	MS2	26.1722	9.913	22.1705	5378	PY14_257_109481_P14_A725_20201216_1.raw	F1		26	1	13	13	0.000545758	859509504	21.99
		FALSE	High	Mascot (A5)	Unambiguous	[K].DEANRPDTTEAGLAK.[L]		1	RecPY14His	RecPY14His	0	3	1	0	1	1	529.926	1587.76	1587.76	2	0.00106	HCD (High Energy Collision Dissociation)	MS2	17.3119	99.672	23.3669	5918	PY14_257_109481_P14_A725_20201216_1.raw	F1		35	1	13	13	6.29506e-05	362481664	23.13
		FALSE	High	Mascot (A5)	Unambiguous	[K].DEANRPDTTEAGLAK.[L]		1	RecPY14His	RecPY14His	0	3	1	0	1	1	529.926	1587.76	1587.76	2	0.00106	HCD (High Energy Collision Dissociation)	MS2	27.6808	91.21	22.0956	6317	PY14_273_109186_PY14-20_A725-20200724_3.raw	F2		16	1	13	13	0.00522396	219520176	22.13
		FALSE	High	Mascot (A5)	Unambiguous	[K].DEANRPDTTEAGLAK.[L]		1	RecPY14His	RecPY14His	0	3	1	0	1	1	529.926	1587.76	1587.76	1.76	0.00093	HCD (High Energy Collision Dissociation)	MS2	0.115784	0.03	16.1703	3215	PY14_257_109481_P14_A725_20201216_1.raw	F1		43	1	13	13	1.10408e-05	387694788608	16.23
		FALSE	Medium	Sequest HT (A3)	Selected	[K].DEANRPDTTEAGLAK.[L]		1	RecPY14His	RecPY14His	0	3	1	0	1	1	529.925	1587.76	1587.76	0.27	0.00014	HCD (High Energy Collision Dissociation)	MS2	1.65475	200	52.5116	15830	PY14_273_109186_PY14-20_A725-20200724_3.raw	F2	1.36		1
		FALSE	High	Mascot (A5)	Unambiguous	[K].DEANRPDTTEAGLAK.[L]		1	RecPY14His	RecPY14His	0	3	1	0	1	1	529.926	1587.76	1587.76	1.76	0.00093	HCD (High Energy Collision Dissociation)	MS2	21.307	200	36.9123	11817	PY14_273_109186_PY14-20_A725-20200724_3.raw	F2		44	1	13	13	7.78037e-06	75642656	36.76
		FALSE	High	Mascot (A5)	Selected	[K].DEANRPDTTEAGLAK.[L]		1	RecPY14His	RecPY14His	0	3	1	0	1	1	529.926	1587.76	1587.76	1.76	0.00093	HCD (High Energy Collision Dissociation)	MS2	0	200	68.7206	19245	PY14_273_109186_PY14-20_A725-20200724_3.raw	F2		14	1	13	13	0.00797995	548153	69.21
		FALSE	High	Mascot (A5)	Unambiguous	[K].DEANRPDTTEAGLAK.[L]		1	RecPY14His	RecPY14His	0	3	1	0	1	1	529.926	1587.76	1587.76	1.65	0.00087	HCD (High Energy Collision Dissociation)	MS2	31.349	110.87	27.7751	8652	PY14_273_109186_PY14-20_A725-20200724_3.raw	F2		18	1	13	13	0.00304789	196747840	27.29
		FALSE	High	Mascot (A5)	Unambiguous	[K].DEANRPDTTEAGLAK.[L]		1	RecPY14His	RecPY14His	0	3	1	0	1	1	529.926	1587.76	1587.76	1.42	0.00075	HCD (High Energy Collision Dissociation)	MS2	26.1841	47.527	22.3765	6426	PY14_273_109186_PY14-20_A725-20200724_3.raw	F2		16	1	13	13	0.00516416	219520176	22.13
		FALSE	High	Sequest HT (A3)	Unambiguous	[K].DEANRPDTTEAGLAK.[L]		1	RecPY14His	RecPY14His	0	3	1	0	1	1	529.925	1587.76	1587.76	0.27	0.00014	HCD (High Energy Collision Dissociation)	MS2	3.11405	200	57.0842	17385	PY14_257_109481_P14_A725_20201216_1.raw	F1	2.8		1				1.7498e+06	57.01
		FALSE	High	Mascot (A5)	Unambiguous	[K].DEANRPDTTEAGLAK.[L]		1	RecPY14His	RecPY14His	0	3	1	0	1	1	529.924	1587.76	1587.76	-3.08	-0.00163	HCD (High Energy Collision Dissociation)	MS2	33.7842	13.292	18.6253	4868	PY14_273_109186_PY14-20_A725-20200724_3.raw	F2		28	1	13	13	0.000352371	1479720064	17.95
		FALSE	Medium	Sequest HT (A3)	Unambiguous	[K].DEANRPDTTEAGLAK.[L]		1	RecPY14His	RecPY14His	0	3	1	0	1	1	529.925	1587.76	1587.76	0.27	0.00014	HCD (High Energy Collision Dissociation)	MS2	54.5299	78.116	44.743	14325	PY14_257_109481_P14_A725_20201216_1.raw	F1	2.23		1
		FALSE	High	Mascot (A5)	Unambiguous	[K].DEANRPDTTEAGLAK.[L]		1	RecPY14His	RecPY14His	0	3	1	0	1	1	529.925	1587.76	1587.76	0.27	0.00014	HCD (High Energy Collision Dissociation)	MS2	3.2047	200	69.2171	19919	PY14_257_109481_P14_A725_20201216_1.raw	F1		43	1	13	13	1.09901e-05	411448	69.19
		FALSE	Medium	Sequest HT (A3)	Unambiguous	[K].DEANRPDTTEAGLAK.[L]		1	RecPY14His	RecPY14His	0	3	1	0	1	1	529.925	1587.76	1587.76	0.38	0.0002	HCD (High Energy Collision Dissociation)	MS2	7.41739	200	61.308	17769	PY14_273_109186_PY14-20_A725-20200724_3.raw	F2	1.02		1
		FALSE	High	Mascot (A5)	Unambiguous	[K].DEANRPDTTEAGLAK.[L]		1	RecPY14His	RecPY14His	0	3	1	0	1	1	529.925	1587.76	1587.76	0.27	0.00014	HCD (High Energy Collision Dissociation)	MS2	3.70616	196.795	53.1829	16477	PY14_257_109481_P14_A725_20201216_1.raw	F1		49	1	13	13	2.26986e-06	199217904	53.73
		FALSE	Medium	Sequest HT (A3)	Unambiguous	[K].DEANRPDTTEAGLAK.[L]		1	RecPY14His	RecPY14His	0	3	1	0	1	1	529.926	1587.76	1587.76	0.96	0.00051	HCD (High Energy Collision Dissociation)	MS2	0	190.613	32.5247	10333	PY14_273_109186_PY14-20_A725-20200724_3.raw	F2	2.23		1
		FALSE	High	Mascot (A5)	Unambiguous	[K].DEANRPDTTEAGLAK.[L]		1	RecPY14His	RecPY14His	0	2	1	0	1	1	794.38	1587.75	1587.76	-5.61	-0.00445	HCD (High Energy Collision Dissociation)	MS2	3.45052	141.677	18.1859	4708	PY14_273_109186_PY14-20_A725-20200724_3.raw	F2		31	1	13	13	0.000175792	236274032	17.93
		FALSE	Medium	Sequest HT (A3)	Unambiguous	[K].DEANRPDTTEAGLAK.[L]		1	RecPY14His	RecPY14His	0	2	1	0	1	1	794.384	1587.76	1587.76	0.31	0.00025	HCD (High Energy Collision Dissociation)	MS2	0	200	55.9302	17125	PY14_257_109481_P14_A725_20201216_1.raw	F1	0.92		1
		FALSE	High	Mascot (A5)	Unambiguous	[K].DEANRPDTTEAGLAK.[L]		1	RecPY14His	RecPY14His	0	3	1	0	1	1	529.925	1587.76	1587.76	0.5	0.00026	HCD (High Energy Collision Dissociation)	MS2	13.0999	200	42.9784	13468	PY14_273_109186_PY14-20_A725-20200724_3.raw	F2		48	1	13	13	2.91743e-06	12874993	42.88
		FALSE	High	Mascot (A5)	Unambiguous	[K].DEANRPDTTEAGLAK.[L]		1	RecPY14His	RecPY14His	0	3	1	0	1	1	529.926	1587.76	1587.76	0.73	0.00038	HCD (High Energy Collision Dissociation)	MS2	10.3061	200	34.6217	11048	PY14_273_109186_PY14-20_A725-20200724_3.raw	F2		35	1	13	13	5.79429e-05	65576612	35.22
		FALSE	High	Mascot (A5)	Unambiguous	[K].DEANRPDTTEAGLAK.[L]		1	RecPY14His	RecPY14His	0	3	1	0	1	1	529.926	1587.76	1587.76	0.73	0.00038	HCD (High Energy Collision Dissociation)	MS2	3.26641	200	63.8153	18819	PY14_257_109481_P14_A725_20201216_1.raw	F1		46	1	13	13	4.73151e-06	218990	63.83
		FALSE	High	Sequest HT (A3)	Unambiguous	[K].DEANRPDTTEAGLAK.[L]		1	RecPY14His	RecPY14His	0	3	1	0	1	1	529.925	1587.76	1587.76	0.38	0.0002	HCD (High Energy Collision Dissociation)	MS2	1.44898	112.655	53.7347	16625	PY14_257_109481_P14_A725_20201216_1.raw	F1	3.61		1				199217904	53.73
		FALSE	High	Mascot (A5)	Unambiguous	[K].DEANRPDTTEAGLAK.[L]		1	RecPY14His	RecPY14His	0	3	1	0	1	1	529.926	1587.76	1587.76	0.73	0.00038	HCD (High Energy Collision Dissociation)	MS2	0	200	69.4756	19973	PY14_257_109481_P14_A725_20201216_1.raw	F1		30	1	13	13	0.000215278	275800	69.51
		FALSE	High	Mascot (A5)	Unambiguous	[K].DEANRPDTTEAGLAK.[L]		1	RecPY14His	RecPY14His	0	3	1	0	1	1	529.926	1587.76	1587.76	0.73	0.00038	HCD (High Energy Collision Dissociation)	MS2	3.84405	200	66.9057	19452	PY14_257_109481_P14_A725_20201216_1.raw	F1		49	1	13	13	2.38232e-06	164325	67.24
		FALSE	High	Mascot (A5)	Unambiguous	[K].DEANRPDTTEAGLAK.[L]		1	RecPY14His	RecPY14His	0	3	1	0	1	1	529.926	1587.76	1587.76	0.73	0.00038	HCD (High Energy Collision Dissociation)	MS2	0	200	43.843	13698	PY14_273_109186_PY14-20_A725-20200724_3.raw	F2		47	1	13	13	3.68129e-06	35915744	43.93
		FALSE	High	Mascot (A5)	Unambiguous	[K].DEANRPDTTEAGLAK.[L]		1	RecPY14His	RecPY14His	0	3	1	0	1	1	529.923	1587.76	1587.76	-3.19	-0.00169	HCD (High Energy Collision Dissociation)	MS2	42.1139	20.267	20.0915	4557	PY14_257_109481_P14_A725_20201216_1.raw	F1		38	1	13	13	3.45939e-05	1012245376	20.37
		FALSE	Medium	Sequest HT (A3)	Unambiguous	[K].DEANRPDTTEAGLAK.[L]		1	RecPY14His	RecPY14His	0	3	1	0	1	1	529.925	1587.76	1587.76	0.15	8e-05	HCD (High Energy Collision Dissociation)	MS2	8.62411	200	43.5543	13623	PY14_273_109186_PY14-20_A725-20200724_3.raw	F2	1.55		1
		FALSE	High	Sequest HT (A3)	Unambiguous	[K].DEANRPDTTEAGLAK.[L]		1	RecPY14His	RecPY14His	0	3	1	0	1	1	529.925	1587.76	1587.76	-1	-0.00053	HCD (High Energy Collision Dissociation)	MS2	21.5868	200	33.7671	10430	PY14_257_109481_P14_A725_20201216_1.raw	F1	3.27		1				77821984	33.45
		FALSE	High	Mascot (A5)	Unambiguous	[K].DEANRPDTTEAGLAK.[L]		1	RecPY14His	RecPY14His	0	3	1	0	1	1	529.926	1587.76	1587.76	0.73	0.00038	HCD (High Energy Collision Dissociation)	MS2	11.313	143.318	30.0336	9480	PY14_273_109186_PY14-20_A725-20200724_3.raw	F2		38	1	13	13	3.50752e-05	39260428	29.66
		FALSE	Medium	Sequest HT (A3)	Selected	[K].DEANRPDTTEAGLAK.[L]		1	RecPY14His	RecPY14His	0	3	1	0	1	1	529.925	1587.76	1587.76	0.38	0.0002	HCD (High Energy Collision Dissociation)	MS2	34.0145	200	44.8697	13964	PY14_273_109186_PY14-20_A725-20200724_3.raw	F2	1.2		1
		FALSE	High	Mascot (A5)	Unambiguous	[K].DEANRPDTTEAGLAK.[L]		1	RecPY14His	RecPY14His	0	3	1	0	1	1	529.925	1587.76	1587.76	0.27	0.00014	HCD (High Energy Collision Dissociation)	MS2	1.08848	125.716	53.9931	16694	PY14_257_109481_P14_A725_20201216_1.raw	F1		45	1	13	13	5.91562e-06	199217904	53.73
		FALSE	High	Mascot (A5)	Unambiguous	[K].DEANRPDTTEAGLAK.[L]		1	RecPY14His	RecPY14His	0	3	1	0	1	1	529.925	1587.76	1587.76	0.38	0.0002	HCD (High Energy Collision Dissociation)	MS2	1.92914	200	69.9832	20074	PY14_257_109481_P14_A725_20201216_1.raw	F1		45	1	13	13	6.63743e-06	97335.2	69.95
		FALSE	High	Sequest HT (A3)	Unambiguous	[K].DEANRPDTTEAGLAK.[L]		1	RecPY14His	RecPY14His	0	3	1	0	1	1	529.925	1587.76	1587.76	-0.08	-4e-05	HCD (High Energy Collision Dissociation)	MS2	14.2639	135.784	35.614	11143	PY14_257_109481_P14_A725_20201216_1.raw	F1	2.7		1				70653816	35.47
		FALSE	High	Mascot (A5)	Unambiguous	[K].DEANRPDTTEAGLAK.[L]		1	RecPY14His	RecPY14His	0	3	1	0	1	1	529.925	1587.76	1587.76	0.27	0.00014	HCD (High Energy Collision Dissociation)	MS2	32.5552	109.341	40.9338	13139	PY14_257_109481_P14_A725_20201216_1.raw	F1		25	1	13	13	0.000583445	76918104	41.07
		FALSE	High	Mascot (A5)	Unambiguous	[K].DEANRPDTTEAGLAK.[L]		1	RecPY14His	RecPY14His	0	3	1	0	1	1	529.925	1587.76	1587.76	0.38	0.0002	HCD (High Energy Collision Dissociation)	MS2	4.57122	200	63.2907	18711	PY14_257_109481_P14_A725_20201216_1.raw	F1		43	1	13	13	9.52796e-06	230616	63.25
		FALSE	High	Mascot (A5)	Unambiguous	[K].DEANRPDTTEAGLAK.[L]		1	RecPY14His	RecPY14His	0	3	1	0	1	1	529.925	1587.76	1587.76	0.38	0.0002	HCD (High Energy Collision Dissociation)	MS2	9.87302	170.322	34.3515	10963	PY14_273_109186_PY14-20_A725-20200724_3.raw	F2		33	1	13	13	0.000109901
		FALSE	High	Mascot (A5)	Unambiguous	[K].DEANRPDTTEAGLAK.[L]		1	RecPY14His	RecPY14His	0	3	1	0	1	1	529.925	1587.76	1587.76	0.38	0.0002	HCD (High Energy Collision Dissociation)	MS2	2.66227	200	63.0351	18657	PY14_257_109481_P14_A725_20201216_1.raw	F1		36	1	13	13	4.51856e-05	372810	62.9
		FALSE	High	Mascot (A5)	Unambiguous	[K].DEANRPDTTEAGLAK.[L]		1	RecPY14His	RecPY14His	0	3	1	0	1	1	529.925	1587.76	1587.76	0.38	0.0002	HCD (High Energy Collision Dissociation)	MS2	3.9788	200	66.3864	19346	PY14_257_109481_P14_A725_20201216_1.raw	F1		34	1	13	13	8.8308e-05	395281	66.66
		FALSE	High	Mascot (A5)	Unambiguous	[K].DEANRPDTTEAGLAK.[L]		1	RecPY14His	RecPY14His	0	3	1	0	1	1	529.923	1587.75	1587.76	-4.12	-0.00218	HCD (High Energy Collision Dissociation)	MS2	24.9009	68.582	20.7367	5737	PY14_273_109186_PY14-20_A725-20200724_3.raw	F2		22	1	13	13	0.0011324	137061600	21.13
		FALSE	Medium	Sequest HT (A3)	Unambiguous	[K].DEANRPDTTEAGLAK.[L]		1	RecPY14His	RecPY14His	0	3	1	0	1	1	529.925	1587.76	1587.76	0.27	0.00014	HCD (High Energy Collision Dissociation)	MS2	11.4464	200	45.7616	14197	PY14_273_109186_PY14-20_A725-20200724_3.raw	F2	1.45		1
		FALSE	Medium	Sequest HT (A3)	Unambiguous	[K].DEANRPDTTEAGLAK.[L]		1	RecPY14His	RecPY14His	0	3	1	0	1	1	529.925	1587.76	1587.76	-0.2	-0.0001	HCD (High Energy Collision Dissociation)	MS2	30.9469	112.986	32.2242	10226	PY14_273_109186_PY14-20_A725-20200724_3.raw	F2	2.06		1
		FALSE	High	Mascot (A5)	Unambiguous	[K].DEANRPDTTEAGLAK.[L]		1	RecPY14His	RecPY14His	0	3	1	0	1	1	529.925	1587.76	1587.76	0.38	0.0002	HCD (High Energy Collision Dissociation)	MS2	4.0011	200	66.1306	19294	PY14_257_109481_P14_A725_20201216_1.raw	F1		40	1	13	13	2.04644e-05	155198	65.71
		FALSE	High	Mascot (A5)	Unambiguous	[K].DEANRPDTTEAGLAK.[L]		1	RecPY14His	RecPY14His	0	3	1	0	1	1	529.925	1587.76	1587.76	0.38	0.0002	HCD (High Energy Collision Dissociation)	MS2	2.81991	200	64.0709	18871	PY14_257_109481_P14_A725_20201216_1.raw	F1		36	1	13	13	5.11682e-05	194058	63.94
		FALSE	High	Mascot (A5)	Unambiguous	[K].DEANRPDTTEAGLAK.[L]		1	RecPY14His	RecPY14His	0	3	1	0	1	1	529.923	1587.76	1587.76	-3.31	-0.00175	HCD (High Energy Collision Dissociation)	MS2	0	25.573	17.5168	4440	PY14_273_109186_PY14-20_A725-20200724_3.raw	F2		43	1	13	13	9.12011e-06	1479720064	17.95
		FALSE	Medium	Sequest HT (A3)	Unambiguous	[K].DEANRPDTTEAGLAK.[L]		1	RecPY14His	RecPY14His	0	3	1	0	1	1	529.925	1587.76	1587.76	0.5	0.00026	HCD (High Energy Collision Dissociation)	MS2	6.27683	200	33.5553	10688	PY14_273_109186_PY14-20_A725-20200724_3.raw	F2	2.18		1
		FALSE	High	Mascot (A5)	Unambiguous	[K].DEANRPDTTEAGLAK.[L]		1	RecPY14His	RecPY14His	0	3	1	0	1	1	529.925	1587.76	1587.76	0.38	0.0002	HCD (High Energy Collision Dissociation)	MS2	7.54624	200	67.1585	19503	PY14_257_109481_P14_A725_20201216_1.raw	F1		19	1	13	13	0.00260615	71292.1	67.13
		FALSE	High	Mascot (A5)	Unambiguous	[K].DEANRPDTTEAGLAK.[L]		1	RecPY14His	RecPY14His	0	3	1	0	1	1	529.925	1587.76	1587.76	0.27	0.00014	HCD (High Energy Collision Dissociation)	MS2	0.669415	200	54.2614	16763	PY14_257_109481_P14_A725_20201216_1.raw	F1		40	1	13	13	2.23872e-05	199217904	53.73
		FALSE	High	Mascot (A5)	Unambiguous	[K].DEANRPDTTEAGLAK.[L]		1	RecPY14His	RecPY14His	0	3	1	0	1	1	529.923	1587.76	1587.76	-3.31	-0.00175	HCD (High Energy Collision Dissociation)	MS2	1.6302	6.315	16.152	3921	PY14_273_109186_PY14-20_A725-20200724_3.raw	F2		28	1	13	13	0.000331131
		FALSE	High	Mascot (A5)	Unambiguous	[K].DEANRPDTTEAGLAK.[L]		1	RecPY14His	RecPY14His	0	3	1	0	1	1	529.925	1587.76	1587.76	0.27	0.00014	HCD (High Energy Collision Dissociation)	MS2	4.75817	200	52.3491	16260	PY14_257_109481_P14_A725_20201216_1.raw	F1		37	1	13	13	3.98107e-05	106340992	51.82
		FALSE	High	Mascot (A5)	Unambiguous	[K].DEANRPDTTEAGLAK.[L]		1	RecPY14His	RecPY14His	0	3	1	0	1	1	529.925	1587.76	1587.76	0.38	0.0002	HCD (High Energy Collision Dissociation)	MS2	19.6338	200	45.1721	14042	PY14_273_109186_PY14-20_A725-20200724_3.raw	F2		13	1	13	13	0.0097051	12029082	44.86
		FALSE	High	Mascot (A5)	Unambiguous	[K].DEANRPDTTEAGLAK.[L]		1	RecPY14His	RecPY14His	0	3	1	0	1	1	529.925	1587.76	1587.76	0.38	0.0002	HCD (High Energy Collision Dissociation)	MS2	4.96907	200	38.6324	12304	PY14_273_109186_PY14-20_A725-20200724_3.raw	F2		31	1	13	13	0.000148936	40645516	38.46
		FALSE	High	Mascot (A5)	Unambiguous	[K].DEANRPDTTEAGLAK.[L]		1	RecPY14His	RecPY14His	0	3	1	0	1	1	529.925	1587.76	1587.76	0.38	0.0002	HCD (High Energy Collision Dissociation)	MS2	2.62184	200	37.5044	11988	PY14_273_109186_PY14-20_A725-20200724_3.raw	F2		28	1	13	13	0.000286418	28984758	37.91
		FALSE	High	Mascot (A5)	Unambiguous	[K].DEANRPDTTEAGLAK.[L]		1	RecPY14His	RecPY14His	0	3	1	0	1	1	529.925	1587.76	1587.76	0.27	0.00014	HCD (High Energy Collision Dissociation)	MS2	6.48621	186.41	52.0641	16186	PY14_257_109481_P14_A725_20201216_1.raw	F1		43	1	13	13	9.39723e-06	106340992	51.82
		FALSE	Medium	Sequest HT (A3)	Unambiguous	[K].DEANRPDTTEAGLAK.[L]		1	RecPY14His	RecPY14His	0	3	1	0	1	1	529.925	1587.76	1587.76	0.38	0.0002	HCD (High Energy Collision Dissociation)	MS2	16.5995	200	45.4772	14124	PY14_273_109186_PY14-20_A725-20200724_3.raw	F2	1.79		1
		FALSE	High	Mascot (A5)	Selected	[K].DEANRPDTTEAGLAK.[L]		1	RecPY14His	RecPY14His	0	3	1	0	1	1	529.926	1587.76	1587.76	0.73	0.00038	HCD (High Energy Collision Dissociation)	MS2	0	200	66.9328	18894	PY14_273_109186_PY14-20_A725-20200724_3.raw	F2		13	1	13	13	0.00948418
		FALSE	High	Sequest HT (A3)	Unambiguous	[K].DEANRPDTTEAGLAK.[L]		1	RecPY14His	RecPY14His	0	3	1	0	1	1	529.925	1587.76	1587.76	0.38	0.0002	HCD (High Energy Collision Dissociation)	MS2	3.59055	200	56.5673	17268	PY14_257_109481_P14_A725_20201216_1.raw	F1	3.17		1				2.74448e+06	56.47
		FALSE	High	Mascot (A5)	Selected	[K].DEANRPDTTEAGLAK.[L]		1	RecPY14His	RecPY14His	0	2	1	0	1	1	794.385	1587.76	1587.76	0.93	0.00074	HCD (High Energy Collision Dissociation)	MS2	11.4048	200	56.6945	17299	PY14_257_109481_P14_A725_20201216_1.raw	F1		16	1	13	13	0.00484172
		FALSE	High	Mascot (A5)	Unambiguous	[K].DEANRPDTTEAGLAK.[L]		1	RecPY14His	RecPY14His	0	2	1	0	1	1	794.384	1587.76	1587.76	0.24	0.00019	HCD (High Energy Collision Dissociation)	MS2	24.1991	79.036	19.7908	4445	PY14_257_109481_P14_A725_20201216_1.raw	F1		80	1	13	13	2.0797e-09	499735328	19.02
		FALSE	High	Mascot (A5)	Unambiguous	[K].DEANRPDTTEAGLAK.[L]		1	RecPY14His	RecPY14His	0	3	1	0	1	1	529.926	1587.76	1587.76	0.84	0.00045	HCD (High Energy Collision Dissociation)	MS2	31.2105	28.012	25.1489	6672	PY14_257_109481_P14_A725_20201216_1.raw	F1		17	1	13	13	0.0042658	387418944	25.03
		FALSE	High	Sequest HT (A3)	Unambiguous	[K].DEANRPDTTEAGLAK.[L]		1	RecPY14His	RecPY14His	0	3	1	0	1	1	529.924	1587.76	1587.76	-1.58	-0.00084	HCD (High Energy Collision Dissociation)	MS2	27.0186	200	33.3354	10260	PY14_257_109481_P14_A725_20201216_1.raw	F1	2.49		1				77821984	33.45
		FALSE	High	Mascot (A5)	Unambiguous	[K].DEANRPDTTEAGLAK.[L]		1	RecPY14His	RecPY14His	0	3	1	0	1	1	529.926	1587.76	1587.76	0.84	0.00045	HCD (High Energy Collision Dissociation)	MS2	10.731	182.981	30.9025	9785	PY14_273_109186_PY14-20_A725-20200724_3.raw	F2		31	1	13	13	0.000155955	114802552	30.91
		FALSE	High	Mascot (A5)	Unambiguous	[K].DEANRPDTTEAGLAK.[L]		1	RecPY14His	RecPY14His	0	2	1	0	1	1	794.385	1587.76	1587.76	0.77	0.00061	HCD (High Energy Collision Dissociation)	MS2	11.9829	200	53.8751	16661	PY14_257_109481_P14_A725_20201216_1.raw	F1		54	1	13	13	8.18465e-07	22674696	53.58
		FALSE	High	Mascot (A5)	Unambiguous	[K].DEANRPDTTEAGLAK.[L]		1	RecPY14His	RecPY14His	0	2	1	0	1	1	794.385	1587.76	1587.76	0.77	0.00061	HCD (High Energy Collision Dissociation)	MS2	19.4222	200	54.3903	16791	PY14_257_109481_P14_A725_20201216_1.raw	F1		19	1	13	13	0.00255859	1.82841e+06	54.67
		FALSE	High	Sequest HT (A3)	Unambiguous	[K].DEANRPDTTEAGLAK.[L]		1	RecPY14His	RecPY14His	0	3	1	0	1	1	529.926	1587.76	1587.76	0.73	0.00038	HCD (High Energy Collision Dissociation)	MS2	24.0508	192.186	29.7167	9366	PY14_273_109186_PY14-20_A725-20200724_3.raw	F2	2.42		1				39260428	29.66
		FALSE	High	Sequest HT (A3)	Unambiguous	[K].DEANRPDTTEAGLAK.[L]		1	RecPY14His	RecPY14His	0	2	1	0	1	1	794.385	1587.76	1587.76	0.77	0.00061	HCD (High Energy Collision Dissociation)	MS2	11.9829	200	53.8751	16661	PY14_257_109481_P14_A725_20201216_1.raw	F1	2.27		1				22674696	53.58
		FALSE	Medium	Sequest HT (A3)	Unambiguous	[K].DEANRPDTTEAGLAK.[L]		1	RecPY14His	RecPY14His	0	3	1	0	1	1	529.925	1587.76	1587.76	-0.2	-0.0001	HCD (High Energy Collision Dissociation)	MS2	38.0452	74.856	44.4509	14238	PY14_257_109481_P14_A725_20201216_1.raw	F1	2.21		1
		FALSE	High	Sequest HT (A3)	Unambiguous	[K].DEANRPDTTEAGLAK.[L]		1	RecPY14His	RecPY14His	0	3	1	0	1	1	529.925	1587.76	1587.76	0.03	2e-05	HCD (High Energy Collision Dissociation)	MS2	13.3575	200	55.8018	17095	PY14_257_109481_P14_A725_20201216_1.raw	F1	2.9		1				4476378	55.72
		FALSE	High	Mascot (A5)	Unambiguous	[K].DEANRPDTTEAGLAK.[L]		1	RecPY14His	RecPY14His	0	3	1	0	1	1	529.925	1587.76	1587.76	0.27	0.00014	HCD (High Energy Collision Dissociation)	MS2	8.50497	200	41.5293	13085	PY14_273_109186_PY14-20_A725-20200724_3.raw	F2		33	1	13	13	9.86279e-05	28510050	41.93
		FALSE	High	Mascot (A5)	Unambiguous	[K].DEANRPDTTEAGLAK.[L]		1	RecPY14His	RecPY14His	0	3	1	0	1	1	529.925	1587.76	1587.76	0.27	0.00014	HCD (High Energy Collision Dissociation)	MS2	11.3984	200	42.1191	13240	PY14_273_109186_PY14-20_A725-20200724_3.raw	F2		20	1	13	13	0.0018197	29279562	42.29
		FALSE	High	Sequest HT (A3)	Unambiguous	[K].DEANRPDTTEAGLAK.[L]		1	RecPY14His	RecPY14His	0	3	1	0	1	1	529.924	1587.76	1587.76	-1.23	-0.00065	HCD (High Energy Collision Dissociation)	MS2	12.1914	139.472	34.3931	10679	PY14_257_109481_P14_A725_20201216_1.raw	F1	2.45		1				76851272	34.34
		FALSE	High	Mascot (A5)	Unambiguous	[K].DEANRPDTTEAGLAK.[L]		1	RecPY14His	RecPY14His	0	3	1	0	1	1	529.925	1587.76	1587.76	0.5	0.00026	HCD (High Energy Collision Dissociation)	MS2	7.62373	184.419	51.9756	15695	PY14_273_109186_PY14-20_A725-20200724_3.raw	F2		35	1	13	13	7.06318e-05	11407291	52
		FALSE	High	Mascot (A5)	Unambiguous	[K].DEANRPDTTEAGLAK.[L]		1	RecPY14His	RecPY14His	0	3	1	0	1	1	529.925	1587.76	1587.76	0.27	0.00014	HCD (High Energy Collision Dissociation)	MS2	10.6289	200	42.4106	13316	PY14_273_109186_PY14-20_A725-20200724_3.raw	F2		13	1	13	13	0.01	29279562	42.29
		FALSE	High	Mascot (A5)	Unambiguous	[K].DEANRPDTTEAGLAK.[L]		1	RecPY14His	RecPY14His	0	2	1	0	1	1	794.385	1587.76	1587.76	0.93	0.00074	HCD (High Energy Collision Dissociation)	MS2	21.056	44.203	18.6564	4021	PY14_257_109481_P14_A725_20201216_1.raw	F1		84	1	13	13	8.55067e-10	499735328	19.02
		FALSE	High	Mascot (A5)	Unambiguous	[K].DEANRPDTTEAGLAK.[L]		1	RecPY14His	RecPY14His	0	3	1	0	1	1	529.926	1587.76	1587.76	0.96	0.00051	HCD (High Energy Collision Dissociation)	MS2	0	200	36.6247	11728	PY14_273_109186_PY14-20_A725-20200724_3.raw	F2		32	1	13	13	0.000122744	75642656	36.76
		FALSE	Medium	Sequest HT (A3)	Unambiguous	[K].DEANRPDTTEAGLAK.[L]		1	RecPY14His	RecPY14His	0	3	1	0	1	1	529.925	1587.76	1587.76	0.5	0.00026	HCD (High Energy Collision Dissociation)	MS2	7.62373	184.419	51.9756	15695	PY14_273_109186_PY14-20_A725-20200724_3.raw	F2	1.9		1
		FALSE	Medium	Sequest HT (A3)	Unambiguous	[K].DEANRPDTTEAGLAK.[L]		1	RecPY14His	RecPY14His	0	3	1	0	1	1	529.926	1587.76	1587.76	0.73	0.00038	HCD (High Energy Collision Dissociation)	MS2	10.3061	200	34.6217	11048	PY14_273_109186_PY14-20_A725-20200724_3.raw	F2	1.83		1
		FALSE	High	Mascot (A5)	Unambiguous	[K].DEANRPDTTEAGLAK.[L]		1	RecPY14His	RecPY14His	0	3	1	0	1	1	529.925	1587.76	1587.76	0.61	0.00032	HCD (High Energy Collision Dissociation)	MS2	33.6996	72.003	42.4781	13621	PY14_257_109481_P14_A725_20201216_1.raw	F1		19	1	13	13	0.00268534	65102584	42.49
		FALSE	High	Mascot (A5)	Unambiguous	[K].DEANRPDTTEAGLAK.[L]		1	RecPY14His	RecPY14His	0	3	1	0	1	1	529.925	1587.76	1587.76	0.61	0.00032	HCD (High Energy Collision Dissociation)	MS2	1.26756	200	62.5194	18550	PY14_257_109481_P14_A725_20201216_1.raw	F1		45	1	13	13	6.95024e-06	119824	62.19
		FALSE	High	Mascot (A5)	Unambiguous	[K].DEANRPDTTEAGLAK.[L]		1	RecPY14His	RecPY14His	0	3	1	0	1	1	529.925	1587.76	1587.76	0.61	0.00032	HCD (High Energy Collision Dissociation)	MS2	1.82193	200	65.1015	19082	PY14_257_109481_P14_A725_20201216_1.raw	F1		54	1	13	13	8.59014e-07	137909	65.51
		FALSE	Medium	Sequest HT (A3)	Selected	[K].DEANRPDTTEAGLAK.[L]		1	RecPY14His	RecPY14His	0	3	1	0	1	1	529.925	1587.76	1587.76	0.03	2e-05	HCD (High Energy Collision Dissociation)	MS2	46.0608	105.677	29.4363	9270	PY14_273_109186_PY14-20_A725-20200724_3.raw	F2	1.51		1
		FALSE	High	Mascot (A5)	Unambiguous	[K].DEANRPDTTEAGLAK.[L]		1	RecPY14His	RecPY14His	0	3	1	0	1	1	529.926	1587.76	1587.76	0.73	0.00038	HCD (High Energy Collision Dissociation)	MS2	24.0508	192.186	29.7167	9366	PY14_273_109186_PY14-20_A725-20200724_3.raw	F2		32	1	13	13	0.000114025	39260428	29.66
		FALSE	High	Mascot (A5)	Unambiguous	[K].DEANRPDTTEAGLAK.[L]		1	RecPY14His	RecPY14His	0	3	1	0	1	1	529.926	1587.76	1587.76	0.73	0.00038	HCD (High Energy Collision Dissociation)	MS2	29.3418	40.796	25.792	6941	PY14_257_109481_P14_A725_20201216_1.raw	F1		26	1	13	13	0.000509331	167181488	25.69
		FALSE	Medium	Sequest HT (A3)	Unambiguous	[K].DEANRPDTTEAGLAK.[L]		1	RecPY14His	RecPY14His	0	2	1	0	1	1	794.388	1587.77	1587.76	4.46	0.00354	HCD (High Energy Collision Dissociation)	MS2	37.4243	200	44.6927	14309	PY14_257_109481_P14_A725_20201216_1.raw	F1	0.93		1
		FALSE	Medium	Sequest HT (A3)	Unambiguous	[K].DEANRPDTTEAGLAK.[L]		1	RecPY14His	RecPY14His	0	2	1	0	1	1	794.385	1587.76	1587.76	1	0.0008	HCD (High Energy Collision Dissociation)	MS2	16.7827	200	56.9557	17358	PY14_257_109481_P14_A725_20201216_1.raw	F1	1.02		1
		FALSE	High	Mascot (A5)	Unambiguous	[K].DEANRPDTTEAGLAK.[L]		1	RecPY14His	RecPY14His	0	3	1	0	1	1	529.925	1587.76	1587.76	0.15	8e-05	HCD (High Energy Collision Dissociation)	MS2	47.2114	73.035	43.6196	13972	PY14_257_109481_P14_A725_20201216_1.raw	F1		33	1	13	13	0.000105196	30364786	43.59
		FALSE	High	Mascot (A5)	Unambiguous	[K].DEANRPDTTEAGLAK.[L]		1	RecPY14His	RecPY14His	0	2	1	0	1	1	794.382	1587.76	1587.76	-3.15	-0.0025	HCD (High Energy Collision Dissociation)	MS2	17.9784	144.304	24.3801	6361	PY14_257_109481_P14_A725_20201216_1.raw	F1		16	1	13	13	0.005236	115430408	24.53
		FALSE	High	Mascot (A5)	Unambiguous	[K].DEANRPDTTEAGLAK.[L]		1	RecPY14His	RecPY14His	0	3	1	0	1	1	529.925	1587.76	1587.76	0.15	8e-05	HCD (High Energy Collision Dissociation)	MS2	37.0966	114.362	46.5531	14852	PY14_257_109481_P14_A725_20201216_1.raw	F1		26	1	13	13	0.000502343	41931056	46.66
		FALSE	High	Sequest HT (A3)	Unambiguous	[K].DEANRPDTTEAGLAK.[L]		1	RecPY14His	RecPY14His	0	3	1	0	1	1	529.925	1587.76	1587.76	-0.08	-4e-05	HCD (High Energy Collision Dissociation)	MS2	10.5356	200	55.5423	17042	PY14_257_109481_P14_A725_20201216_1.raw	F1	2.84		1				5.06831e+06	55.52
		FALSE	High	Mascot (A5)	Unambiguous	[K].DEANRPDTTEAGLAK.[L]		1	RecPY14His	RecPY14His	0	2	1	0	1	1	794.385	1587.76	1587.76	1	0.0008	HCD (High Energy Collision Dissociation)	MS2	16.7827	200	56.9557	17358	PY14_257_109481_P14_A725_20201216_1.raw	F1		15	1	13	13	0.00706318
		FALSE	High	Mascot (A5)	Unambiguous	[K].DEANRPDTTEAGLAK.[L]		1	RecPY14His	RecPY14His	0	3	1	0	1	1	529.926	1587.76	1587.76	0.96	0.00051	HCD (High Energy Collision Dissociation)	MS2	0	190.613	32.5247	10333	PY14_273_109186_PY14-20_A725-20200724_3.raw	F2		31	1	13	13	0.000149279
		FALSE	High	Sequest HT (A3)	Unambiguous	[K].DEANRPDTTEAGLAK.[L]		1	RecPY14His	RecPY14His	0	3	1	0	1	1	529.925	1587.76	1587.76	0.27	0.00014	HCD (High Energy Collision Dissociation)	MS2	2.34216	200	56.8259	17326	PY14_257_109481_P14_A725_20201216_1.raw	F1	2.68		1				1.06668e+06	56.78
		FALSE	High	Mascot (A5)	Unambiguous	[K].DEANRPDTTEAGLAK.[L]		1	RecPY14His	RecPY14His	0	3	1	0	1	1	529.925	1587.76	1587.76	0.38	0.0002	HCD (High Energy Collision Dissociation)	MS2	5.65056	200	56.1742	16718	PY14_273_109186_PY14-20_A725-20200724_3.raw	F2		16	1	13	13	0.0052723	4253940	55.98
		FALSE	High	Mascot (A5)	Unambiguous	[K].DEANRPDTTEAGLAK.[L]		1	RecPY14His	RecPY14His	0	3	1	0	1	1	529.925	1587.76	1587.76	0.27	0.00014	HCD (High Energy Collision Dissociation)	MS2	47.9341	125.36	27.4336	8523	PY14_273_109186_PY14-20_A725-20200724_3.raw	F2		28	1	13	13	0.000317687	196747840	27.29
		FALSE	High	Mascot (A5)	Unambiguous	[K].DEANRPDTTEAGLAK.[L]		1	RecPY14His	RecPY14His	0	3	1	0	1	1	529.925	1587.76	1587.76	0.38	0.0002	HCD (High Energy Collision Dissociation)	MS2	4.02039	200	58.1171	17613	PY14_257_109481_P14_A725_20201216_1.raw	F1		40	1	13	13	2.18273e-05	776070	58.12
		FALSE	High	Mascot (A5)	Unambiguous	[K].DEANRPDTTEAGLAK.[L]		1	RecPY14His	RecPY14His	0	3	1	0	1	1	529.925	1587.76	1587.76	0.38	0.0002	HCD (High Energy Collision Dissociation)	MS2	3.25062	200	58.3741	17670	PY14_257_109481_P14_A725_20201216_1.raw	F1		48	1	13	13	3.45144e-06	271766	58.5
		FALSE	High	Mascot (A5)	Unambiguous	[K].DEANRPDTTEAGLAK.[L]		1	RecPY14His	RecPY14His	0	3	1	0	1	1	529.925	1587.76	1587.76	0.38	0.0002	HCD (High Energy Collision Dissociation)	MS2	3.08004	200	58.6359	17727	PY14_257_109481_P14_A725_20201216_1.raw	F1		43	1	13	13	1.08143e-05	443705	58.58
		FALSE	High	Mascot (A5)	Unambiguous	[K].DEANRPDTTEAGLAK.[L]		1	RecPY14His	RecPY14His	0	3	1	0	1	1	529.925	1587.76	1587.76	0.27	0.00014	HCD (High Energy Collision Dissociation)	MS2	3.61442	200	58.8918	17783	PY14_257_109481_P14_A725_20201216_1.raw	F1		52	1	13	13	1.13501e-06	432200	58.84
		FALSE	Medium	Sequest HT (A3)	Unambiguous	[K].DEANRPDTTEAGLAK.[L]		1	RecPY14His	RecPY14His	0	3	1	0	1	1	529.925	1587.76	1587.76	0.15	8e-05	HCD (High Energy Collision Dissociation)	MS2	9.60514	200	46.2893	14334	PY14_273_109186_PY14-20_A725-20200724_3.raw	F2	1.2		1
		FALSE	Medium	Sequest HT (A3)	Unambiguous	[K].DEANRPDTTEAGLAK.[L]		1	RecPY14His	RecPY14His	0	3	1	0	1	1	529.925	1587.76	1587.76	0.5	0.00026	HCD (High Energy Collision Dissociation)	MS2	18.9102	188.553	31.8083	10082	PY14_273_109186_PY14-20_A725-20200724_3.raw	F2	2.12		1
		FALSE	Medium	Sequest HT (A3)	Unambiguous	[K].DEANRPDTTEAGLAK.[L]		1	RecPY14His	RecPY14His	0	3	1	0	1	1	529.925	1587.76	1587.76	0.15	8e-05	HCD (High Energy Collision Dissociation)	MS2	30.2071	200	44.6045	13895	PY14_273_109186_PY14-20_A725-20200724_3.raw	F2	1.63		1
		FALSE	High	Mascot (A5)	Unambiguous	[K].DEANRPDTTEAGLAK.[L]		1	RecPY14His	RecPY14His	0	3	1	0	1	1	529.925	1587.76	1587.76	0.38	0.0002	HCD (High Energy Collision Dissociation)	MS2	3.18481	200	60.6936	18170	PY14_257_109481_P14_A725_20201216_1.raw	F1		31	1	13	13	0.00016788	185967	61.01
		FALSE	High	Mascot (A5)	Unambiguous	[K].DEANRPDTTEAGLAK.[L]		1	RecPY14His	RecPY14His	0	3	1	0	1	1	529.925	1587.76	1587.76	0.38	0.0002	HCD (High Energy Collision Dissociation)	MS2	4.3006	200	59.1538	17840	PY14_257_109481_P14_A725_20201216_1.raw	F1		47	1	13	13	3.58096e-06	82940.6	58.76
		FALSE	High	Mascot (A5)	Unambiguous	[K].DEANRPDTTEAGLAK.[L]		1	RecPY14His	RecPY14His	0	3	1	0	1	1	529.925	1587.76	1587.76	0.38	0.0002	HCD (High Energy Collision Dissociation)	MS2	2.24939	200	60.4352	18114	PY14_257_109481_P14_A725_20201216_1.raw	F1		41	1	13	13	1.45546e-05	183844	60.6
		FALSE	Medium	Sequest HT (A3)	Unambiguous	[K].DEANRPDTTEAGLAK.[L]		1	RecPY14His	RecPY14His	0	3	1	0	1	1	529.925	1587.76	1587.76	0.27	0.00014	HCD (High Energy Collision Dissociation)	MS2	17.8537	200	46.0316	14267	PY14_273_109186_PY14-20_A725-20200724_3.raw	F2	1.39		1
		FALSE	High	Mascot (A5)	Unambiguous	[K].DEANRPDTTEAGLAK.[L]		1	RecPY14His	RecPY14His	0	3	1	0	1	1	529.925	1587.76	1587.76	0.27	0.00014	HCD (High Energy Collision Dissociation)	MS2	3.11405	200	57.0842	17385	PY14_257_109481_P14_A725_20201216_1.raw	F1		44	1	13	13	7.34514e-06	1.7498e+06	57.01
		FALSE	High	Mascot (A5)	Unambiguous	[K].DEANRPDTTEAGLAK.[L]		1	RecPY14His	RecPY14His	0	3	1	0	1	1	529.925	1587.76	1587.76	0.38	0.0002	HCD (High Energy Collision Dissociation)	MS2	1.50476	200	59.6615	17949	PY14_257_109481_P14_A725_20201216_1.raw	F1		35	1	13	13	6.01174e-05	297643	59.87
		FALSE	High	Mascot (A5)	Unambiguous	[K].DEANRPDTTEAGLAK.[L]		1	RecPY14His	RecPY14His	0	2	1	0	1	1	794.38	1587.75	1587.76	-5.15	-0.00409	HCD (High Energy Collision Dissociation)	MS2	0	100.6	22.8365	5691	PY14_257_109481_P14_A725_20201216_1.raw	F1		44	1	13	13	8.26038e-06	111718984	22.99
		FALSE	High	Mascot (A5)	Unambiguous	[K].DEANRPDTTEAGLAK.[L]		1	RecPY14His	RecPY14His	0	3	1	0	1	1	529.925	1587.76	1587.76	0.38	0.0002	HCD (High Energy Collision Dissociation)	MS2	4.8317	200	60.1785	18059	PY14_257_109481_P14_A725_20201216_1.raw	F1		33	1	13	13	0.000105196	392123	60.09
		FALSE	High	Mascot (A5)	Unambiguous	[K].DEANRPDTTEAGLAK.[L]		1	RecPY14His	RecPY14His	0	3	1	0	1	1	529.925	1587.76	1587.76	0.27	0.00014	HCD (High Energy Collision Dissociation)	MS2	29.875	65.813	45.0796	14424	PY14_257_109481_P14_A725_20201216_1.raw	F1		30	1	13	13	0.000195434	63863872	45.28
		FALSE	High	Mascot (A5)	Unambiguous	[K].DEANRPDTTEAGLAK.[L]		1	RecPY14His	RecPY14His	0	3	1	0	1	1	529.925	1587.76	1587.76	0.27	0.00014	HCD (High Energy Collision Dissociation)	MS2	2.16932	200	54.7709	16881	PY14_257_109481_P14_A725_20201216_1.raw	F1		44	1	13	13	8.05378e-06	4406837	54.73
		FALSE	High	Mascot (A5)	Unambiguous	[K].DEANRPDTTEAGLAK.[L]		1	RecPY14His	RecPY14His	0	3	1	0	1	1	529.925	1587.76	1587.76	0.27	0.00014	HCD (High Energy Collision Dissociation)	MS2	2.34216	200	56.8259	17326	PY14_257_109481_P14_A725_20201216_1.raw	F1		42	1	13	13	1.35207e-05	1.06668e+06	56.78
		FALSE	High	Mascot (A5)	Unambiguous	[K].DEANRPDTTEAGLAK.[L]		1	RecPY14His	RecPY14His	0	3	1	0	1	1	529.925	1587.76	1587.76	0.27	0.00014	HCD (High Energy Collision Dissociation)	MS2	1.04454	200	54.5157	16820	PY14_257_109481_P14_A725_20201216_1.raw	F1		48	1	13	13	3.03389e-06	7294640	54.4
		FALSE	High	Sequest HT (A3)	Unambiguous	[K].DEANRPDTTEAGLAK.[L]		1	RecPY14His	RecPY14His	0	3	1	0	1	1	529.924	1587.76	1587.76	-2.16	-0.00114	HCD (High Energy Collision Dissociation)	MS2	63.4062	200	34.9661	10903	PY14_257_109481_P14_A725_20201216_1.raw	F1	3.12		1				16730228	34.93
		FALSE	High	Mascot (A5)	Unambiguous	[K].DEANRPDTTEAGLAK.[L]		1	RecPY14His	RecPY14His	0	3	1	0	1	1	529.925	1587.76	1587.76	0.27	0.00014	HCD (High Energy Collision Dissociation)	MS2	3.44871	200	57.8594	17557	PY14_257_109481_P14_A725_20201216_1.raw	F1		48	1	13	13	2.91743e-06	776070	58.12
		FALSE	High	Mascot (A5)	Unambiguous	[K].DEANRPDTTEAGLAK.[L]		1	RecPY14His	RecPY14His	0	3	1	0	1	1	529.925	1587.76	1587.76	0.27	0.00014	HCD (High Energy Collision Dissociation)	MS2	5.84043	200	61.741	18388	PY14_257_109481_P14_A725_20201216_1.raw	F1		38	1	13	13	3.40408e-05	267447	61.7
		FALSE	High	Mascot (A5)	Unambiguous	[K].DEANRPDTTEAGLAK.[L]		1	RecPY14His	RecPY14His	0	3	1	0	1	1	529.925	1587.76	1587.76	0.38	0.0002	HCD (High Energy Collision Dissociation)	MS2	5.84698	200	57.6011	17500	PY14_257_109481_P14_A725_20201216_1.raw	F1		48	1	13	13	2.87078e-06	1.33775e+06	57.29
		FALSE	High	Mascot (A5)	Unambiguous	[K].DEANRPDTTEAGLAK.[L]		1	RecPY14His	RecPY14His	0	3	1	0	1	1	529.923	1587.76	1587.76	-3.31	-0.00175	HCD (High Energy Collision Dissociation)	MS2	26.0787	135.277	27.3057	7676	PY14_257_109481_P14_A725_20201216_1.raw	F1		26	1	13	13	0.000462381	83960704	27.44
		FALSE	High	Mascot (A5)	Unambiguous	[K].DEANRPDTTEAGLAK.[L]		1	RecPY14His	RecPY14His	0	3	1	0	1	1	529.925	1587.76	1587.76	0.03	2e-05	HCD (High Energy Collision Dissociation)	MS2	0.810982	200	55.2854	16991	PY14_257_109481_P14_A725_20201216_1.raw	F1		39	1	13	13	2.7227e-05	4.77121e+06	55.18
		FALSE	High	Sequest HT (A3)	Unambiguous	[K].DEANRPDTTEAGLAK.[L]		1	RecPY14His	RecPY14His	0	3	1	0	1	1	529.925	1587.76	1587.76	0.03	2e-05	HCD (High Energy Collision Dissociation)	MS2	0	200	55.025	16938	PY14_257_109481_P14_A725_20201216_1.raw	F1	2.96		1				3.37632e+06	55
		FALSE	High	Mascot (A5)	Unambiguous	[K].DEANRPDTTEAGLAK.[L]		1	RecPY14His	RecPY14His	0	3	1	0	1	1	529.925	1587.76	1587.76	0.03	2e-05	HCD (High Energy Collision Dissociation)	MS2	0	200	55.025	16938	PY14_257_109481_P14_A725_20201216_1.raw	F1		41	1	13	13	1.65959e-05	3.37632e+06	55
		FALSE	High	Mascot (A5)	Unambiguous	[K].DEANRPDTTEAGLAK.[L]		1	RecPY14His	RecPY14His	0	3	1	0	1	1	529.925	1587.76	1587.76	0.03	2e-05	HCD (High Energy Collision Dissociation)	MS2	13.3575	200	55.8018	17095	PY14_257_109481_P14_A725_20201216_1.raw	F1		45	1	13	13	6.91831e-06	4476378	55.72
		FALSE	High	Mascot (A5)	Unambiguous	[K].DEANRPDTTEAGLAK.[L]		1	RecPY14His	RecPY14His	0	3	1	0	1	1	529.925	1587.76	1587.76	0.03	2e-05	HCD (High Energy Collision Dissociation)	MS2	35.6501	84.579	41.7854	13411	PY14_257_109481_P14_A725_20201216_1.raw	F1		40	1	13	13	1.93642e-05	44881244	41.67
		FALSE	High	Sequest HT (A3)	Unambiguous	[K].DEANRPDTTEAGLAK.[L]		1	RecPY14His	RecPY14His	0	2	1	0	1	1	794.383	1587.76	1587.76	-1.23	-0.00097	HCD (High Energy Collision Dissociation)	MS2	13.1287	200	53.3113	16510	PY14_257_109481_P14_A725_20201216_1.raw	F1	2.73		1				22674696	53.58
		FALSE	Medium	Sequest HT (A3)	Unambiguous	[K].DEANRPDTTEAGLAK.[L]		1	RecPY14His	RecPY14His	0	3	1	0	1	1	529.925	1587.76	1587.76	0.38	0.0002	HCD (High Energy Collision Dissociation)	MS2	1.844	200	59.2432	17350	PY14_273_109186_PY14-20_A725-20200724_3.raw	F2	1.02		1
		FALSE	High	Mascot (A5)	Unambiguous	[K].DEANRPDTTEAGLAK.[L]		1	RecPY14His	RecPY14His	0	3	1	0	1	1	529.925	1587.76	1587.76	0.03	2e-05	HCD (High Energy Collision Dissociation)	MS2	8.26696	30.923	24.3357	6342	PY14_257_109481_P14_A725_20201216_1.raw	F1		25	1	13	13	0.000676083	556389760	24.62
		FALSE	Medium	Sequest HT (A3)	Selected	[K].DEANRPDTTEAGLAK.[L]		1	RecPY14His	RecPY14His	0	3	1	0	1	1	529.925	1587.76	1587.76	0.03	2e-05	HCD (High Energy Collision Dissociation)	MS2	5.50252	200	55.6663	16605	PY14_273_109186_PY14-20_A725-20200724_3.raw	F2	1.18		1
		FALSE	High	Mascot (A5)	Unambiguous	[K].DEANRPDTTEAGLAK.[L]		1	RecPY14His	RecPY14His	0	3	1	0	1	1	529.925	1587.76	1587.76	0.15	8e-05	HCD (High Energy Collision Dissociation)	MS2	41.5382	82.048	43.3429	13886	PY14_257_109481_P14_A725_20201216_1.raw	F1		35	1	13	13	6.80769e-05	30364786	43.59
		FALSE	High	Mascot (A5)	Unambiguous	[K].DEANRPDTTEAGLAK.[L]		1	RecPY14His	RecPY14His	0	3	1	0	1	1	529.926	1587.76	1587.76	1.3	0.00069	HCD (High Energy Collision Dissociation)	MS2	13.9836	47.937	22.6446	6523	PY14_273_109186_PY14-20_A725-20200724_3.raw	F2		24	1	13	13	0.000874984	164377104	22.64
		FALSE	High	Mascot (A5)	Unambiguous	[K].DEANRPDTTEAGLAK.[L]		1	RecPY14His	RecPY14His	0	3	1	0	1	1	529.925	1587.76	1587.76	0.38	0.0002	HCD (High Energy Collision Dissociation)	MS2	3.59055	200	56.5673	17268	PY14_257_109481_P14_A725_20201216_1.raw	F1		47	1	13	13	3.6141e-06	2.74448e+06	56.47
		FALSE	High	Mascot (A5)	Unambiguous	[K].DEANRPDTTEAGLAK.[L]		1	RecPY14His	RecPY14His	0	3	1	0	1	1	529.925	1587.76	1587.76	0.27	0.00014	HCD (High Energy Collision Dissociation)	MS2	3.02947	200	59.4097	17895	PY14_257_109481_P14_A725_20201216_1.raw	F1		44	1	13	13	7.81628e-06	677800	59.32
		FALSE	High	Mascot (A5)	Unambiguous	[K].DEANRPDTTEAGLAK.[L]		1	RecPY14His	RecPY14His	0	3	1	0	1	1	529.925	1587.76	1587.76	0.38	0.0002	HCD (High Energy Collision Dissociation)	MS2	16.5995	200	45.4772	14124	PY14_273_109186_PY14-20_A725-20200724_3.raw	F2		17	1	13	13	0.00418794	4469878	45.89
		FALSE	High	Mascot (A5)	Unambiguous	[K].DEANRPDTTEAGLAK.[L]		1	RecPY14His	RecPY14His	0	2	1	0	1	1	794.381	1587.75	1587.76	-3.84	-0.00305	HCD (High Energy Collision Dissociation)	MS2	0	13.19	17.2862	3570	PY14_257_109481_P14_A725_20201216_1.raw	F1		83	1	13	13	1.03039e-09	174257668096	16.23
		FALSE	High	Mascot (A5)	Unambiguous	[K].DEANRPDTTEAGLAK.[L]		1	RecPY14His	RecPY14His	0	3	1	0	1	1	529.925	1587.76	1587.76	0.38	0.0002	HCD (High Energy Collision Dissociation)	MS2	4.58469	200	37.7755	12066	PY14_273_109186_PY14-20_A725-20200724_3.raw	F2		34	1	13	13	8.6896e-05	28984758	37.91
		FALSE	High	Mascot (A5)	Unambiguous	[K].DEANRPDTTEAGLAK.[L]		1	RecPY14His	RecPY14His	0	3	1	0	1	1	529.925	1587.76	1587.76	0.38	0.0002	HCD (High Energy Collision Dissociation)	MS2	0	200	69.7295	20024	PY14_257_109481_P14_A725_20201216_1.raw	F1		35	1	13	13	6.47143e-05	160026	69.72
		FALSE	High	Mascot (A5)	Unambiguous	[K].DEANRPDTTEAGLAK.[L]		1	RecPY14His	RecPY14His	0	3	1	0	1	1	529.925	1587.76	1587.76	0.27	0.00014	HCD (High Energy Collision Dissociation)	MS2	41.387	200	47.4635	15108	PY14_257_109481_P14_A725_20201216_1.raw	F1		15	1	13	13	0.00657658	35319080	47.23
		FALSE	High	Mascot (A5)	Unambiguous	[K].DEANRPDTTEAGLAK.[L]		1	RecPY14His	RecPY14His	0	2	1	0	1	1	794.384	1587.76	1587.76	0.31	0.00025	HCD (High Energy Collision Dissociation)	MS2	0	200	55.9302	17125	PY14_257_109481_P14_A725_20201216_1.raw	F1		24	1	13	13	0.00076913	970710	55.47
		FALSE	High	Mascot (A5)	Unambiguous	[K].DEANRPDTTEAGLAK.[L]		1	RecPY14His	RecPY14His	0	3	1	0	1	1	529.925	1587.76	1587.76	0.38	0.0002	HCD (High Energy Collision Dissociation)	MS2	5.59975	200	54.6159	16355	PY14_273_109186_PY14-20_A725-20200724_3.raw	F2		25	1	13	13	0.00065013	54197104	53.87
		FALSE	High	Mascot (A5)	Unambiguous	[K].DEANRPDTTEAGLAK.[L]		1	RecPY14His	RecPY14His	0	3	1	0	1	1	529.925	1587.76	1587.76	0.38	0.0002	HCD (High Energy Collision Dissociation)	MS2	2.90419	200	55.3809	16535	PY14_273_109186_PY14-20_A725-20200724_3.raw	F2		18	1	13	13	0.00341979	11701223	55
		FALSE	High	Mascot (A5)	Unambiguous	[K].DEANRPDTTEAGLAK.[L]		1	RecPY14His	RecPY14His	0	3	1	0	1	1	529.923	1587.76	1587.76	-3.66	-0.00193	HCD (High Energy Collision Dissociation)	MS2	19.647	11.873	21.7072	5187	PY14_257_109481_P14_A725_20201216_1.raw	F1		43	1	13	13	1.05925e-05	859509504	21.99
		FALSE	High	Mascot (A5)	Unambiguous	[K].DEANRPDTTEAGLAK.[L]		1	RecPY14His	RecPY14His	0	3	1	0	1	1	529.925	1587.76	1587.76	0.38	0.0002	HCD (High Energy Collision Dissociation)	MS2	10.6067	200	40.3459	12765	PY14_273_109186_PY14-20_A725-20200724_3.raw	F2		28	1	13	13	0.000285102	29576764	40.6
		FALSE	High	Mascot (A5)	Unambiguous	[K].DEANRPDTTEAGLAK.[L]		1	RecPY14His	RecPY14His	0	3	1	0	1	1	529.925	1587.76	1587.76	0.38	0.0002	HCD (High Energy Collision Dissociation)	MS2	8.19596	200	55.1246	16476	PY14_273_109186_PY14-20_A725-20200724_3.raw	F2		17	1	13	13	0.00366438	11701223	55
		FALSE	High	Mascot (A5)	Unambiguous	[K].DEANRPDTTEAGLAK.[L]		1	RecPY14His	RecPY14His	0	3	1	0	1	1	529.923	1587.76	1587.76	-3.66	-0.00193	HCD (High Energy Collision Dissociation)	MS2	0	54.57	23.0804	5799	PY14_257_109481_P14_A725_20201216_1.raw	F1		34	1	13	13	8.09096e-05	362481664	23.13
		FALSE	High	Mascot (A5)	Unambiguous	[K].DEANRPDTTEAGLAK.[L]		1	RecPY14His	RecPY14His	0	2	1	0	1	1	794.381	1587.76	1587.76	-3.38	-0.00268	HCD (High Energy Collision Dissociation)	MS2	27.2927	103.15	20.1107	5460	PY14_273_109186_PY14-20_A725-20200724_3.raw	F2		19	1	13	13	0.00262422
		FALSE	High	Mascot (A5)	Unambiguous	[K].DEANRPDTTEAGLAK.[L]		1	RecPY14His	RecPY14His	0	3	1	0	1	1	529.925	1587.76	1587.76	0.38	0.0002	HCD (High Energy Collision Dissociation)	MS2	7.41739	200	61.308	17769	PY14_273_109186_PY14-20_A725-20200724_3.raw	F2		14	1	13	13	0.00714496	380723	60.85
		FALSE	High	Mascot (A5)	Selected	[K].DEANRPDTTEAGLAK.[L]		1	RecPY14His	RecPY14His	0	3	1	0	1	1	529.925	1587.76	1587.76	0.38	0.0002	HCD (High Energy Collision Dissociation)	MS2	1.67166	200	52.243	15764	PY14_273_109186_PY14-20_A725-20200724_3.raw	F2		17	1	13	13	0.00412098	11407291	52
		FALSE	Medium	Sequest HT (A3)	Unambiguous	[K].DEANRPDTTEAGLAK.[L]		1	RecPY14His	RecPY14His	0	3	1	0	1	1	529.925	1587.76	1587.76	0.38	0.0002	HCD (High Energy Collision Dissociation)	MS2	19.6338	200	45.1721	14042	PY14_273_109186_PY14-20_A725-20200724_3.raw	F2	1.17		1
		FALSE	High	Mascot (A5)	Unambiguous	[K].DEANRPDTTEAGLAK.[L]		1	RecPY14His	RecPY14His	0	3	1	0	1	1	529.925	1587.76	1587.76	0.38	0.0002	HCD (High Energy Collision Dissociation)	MS2	6.16036	200	56.6872	16828	PY14_273_109186_PY14-20_A725-20200724_3.raw	F2		22	1	13	13	0.00133352	3.38226e+06	56.59
		FALSE	High	Mascot (A5)	Unambiguous	[K].DEANRPDTTEAGLAK.[L]		1	RecPY14His	RecPY14His	0	3	1	0	1	1	529.925	1587.76	1587.76	0.38	0.0002	HCD (High Energy Collision Dissociation)	MS2	1.844	200	59.2432	17350	PY14_273_109186_PY14-20_A725-20200724_3.raw	F2		16	1	13	13	0.0055335	881937	59.11
		FALSE	High	Mascot (A5)	Unambiguous	[K].DEANRPDTTEAGLAK.[L]		1	RecPY14His	RecPY14His	0	2	1	0	1	1	794.381	1587.76	1587.76	-3.45	-0.00274	HCD (High Energy Collision Dissociation)	MS2	0	77.623	16.1539	3922	PY14_273_109186_PY14-20_A725-20200724_3.raw	F2		64	1	13	13	7.4817e-08	497934592	16.19
		FALSE	High	Mascot (A5)	Unambiguous	[K].DEANRPDTTEAGLAK.[L]		1	RecPY14His	RecPY14His	0	2	1	0	1	1	794.381	1587.75	1587.76	-3.92	-0.00311	HCD (High Energy Collision Dissociation)	MS2	0.220171	2.428	14.749	3420	PY14_273_109186_PY14-20_A725-20200724_3.raw	F2		74	1	13	13	8.47227e-09	3062827776	14.74
		FALSE	High	Mascot (A5)	Unambiguous	[K].DEANRPDTTEAGLAK.[L]		1	RecPY14His	RecPY14His	0	3	1	0	1	1	529.925	1587.76	1587.76	0.38	0.0002	HCD (High Energy Collision Dissociation)	MS2	0	200	13.5197	2504	PY14_257_109481_P14_A725_20201216_1.raw	F1		18	1	13	13	0.0032434	2.24695e+06	13.56
		FALSE	High	Mascot (A5)	Unambiguous	[K].DEANRPDTTEAGLAK.[L]		1	RecPY14His	RecPY14His	0	3	1	0	1	1	529.925	1587.76	1587.76	0.38	0.0002	HCD (High Energy Collision Dissociation)	MS2	1.63302	200	61.4785	18335	PY14_257_109481_P14_A725_20201216_1.raw	F1		40	1	13	13	1.96336e-05	109469	61.63
		FALSE	High	Mascot (A5)	Unambiguous	[K].DEANRPDTTEAGLAK.[L]		1	RecPY14His	RecPY14His	0	3	1	0	1	1	529.925	1587.76	1587.76	0.27	0.00014	HCD (High Energy Collision Dissociation)	MS2	54.5299	78.116	44.743	14325	PY14_257_109481_P14_A725_20201216_1.raw	F1		22	1	13	13	0.00116413	65707772	44.89
		FALSE	High	Mascot (A5)	Unambiguous	[K].DEANRPDTTEAGLAK.[L]		1	RecPY14His	RecPY14His	0	3	1	0	1	1	529.925	1587.76	1587.76	0.27	0.00014	HCD (High Energy Collision Dissociation)	MS2	1.7562	200	63.5513	18765	PY14_257_109481_P14_A725_20201216_1.raw	F1		30	1	13	13	0.000198153	245742	63.5
		FALSE	Medium	Sequest HT (A3)	Unambiguous	[K].DEANRPDTTEAGLAK.[L]		1	RecPY14His	RecPY14His	0	3	1	0	1	1	529.925	1587.76	1587.76	-0.66	-0.00035	HCD (High Energy Collision Dissociation)	MS2	3.58135	182.945	31.2174	9888	PY14_273_109186_PY14-20_A725-20200724_3.raw	F2	1.92		1
		FALSE	High	Mascot (A5)	Unambiguous	[K].DEANRPDTTEAGLAK.[L]		1	RecPY14His	RecPY14His	0	3	1	0	1	1	529.925	1587.76	1587.76	0.38	0.0002	HCD (High Energy Collision Dissociation)	MS2	1.86211	123.82	53.4605	16551	PY14_257_109481_P14_A725_20201216_1.raw	F1		46	1	13	13	5.236e-06	199217904	53.73
		FALSE	Medium	Sequest HT (A3)	Unambiguous	[K].DEANRPDTTEAGLAK.[L]		1	RecPY14His	RecPY14His	0	3	1	0	1	1	529.925	1587.76	1587.76	-0.08	-4e-05	HCD (High Energy Collision Dissociation)	MS2	14.7232	200	46.5492	14400	PY14_273_109186_PY14-20_A725-20200724_3.raw	F2	1.06		1
		FALSE	High	Mascot (A5)	Unambiguous	[K].DEANRPDTTEAGLAK.[L]		1	RecPY14His	RecPY14His	0	3	1	0	1	1	529.925	1587.76	1587.76	0.27	0.00014	HCD (High Energy Collision Dissociation)	MS2	4.19092	200	62.0035	18444	PY14_257_109481_P14_A725_20201216_1.raw	F1		44	1	13	13	8.531e-06	185373	61.99
		FALSE	High	Mascot (A5)	Unambiguous	[K].DEANRPDTTEAGLAK.[L]		1	RecPY14His	RecPY14His	0	3	1	0	1	1	529.925	1587.76	1587.76	0.38	0.0002	HCD (High Energy Collision Dissociation)	MS2	3.55321	200	56.0552	17152	PY14_257_109481_P14_A725_20201216_1.raw	F1		39	1	13	13	2.44343e-05	2206224	56.21
		FALSE	High	Mascot (A5)	Unambiguous	[K].DEANRPDTTEAGLAK.[L]		1	RecPY14His	RecPY14His	0	3	1	0	1	1	529.925	1587.76	1587.76	0.38	0.0002	HCD (High Energy Collision Dissociation)	MS2	1.44898	112.655	53.7347	16625	PY14_257_109481_P14_A725_20201216_1.raw	F1		53	1	13	13	1.04954e-06	199217904	53.73
		FALSE	High	Mascot (A5)	Unambiguous	[K].DEANRPDTTEAGLAK.[L]		1	RecPY14His	RecPY14His	0	3	1	0	1	1	529.922	1587.75	1587.76	-5.5	-0.00291	HCD (High Energy Collision Dissociation)	MS2	0	114.082	27.5852	7808	PY14_257_109481_P14_A725_20201216_1.raw	F1		30	1	13	13	0.00020893	83960704	27.44
		FALSE	High	Mascot (A5)	Unambiguous	[K].DEANRPDTTEAGLAK.[L]		1	RecPY14His	RecPY14His	0	3	1	0	1	1	529.925	1587.76	1587.76	0.38	0.0002	HCD (High Energy Collision Dissociation)	MS2	2.22019	200	52.8951	16402	PY14_257_109481_P14_A725_20201216_1.raw	F1		46	1	13	13	5.22396e-06	199217904	53.73
		FALSE	High	Mascot (A5)	Unambiguous	[K].DEANRPDTTEAGLAK.[L]		1	RecPY14His	RecPY14His	0	3	1	0	1	1	529.925	1587.76	1587.76	0.27	0.00014	HCD (High Energy Collision Dissociation)	MS2	3.32149	200	64.5861	18976	PY14_257_109481_P14_A725_20201216_1.raw	F1		31	1	13	13	0.000174985	152781	64.44
		FALSE	High	Sequest HT (A3)	Unambiguous	[K].DEANRPDTTEAGLAK.[L]		1	RecPY14His	RecPY14His	0	3	1	0	1	1	529.925	1587.76	1587.76	0.38	0.0002	HCD (High Energy Collision Dissociation)	MS2	3.55321	200	56.0552	17152	PY14_257_109481_P14_A725_20201216_1.raw	F1	2.66		1				2206224	56.21
		FALSE	High	Mascot (A5)	Unambiguous	[K].DEANRPDTTEAGLAK.[L]		1	RecPY14His	RecPY14His	0	3	1	0	1	1	529.925	1587.76	1587.76	0.38	0.0002	HCD (High Energy Collision Dissociation)	MS2	6.03997	200	52.6351	16334	PY14_257_109481_P14_A725_20201216_1.raw	F1		46	1	13	13	4.54988e-06	106340992	51.82
		FALSE	High	Mascot (A5)	Unambiguous	[K].DEANRPDTTEAGLAK.[L]		1	RecPY14His	RecPY14His	0	3	1	0	1	1	529.925	1587.76	1587.76	0.27	0.00014	HCD (High Energy Collision Dissociation)	MS2	1.89512	200	61.2134	18280	PY14_257_109481_P14_A725_20201216_1.raw	F1		33	1	13	13	0.00010617	185967	61.01
		FALSE	Medium	Sequest HT (A3)	Unambiguous	[K].DEANRPDTTEAGLAK.[L]		1	RecPY14His	RecPY14His	0	3	1	0	1	1	529.925	1587.76	1587.76	-0.31	-0.00016	HCD (High Energy Collision Dissociation)	MS2	0	200	33.8838	10800	PY14_273_109186_PY14-20_A725-20200724_3.raw	F2	1.54		1
		FALSE	High	Mascot (A5)	Unambiguous	[K].DEANRPDTTEAGLAK.[L]		1	RecPY14His	RecPY14His	0	3	1	0	1	1	529.925	1587.76	1587.76	0.38	0.0002	HCD (High Energy Collision Dissociation)	MS2	4.16185	200	56.3143	17211	PY14_257_109481_P14_A725_20201216_1.raw	F1		46	1	13	13	4.59198e-06	2.69133e+06	56.32
		FALSE	Medium	Sequest HT (A3)	Unambiguous	[K].DEANRPDTTEAGLAK.[L]		1	RecPY14His	RecPY14His	0	3	1	0	1	1	529.925	1587.76	1587.76	-0.43	-0.00023	HCD (High Energy Collision Dissociation)	MS2	16.1719	186.424	31.5292	9992	PY14_273_109186_PY14-20_A725-20200724_3.raw	F2	2.29		1
		FALSE	High	Sequest HT (A3)	Unambiguous	[K].DEANRPDTTEAGLAK.[L]		1	RecPY14His	RecPY14His	0	3	1	0	1	1	529.925	1587.76	1587.76	0.38	0.0002	HCD (High Energy Collision Dissociation)	MS2	4.16185	200	56.3143	17211	PY14_257_109481_P14_A725_20201216_1.raw	F1	2.58		1				2.69133e+06	56.32
		FALSE	High	Mascot (A5)	Unambiguous	[K].DEANRPDTTEAGLAK.[L]		1	RecPY14His	RecPY14His	0	3	1	0	1	1	529.925	1587.76	1587.76	0.27	0.00014	HCD (High Energy Collision Dissociation)	MS2	0	200	66.642	19398	PY14_257_109481_P14_A725_20201216_1.raw	F1		38	1	13	13	3.36512e-05	395281	66.66
		FALSE	High	Mascot (A5)	Unambiguous	[K].DEANRPDTTEAGLAK.[L]		1	RecPY14His	RecPY14His	0	3	1	0	1	1	529.925	1587.76	1587.76	0.27	0.00014	HCD (High Energy Collision Dissociation)	MS2	24.6082	200	39.2024	12457	PY14_273_109186_PY14-20_A725-20200724_3.raw	F2		25	1	13	13	0.000701455	49712240	39.82
		FALSE	High	Sequest HT (A3)	Unambiguous	[K].DEANRPDTTEAGLAK.[L]		1	RecPY14His	RecPY14His	0	3	1	0	1	1	529.924	1587.76	1587.76	-2.04	-0.00108	HCD (High Energy Collision Dissociation)	MS2	1.33514	5.089	19.1756	4198	PY14_257_109481_P14_A725_20201216_1.raw	F1	3.01		1				2022556416	19.16
	FALSE	High	[K].DEANRPDTTEAGLAKLRPAFR.[K]		1	1	14	RecPY14His	RecPY14His [217-237]		1	2328.21	High	High	High	High	5.05	35
		Checked	Confidence	Identifying Node	PSM Ambiguity	Annotated Sequence	Modifications	# Proteins	Master Protein Accessions	Protein Accessions	# Missed Cleavages	Charge	DeltaScore	DeltaCn	Rank	Search Engine Rank	m/z [Da]	MH+ [Da]	Theo. MH+ [Da]	DeltaM [ppm]	Deltam/z [Da]	Activation Type	MS Order	Isolation Interference [%]	Ion Inject Time [ms]	RT [min]	First Scan	Spectrum File	File ID	XCorr	Ions Score	# Protein Groups	Identity Strict	Identity Relaxed	Expectation Value	Precursor Abundance	Apex RT [min]
		FALSE	High	Sequest HT (A3)	Unambiguous	[K].DEANRPDTTEAGLAKLRPAFR.[K]		1	RecPY14His	RecPY14His	1	3	1	0	1	1	776.737	2328.2	2328.21	-3.33	-0.00258	HCD (High Energy Collision Dissociation)	MS2	0	103.757	22.1756	5381	PY14_257_109481_P14_A725_20201216_1.raw	F1	2.44		1				51546448	22.19
		FALSE	Medium	Sequest HT (A3)	Unambiguous	[K].DEANRPDTTEAGLAKLRPAFR.[K]		1	RecPY14His	RecPY14His	1	5	1	0	1	1	466.446	2328.2	2328.21	-2.59	-0.00121	HCD (High Energy Collision Dissociation)	MS2	34.3211	8.527	20.531	5641	PY14_273_109186_PY14-20_A725-20200724_3.raw	F2	2.37		1
		FALSE	High	Mascot (A5)	Unambiguous	[K].DEANRPDTTEAGLAKLRPAFR.[K]		1	RecPY14His	RecPY14His	1	4	1	0	1	1	582.808	2328.21	2328.21	2.3	0.00134	HCD (High Energy Collision Dissociation)	MS2	0	81.783	20.4827	5620	PY14_273_109186_PY14-20_A725-20200724_3.raw	F2		29	1	13	13	0.00022751	621423168	20.64
		FALSE	High	Mascot (A5)	Unambiguous	[K].DEANRPDTTEAGLAKLRPAFR.[K]		1	RecPY14His	RecPY14His	1	5	1	0	1	1	466.446	2328.2	2328.21	-1.42	-0.00066	HCD (High Energy Collision Dissociation)	MS2	6.67658	21.416	20.814	5768	PY14_273_109186_PY14-20_A725-20200724_3.raw	F2		21	1	13	13	0.00166341	720375936	20.64
		FALSE	Medium	Sequest HT (A3)	Unambiguous	[K].DEANRPDTTEAGLAKLRPAFR.[K]		1	RecPY14His	RecPY14His	1	5	1	0	1	1	466.446	2328.2	2328.21	-1.42	-0.00066	HCD (High Energy Collision Dissociation)	MS2	6.67658	21.416	20.814	5768	PY14_273_109186_PY14-20_A725-20200724_3.raw	F2	2.29		1
		FALSE	High	Sequest HT (A3)	Selected	[K].DEANRPDTTEAGLAKLRPAFR.[K]		1	RecPY14His	RecPY14His	1	4	1	0	1	1	582.805	2328.2	2328.21	-2.63	-0.00153	HCD (High Energy Collision Dissociation)	MS2	11.5233	18.232	20.7575	5746	PY14_273_109186_PY14-20_A725-20200724_3.raw	F2	2.91		1				621423168	20.64
		FALSE	High	Sequest HT (A3)	Unambiguous	[K].DEANRPDTTEAGLAKLRPAFR.[K]		1	RecPY14His	RecPY14His	1	4	1	0	1	1	582.808	2328.21	2328.21	2.3	0.00134	HCD (High Energy Collision Dissociation)	MS2	0	81.783	20.4827	5620	PY14_273_109186_PY14-20_A725-20200724_3.raw	F2	5.05		1				621423168	20.64
		FALSE	High	Sequest HT (A3)	Unambiguous	[K].DEANRPDTTEAGLAKLRPAFR.[K]		1	RecPY14His	RecPY14His	1	4	1	0	1	1	582.804	2328.19	2328.21	-5.25	-0.00306	HCD (High Energy Collision Dissociation)	MS2	17.0408	26.698	22.1411	5363	PY14_257_109481_P14_A725_20201216_1.raw	F1	4.27		1				451062912	22.19
		FALSE	High	Mascot (A5)	Unambiguous	[K].DEANRPDTTEAGLAKLRPAFR.[K]		1	RecPY14His	RecPY14His	1	4	1	0	1	1	582.804	2328.19	2328.21	-5.25	-0.00306	HCD (High Energy Collision Dissociation)	MS2	17.0408	26.698	22.1411	5363	PY14_257_109481_P14_A725_20201216_1.raw	F1		23	1	13	13	0.00104232	451062912	22.19
		FALSE	High	Sequest HT (A3)	Unambiguous	[K].DEANRPDTTEAGLAKLRPAFR.[K]		1	RecPY14His	RecPY14His	1	5	1	0	1	1	466.445	2328.19	2328.21	-5.09	-0.00237	HCD (High Energy Collision Dissociation)	MS2	10.8523	11.464	22.1578	5371	PY14_257_109481_P14_A725_20201216_1.raw	F1	3.04		1				416731872	22.18
		FALSE	High	Mascot (A5)	Unambiguous	[K].DEANRPDTTEAGLAKLRPAFR.[K]		1	RecPY14His	RecPY14His	1	3	1	0	1	1	776.737	2328.2	2328.21	-3.33	-0.00258	HCD (High Energy Collision Dissociation)	MS2	0	103.757	22.1756	5381	PY14_257_109481_P14_A725_20201216_1.raw	F1		35	1	13	13	5.74116e-05	51546448	22.19
		FALSE	High	Mascot (A5)	Unambiguous	[K].DEANRPDTTEAGLAKLRPAFR.[K]		1	RecPY14His	RecPY14His	1	5	1	0	1	1	466.445	2328.19	2328.21	-5.09	-0.00237	HCD (High Energy Collision Dissociation)	MS2	10.8523	11.464	22.1578	5371	PY14_257_109481_P14_A725_20201216_1.raw	F1		31	1	13	13	0.000161065	416731872	22.18
		FALSE	High	Mascot (A5)	Unambiguous	[K].DEANRPDTTEAGLAKLRPAFR.[K]		1	RecPY14His	RecPY14His	1	5	1	0	1	1	466.446	2328.2	2328.21	-2.59	-0.00121	HCD (High Energy Collision Dissociation)	MS2	34.3211	8.527	20.531	5641	PY14_273_109186_PY14-20_A725-20200724_3.raw	F2		23	1	13	13	0.00108643	720375936	20.64
		FALSE	High	Sequest HT (A3)	Selected	[K].DEANRPDTTEAGLAKLRPAFR.[K]		1	RecPY14His	RecPY14His	1	5	1	0	1	1	466.446	2328.2	2328.21	-1.68	-0.00078	HCD (High Energy Collision Dissociation)	MS2	40.5758	112.63	21.1084	5895	PY14_273_109186_PY14-20_A725-20200724_3.raw	F2	2.62		1				720375936	20.64
	FALSE	High	[R].DELGIAPER.[F]		1	1	626	RecPY14His	RecPY14His [329-337]		0	999.511	High	High	High	High	2.88	62
		Checked	Confidence	Identifying Node	PSM Ambiguity	Annotated Sequence	Modifications	# Proteins	Master Protein Accessions	Protein Accessions	# Missed Cleavages	Charge	DeltaScore	DeltaCn	Rank	Search Engine Rank	m/z [Da]	MH+ [Da]	Theo. MH+ [Da]	DeltaM [ppm]	Deltam/z [Da]	Activation Type	MS Order	Isolation Interference [%]	Ion Inject Time [ms]	RT [min]	First Scan	Spectrum File	File ID	XCorr	Ions Score	# Protein Groups	Identity Strict	Identity Relaxed	Expectation Value	Precursor Abundance	Apex RT [min]
		FALSE	High	Sequest HT (A3)	Unambiguous	[R].DELGIAPER.[F]		1	RecPY14His	RecPY14His	0	2	1	0	1	1	500.259	999.511	999.511	0.24	0.00012	HCD (High Energy Collision Dissociation)	MS2	1.2209	200	56.0357	17147	PY14_257_109481_P14_A725_20201216_1.raw	F1	2.39		1				8068414	56.02
		FALSE	Medium	Sequest HT (A3)	Unambiguous	[R].DELGIAPER.[F]		1	RecPY14His	RecPY14His	0	2	1	0	1	1	500.259	999.511	999.511	0.3	0.00015	HCD (High Energy Collision Dissociation)	MS2	50.3414	200	47.1725	14564	PY14_273_109186_PY14-20_A725-20200724_3.raw	F2	1.68		1
		FALSE	High	Mascot (A5)	Unambiguous	[R].DELGIAPER.[F]		1	RecPY14His	RecPY14His	0	2	1	0	1	1	500.259	999.511	999.511	0.3	0.00015	HCD (High Energy Collision Dissociation)	MS2	50.3414	200	47.1725	14564	PY14_273_109186_PY14-20_A725-20200724_3.raw	F2		35	1	13	13	6.85488e-05	31657472	46.96
		FALSE	High	Sequest HT (A3)	Unambiguous	[R].DELGIAPER.[F]		1	RecPY14His	RecPY14His	0	2	1	0	1	1	500.259	999.51	999.511	-0.49	-0.00025	HCD (High Energy Collision Dissociation)	MS2	28.7586	77.219	30.7888	9745	PY14_273_109186_PY14-20_A725-20200724_3.raw	F2	2.01		1
		FALSE	High	Mascot (A5)	Unambiguous	[R].DELGIAPER.[F]		1	RecPY14His	RecPY14His	0	2	1	0	1	1	500.259	999.51	999.511	-0.62	-0.00031	HCD (High Energy Collision Dissociation)	MS2	22.1715	46.983	30.2449	8993	PY14_257_109481_P14_A725_20201216_1.raw	F1		35	1	13	13	5.86138e-05	231385456	30.04
		FALSE	High	Mascot (A5)	Unambiguous	[R].DELGIAPER.[F]		1	RecPY14His	RecPY14His	0	2	1	0	1	1	500.259	999.51	999.511	-0.49	-0.00025	HCD (High Energy Collision Dissociation)	MS2	28.7586	77.219	30.7888	9745	PY14_273_109186_PY14-20_A725-20200724_3.raw	F2		34	1	13	13	7.51623e-05
		FALSE	High	Mascot (A5)	Unambiguous	[R].DELGIAPER.[F]		1	RecPY14His	RecPY14His	0	2	1	0	1	1	500.259	999.511	999.511	0.3	0.00015	HCD (High Energy Collision Dissociation)	MS2	10.1766	153.984	38.9669	12395	PY14_273_109186_PY14-20_A725-20200724_3.raw	F2		43	1	13	13	1.08893e-05	51785052	38.49
		FALSE	High	Mascot (A5)	Unambiguous	[R].DELGIAPER.[F]		1	RecPY14His	RecPY14His	0	2	1	0	1	1	500.259	999.511	999.511	0.3	0.00015	HCD (High Energy Collision Dissociation)	MS2	0	200	59.4547	17393	PY14_273_109186_PY14-20_A725-20200724_3.raw	F2		33	1	13	13	9.7499e-05	171241	59.41
		FALSE	High	Mascot (A5)	Unambiguous	[R].DELGIAPER.[F]		1	RecPY14His	RecPY14His	0	2	1	0	1	1	500.259	999.51	999.511	-0.74	-0.00037	HCD (High Energy Collision Dissociation)	MS2	0.160448	0.03	21.4282	5080	PY14_257_109481_P14_A725_20201216_1.raw	F1		41	1	13	13	1.44544e-05	488286715904	21.57
		FALSE	Medium	Sequest HT (A3)	Unambiguous	[R].DELGIAPER.[F]		1	RecPY14His	RecPY14His	0	2	1	0	1	1	500.259	999.511	999.511	0.18	9e-05	HCD (High Energy Collision Dissociation)	MS2	43.6512	138.508	47.9507	14766	PY14_273_109186_PY14-20_A725-20200724_3.raw	F2	1.62		1
		FALSE	High	Mascot (A5)	Unambiguous	[R].DELGIAPER.[F]		1	RecPY14His	RecPY14His	0	2	1	0	1	1	500.259	999.51	999.511	-0.8	-0.0004	HCD (High Energy Collision Dissociation)	MS2	29.7533	112.544	24.4935	7270	PY14_273_109186_PY14-20_A725-20200724_3.raw	F2		25	1	13	13	0.000677642	4809799680	22.54
		FALSE	High	Sequest HT (A3)	Unambiguous	[R].DELGIAPER.[F]		1	RecPY14His	RecPY14His	0	2	1	0	1	1	500.258	999.509	999.511	-1.53	-0.00077	HCD (High Energy Collision Dissociation)	MS2	38.0646	61.109	29.6121	9334	PY14_273_109186_PY14-20_A725-20200724_3.raw	F2	2.31		1				81425760	29.28
		FALSE	Medium	Sequest HT (A3)	Unambiguous	[R].DELGIAPER.[F]		1	RecPY14His	RecPY14His	0	2	1	0	1	1	500.259	999.511	999.511	0.42	0.00021	HCD (High Energy Collision Dissociation)	MS2	5.88135	200	67.1634	18937	PY14_273_109186_PY14-20_A725-20200724_3.raw	F2	1.17		1
		FALSE	High	Sequest HT (A3)	Unambiguous	[R].DELGIAPER.[F]		1	RecPY14His	RecPY14His	0	2	1	0	1	1	500.259	999.511	999.511	0.12	6e-05	HCD (High Energy Collision Dissociation)	MS2	30.0804	35.782	28.3585	8881	PY14_273_109186_PY14-20_A725-20200724_3.raw	F2	1.92		1				366863616	27.34
		FALSE	High	Mascot (A5)	Unambiguous	[R].DELGIAPER.[F]		1	RecPY14His	RecPY14His	0	2	1	0	1	1	500.258	999.509	999.511	-1.1	-0.00055	HCD (High Energy Collision Dissociation)	MS2	12.993	200	34.2118	10913	PY14_273_109186_PY14-20_A725-20200724_3.raw	F2		41	1	13	13	1.44877e-05
		FALSE	High	Sequest HT (A3)	Unambiguous	[R].DELGIAPER.[F]		1	RecPY14His	RecPY14His	0	2	1	0	1	1	500.259	999.51	999.511	-0.07	-3e-05	HCD (High Energy Collision Dissociation)	MS2	1.20505	200	52.4512	15814	PY14_273_109186_PY14-20_A725-20200724_3.raw	F2	2.04		1				22788818	51.97
		FALSE	High	Mascot (A5)	Unambiguous	[R].DELGIAPER.[F]		1	RecPY14His	RecPY14His	0	2	1	0	1	1	500.259	999.511	999.511	0.3	0.00015	HCD (High Energy Collision Dissociation)	MS2	9.88135	149.139	39.832	12626	PY14_273_109186_PY14-20_A725-20200724_3.raw	F2		38	1	13	13	2.95121e-05	65286876	39.83
		FALSE	High	Mascot (A5)	Unambiguous	[R].DELGIAPER.[F]		1	RecPY14His	RecPY14His	0	2	1	0	1	1	500.259	999.511	999.511	0.3	0.00015	HCD (High Energy Collision Dissociation)	MS2	5.11928	200	69.4585	19969	PY14_257_109481_P14_A725_20201216_1.raw	F1		44	1	13	13	7.55092e-06	231726	69.51
		FALSE	High	Sequest HT (A3)	Unambiguous	[R].DELGIAPER.[F]		1	RecPY14His	RecPY14His	0	2	1	0	1	1	500.259	999.511	999.511	0.18	9e-05	HCD (High Energy Collision Dissociation)	MS2	0.975815	59.253	53.9438	16679	PY14_257_109481_P14_A725_20201216_1.raw	F1	2.6		1				290801728	53.78
		FALSE	High	Mascot (A5)	Unambiguous	[R].DELGIAPER.[F]		1	RecPY14His	RecPY14His	0	2	1	0	1	1	500.259	999.511	999.511	0.3	0.00015	HCD (High Energy Collision Dissociation)	MS2	2.50086	200	66.379	19344	PY14_257_109481_P14_A725_20201216_1.raw	F1		40	1	13	13	2.05116e-05	380101	66.28
		FALSE	Medium	Sequest HT (A3)	Unambiguous	[R].DELGIAPER.[F]		1	RecPY14His	RecPY14His	0	2	1	0	1	1	500.259	999.51	999.511	-0.13	-6e-05	HCD (High Energy Collision Dissociation)	MS2	6.31177	200	68.1899	19137	PY14_273_109186_PY14-20_A725-20200724_3.raw	F2	0.92		1
		FALSE	Medium	Sequest HT (A3)	Unambiguous	[R].DELGIAPER.[F]		1	RecPY14His	RecPY14His	0	2	1	0	1	1	500.259	999.511	999.511	0.3	0.00015	HCD (High Energy Collision Dissociation)	MS2	0	200	66.9055	18888	PY14_273_109186_PY14-20_A725-20200724_3.raw	F2	1.54		1
		FALSE	High	Sequest HT (A3)	Unambiguous	[R].DELGIAPER.[F]		1	RecPY14His	RecPY14His	0	2	1	0	1	1	500.259	999.51	999.511	-0.19	-9e-05	HCD (High Energy Collision Dissociation)	MS2	20.1236	57.398	29.8844	9429	PY14_273_109186_PY14-20_A725-20200724_3.raw	F2	2.02		1
		FALSE	High	Mascot (A5)	Unambiguous	[R].DELGIAPER.[F]		1	RecPY14His	RecPY14His	0	2	1	0	1	1	500.259	999.51	999.511	-0.68	-0.00034	HCD (High Energy Collision Dissociation)	MS2	31.0533	38.264	26.0435	7960	PY14_273_109186_PY14-20_A725-20200724_3.raw	F2		40	1	13	13	2.00447e-05	269183680	26.53
		FALSE	High	Sequest HT (A3)	Unambiguous	[R].DELGIAPER.[F]		1	RecPY14His	RecPY14His	0	2	1	0	1	1	500.259	999.51	999.511	-0.8	-0.0004	HCD (High Energy Collision Dissociation)	MS2	16.1331	44.943	34.0188	10529	PY14_257_109481_P14_A725_20201216_1.raw	F1	2.7		1				219892672	33.98
		FALSE	High	Sequest HT (A3)	Unambiguous	[R].DELGIAPER.[F]		1	RecPY14His	RecPY14His	0	2	1	0	1	1	500.259	999.511	999.511	0.73	0.00036	HCD (High Energy Collision Dissociation)	MS2	25.4292	200	47.6854	14697	PY14_273_109186_PY14-20_A725-20200724_3.raw	F2	2.2		1				16539502	47.82
		FALSE	High	Sequest HT (A3)	Unambiguous	[R].DELGIAPER.[F]		1	RecPY14His	RecPY14His	0	2	1	0	1	1	500.259	999.51	999.511	-0.49	-0.00025	HCD (High Energy Collision Dissociation)	MS2	8.84467	102.548	30.1754	9530	PY14_273_109186_PY14-20_A725-20200724_3.raw	F2	2.35		1
		FALSE	High	Mascot (A5)	Unambiguous	[R].DELGIAPER.[F]		1	RecPY14His	RecPY14His	0	2	1	0	1	1	500.258	999.509	999.511	-1.1	-0.00055	HCD (High Energy Collision Dissociation)	MS2	49.9802	42.31	46.0449	14710	PY14_257_109481_P14_A725_20201216_1.raw	F1		30	1	13	13	0.000184927	74497296	46.33
		FALSE	High	Mascot (A5)	Unambiguous	[R].DELGIAPER.[F]		1	RecPY14His	RecPY14His	0	2	1	0	1	1	500.259	999.51	999.511	-0.68	-0.00034	HCD (High Energy Collision Dissociation)	MS2	11.9716	48.135	34.6183	10766	PY14_257_109481_P14_A725_20201216_1.raw	F1		37	1	13	13	4.1783e-05	126712584	34.61
		FALSE	High	Mascot (A5)	Unambiguous	[R].DELGIAPER.[F]		1	RecPY14His	RecPY14His	0	2	1	0	1	1	500.259	999.51	999.511	-0.68	-0.00034	HCD (High Energy Collision Dissociation)	MS2	41.5247	43.758	46.5797	14860	PY14_257_109481_P14_A725_20201216_1.raw	F1		41	1	13	13	1.55597e-05	69870792	46.65
		FALSE	High	Sequest HT (A3)	Unambiguous	[R].DELGIAPER.[F]		1	RecPY14His	RecPY14His	0	2	1	0	1	1	500.259	999.511	999.511	0.3	0.00015	HCD (High Energy Collision Dissociation)	MS2	1.02175	200	56.5523	17264	PY14_257_109481_P14_A725_20201216_1.raw	F1	2.27		1				8068414	56.02
		FALSE	High	Mascot (A5)	Unambiguous	[R].DELGIAPER.[F]		1	RecPY14His	RecPY14His	0	2	1	0	1	1	500.259	999.511	999.511	0.3	0.00015	HCD (High Energy Collision Dissociation)	MS2	21.681	170.241	41.5254	13084	PY14_273_109186_PY14-20_A725-20200724_3.raw	F2		36	1	13	13	4.90908e-05	115922720	40.67
		FALSE	Medium	Sequest HT (A3)	Unambiguous	[R].DELGIAPER.[F]		1	RecPY14His	RecPY14His	0	2	1	0	1	1	500.259	999.511	999.511	0.73	0.00036	HCD (High Energy Collision Dissociation)	MS2	30.17	200	47.4279	14631	PY14_273_109186_PY14-20_A725-20200724_3.raw	F2	1.16		1
		FALSE	High	Sequest HT (A3)	Unambiguous	[R].DELGIAPER.[F]		1	RecPY14His	RecPY14His	0	2	1	0	1	1	500.259	999.511	999.511	0.73	0.00036	HCD (High Energy Collision Dissociation)	MS2	0	79.056	34.3218	10649	PY14_257_109481_P14_A725_20201216_1.raw	F1	2.68		1				219892672	33.98
		FALSE	High	Mascot (A5)	Unambiguous	[R].DELGIAPER.[F]		1	RecPY14His	RecPY14His	0	2	1	0	1	1	500.259	999.51	999.511	-0.62	-0.00031	HCD (High Energy Collision Dissociation)	MS2	0	158.462	32.3862	10280	PY14_273_109186_PY14-20_A725-20200724_3.raw	F2		40	1	13	13	1.97242e-05
		FALSE	High	Mascot (A5)	Unambiguous	[R].DELGIAPER.[F]		1	RecPY14His	RecPY14His	0	2	1	0	1	1	500.259	999.51	999.511	-0.62	-0.00031	HCD (High Energy Collision Dissociation)	MS2	51.2489	83.292	46.8658	14944	PY14_257_109481_P14_A725_20201216_1.raw	F1		41	1	13	13	1.45881e-05	69870792	46.65
		FALSE	High	Sequest HT (A3)	Unambiguous	[R].DELGIAPER.[F]		1	RecPY14His	RecPY14His	0	2	1	0	1	1	500.26	999.512	999.511	1.46	0.00073	HCD (High Energy Collision Dissociation)	MS2	51.4005	55.533	44.3785	14216	PY14_257_109481_P14_A725_20201216_1.raw	F1	2.06		1				36843932	44.3
		FALSE	Medium	Sequest HT (A3)	Unambiguous	[R].DELGIAPER.[F]		1	RecPY14His	RecPY14His	0	2	1	0	1	1	500.259	999.51	999.511	-0.13	-6e-05	HCD (High Energy Collision Dissociation)	MS2	2.94274	200	67.4198	18988	PY14_273_109186_PY14-20_A725-20200724_3.raw	F2	1.08		1
		FALSE	High	Sequest HT (A3)	Unambiguous	[R].DELGIAPER.[F]		1	RecPY14His	RecPY14His	0	2	1	0	1	1	500.258	999.51	999.511	-0.86	-0.00043	HCD (High Energy Collision Dissociation)	MS2	5.03464	58.656	32.8786	10069	PY14_257_109481_P14_A725_20201216_1.raw	F1	2.85		1				214883248	32.64
		FALSE	High	Sequest HT (A3)	Unambiguous	[R].DELGIAPER.[F]		1	RecPY14His	RecPY14His	0	2	1	0	1	1	500.259	999.511	999.511	0.24	0.00012	HCD (High Energy Collision Dissociation)	MS2	0.737738	200	57.0733	17382	PY14_257_109481_P14_A725_20201216_1.raw	F1	2.37		1				5.70649e+06	56.98
		FALSE	High	Mascot (A5)	Unambiguous	[R].DELGIAPER.[F]		1	RecPY14His	RecPY14His	0	2	1	0	1	1	500.259	999.511	999.511	0.3	0.00015	HCD (High Energy Collision Dissociation)	MS2	0	200	67.9314	19087	PY14_273_109186_PY14-20_A725-20200724_3.raw	F2		42	1	13	13	1.38357e-05	179179	67.71
		FALSE	High	Mascot (A5)	Unambiguous	[R].DELGIAPER.[F]		1	RecPY14His	RecPY14His	0	2	1	0	1	1	500.259	999.51	999.511	-0.49	-0.00025	HCD (High Energy Collision Dissociation)	MS2	8.84467	102.548	30.1754	9530	PY14_273_109186_PY14-20_A725-20200724_3.raw	F2		40	1	13	13	2.01837e-05
		FALSE	High	Mascot (A5)	Unambiguous	[R].DELGIAPER.[F]		1	RecPY14His	RecPY14His	0	2	1	0	1	1	500.259	999.511	999.511	0.24	0.00012	HCD (High Energy Collision Dissociation)	MS2	0	200	60.9456	18222	PY14_257_109481_P14_A725_20201216_1.raw	F1		43	1	13	13	1.10662e-05	448542	60.93
		FALSE	High	Sequest HT (A3)	Unambiguous	[R].DELGIAPER.[F]		1	RecPY14His	RecPY14His	0	2	1	0	1	1	500.259	999.51	999.511	-0.25	-0.00012	HCD (High Energy Collision Dissociation)	MS2	11.7497	200	32.1108	10184	PY14_273_109186_PY14-20_A725-20200724_3.raw	F2	2.35		1				108958312	31.43
		FALSE	High	Sequest HT (A3)	Unambiguous	[R].DELGIAPER.[F]		1	RecPY14His	RecPY14His	0	2	1	0	1	1	500.259	999.511	999.511	0.54	0.00027	HCD (High Energy Collision Dissociation)	MS2	20.0975	200	45.8701	14225	PY14_273_109186_PY14-20_A725-20200724_3.raw	F2	2.2		1				20022784	46.12
		FALSE	High	Mascot (A5)	Unambiguous	[R].DELGIAPER.[F]		1	RecPY14His	RecPY14His	0	2	1	0	1	1	500.259	999.511	999.511	0.24	0.00012	HCD (High Energy Collision Dissociation)	MS2	0	200	66.891	19448	PY14_257_109481_P14_A725_20201216_1.raw	F1		40	1	13	13	2.12814e-05	185724	67.34
		FALSE	High	Mascot (A5)	Unambiguous	[R].DELGIAPER.[F]		1	RecPY14His	RecPY14His	0	2	1	0	1	1	500.259	999.511	999.511	0.24	0.00012	HCD (High Energy Collision Dissociation)	MS2	1.3775	200	66.6346	19396	PY14_257_109481_P14_A725_20201216_1.raw	F1		42	1	13	13	1.25893e-05	656808	66.59
		FALSE	High	Mascot (A5)	Unambiguous	[R].DELGIAPER.[F]		1	RecPY14His	RecPY14His	0	2	1	0	1	1	500.259	999.51	999.511	-0.25	-0.00012	HCD (High Energy Collision Dissociation)	MS2	25.4998	39.882	35.5781	11129	PY14_257_109481_P14_A725_20201216_1.raw	F1		40	1	13	13	1.98153e-05	186843280	35.69
		FALSE	High	Mascot (A5)	Unambiguous	[R].DELGIAPER.[F]		1	RecPY14His	RecPY14His	0	2	1	0	1	1	500.259	999.51	999.511	-0.25	-0.00012	HCD (High Energy Collision Dissociation)	MS2	0	165.541	38.2184	12219	PY14_257_109481_P14_A725_20201216_1.raw	F1		37	1	13	13	4.27563e-05	68533824	38.37
		FALSE	High	Mascot (A5)	Unambiguous	[R].DELGIAPER.[F]		1	RecPY14His	RecPY14His	0	2	1	0	1	1	500.259	999.511	999.511	0.24	0.00012	HCD (High Energy Collision Dissociation)	MS2	2.25721	200	62.7704	18602	PY14_257_109481_P14_A725_20201216_1.raw	F1		43	1	13	13	1.11173e-05	191244	62.67
		FALSE	High	Sequest HT (A3)	Unambiguous	[R].DELGIAPER.[F]		1	RecPY14His	RecPY14His	0	2	1	0	1	1	500.259	999.51	999.511	-0.62	-0.00031	HCD (High Energy Collision Dissociation)	MS2	0	158.462	32.3862	10280	PY14_273_109186_PY14-20_A725-20200724_3.raw	F2	2.36		1
		FALSE	High	Mascot (A5)	Unambiguous	[R].DELGIAPER.[F]		1	RecPY14His	RecPY14His	0	2	1	0	1	1	500.259	999.511	999.511	0.24	0.00012	HCD (High Energy Collision Dissociation)	MS2	1.04938	200	63.8045	18816	PY14_257_109481_P14_A725_20201216_1.raw	F1		42	1	13	13	1.1272e-05	196982	63.55
		FALSE	High	Sequest HT (A3)	Unambiguous	[R].DELGIAPER.[F]		1	RecPY14His	RecPY14His	0	2	1	0	1	1	500.259	999.511	999.511	0.48	0.00024	HCD (High Energy Collision Dissociation)	MS2	47.4642	200	45.5933	14154	PY14_273_109186_PY14-20_A725-20200724_3.raw	F2	2.07		1				28592424	45.22
		FALSE	High	Mascot (A5)	Unambiguous	[R].DELGIAPER.[F]		1	RecPY14His	RecPY14His	0	2	1	0	1	1	500.259	999.511	999.511	0.24	0.00012	HCD (High Energy Collision Dissociation)	MS2	7.62109	95.578	31.6937	10046	PY14_273_109186_PY14-20_A725-20200724_3.raw	F2		38	1	13	13	3.1842e-05	108958312	31.43
		FALSE	High	Mascot (A5)	Unambiguous	[R].DELGIAPER.[F]		1	RecPY14His	RecPY14His	0	2	1	0	1	1	500.259	999.51	999.511	-0.25	-0.00012	HCD (High Energy Collision Dissociation)	MS2	23.0641	107.2	26.3615	8093	PY14_273_109186_PY14-20_A725-20200724_3.raw	F2		35	1	13	13	6.85488e-05	269183680	26.53
		FALSE	High	Mascot (A5)	Unambiguous	[R].DELGIAPER.[F]		1	RecPY14His	RecPY14His	0	2	1	0	1	1	500.259	999.51	999.511	-0.49	-0.00025	HCD (High Energy Collision Dissociation)	MS2	42.8388	15.478	18.4278	4794	PY14_273_109186_PY14-20_A725-20200724_3.raw	F2		39	1	13	13	2.77971e-05	380120563712	18.77
		FALSE	High	Sequest HT (A3)	Unambiguous	[R].DELGIAPER.[F]		1	RecPY14His	RecPY14His	0	2	1	0	1	1	500.259	999.51	999.511	-0.13	-6e-05	HCD (High Energy Collision Dissociation)	MS2	17.395	185.519	51.9288	15680	PY14_273_109186_PY14-20_A725-20200724_3.raw	F2	2.01		1				22788818	51.97
		FALSE	High	Mascot (A5)	Unambiguous	[R].DELGIAPER.[F]		1	RecPY14His	RecPY14His	0	2	1	0	1	1	500.259	999.51	999.511	-0.8	-0.0004	HCD (High Energy Collision Dissociation)	MS2	16.1331	44.943	34.0188	10529	PY14_257_109481_P14_A725_20201216_1.raw	F1		41	1	13	13	1.63682e-05	219892672	33.98
		FALSE	High	Mascot (A5)	Unambiguous	[R].DELGIAPER.[F]		1	RecPY14His	RecPY14His	0	2	1	0	1	1	500.259	999.51	999.511	-0.8	-0.0004	HCD (High Energy Collision Dissociation)	MS2	19.2366	102.135	28.0926	8770	PY14_273_109186_PY14-20_A725-20200724_3.raw	F2		34	1	13	13	8.70964e-05	366863616	27.34
		FALSE	High	Sequest HT (A3)	Unambiguous	[R].DELGIAPER.[F]		1	RecPY14His	RecPY14His	0	2	1	0	1	1	500.259	999.511	999.511	0.24	0.00012	HCD (High Energy Collision Dissociation)	MS2	6.67431	200	52.1901	15750	PY14_273_109186_PY14-20_A725-20200724_3.raw	F2	1.92		1				22788818	51.97
		FALSE	High	Mascot (A5)	Unambiguous	[R].DELGIAPER.[F]		1	RecPY14His	RecPY14His	0	2	1	0	1	1	500.258	999.509	999.511	-1.1	-0.00055	HCD (High Energy Collision Dissociation)	MS2	24.8935	32.773	29.7023	8755	PY14_257_109481_P14_A725_20201216_1.raw	F1		36	1	13	13	5.5847e-05	96083304	29.71
		FALSE	High	Sequest HT (A3)	Unambiguous	[R].DELGIAPER.[F]		1	RecPY14His	RecPY14His	0	2	1	0	1	1	500.259	999.511	999.511	0.3	0.00015	HCD (High Energy Collision Dissociation)	MS2	9.88135	149.139	39.832	12626	PY14_273_109186_PY14-20_A725-20200724_3.raw	F2	2.03		1				65286876	39.83
		FALSE	High	Sequest HT (A3)	Unambiguous	[R].DELGIAPER.[F]		1	RecPY14His	RecPY14His	0	2	1	0	1	1	500.258	999.508	999.511	-2.14	-0.00107	HCD (High Energy Collision Dissociation)	MS2	0	66.348	33.1593	10190	PY14_257_109481_P14_A725_20201216_1.raw	F1	2.53		1				175733088	33.24
		FALSE	High	Mascot (A5)	Unambiguous	[R].DELGIAPER.[F]		1	RecPY14His	RecPY14His	0	2	1	0	1	1	500.259	999.511	999.511	0.3	0.00015	HCD (High Energy Collision Dissociation)	MS2	0	200	66.9055	18888	PY14_273_109186_PY14-20_A725-20200724_3.raw	F2		46	1	13	13	4.97737e-06
		FALSE	High	Sequest HT (A3)	Unambiguous	[R].DELGIAPER.[F]		1	RecPY14His	RecPY14His	0	2	1	0	1	1	500.259	999.51	999.511	-0.43	-0.00022	HCD (High Energy Collision Dissociation)	MS2	27.2089	73.833	28.9211	9085	PY14_273_109186_PY14-20_A725-20200724_3.raw	F2	2.38		1				81425760	29.28
		FALSE	High	Mascot (A5)	Unambiguous	[R].DELGIAPER.[F]		1	RecPY14His	RecPY14His	0	2	1	0	1	1	500.258	999.51	999.511	-0.98	-0.00049	HCD (High Energy Collision Dissociation)	MS2	32.4425	141.624	55.517	17036	PY14_257_109481_P14_A725_20201216_1.raw	F1		40	1	13	13	1.94536e-05	15103224	55.02
		FALSE	High	Sequest HT (A3)	Unambiguous	[R].DELGIAPER.[F]		1	RecPY14His	RecPY14His	0	2	1	0	1	1	500.259	999.511	999.511	0.48	0.00024	HCD (High Energy Collision Dissociation)	MS2	21.9416	64.712	28.6269	8979	PY14_273_109186_PY14-20_A725-20200724_3.raw	F2	2.39		1
		FALSE	High	Mascot (A5)	Unambiguous	[R].DELGIAPER.[F]		1	RecPY14His	RecPY14His	0	2	1	0	1	1	500.258	999.51	999.511	-0.92	-0.00046	HCD (High Energy Collision Dissociation)	MS2	14.1996	19.752	28.8858	8408	PY14_257_109481_P14_A725_20201216_1.raw	F1		41	1	13	13	1.6788e-05	430810144	29
		FALSE	High	Sequest HT (A3)	Unambiguous	[R].DELGIAPER.[F]		1	RecPY14His	RecPY14His	0	2	1	0	1	1	500.258	999.51	999.511	-0.86	-0.00043	HCD (High Energy Collision Dissociation)	MS2	7.45421	31.68	33.4507	10302	PY14_257_109481_P14_A725_20201216_1.raw	F1	2.54		1				175733088	33.24
		FALSE	High	Mascot (A5)	Unambiguous	[R].DELGIAPER.[F]		1	RecPY14His	RecPY14His	0	2	1	0	1	1	500.258	999.51	999.511	-0.86	-0.00043	HCD (High Energy Collision Dissociation)	MS2	29.9253	66.574	31.0672	9841	PY14_273_109186_PY14-20_A725-20200724_3.raw	F2		39	1	13	13	2.32274e-05	108958312	31.43
		FALSE	High	Mascot (A5)	Unambiguous	[R].DELGIAPER.[F]		1	RecPY14His	RecPY14His	0	2	1	0	1	1	500.258	999.51	999.511	-0.86	-0.00043	HCD (High Energy Collision Dissociation)	MS2	7.45421	31.68	33.4507	10302	PY14_257_109481_P14_A725_20201216_1.raw	F1		41	1	13	13	1.69824e-05	175733088	33.24
		FALSE	High	Sequest HT (A3)	Unambiguous	[R].DELGIAPER.[F]		1	RecPY14His	RecPY14His	0	2	1	0	1	1	500.258	999.509	999.511	-1.9	-0.00095	HCD (High Energy Collision Dissociation)	MS2	8.58573	134.251	33.7222	10410	PY14_257_109481_P14_A725_20201216_1.raw	F1	2.51		1				219892672	33.98
		FALSE	High	Mascot (A5)	Unambiguous	[R].DELGIAPER.[F]		1	RecPY14His	RecPY14His	0	2	1	0	1	1	500.258	999.51	999.511	-0.86	-0.00043	HCD (High Energy Collision Dissociation)	MS2	5.03464	58.656	32.8786	10069	PY14_257_109481_P14_A725_20201216_1.raw	F1		39	1	13	13	2.43781e-05	214883248	32.64
		FALSE	High	Mascot (A5)	Unambiguous	[R].DELGIAPER.[F]		1	RecPY14His	RecPY14His	0	2	1	0	1	1	500.259	999.51	999.511	-0.8	-0.0004	HCD (High Energy Collision Dissociation)	MS2	13.9857	45.364	25.7726	7847	PY14_273_109186_PY14-20_A725-20200724_3.raw	F2		36	1	13	13	5.49541e-05	197063696	25.84
		FALSE	High	Mascot (A5)	Unambiguous	[R].DELGIAPER.[F]		1	RecPY14His	RecPY14His	0	2	1	0	1	1	500.259	999.51	999.511	-0.8	-0.0004	HCD (High Energy Collision Dissociation)	MS2	4.2668	4.759	24.5246	6419	PY14_257_109481_P14_A725_20201216_1.raw	F1		41	1	13	13	1.61808e-05	4709830144	24.43
		FALSE	High	Sequest HT (A3)	Unambiguous	[R].DELGIAPER.[F]		1	RecPY14His	RecPY14His	0	2	1	0	1	1	500.259	999.511	999.511	0.18	9e-05	HCD (High Energy Collision Dissociation)	MS2	0.863943	200	56.8139	17323	PY14_257_109481_P14_A725_20201216_1.raw	F1	2.58		1				3110628	56.77
		FALSE	High	Mascot (A5)	Unambiguous	[R].DELGIAPER.[F]		1	RecPY14His	RecPY14His	0	2	1	0	1	1	500.26	999.512	999.511	1.58	0.00079	HCD (High Energy Collision Dissociation)	MS2	6.54511	13.535	22.8557	6602	PY14_273_109186_PY14-20_A725-20200724_3.raw	F2		42	1	13	13	1.1298e-05	4809799680	22.54
		FALSE	High	Sequest HT (A3)	Unambiguous	[R].DELGIAPER.[F]		1	RecPY14His	RecPY14His	0	2	1	0	1	1	500.259	999.51	999.511	-0.74	-0.00037	HCD (High Energy Collision Dissociation)	MS2	0.160448	0.03	21.4282	5080	PY14_257_109481_P14_A725_20201216_1.raw	F1	2.73		1				488286715904	21.57
		FALSE	High	Mascot (A5)	Unambiguous	[R].DELGIAPER.[F]		1	RecPY14His	RecPY14His	0	2	1	0	1	1	500.26	999.512	999.511	1.34	0.00067	HCD (High Energy Collision Dissociation)	MS2	8.97682	20.574	28.6222	8288	PY14_257_109481_P14_A725_20201216_1.raw	F1		39	1	13	13	2.58821e-05	430810144	29
		FALSE	High	Mascot (A5)	Unambiguous	[R].DELGIAPER.[F]		1	RecPY14His	RecPY14His	0	2	1	0	1	1	500.26	999.513	999.511	2.13	0.00107	HCD (High Energy Collision Dissociation)	MS2	26.8676	36.657	42.3149	13567	PY14_257_109481_P14_A725_20201216_1.raw	F1		38	1	13	13	3.2434e-05	66754536	42.26
		FALSE	High	Mascot (A5)	Unambiguous	[R].DELGIAPER.[F]		1	RecPY14His	RecPY14His	0	2	1	0	1	1	500.259	999.512	999.511	1.03	0.00052	HCD (High Energy Collision Dissociation)	MS2	32.0762	36.959	27.1613	8417	PY14_273_109186_PY14-20_A725-20200724_3.raw	F2		42	1	13	13	1.40929e-05	366863616	27.34
		FALSE	High	Sequest HT (A3)	Unambiguous	[R].DELGIAPER.[F]		1	RecPY14His	RecPY14His	0	2	1	0	1	1	500.259	999.511	999.511	0.36	0.00018	HCD (High Energy Collision Dissociation)	MS2	0	200	63.2868	18710	PY14_257_109481_P14_A725_20201216_1.raw	F1	2.51		1				196982	63.55
		FALSE	High	Mascot (A5)	Unambiguous	[R].DELGIAPER.[F]		1	RecPY14His	RecPY14His	0	2	1	0	1	1	500.259	999.511	999.511	0.91	0.00046	HCD (High Energy Collision Dissociation)	MS2	30.0196	22.42	31.2078	9393	PY14_257_109481_P14_A725_20201216_1.raw	F1		37	1	13	13	4.4157e-05	374680000	31.13
		FALSE	High	Mascot (A5)	Unambiguous	[R].DELGIAPER.[F]		1	RecPY14His	RecPY14His	0	2	1	0	1	1	500.259	999.511	999.511	0.91	0.00046	HCD (High Energy Collision Dissociation)	MS2	0	130.199	34.8182	11105	PY14_273_109186_PY14-20_A725-20200724_3.raw	F2		40	1	13	13	1.87068e-05	73982104	35.27
		FALSE	High	Sequest HT (A3)	Unambiguous	[R].DELGIAPER.[F]		1	RecPY14His	RecPY14His	0	2	1	0	1	1	500.26	999.512	999.511	1.83	0.00091	HCD (High Energy Collision Dissociation)	MS2	40.5246	54.557	46.3247	14788	PY14_257_109481_P14_A725_20201216_1.raw	F1	2.24		1				74497296	46.33
		FALSE	High	Mascot (A5)	Unambiguous	[R].DELGIAPER.[F]		1	RecPY14His	RecPY14His	0	2	1	0	1	1	500.259	999.511	999.511	0.91	0.00046	HCD (High Energy Collision Dissociation)	MS2	9.7739	105.081	35.4471	11303	PY14_273_109186_PY14-20_A725-20200724_3.raw	F2		39	1	13	13	2.54683e-05	73982104	35.27
		FALSE	High	Mascot (A5)	Unambiguous	[R].DELGIAPER.[F]		1	RecPY14His	RecPY14His	0	2	1	0	1	1	500.259	999.511	999.511	0.91	0.00046	HCD (High Energy Collision Dissociation)	MS2	18.2616	200	44.7052	13921	PY14_273_109186_PY14-20_A725-20200724_3.raw	F2		39	1	13	13	2.50611e-05	81564488	43.27
		FALSE	High	Mascot (A5)	Unambiguous	[R].DELGIAPER.[F]		1	RecPY14His	RecPY14His	0	2	1	0	1	1	500.259	999.511	999.511	0.85	0.00042	HCD (High Energy Collision Dissociation)	MS2	33.2283	68.756	47.1231	15014	PY14_257_109481_P14_A725_20201216_1.raw	F1		33	1	13	13	9.46237e-05	43062820	47.21
		FALSE	High	Sequest HT (A3)	Unambiguous	[R].DELGIAPER.[F]		1	RecPY14His	RecPY14His	0	2	1	0	1	1	500.258	999.509	999.511	-2.02	-0.00101	HCD (High Energy Collision Dissociation)	MS2	34.8525	0.033	21.2997	5026	PY14_257_109481_P14_A725_20201216_1.raw	F1	2.4		1				488286715904	21.57
		FALSE	High	Sequest HT (A3)	Unambiguous	[R].DELGIAPER.[F]		1	RecPY14His	RecPY14His	0	2	1	0	1	1	500.259	999.51	999.511	-0.49	-0.00025	HCD (High Energy Collision Dissociation)	MS2	42.8388	15.478	18.4278	4794	PY14_273_109186_PY14-20_A725-20200724_3.raw	F2	2.36		1				380120563712	18.77
		FALSE	High	Mascot (A5)	Unambiguous	[R].DELGIAPER.[F]		1	RecPY14His	RecPY14His	0	2	1	0	1	1	500.259	999.511	999.511	0.85	0.00042	HCD (High Energy Collision Dissociation)	MS2	0	154.47	35.1521	11214	PY14_273_109186_PY14-20_A725-20200724_3.raw	F2		40	1	13	13	1.98609e-05	73982104	35.27
		FALSE	High	Mascot (A5)	Unambiguous	[R].DELGIAPER.[F]		1	RecPY14His	RecPY14His	0	2	1	0	1	1	500.259	999.511	999.511	0.85	0.00042	HCD (High Energy Collision Dissociation)	MS2	12.1654	192.106	42.4067	13315	PY14_273_109186_PY14-20_A725-20200724_3.raw	F2		37	1	13	13	3.86367e-05	33751296	42.32
		FALSE	High	Mascot (A5)	Unambiguous	[R].DELGIAPER.[F]		1	RecPY14His	RecPY14His	0	2	1	0	1	1	500.259	999.512	999.511	1.03	0.00052	HCD (High Energy Collision Dissociation)	MS2	26.4631	91.529	39.4338	12655	PY14_257_109481_P14_A725_20201216_1.raw	F1		40	1	13	13	2.06063e-05	89329840	39.82
		FALSE	High	Mascot (A5)	Unambiguous	[R].DELGIAPER.[F]		1	RecPY14His	RecPY14His	0	2	1	0	1	1	500.259	999.511	999.511	0.73	0.00036	HCD (High Energy Collision Dissociation)	MS2	0	79.056	34.3218	10649	PY14_257_109481_P14_A725_20201216_1.raw	F1		37	1	13	13	4.03645e-05	219892672	33.98
		FALSE	High	Mascot (A5)	Unambiguous	[R].DELGIAPER.[F]		1	RecPY14His	RecPY14His	0	2	1	0	1	1	500.26	999.513	999.511	2.13	0.00107	HCD (High Energy Collision Dissociation)	MS2	36.2488	58.946	43.8409	14041	PY14_257_109481_P14_A725_20201216_1.raw	F1		32	1	13	13	0.000121619	67038072	44.05
		FALSE	High	Mascot (A5)	Unambiguous	[R].DELGIAPER.[F]		1	RecPY14His	RecPY14His	0	2	1	0	1	1	500.26	999.513	999.511	2.13	0.00107	HCD (High Energy Collision Dissociation)	MS2	16.0098	85.076	39.9837	12838	PY14_257_109481_P14_A725_20201216_1.raw	F1		41	1	13	13	1.74582e-05	75457856	40.12
		FALSE	High	Sequest HT (A3)	Unambiguous	[R].DELGIAPER.[F]		1	RecPY14His	RecPY14His	0	2	1	0	1	1	500.259	999.511	999.511	0.24	0.00012	HCD (High Energy Collision Dissociation)	MS2	0	200	69.7158	20021	PY14_257_109481_P14_A725_20201216_1.raw	F1	2.42		1				90578	69.94
		FALSE	High	Sequest HT (A3)	Unambiguous	[R].DELGIAPER.[F]		1	RecPY14His	RecPY14His	0	2	1	0	1	1	500.259	999.511	999.511	0.24	0.00012	HCD (High Energy Collision Dissociation)	MS2	0	200	66.1232	19292	PY14_257_109481_P14_A725_20201216_1.raw	F1	2.43		1				198558	65.92
		FALSE	High	Sequest HT (A3)	Unambiguous	[R].DELGIAPER.[F]		1	RecPY14His	RecPY14His	0	2	1	0	1	1	500.259	999.511	999.511	0.24	0.00012	HCD (High Energy Collision Dissociation)	MS2	1.08221	200	69.1979	19915	PY14_257_109481_P14_A725_20201216_1.raw	F1	2.41		1				475364	69.19
		FALSE	High	Sequest HT (A3)	Unambiguous	[R].DELGIAPER.[F]		1	RecPY14His	RecPY14His	0	2	1	0	1	1	500.258	999.509	999.511	-1.84	-0.00092	HCD (High Energy Collision Dissociation)	MS2	0	4.712	24.2402	6299	PY14_257_109481_P14_A725_20201216_1.raw	F1	2.55		1				4709830144	24.43
		FALSE	High	Sequest HT (A3)	Unambiguous	[R].DELGIAPER.[F]		1	RecPY14His	RecPY14His	0	2	1	0	1	1	500.259	999.51	999.511	-0.07	-3e-05	HCD (High Energy Collision Dissociation)	MS2	0	200	67.6595	19605	PY14_257_109481_P14_A725_20201216_1.raw	F1	2.48		1				185724	67.34
		FALSE	High	Mascot (A5)	Unambiguous	[R].DELGIAPER.[F]		1	RecPY14His	RecPY14His	0	2	1	0	1	1	500.26	999.513	999.511	2.19	0.0011	HCD (High Energy Collision Dissociation)	MS2	38.8396	50.561	43.2286	13852	PY14_257_109481_P14_A725_20201216_1.raw	F1		38	1	13	13	3.00608e-05	53118608	42.96
		FALSE	High	Sequest HT (A3)	Unambiguous	[R].DELGIAPER.[F]		1	RecPY14His	RecPY14His	0	2	1	0	1	1	500.259	999.511	999.511	0.3	0.00015	HCD (High Energy Collision Dissociation)	MS2	5.11928	200	69.4585	19969	PY14_257_109481_P14_A725_20201216_1.raw	F1	2.06		1				231726	69.51
		FALSE	High	Sequest HT (A3)	Unambiguous	[R].DELGIAPER.[F]		1	RecPY14His	RecPY14His	0	2	1	0	1	1	500.259	999.511	999.511	0.24	0.00012	HCD (High Energy Collision Dissociation)	MS2	1.52787	200	69.976	20072	PY14_257_109481_P14_A725_20201216_1.raw	F1	2.4		1				90578	69.94
		FALSE	High	Sequest HT (A3)	Unambiguous	[R].DELGIAPER.[F]		1	RecPY14His	RecPY14His	0	2	1	0	1	1	500.257	999.508	999.511	-2.87	-0.00144	HCD (High Energy Collision Dissociation)	MS2	0	23.004	23.9724	6171	PY14_257_109481_P14_A725_20201216_1.raw	F1	2.69		1				4709830144	24.43
		FALSE	High	Mascot (A5)	Unambiguous	[R].DELGIAPER.[F]		1	RecPY14His	RecPY14His	0	2	1	0	1	1	500.259	999.511	999.511	0.73	0.00036	HCD (High Energy Collision Dissociation)	MS2	15.9703	200	42.7023	13392	PY14_273_109186_PY14-20_A725-20200724_3.raw	F2		42	1	13	13	1.30017e-05	21500962	42.87
		FALSE	High	Sequest HT (A3)	Unambiguous	[R].DELGIAPER.[F]		1	RecPY14His	RecPY14His	0	2	1	0	1	1	500.259	999.511	999.511	0.48	0.00024	HCD (High Energy Collision Dissociation)	MS2	1.56378	200	67.4051	19552	PY14_257_109481_P14_A725_20201216_1.raw	F1	2.55		1				185724	67.34
		FALSE	High	Sequest HT (A3)	Unambiguous	[R].DELGIAPER.[F]		1	RecPY14His	RecPY14His	0	2	1	0	1	1	500.259	999.51	999.511	-0.07	-3e-05	HCD (High Energy Collision Dissociation)	MS2	0	200	67.1449	19500	PY14_257_109481_P14_A725_20201216_1.raw	F1	2.41		1				209089	66.97
		FALSE	High	Sequest HT (A3)	Unambiguous	[R].DELGIAPER.[F]		1	RecPY14His	RecPY14His	0	2	1	0	1	1	500.258	999.509	999.511	-1.78	-0.00089	HCD (High Energy Collision Dissociation)	MS2	10.9712	6.635	23.6578	6048	PY14_257_109481_P14_A725_20201216_1.raw	F1	2.5		1				19473537024	23.02
		FALSE	High	Sequest HT (A3)	Unambiguous	[R].DELGIAPER.[F]		1	RecPY14His	RecPY14His	0	2	1	0	1	1	500.259	999.511	999.511	0.12	6e-05	HCD (High Energy Collision Dissociation)	MS2	2.11174	67.362	52.0232	16175	PY14_257_109481_P14_A725_20201216_1.raw	F1	2.34		1				226771872	51.73
		FALSE	High	Sequest HT (A3)	Unambiguous	[R].DELGIAPER.[F]		1	RecPY14His	RecPY14His	0	2	1	0	1	1	500.259	999.511	999.511	0.24	0.00012	HCD (High Energy Collision Dissociation)	MS2	0	200	66.891	19448	PY14_257_109481_P14_A725_20201216_1.raw	F1	2.39		1				185724	67.34
		FALSE	High	Sequest HT (A3)	Unambiguous	[R].DELGIAPER.[F]		1	RecPY14His	RecPY14His	0	2	1	0	1	1	500.259	999.511	999.511	0.48	0.00024	HCD (High Energy Collision Dissociation)	MS2	3.41472	7.306	25.5957	6858	PY14_257_109481_P14_A725_20201216_1.raw	F1	2.48		1				4709830144	24.43
		FALSE	High	Sequest HT (A3)	Unambiguous	[R].DELGIAPER.[F]		1	RecPY14His	RecPY14His	0	2	1	0	1	1	500.259	999.511	999.511	0.24	0.00012	HCD (High Energy Collision Dissociation)	MS2	1.3775	200	66.6346	19396	PY14_257_109481_P14_A725_20201216_1.raw	F1	2.54		1				656808	66.59
		FALSE	High	Sequest HT (A3)	Unambiguous	[R].DELGIAPER.[F]		1	RecPY14His	RecPY14His	0	2	1	0	1	1	500.259	999.511	999.511	0.3	0.00015	HCD (High Energy Collision Dissociation)	MS2	2.50086	200	66.379	19344	PY14_257_109481_P14_A725_20201216_1.raw	F1	2.36		1				380101	66.28
		FALSE	High	Sequest HT (A3)	Unambiguous	[R].DELGIAPER.[F]		1	RecPY14His	RecPY14His	0	2	1	0	1	1	500.259	999.511	999.511	0.24	0.00012	HCD (High Energy Collision Dissociation)	MS2	3.31328	7.72	25.3294	6750	PY14_257_109481_P14_A725_20201216_1.raw	F1	2.4		1				4709830144	24.43
		FALSE	High	Mascot (A5)	Unambiguous	[R].DELGIAPER.[F]		1	RecPY14His	RecPY14His	0	2	1	0	1	1	500.259	999.511	999.511	0.73	0.00036	HCD (High Energy Collision Dissociation)	MS2	25.4292	200	47.6854	14697	PY14_273_109186_PY14-20_A725-20200724_3.raw	F2		27	1	13	13	0.00041115	16539502	47.82
		FALSE	High	Sequest HT (A3)	Unambiguous	[R].DELGIAPER.[F]		1	RecPY14His	RecPY14His	0	2	1	0	1	1	500.258	999.508	999.511	-2.2	-0.0011	HCD (High Energy Collision Dissociation)	MS2	6.69451	1.635	21.1732	4962	PY14_257_109481_P14_A725_20201216_1.raw	F1	2.74		1				488286715904	21.57
		FALSE	High	Sequest HT (A3)	Unambiguous	[R].DELGIAPER.[F]		1	RecPY14His	RecPY14His	0	2	1	0	1	1	500.26	999.512	999.511	1.71	0.00085	HCD (High Energy Collision Dissociation)	MS2	0.254059	0.03	18.6969	4898	PY14_273_109186_PY14-20_A725-20200724_3.raw	F2	2.65		1				380120563712	18.77
		FALSE	High	Mascot (A5)	Unambiguous	[R].DELGIAPER.[F]		1	RecPY14His	RecPY14His	0	2	1	0	1	1	500.26	999.512	999.511	1.77	0.00088	HCD (High Energy Collision Dissociation)	MS2	29.9552	52.39	43.5064	13939	PY14_257_109481_P14_A725_20201216_1.raw	F1		32	1	13	13	0.000140929	53118608	42.96
		FALSE	High	Mascot (A5)	Unambiguous	[R].DELGIAPER.[F]		1	RecPY14His	RecPY14His	0	2	1	0	1	1	500.26	999.512	999.511	1.71	0.00085	HCD (High Energy Collision Dissociation)	MS2	28.4987	122.164	42.619	13661	PY14_257_109481_P14_A725_20201216_1.raw	F1		35	1	13	13	6.45654e-05	90034048	42.48
		FALSE	High	Mascot (A5)	Unambiguous	[R].DELGIAPER.[F]		1	RecPY14His	RecPY14His	0	2	1	0	1	1	500.26	999.512	999.511	1.71	0.00085	HCD (High Energy Collision Dissociation)	MS2	18.1245	41.954	35.9021	11252	PY14_257_109481_P14_A725_20201216_1.raw	F1		42	1	13	13	1.21899e-05	186843280	35.69
		FALSE	High	Mascot (A5)	Unambiguous	[R].DELGIAPER.[F]		1	RecPY14His	RecPY14His	0	2	1	0	1	1	500.26	999.512	999.511	1.71	0.00085	HCD (High Energy Collision Dissociation)	MS2	0.254059	0.03	18.6969	4898	PY14_273_109186_PY14-20_A725-20200724_3.raw	F2		42	1	13	13	1.21899e-05	380120563712	18.77
		FALSE	High	Mascot (A5)	Unambiguous	[R].DELGIAPER.[F]		1	RecPY14His	RecPY14His	0	2	1	0	1	1	500.26	999.512	999.511	1.22	0.00061	HCD (High Energy Collision Dissociation)	MS2	43.3639	135.734	37.5762	12010	PY14_273_109186_PY14-20_A725-20200724_3.raw	F2		29	1	13	13	0.000224388	27952984	37.34
		FALSE	High	Mascot (A5)	Unambiguous	[R].DELGIAPER.[F]		1	RecPY14His	RecPY14His	0	2	1	0	1	1	500.26	999.512	999.511	1.71	0.00085	HCD (High Energy Collision Dissociation)	MS2	13.1467	48.446	26.899	8321	PY14_273_109186_PY14-20_A725-20200724_3.raw	F2		26	1	13	13	0.00052723	366863616	27.34
		FALSE	High	Sequest HT (A3)	Unambiguous	[R].DELGIAPER.[F]		1	RecPY14His	RecPY14His	0	2	1	0	1	1	500.259	999.51	999.511	-0.68	-0.00034	HCD (High Energy Collision Dissociation)	MS2	41.5247	43.758	46.5797	14860	PY14_257_109481_P14_A725_20201216_1.raw	F1	2.26		1				69870792	46.65
		FALSE	High	Mascot (A5)	Unambiguous	[R].DELGIAPER.[F]		1	RecPY14His	RecPY14His	0	2	1	0	1	1	500.26	999.512	999.511	1.77	0.00088	HCD (High Energy Collision Dissociation)	MS2	35.8335	52.155	47.4557	15106	PY14_257_109481_P14_A725_20201216_1.raw	F1		40	1	13	13	2.22844e-05	21693048	47.47
		FALSE	High	Mascot (A5)	Unambiguous	[R].DELGIAPER.[F]		1	RecPY14His	RecPY14His	0	2	1	0	1	1	500.26	999.512	999.511	1.52	0.00076	HCD (High Energy Collision Dissociation)	MS2	33.6746	35.19	31.4834	9504	PY14_257_109481_P14_A725_20201216_1.raw	F1		36	1	13	13	4.4978e-05	374680000	31.13
		FALSE	High	Mascot (A5)	Unambiguous	[R].DELGIAPER.[F]		1	RecPY14His	RecPY14His	0	2	1	0	1	1	500.26	999.512	999.511	1.46	0.00073	HCD (High Energy Collision Dissociation)	MS2	51.4005	55.533	44.3785	14216	PY14_257_109481_P14_A725_20201216_1.raw	F1		32	1	13	13	0.000123027	36843932	44.3
		FALSE	High	Mascot (A5)	Unambiguous	[R].DELGIAPER.[F]		1	RecPY14His	RecPY14His	0	2	1	0	1	1	500.26	999.512	999.511	1.46	0.00073	HCD (High Energy Collision Dissociation)	MS2	33.9979	53.72	45.1205	14437	PY14_257_109481_P14_A725_20201216_1.raw	F1		42	1	13	13	1.39959e-05	107988280	45.25
		FALSE	High	Mascot (A5)	Unambiguous	[R].DELGIAPER.[F]		1	RecPY14His	RecPY14His	0	2	1	0	1	1	500.26	999.512	999.511	1.46	0.00073	HCD (High Energy Collision Dissociation)	MS2	38.1357	44.423	44.7842	14336	PY14_257_109481_P14_A725_20201216_1.raw	F1		41	1	13	13	1.48252e-05	74348056	44.87
		FALSE	High	Sequest HT (A3)	Unambiguous	[R].DELGIAPER.[F]		1	RecPY14His	RecPY14His	0	2	1	0	1	1	500.259	999.511	999.511	0.36	0.00018	HCD (High Energy Collision Dissociation)	MS2	0	200	63.5441	18763	PY14_257_109481_P14_A725_20201216_1.raw	F1	2.56		1				196982	63.55
		FALSE	High	Mascot (A5)	Unambiguous	[R].DELGIAPER.[F]		1	RecPY14His	RecPY14His	0	2	1	0	1	1	500.26	999.512	999.511	1.46	0.00073	HCD (High Energy Collision Dissociation)	MS2	18.3931	35.022	41.1089	13194	PY14_257_109481_P14_A725_20201216_1.raw	F1		40	1	13	13	1.94536e-05	139889536	41.37
		FALSE	High	Mascot (A5)	Unambiguous	[R].DELGIAPER.[F]		1	RecPY14His	RecPY14His	0	2	1	0	1	1	500.26	999.512	999.511	1.46	0.00073	HCD (High Energy Collision Dissociation)	MS2	5.65379	25.495	28.0934	8036	PY14_257_109481_P14_A725_20201216_1.raw	F1		35	1	13	13	6.45654e-05	488042976	27.93
		FALSE	High	Mascot (A5)	Unambiguous	[R].DELGIAPER.[F]		1	RecPY14His	RecPY14His	0	2	1	0	1	1	500.26	999.512	999.511	1.46	0.00073	HCD (High Energy Collision Dissociation)	MS2	0	22.959	28.3638	8166	PY14_257_109481_P14_A725_20201216_1.raw	F1		38	1	13	13	3.1989e-05	182171392	28.44
		FALSE	High	Mascot (A5)	Unambiguous	[R].DELGIAPER.[F]		1	RecPY14His	RecPY14His	0	2	1	0	1	1	500.26	999.512	999.511	1.52	0.00076	HCD (High Energy Collision Dissociation)	MS2	18.5094	146.453	36.9084	11816	PY14_273_109186_PY14-20_A725-20200724_3.raw	F2		32	1	13	13	0.000116145	56853908	36.76
		FALSE	High	Mascot (A5)	Unambiguous	[R].DELGIAPER.[F]		1	RecPY14His	RecPY14His	0	2	1	0	1	1	500.259	999.511	999.511	0.24	0.00012	HCD (High Energy Collision Dissociation)	MS2	1.01838	200	61.9963	18442	PY14_257_109481_P14_A725_20201216_1.raw	F1		43	1	13	13	1.10154e-05	478316	61.91
		FALSE	High	Mascot (A5)	Unambiguous	[R].DELGIAPER.[F]		1	RecPY14His	RecPY14His	0	2	1	0	1	1	500.26	999.512	999.511	1.83	0.00091	HCD (High Energy Collision Dissociation)	MS2	40.5246	54.557	46.3247	14788	PY14_257_109481_P14_A725_20201216_1.raw	F1		46	1	13	13	5.48277e-06	74497296	46.33
		FALSE	High	Mascot (A5)	Unambiguous	[R].DELGIAPER.[F]		1	RecPY14His	RecPY14His	0	2	1	0	1	1	500.26	999.513	999.511	2.01	0.001	HCD (High Energy Collision Dissociation)	MS2	31.4911	39.386	45.4821	14545	PY14_257_109481_P14_A725_20201216_1.raw	F1		40	1	13	13	2.09411e-05	107988280	45.25
		FALSE	High	Mascot (A5)	Unambiguous	[R].DELGIAPER.[F]		1	RecPY14His	RecPY14His	0	2	1	0	1	1	500.259	999.511	999.511	0.73	0.00036	HCD (High Energy Collision Dissociation)	MS2	30.17	200	47.4279	14631	PY14_273_109186_PY14-20_A725-20200724_3.raw	F2		42	1	13	13	1.2331e-05	10370473	47.28
		FALSE	High	Mascot (A5)	Unambiguous	[R].DELGIAPER.[F]		1	RecPY14His	RecPY14His	0	2	1	0	1	1	500.259	999.511	999.511	0.67	0.00033	HCD (High Energy Collision Dissociation)	MS2	18.558	44.864	41.3994	13287	PY14_257_109481_P14_A725_20201216_1.raw	F1		39	1	13	13	2.25424e-05	139889536	41.37
		FALSE	High	Mascot (A5)	Unambiguous	[R].DELGIAPER.[F]		1	RecPY14His	RecPY14His	0	2	1	0	1	1	500.259	999.511	999.511	0.67	0.00033	HCD (High Energy Collision Dissociation)	MS2	28.2524	108.123	31.4036	9951	PY14_273_109186_PY14-20_A725-20200724_3.raw	F2		41	1	13	13	1.59956e-05	108958312	31.43
		FALSE	High	Sequest HT (A3)	Unambiguous	[R].DELGIAPER.[F]		1	RecPY14His	RecPY14His	0	2	1	0	1	1	500.258	999.509	999.511	-1.59	-0.0008	HCD (High Energy Collision Dissociation)	MS2	0.350518	0.03	18.9545	5006	PY14_273_109186_PY14-20_A725-20200724_3.raw	F2	2.13		1				380120563712	18.77
		FALSE	High	Sequest HT (A3)	Unambiguous	[R].DELGIAPER.[F]		1	RecPY14His	RecPY14His	0	2	1	0	1	1	500.259	999.511	999.511	0.18	9e-05	HCD (High Energy Collision Dissociation)	MS2	0.876321	93.281	52.834	16386	PY14_257_109481_P14_A725_20201216_1.raw	F1	2.51		1				290801728	53.78
		FALSE	High	Mascot (A5)	Unambiguous	[R].DELGIAPER.[F]		1	RecPY14His	RecPY14His	0	2	1	0	1	1	500.259	999.511	999.511	0.67	0.00033	HCD (High Energy Collision Dissociation)	MS2	9.44969	168.069	38.4002	12241	PY14_273_109186_PY14-20_A725-20200724_3.raw	F2		44	1	13	13	8.26038e-06	51785052	38.49
		FALSE	High	Mascot (A5)	Unambiguous	[R].DELGIAPER.[F]		1	RecPY14His	RecPY14His	0	2	1	0	1	1	500.259	999.511	999.511	0.67	0.00033	HCD (High Energy Collision Dissociation)	MS2	5.55813	9.027	23.1329	6712	PY14_273_109186_PY14-20_A725-20200724_3.raw	F2		42	1	13	13	1.30317e-05	4809799680	22.54
		FALSE	High	Mascot (A5)	Unambiguous	[R].DELGIAPER.[F]		1	RecPY14His	RecPY14His	0	2	1	0	1	1	500.26	999.512	999.511	1.83	0.00091	HCD (High Energy Collision Dissociation)	MS2	29.6969	162.72	37.7054	12018	PY14_257_109481_P14_A725_20201216_1.raw	F1		37	1	13	13	3.81066e-05	81282648	37.63
		FALSE	High	Mascot (A5)	Unambiguous	[R].DELGIAPER.[F]		1	RecPY14His	RecPY14His	0	2	1	0	1	1	500.259	999.511	999.511	0.67	0.00033	HCD (High Energy Collision Dissociation)	MS2	3.09384	200	69.4697	19389	PY14_273_109186_PY14-20_A725-20200724_3.raw	F2		27	1	13	13	0.000357273	136955	69.38
		FALSE	Medium	Sequest HT (A3)	Unambiguous	[R].DELGIAPER.[F]		1	RecPY14His	RecPY14His	0	2	1	0	1	1	500.259	999.511	999.511	0.18	9e-05	HCD (High Energy Collision Dissociation)	MS2	0	200	67.6752	19037	PY14_273_109186_PY14-20_A725-20200724_3.raw	F2	1.21		1
		FALSE	High	Mascot (A5)	Unambiguous	[R].DELGIAPER.[F]		1	RecPY14His	RecPY14His	0	2	1	0	1	1	500.259	999.512	999.511	1.09	0.00055	HCD (High Energy Collision Dissociation)	MS2	0	155.741	36.6168	11726	PY14_273_109186_PY14-20_A725-20200724_3.raw	F2		40	1	13	13	2.07014e-05	56853908	36.76
		FALSE	High	Mascot (A5)	Unambiguous	[R].DELGIAPER.[F]		1	RecPY14His	RecPY14His	0	2	1	0	1	1	500.26	999.512	999.511	1.34	0.00067	HCD (High Energy Collision Dissociation)	MS2	6.36735	5.396	25.0721	6638	PY14_257_109481_P14_A725_20201216_1.raw	F1		42	1	13	13	1.14815e-05	4709830144	24.43
		FALSE	High	Mascot (A5)	Unambiguous	[R].DELGIAPER.[F]		1	RecPY14His	RecPY14His	0	2	1	0	1	1	500.26	999.513	999.511	2.07	0.00104	HCD (High Energy Collision Dissociation)	MS2	43.6982	75.411	40.5476	13017	PY14_257_109481_P14_A725_20201216_1.raw	F1		40	1	13	13	1.79061e-05	139326128	40.62
		FALSE	High	Mascot (A5)	Unambiguous	[R].DELGIAPER.[F]		1	RecPY14His	RecPY14His	0	2	1	0	1	1	500.26	999.513	999.511	2.07	0.00104	HCD (High Energy Collision Dissociation)	MS2	50.633	33.572	45.7738	14631	PY14_257_109481_P14_A725_20201216_1.raw	F1		38	1	13	13	3.4435e-05	27887332	45.81
		FALSE	High	Mascot (A5)	Unambiguous	[R].DELGIAPER.[F]		1	RecPY14His	RecPY14His	0	2	1	0	1	1	500.26	999.513	999.511	2.01	0.001	HCD (High Energy Collision Dissociation)	MS2	21.0105	63.354	40.8296	13107	PY14_257_109481_P14_A725_20201216_1.raw	F1		39	1	13	13	2.69153e-05	139326128	40.62
		FALSE	High	Mascot (A5)	Unambiguous	[R].DELGIAPER.[F]		1	RecPY14His	RecPY14His	0	2	1	0	1	1	500.26	999.513	999.511	2.01	0.001	HCD (High Energy Collision Dissociation)	MS2	24.2188	42.674	42.9346	13765	PY14_257_109481_P14_A725_20201216_1.raw	F1		37	1	13	13	4.2658e-05	53118608	42.96
		FALSE	High	Mascot (A5)	Unambiguous	[R].DELGIAPER.[F]		1	RecPY14His	RecPY14His	0	2	1	0	1	1	500.259	999.511	999.511	0.73	0.00036	HCD (High Energy Collision Dissociation)	MS2	42.7222	40.514	27.8285	8672	PY14_273_109186_PY14-20_A725-20200724_3.raw	F2		39	1	13	13	2.56448e-05	366863616	27.34
		FALSE	High	Sequest HT (A3)	Unambiguous	[R].DELGIAPER.[F]		1	RecPY14His	RecPY14His	0	2	1	0	1	1	500.26	999.512	999.511	1.34	0.00067	HCD (High Energy Collision Dissociation)	MS2	6.36735	5.396	25.0721	6638	PY14_257_109481_P14_A725_20201216_1.raw	F1	2.47		1				4709830144	24.43
		FALSE	High	Mascot (A5)	Unambiguous	[R].DELGIAPER.[F]		1	RecPY14His	RecPY14His	0	2	1	0	1	1	500.259	999.511	999.511	0.24	0.00012	HCD (High Energy Collision Dissociation)	MS2	1.33874	200	64.5788	18974	PY14_257_109481_P14_A725_20201216_1.raw	F1		41	1	13	13	1.55955e-05	387844	64.78
		FALSE	High	Mascot (A5)	Unambiguous	[R].DELGIAPER.[F]		1	RecPY14His	RecPY14His	0	2	1	0	1	1	500.259	999.511	999.511	0.24	0.00012	HCD (High Energy Collision Dissociation)	MS2	2.12279	200	62.5124	18548	PY14_257_109481_P14_A725_20201216_1.raw	F1		44	1	13	13	7.70903e-06	232160	62.18
		FALSE	High	Sequest HT (A3)	Unambiguous	[R].DELGIAPER.[F]		1	RecPY14His	RecPY14His	0	2	1	0	1	1	500.259	999.511	999.511	0.12	6e-05	HCD (High Energy Collision Dissociation)	MS2	2.1058	200	57.852	17555	PY14_257_109481_P14_A725_20201216_1.raw	F1	2.52		1				5070592	57.75
		FALSE	High	Sequest HT (A3)	Unambiguous	[R].DELGIAPER.[F]		1	RecPY14His	RecPY14His	0	2	1	0	1	1	500.259	999.511	999.511	0.06	3e-05	HCD (High Energy Collision Dissociation)	MS2	2.41733	200	55.8553	16647	PY14_273_109186_PY14-20_A725-20200724_3.raw	F2	2.26		1				2749214	55.78
		FALSE	High	Sequest HT (A3)	Unambiguous	[R].DELGIAPER.[F]		1	RecPY14His	RecPY14His	0	2	1	0	1	1	500.259	999.511	999.511	0.06	3e-05	HCD (High Energy Collision Dissociation)	MS2	8.62452	200	55.334	16525	PY14_273_109186_PY14-20_A725-20200724_3.raw	F2	2.34		1				4061082	55.28
		FALSE	High	Sequest HT (A3)	Unambiguous	[R].DELGIAPER.[F]		1	RecPY14His	RecPY14His	0	2	1	0	1	1	500.261	999.515	999.511	4.15	0.00207	HCD (High Energy Collision Dissociation)	MS2	19.8558	35.708	32.3302	9865	PY14_257_109481_P14_A725_20201216_1.raw	F1	2.63		1				108576392	32.32
		FALSE	High	Mascot (A5)	Unambiguous	[R].DELGIAPER.[F]		1	RecPY14His	RecPY14His	0	2	1	0	1	1	500.258	999.509	999.511	-1.23	-0.00061	HCD (High Energy Collision Dissociation)	MS2	20.7743	29.787	32.609	9971	PY14_257_109481_P14_A725_20201216_1.raw	F1		37	1	13	13	3.81066e-05	214883248	32.64
		FALSE	High	Mascot (A5)	Unambiguous	[R].DELGIAPER.[F]		1	RecPY14His	RecPY14His	0	2	1	0	1	1	500.259	999.511	999.511	0.36	0.00018	HCD (High Energy Collision Dissociation)	MS2	1.34278	200	64.8391	19028	PY14_257_109481_P14_A725_20201216_1.raw	F1		46	1	13	13	5.03501e-06	387844	64.78
		FALSE	High	Mascot (A5)	Unambiguous	[R].DELGIAPER.[F]		1	RecPY14His	RecPY14His	0	2	1	0	1	1	500.259	999.511	999.511	0.36	0.00018	HCD (High Energy Collision Dissociation)	MS2	5.25231	200	68.9427	19863	PY14_257_109481_P14_A725_20201216_1.raw	F1		41	1	13	13	1.46893e-05	475364	69.19
		FALSE	High	Mascot (A5)	Unambiguous	[R].DELGIAPER.[F]		1	RecPY14His	RecPY14His	0	2	1	0	1	1	500.259	999.511	999.511	0.36	0.00018	HCD (High Energy Collision Dissociation)	MS2	2.11816	200	65.6119	19186	PY14_257_109481_P14_A725_20201216_1.raw	F1		41	1	13	13	1.56675e-05	198558	65.92
		FALSE	High	Mascot (A5)	Unambiguous	[R].DELGIAPER.[F]		1	RecPY14His	RecPY14His	0	2	1	0	1	1	500.259	999.511	999.511	0.36	0.00018	HCD (High Energy Collision Dissociation)	MS2	1.54498	200	68.1727	19708	PY14_257_109481_P14_A725_20201216_1.raw	F1		54	1	13	13	8.09096e-07	111884	68.16
		FALSE	High	Mascot (A5)	Unambiguous	[R].DELGIAPER.[F]		1	RecPY14His	RecPY14His	0	2	1	0	1	1	500.259	999.511	999.511	0.36	0.00018	HCD (High Energy Collision Dissociation)	MS2	0	200	63.5441	18763	PY14_257_109481_P14_A725_20201216_1.raw	F1		43	1	13	13	1.10662e-05	196982	63.55
		FALSE	High	Mascot (A5)	Unambiguous	[R].DELGIAPER.[F]		1	RecPY14His	RecPY14His	0	2	1	0	1	1	500.259	999.511	999.511	0.36	0.00018	HCD (High Energy Collision Dissociation)	MS2	1.25147	200	65.8635	19238	PY14_257_109481_P14_A725_20201216_1.raw	F1		41	1	13	13	1.53462e-05	198558	65.92
		FALSE	High	Mascot (A5)	Unambiguous	[R].DELGIAPER.[F]		1	RecPY14His	RecPY14His	0	2	1	0	1	1	500.259	999.511	999.511	0.36	0.00018	HCD (High Energy Collision Dissociation)	MS2	17.8464	187.295	43.5469	13621	PY14_273_109186_PY14-20_A725-20200724_3.raw	F2		39	1	13	13	2.25424e-05	81564488	43.27
		FALSE	High	Sequest HT (A3)	Unambiguous	[R].DELGIAPER.[F]		1	RecPY14His	RecPY14His	0	2	1	0	1	1	500.259	999.511	999.511	0.73	0.00036	HCD (High Energy Collision Dissociation)	MS2	42.7222	40.514	27.8285	8672	PY14_273_109186_PY14-20_A725-20200724_3.raw	F2	2.33		1				366863616	27.34
		FALSE	High	Mascot (A5)	Unambiguous	[R].DELGIAPER.[F]		1	RecPY14His	RecPY14His	0	2	1	0	1	1	500.259	999.511	999.511	0.36	0.00018	HCD (High Energy Collision Dissociation)	MS2	0	200	63.2868	18710	PY14_257_109481_P14_A725_20201216_1.raw	F1		46	1	13	13	4.86407e-06	196982	63.55
		FALSE	High	Mascot (A5)	Unambiguous	[R].DELGIAPER.[F]		1	RecPY14His	RecPY14His	0	2	1	0	1	1	500.259	999.511	999.511	0.36	0.00018	HCD (High Energy Collision Dissociation)	MS2	23.96	175.467	46.1659	14302	PY14_273_109186_PY14-20_A725-20200724_3.raw	F2		38	1	13	13	3.10456e-05	20022784	46.12
		FALSE	Medium	Sequest HT (A3)	Unambiguous	[R].DELGIAPER.[F]		1	RecPY14His	RecPY14His	0	2	1	0	1	1	500.259	999.511	999.511	0.12	6e-05	HCD (High Energy Collision Dissociation)	MS2	0	200	63.8171	18274	PY14_273_109186_PY14-20_A725-20200724_3.raw	F2	1.78		1
		FALSE	High	Sequest HT (A3)	Unambiguous	[R].DELGIAPER.[F]		1	RecPY14His	RecPY14His	0	2	1	0	1	1	500.26	999.513	999.511	2.01	0.001	HCD (High Energy Collision Dissociation)	MS2	31.4911	39.386	45.4821	14545	PY14_257_109481_P14_A725_20201216_1.raw	F1	2.45		1				107988280	45.25
		FALSE	Medium	Sequest HT (A3)	Unambiguous	[R].DELGIAPER.[F]		1	RecPY14His	RecPY14His	0	2	1	0	1	1	500.259	999.511	999.511	0.18	9e-05	HCD (High Energy Collision Dissociation)	MS2	2.37388	200	61.2377	17756	PY14_273_109186_PY14-20_A725-20200724_3.raw	F2	1.62		1
		FALSE	Medium	Sequest HT (A3)	Unambiguous	[R].DELGIAPER.[F]		1	RecPY14His	RecPY14His	0	2	1	0	1	1	500.259	999.511	999.511	0.48	0.00024	HCD (High Energy Collision Dissociation)	MS2	0	200	61.4924	17810	PY14_273_109186_PY14-20_A725-20200724_3.raw	F2	1.81		1
		FALSE	Medium	Sequest HT (A3)	Unambiguous	[R].DELGIAPER.[F]		1	RecPY14His	RecPY14His	0	2	1	0	1	1	500.259	999.511	999.511	0.36	0.00018	HCD (High Energy Collision Dissociation)	MS2	6.59382	200	65.365	18580	PY14_273_109186_PY14-20_A725-20200724_3.raw	F2	1.82		1
		FALSE	Medium	Sequest HT (A3)	Unambiguous	[R].DELGIAPER.[F]		1	RecPY14His	RecPY14His	0	2	1	0	1	1	500.259	999.511	999.511	0.36	0.00018	HCD (High Energy Collision Dissociation)	MS2	2.4874	200	65.1046	18529	PY14_273_109186_PY14-20_A725-20200724_3.raw	F2	1.74		1
		FALSE	High	Sequest HT (A3)	Unambiguous	[R].DELGIAPER.[F]		1	RecPY14His	RecPY14His	0	2	1	0	1	1	500.259	999.51	999.511	-0.13	-6e-05	HCD (High Energy Collision Dissociation)	MS2	4.05452	200	64.8496	18480	PY14_273_109186_PY14-20_A725-20200724_3.raw	F2	1.95		1				175762	65.07
		FALSE	Medium	Sequest HT (A3)	Unambiguous	[R].DELGIAPER.[F]		1	RecPY14His	RecPY14His	0	2	1	0	1	1	500.259	999.51	999.511	-0.31	-0.00015	HCD (High Energy Collision Dissociation)	MS2	2.83293	200	64.5903	18431	PY14_273_109186_PY14-20_A725-20200724_3.raw	F2	1.6		1
		FALSE	Medium	Sequest HT (A3)	Unambiguous	[R].DELGIAPER.[F]		1	RecPY14His	RecPY14His	0	2	1	0	1	1	500.259	999.51	999.511	-0.07	-3e-05	HCD (High Energy Collision Dissociation)	MS2	2.75279	200	64.3256	18377	PY14_273_109186_PY14-20_A725-20200724_3.raw	F2	1.65		1
		FALSE	High	Sequest HT (A3)	Unambiguous	[R].DELGIAPER.[F]		1	RecPY14His	RecPY14His	0	2	1	0	1	1	500.258	999.509	999.511	-1.23	-0.00061	HCD (High Energy Collision Dissociation)	MS2	0	23.018	29.4215	8629	PY14_257_109481_P14_A725_20201216_1.raw	F1	2.57		1				256720320	29.27
		FALSE	Medium	Sequest HT (A3)	Unambiguous	[R].DELGIAPER.[F]		1	RecPY14His	RecPY14His	0	2	1	0	1	1	500.259	999.511	999.511	0.18	9e-05	HCD (High Energy Collision Dissociation)	MS2	0	200	64.069	18328	PY14_273_109186_PY14-20_A725-20200724_3.raw	F2	1.38		1
		FALSE	High	Mascot (A5)	Unambiguous	[R].DELGIAPER.[F]		1	RecPY14His	RecPY14His	0	2	1	0	1	1	500.259	999.511	999.511	0.36	0.00018	HCD (High Energy Collision Dissociation)	MS2	7.39913	164.816	38.6715	12315	PY14_273_109186_PY14-20_A725-20200724_3.raw	F2		46	1	13	13	5.08159e-06	51785052	38.49
		FALSE	Medium	Sequest HT (A3)	Unambiguous	[R].DELGIAPER.[F]		1	RecPY14His	RecPY14His	0	2	1	0	1	1	500.259	999.51	999.511	-0.07	-3e-05	HCD (High Energy Collision Dissociation)	MS2	2.02595	200	63.5647	18225	PY14_273_109186_PY14-20_A725-20200724_3.raw	F2	1.82		1
		FALSE	Medium	Sequest HT (A3)	Unambiguous	[R].DELGIAPER.[F]		1	RecPY14His	RecPY14His	0	2	1	0	1	1	500.259	999.511	999.511	0.18	9e-05	HCD (High Energy Collision Dissociation)	MS2	2.36331	200	63.0541	18124	PY14_273_109186_PY14-20_A725-20200724_3.raw	F2	1.41		1
		FALSE	High	Sequest HT (A3)	Unambiguous	[R].DELGIAPER.[F]		1	RecPY14His	RecPY14His	0	2	1	0	1	1	500.257	999.507	999.511	-3.24	-0.00162	HCD (High Energy Collision Dissociation)	MS2	50.4485	121.876	25.0129	7506	PY14_273_109186_PY14-20_A725-20200724_3.raw	F2	2.58		1				170682656	25.19
		FALSE	Medium	Sequest HT (A3)	Unambiguous	[R].DELGIAPER.[F]		1	RecPY14His	RecPY14His	0	2	1	0	1	1	500.259	999.511	999.511	0.06	3e-05	HCD (High Energy Collision Dissociation)	MS2	2.01089	200	62.792	18071	PY14_273_109186_PY14-20_A725-20200724_3.raw	F2	1.22		1
		FALSE	Medium	Sequest HT (A3)	Unambiguous	[R].DELGIAPER.[F]		1	RecPY14His	RecPY14His	0	2	1	0	1	1	500.259	999.511	999.511	0	0	HCD (High Energy Collision Dissociation)	MS2	0	200	62.5362	18019	PY14_273_109186_PY14-20_A725-20200724_3.raw	F2	1.88		1
		FALSE	Medium	Sequest HT (A3)	Unambiguous	[R].DELGIAPER.[F]		1	RecPY14His	RecPY14His	0	2	1	0	1	1	500.259	999.511	999.511	0.18	9e-05	HCD (High Energy Collision Dissociation)	MS2	1.90149	200	62.2808	17967	PY14_273_109186_PY14-20_A725-20200724_3.raw	F2	1.6		1
		FALSE	Medium	Sequest HT (A3)	Unambiguous	[R].DELGIAPER.[F]		1	RecPY14His	RecPY14His	0	2	1	0	1	1	500.259	999.51	999.511	-0.13	-6e-05	HCD (High Energy Collision Dissociation)	MS2	5.61483	200	62.0132	17911	PY14_273_109186_PY14-20_A725-20200724_3.raw	F2	1.77		1
		FALSE	Medium	Sequest HT (A3)	Unambiguous	[R].DELGIAPER.[F]		1	RecPY14His	RecPY14His	0	2	1	0	1	1	500.259	999.511	999.511	0.06	3e-05	HCD (High Energy Collision Dissociation)	MS2	0	200	61.7523	17860	PY14_273_109186_PY14-20_A725-20200724_3.raw	F2	1.34		1
		FALSE	Medium	Sequest HT (A3)	Unambiguous	[R].DELGIAPER.[F]		1	RecPY14His	RecPY14His	0	2	1	0	1	1	500.259	999.511	999.511	0	0	HCD (High Energy Collision Dissociation)	MS2	0	200	63.3071	18174	PY14_273_109186_PY14-20_A725-20200724_3.raw	F2	1.71		1
		FALSE	High	Sequest HT (A3)	Unambiguous	[R].DELGIAPER.[F]		1	RecPY14His	RecPY14His	0	2	1	0	1	1	500.259	999.51	999.511	-0.8	-0.0004	HCD (High Energy Collision Dissociation)	MS2	29.7533	112.544	24.4935	7270	PY14_273_109186_PY14-20_A725-20200724_3.raw	F2	2.27		1				4809799680	22.54
		FALSE	High	Mascot (A5)	Unambiguous	[R].DELGIAPER.[F]		1	RecPY14His	RecPY14His	0	2	1	0	1	1	500.259	999.511	999.511	0.36	0.00018	HCD (High Energy Collision Dissociation)	MS2	6.30891	13.181	23.4175	6824	PY14_273_109186_PY14-20_A725-20200724_3.raw	F2		40	1	13	13	1.81552e-05	4809799680	22.54
		FALSE	High	Mascot (A5)	Unambiguous	[R].DELGIAPER.[F]		1	RecPY14His	RecPY14His	0	2	1	0	1	1	500.259	999.511	999.511	0.36	0.00018	HCD (High Energy Collision Dissociation)	MS2	13.5267	125.972	37.8457	12086	PY14_273_109186_PY14-20_A725-20200724_3.raw	F2		42	1	13	13	1.25314e-05	27952984	37.34
		FALSE	High	Sequest HT (A3)	Unambiguous	[R].DELGIAPER.[F]		1	RecPY14His	RecPY14His	0	2	1	0	1	1	500.259	999.51	999.511	-0.62	-0.00031	HCD (High Energy Collision Dissociation)	MS2	22.1715	46.983	30.2449	8993	PY14_257_109481_P14_A725_20201216_1.raw	F1	2.82		1				231385456	30.04
		FALSE	High	Sequest HT (A3)	Unambiguous	[R].DELGIAPER.[F]		1	RecPY14His	RecPY14His	0	2	1	0	1	1	500.259	999.511	999.511	0.18	9e-05	HCD (High Energy Collision Dissociation)	MS2	1.45163	200	54.5583	16341	PY14_273_109186_PY14-20_A725-20200724_3.raw	F2	2.31		1				7.87546e+06	54.46
		FALSE	High	Mascot (A5)	Unambiguous	[R].DELGIAPER.[F]		1	RecPY14His	RecPY14His	0	2	1	0	1	1	500.258	999.509	999.511	-1.53	-0.00077	HCD (High Energy Collision Dissociation)	MS2	38.0646	61.109	29.6121	9334	PY14_273_109186_PY14-20_A725-20200724_3.raw	F2		38	1	13	13	3.14051e-05	81425760	29.28
		FALSE	High	Mascot (A5)	Unambiguous	[R].DELGIAPER.[F]		1	RecPY14His	RecPY14His	0	2	1	0	1	1	500.258	999.509	999.511	-1.41	-0.0007	HCD (High Energy Collision Dissociation)	MS2	26.3232	35.001	29.9805	8883	PY14_257_109481_P14_A725_20201216_1.raw	F1		36	1	13	13	5.2723e-05	231385456	30.04
		FALSE	High	Sequest HT (A3)	Unambiguous	[R].DELGIAPER.[F]		1	RecPY14His	RecPY14His	0	2	1	0	1	1	500.26	999.512	999.511	1.71	0.00085	HCD (High Energy Collision Dissociation)	MS2	13.1467	48.446	26.899	8321	PY14_273_109186_PY14-20_A725-20200724_3.raw	F2	2.24		1				366863616	27.34
		FALSE	High	Sequest HT (A3)	Unambiguous	[R].DELGIAPER.[F]		1	RecPY14His	RecPY14His	0	2	1	0	1	1	500.259	999.511	999.511	0.18	9e-05	HCD (High Energy Collision Dissociation)	MS2	1.32067	200	54.2881	16276	PY14_273_109186_PY14-20_A725-20200724_3.raw	F2	2.22		1				11384201	54.21
		FALSE	High	Sequest HT (A3)	Unambiguous	[R].DELGIAPER.[F]		1	RecPY14His	RecPY14His	0	2	1	0	1	1	500.259	999.511	999.511	0.06	3e-05	HCD (High Energy Collision Dissociation)	MS2	2.76413	153.868	54.016	16211	PY14_273_109186_PY14-20_A725-20200724_3.raw	F2	2.18		1				25844196	53.87
		FALSE	High	Sequest HT (A3)	Unambiguous	[R].DELGIAPER.[F]		1	RecPY14His	RecPY14His	0	2	1	0	1	1	500.259	999.511	999.511	0.24	0.00012	HCD (High Energy Collision Dissociation)	MS2	0	200	57.5942	17498	PY14_257_109481_P14_A725_20201216_1.raw	F1	2.58		1				5070592	57.75
		FALSE	High	Mascot (A5)	Unambiguous	[R].DELGIAPER.[F]		1	RecPY14His	RecPY14His	0	2	1	0	1	1	500.259	999.511	999.511	0.12	6e-05	HCD (High Energy Collision Dissociation)	MS2	0	200	63.8171	18274	PY14_273_109186_PY14-20_A725-20200724_3.raw	F2		47	1	13	13	4.23643e-06	431909	63.99
		FALSE	High	Sequest HT (A3)	Unambiguous	[R].DELGIAPER.[F]		1	RecPY14His	RecPY14His	0	2	1	0	1	1	500.259	999.511	999.511	0.18	9e-05	HCD (High Energy Collision Dissociation)	MS2	4.78779	145.866	53.7597	16149	PY14_273_109186_PY14-20_A725-20200724_3.raw	F2	2.41		1				25844196	53.87
		FALSE	High	Sequest HT (A3)	Unambiguous	[R].DELGIAPER.[F]		1	RecPY14His	RecPY14His	0	2	1	0	1	1	500.26	999.512	999.511	1.46	0.00073	HCD (High Energy Collision Dissociation)	MS2	33.9979	53.72	45.1205	14437	PY14_257_109481_P14_A725_20201216_1.raw	F1	2.37		1				107988280	45.25
		FALSE	High	Sequest HT (A3)	Unambiguous	[R].DELGIAPER.[F]		1	RecPY14His	RecPY14His	0	2	1	0	1	1	500.259	999.511	999.511	0.24	0.00012	HCD (High Energy Collision Dissociation)	MS2	8.13075	200	53.4921	16083	PY14_273_109186_PY14-20_A725-20200724_3.raw	F2	2.32		1				22610580	53.51
		FALSE	High	Sequest HT (A3)	Unambiguous	[R].DELGIAPER.[F]		1	RecPY14His	RecPY14His	0	2	1	0	1	1	500.261	999.514	999.511	3.66	0.00183	HCD (High Energy Collision Dissociation)	MS2	15.4915	76.258	32.048	9740	PY14_257_109481_P14_A725_20201216_1.raw	F1	2.71		1				108576392	32.32
		FALSE	High	Sequest HT (A3)	Unambiguous	[R].DELGIAPER.[F]		1	RecPY14His	RecPY14His	0	2	1	0	1	1	500.26	999.512	999.511	1.52	0.00076	HCD (High Energy Collision Dissociation)	MS2	33.6746	35.19	31.4834	9504	PY14_257_109481_P14_A725_20201216_1.raw	F1	2.6		1				374680000	31.13
		FALSE	High	Sequest HT (A3)	Unambiguous	[R].DELGIAPER.[F]		1	RecPY14His	RecPY14His	0	2	1	0	1	1	500.259	999.511	999.511	0.24	0.00012	HCD (High Energy Collision Dissociation)	MS2	0	200	57.3327	17441	PY14_257_109481_P14_A725_20201216_1.raw	F1	2.54		1				4.46769e+06	57.44
		FALSE	High	Mascot (A5)	Unambiguous	[R].DELGIAPER.[F]		1	RecPY14His	RecPY14His	0	2	1	0	1	1	500.258	999.509	999.511	-1.59	-0.0008	HCD (High Energy Collision Dissociation)	MS2	0.350518	0.03	18.9545	5006	PY14_273_109186_PY14-20_A725-20200724_3.raw	F2		42	1	13	13	1.15878e-05	380120563712	18.77
		FALSE	High	Sequest HT (A3)	Unambiguous	[R].DELGIAPER.[F]		1	RecPY14His	RecPY14His	0	2	1	0	1	1	500.259	999.511	999.511	0.12	6e-05	HCD (High Energy Collision Dissociation)	MS2	2.13714	200	54.8247	16406	PY14_273_109186_PY14-20_A725-20200724_3.raw	F2	2.23		1				5.8878e+06	54.72
		FALSE	High	Sequest HT (A3)	Unambiguous	[R].DELGIAPER.[F]		1	RecPY14His	RecPY14His	0	2	1	0	1	1	500.258	999.509	999.511	-1.41	-0.0007	HCD (High Energy Collision Dissociation)	MS2	26.3232	35.001	29.9805	8883	PY14_257_109481_P14_A725_20201216_1.raw	F1	2.62		1				231385456	30.04
		FALSE	High	Sequest HT (A3)	Unambiguous	[R].DELGIAPER.[F]		1	RecPY14His	RecPY14His	0	2	1	0	1	1	500.259	999.511	999.511	0.18	9e-05	HCD (High Energy Collision Dissociation)	MS2	1.01935	200	55.0811	16467	PY14_273_109186_PY14-20_A725-20200724_3.raw	F2	2.2		1				4.99394e+06	55.05
		FALSE	High	Sequest HT (A3)	Unambiguous	[R].DELGIAPER.[F]		1	RecPY14His	RecPY14His	0	2	1	0	1	1	500.258	999.509	999.511	-1.23	-0.00061	HCD (High Energy Collision Dissociation)	MS2	20.7743	29.787	32.609	9971	PY14_257_109481_P14_A725_20201216_1.raw	F1	2.54		1				214883248	32.64
		FALSE	High	Mascot (A5)	Unambiguous	[R].DELGIAPER.[F]		1	RecPY14His	RecPY14His	0	2	1	0	1	1	500.259	999.511	999.511	0.36	0.00018	HCD (High Energy Collision Dissociation)	MS2	6.59382	200	65.365	18580	PY14_273_109186_PY14-20_A725-20200724_3.raw	F2		50	1	13	13	2.11349e-06	175762	65.07
		FALSE	High	Mascot (A5)	Unambiguous	[R].DELGIAPER.[F]		1	RecPY14His	RecPY14His	0	2	1	0	1	1	500.259	999.511	999.511	0.36	0.00018	HCD (High Energy Collision Dissociation)	MS2	3.49898	200	56.6141	16812	PY14_273_109186_PY14-20_A725-20200724_3.raw	F2		55	1	13	13	6.09537e-07	1.25591e+06	56.59
		FALSE	High	Sequest HT (A3)	Unambiguous	[R].DELGIAPER.[F]		1	RecPY14His	RecPY14His	0	2	1	0	1	1	500.259	999.51	999.511	-0.8	-0.0004	HCD (High Energy Collision Dissociation)	MS2	19.2366	102.135	28.0926	8770	PY14_273_109186_PY14-20_A725-20200724_3.raw	F2	2.3		1				366863616	27.34
		FALSE	High	Mascot (A5)	Unambiguous	[R].DELGIAPER.[F]		1	RecPY14His	RecPY14His	0	2	1	0	1	1	500.259	999.511	999.511	0.36	0.00018	HCD (High Energy Collision Dissociation)	MS2	2.4874	200	65.1046	18529	PY14_273_109186_PY14-20_A725-20200724_3.raw	F2		33	1	13	13	0.000110917	175762	65.07
		FALSE	High	Mascot (A5)	Unambiguous	[R].DELGIAPER.[F]		1	RecPY14His	RecPY14His	0	2	1	0	1	1	500.259	999.511	999.511	0.3	0.00015	HCD (High Energy Collision Dissociation)	MS2	3.64738	180.455	55.2345	16980	PY14_257_109481_P14_A725_20201216_1.raw	F1		43	1	13	13	1.12202e-05	15103224	55.02
		FALSE	High	Mascot (A5)	Unambiguous	[R].DELGIAPER.[F]		1	RecPY14His	RecPY14His	0	2	1	0	1	1	500.259	999.511	999.511	0.3	0.00015	HCD (High Energy Collision Dissociation)	MS2	1.24014	200	56.2946	17206	PY14_257_109481_P14_A725_20201216_1.raw	F1		43	1	13	13	1.00925e-05	7.05448e+06	56.36
		FALSE	High	Sequest HT (A3)	Unambiguous	[R].DELGIAPER.[F]		1	RecPY14His	RecPY14His	0	2	1	0	1	1	500.259	999.511	999.511	0.24	0.00012	HCD (High Energy Collision Dissociation)	MS2	0.712524	55.308	53.6669	16605	PY14_257_109481_P14_A725_20201216_1.raw	F1	2.63		1				290801728	53.78
		FALSE	High	Sequest HT (A3)	Unambiguous	[R].DELGIAPER.[F]		1	RecPY14His	RecPY14His	0	2	1	0	1	1	500.26	999.512	999.511	1.46	0.00073	HCD (High Energy Collision Dissociation)	MS2	38.1357	44.423	44.7842	14336	PY14_257_109481_P14_A725_20201216_1.raw	F1	2.21		1				74348056	44.87
		FALSE	High	Mascot (A5)	Unambiguous	[R].DELGIAPER.[F]		1	RecPY14His	RecPY14His	0	2	1	0	1	1	500.259	999.511	999.511	0.3	0.00015	HCD (High Energy Collision Dissociation)	MS2	1.02175	200	56.5523	17264	PY14_257_109481_P14_A725_20201216_1.raw	F1		45	1	13	13	6.96627e-06	8068414	56.02
		FALSE	High	Mascot (A5)	Unambiguous	[R].DELGIAPER.[F]		1	RecPY14His	RecPY14His	0	2	1	0	1	1	500.259	999.511	999.511	0.3	0.00015	HCD (High Energy Collision Dissociation)	MS2	1.59312	200	59.142	17837	PY14_257_109481_P14_A725_20201216_1.raw	F1		41	1	13	13	1.56675e-05	1.37784e+06	59.38
		FALSE	High	Sequest HT (A3)	Unambiguous	[R].DELGIAPER.[F]		1	RecPY14His	RecPY14His	0	2	1	0	1	1	500.259	999.511	999.511	0.54	0.00027	HCD (High Energy Collision Dissociation)	MS2	8.268	52.332	27.4466	8528	PY14_273_109186_PY14-20_A725-20200724_3.raw	F2	2.46		1				366863616	27.34
		FALSE	High	Mascot (A5)	Unambiguous	[R].DELGIAPER.[F]		1	RecPY14His	RecPY14His	0	2	1	0	1	1	500.258	999.509	999.511	-1.23	-0.00061	HCD (High Energy Collision Dissociation)	MS2	14.5028	200	33.6421	10719	PY14_273_109186_PY14-20_A725-20200724_3.raw	F2		39	1	13	13	2.78612e-05
		FALSE	High	Sequest HT (A3)	Unambiguous	[R].DELGIAPER.[F]		1	RecPY14His	RecPY14His	0	2	1	0	1	1	500.259	999.51	999.511	-0.07	-3e-05	HCD (High Energy Collision Dissociation)	MS2	30.4292	198.934	53.2276	16017	PY14_273_109186_PY14-20_A725-20200724_3.raw	F2	2.31		1				53717080	52.99
		FALSE	High	Sequest HT (A3)	Unambiguous	[R].DELGIAPER.[F]		1	RecPY14His	RecPY14His	0	2	1	0	1	1	500.259	999.511	999.511	0.91	0.00046	HCD (High Energy Collision Dissociation)	MS2	30.0196	22.42	31.2078	9393	PY14_257_109481_P14_A725_20201216_1.raw	F1	2.51		1				374680000	31.13
		FALSE	High	Sequest HT (A3)	Unambiguous	[R].DELGIAPER.[F]		1	RecPY14His	RecPY14His	0	2	1	0	1	1	500.258	999.509	999.511	-1.1	-0.00055	HCD (High Energy Collision Dissociation)	MS2	24.8935	32.773	29.7023	8755	PY14_257_109481_P14_A725_20201216_1.raw	F1	2.76		1				96083304	29.71
		FALSE	High	Mascot (A5)	Unambiguous	[R].DELGIAPER.[F]		1	RecPY14His	RecPY14His	0	2	1	0	1	1	500.259	999.511	999.511	0.3	0.00015	HCD (High Energy Collision Dissociation)	MS2	1.16212	116.492	52.5724	16318	PY14_257_109481_P14_A725_20201216_1.raw	F1		41	1	13	13	1.56315e-05	226771872	51.73
		FALSE	Medium	Sequest HT (A3)	Unambiguous	[R].DELGIAPER.[F]		1	RecPY14His	RecPY14His	0	2	1	0	1	1	500.259	999.511	999.511	0.12	6e-05	HCD (High Energy Collision Dissociation)	MS2	0	200	65.6197	18631	PY14_273_109186_PY14-20_A725-20200724_3.raw	F2	1.2		1
		FALSE	High	Sequest HT (A3)	Unambiguous	[R].DELGIAPER.[F]		1	RecPY14His	RecPY14His	0	2	1	0	1	1	500.259	999.511	999.511	0.12	6e-05	HCD (High Energy Collision Dissociation)	MS2	0	200	65.871	18681	PY14_273_109186_PY14-20_A725-20200724_3.raw	F2	2.03		1
		FALSE	High	Sequest HT (A3)	Unambiguous	[R].DELGIAPER.[F]		1	RecPY14His	RecPY14His	0	2	1	0	1	1	500.258	999.508	999.511	-2.2	-0.0011	HCD (High Energy Collision Dissociation)	MS2	41.5939	104.788	24.452	7252	PY14_273_109186_PY14-20_A725-20200724_3.raw	F2	2.42		1				4809799680	22.54
		FALSE	High	Mascot (A5)	Unambiguous	[R].DELGIAPER.[F]		1	RecPY14His	RecPY14His	0	2	1	0	1	1	500.259	999.511	999.511	0.24	0.00012	HCD (High Energy Collision Dissociation)	MS2	0.737738	200	57.0733	17382	PY14_257_109481_P14_A725_20201216_1.raw	F1		40	1	13	13	2.16272e-05	5.70649e+06	56.98
		FALSE	High	Mascot (A5)	Unambiguous	[R].DELGIAPER.[F]		1	RecPY14His	RecPY14His	0	2	1	0	1	1	500.259	999.511	999.511	0.24	0.00012	HCD (High Energy Collision Dissociation)	MS2	0	200	57.5942	17498	PY14_257_109481_P14_A725_20201216_1.raw	F1		45	1	13	13	6.98232e-06	5070592	57.75
		FALSE	High	Sequest HT (A3)	Unambiguous	[R].DELGIAPER.[F]		1	RecPY14His	RecPY14His	0	2	1	0	1	1	500.259	999.511	999.511	0.67	0.00033	HCD (High Energy Collision Dissociation)	MS2	28.2524	108.123	31.4036	9951	PY14_273_109186_PY14-20_A725-20200724_3.raw	F2	2.28		1				108958312	31.43
		FALSE	High	Mascot (A5)	Unambiguous	[R].DELGIAPER.[F]		1	RecPY14His	RecPY14His	0	2	1	0	1	1	500.259	999.51	999.511	-0.43	-0.00022	HCD (High Energy Collision Dissociation)	MS2	27.2089	73.833	28.9211	9085	PY14_273_109186_PY14-20_A725-20200724_3.raw	F2		33	1	13	13	9.1622e-05	81425760	29.28
		FALSE	High	Mascot (A5)	Unambiguous	[R].DELGIAPER.[F]		1	RecPY14His	RecPY14His	0	2	1	0	1	1	500.259	999.511	999.511	0.24	0.00012	HCD (High Energy Collision Dissociation)	MS2	0.170453	0.03	21.7021	5183	PY14_257_109481_P14_A725_20201216_1.raw	F1		44	1	13	13	7.94328e-06	488286715904	21.57
		FALSE	High	Mascot (A5)	Unambiguous	[R].DELGIAPER.[F]		1	RecPY14His	RecPY14His	0	2	1	0	1	1	500.259	999.51	999.511	-0.25	-0.00012	HCD (High Energy Collision Dissociation)	MS2	11.7497	200	32.1108	10184	PY14_273_109186_PY14-20_A725-20200724_3.raw	F2		40	1	13	13	1.94984e-05	108958312	31.43
		FALSE	High	Mascot (A5)	Unambiguous	[R].DELGIAPER.[F]		1	RecPY14His	RecPY14His	0	2	1	0	1	1	500.259	999.51	999.511	-0.43	-0.00022	HCD (High Energy Collision Dissociation)	MS2	8.65019	30.403	51.7357	16093	PY14_257_109481_P14_A725_20201216_1.raw	F1		41	1	13	13	1.56315e-05	226771872	51.73
		FALSE	Medium	Sequest HT (A3)	Unambiguous	[R].DELGIAPER.[F]		1	RecPY14His	RecPY14His	0	2	1	0	1	1	500.259	999.511	999.511	0.12	6e-05	HCD (High Energy Collision Dissociation)	MS2	32.2966	200	46.4263	14368	PY14_273_109186_PY14-20_A725-20200724_3.raw	F2	1.66		1
		FALSE	High	Mascot (A5)	Unambiguous	[R].DELGIAPER.[F]		1	RecPY14His	RecPY14His	0	2	1	0	1	1	500.259	999.511	999.511	0.24	0.00012	HCD (High Energy Collision Dissociation)	MS2	1.27435	200	58.1132	17612	PY14_257_109481_P14_A725_20201216_1.raw	F1		43	1	13	13	1.10662e-05	1.55756e+06	58.12
		FALSE	High	Mascot (A5)	Unambiguous	[R].DELGIAPER.[F]		1	RecPY14His	RecPY14His	0	2	1	0	1	1	500.259	999.51	999.511	-0.43	-0.00022	HCD (High Energy Collision Dissociation)	MS2	0	132.208	38.5112	12330	PY14_257_109481_P14_A725_20201216_1.raw	F1		34	1	13	13	8.24138e-05	68533824	38.37
		FALSE	High	Mascot (A5)	Unambiguous	[R].DELGIAPER.[F]		1	RecPY14His	RecPY14His	0	2	1	0	1	1	500.259	999.51	999.511	-0.31	-0.00015	HCD (High Energy Collision Dissociation)	MS2	2.83293	200	64.5903	18431	PY14_273_109186_PY14-20_A725-20200724_3.raw	F2		27	1	13	13	0.000416869
		FALSE	High	Sequest HT (A3)	Unambiguous	[R].DELGIAPER.[F]		1	RecPY14His	RecPY14His	0	2	1	0	1	1	500.259	999.511	999.511	0.24	0.00012	HCD (High Energy Collision Dissociation)	MS2	7.62109	95.578	31.6937	10046	PY14_273_109186_PY14-20_A725-20200724_3.raw	F2	2.17		1				108958312	31.43
		FALSE	High	Mascot (A5)	Unambiguous	[R].DELGIAPER.[F]		1	RecPY14His	RecPY14His	0	2	1	0	1	1	500.259	999.51	999.511	-0.31	-0.00015	HCD (High Energy Collision Dissociation)	MS2	9.26497	141.066	33.0628	10519	PY14_273_109186_PY14-20_A725-20200724_3.raw	F2		39	1	13	13	2.39883e-05
		FALSE	High	Mascot (A5)	Unambiguous	[R].DELGIAPER.[F]		1	RecPY14His	RecPY14His	0	2	1	0	1	1	500.259	999.511	999.511	0.24	0.00012	HCD (High Energy Collision Dissociation)	MS2	0	200	57.3327	17441	PY14_257_109481_P14_A725_20201216_1.raw	F1		43	1	13	13	1.11686e-05	4.46769e+06	57.44
		FALSE	High	Mascot (A5)	Unambiguous	[R].DELGIAPER.[F]		1	RecPY14His	RecPY14His	0	2	1	0	1	1	500.259	999.51	999.511	-0.25	-0.00012	HCD (High Energy Collision Dissociation)	MS2	4.53605	1.204	19.7862	5331	PY14_273_109186_PY14-20_A725-20200724_3.raw	F2		43	1	13	13	1e-05	380120563712	18.77
		FALSE	High	Mascot (A5)	Unambiguous	[R].DELGIAPER.[F]		1	RecPY14His	RecPY14His	0	2	1	0	1	1	500.259	999.511	999.511	0.24	0.00012	HCD (High Energy Collision Dissociation)	MS2	0.712524	55.308	53.6669	16605	PY14_257_109481_P14_A725_20201216_1.raw	F1		43	1	13	13	1.09901e-05	290801728	53.78
		FALSE	High	Mascot (A5)	Unambiguous	[R].DELGIAPER.[F]		1	RecPY14His	RecPY14His	0	2	1	0	1	1	500.259	999.511	999.511	0.24	0.00012	HCD (High Energy Collision Dissociation)	MS2	1.2209	200	56.0357	17147	PY14_257_109481_P14_A725_20201216_1.raw	F1		45	1	13	13	6.98232e-06	8068414	56.02
		FALSE	High	Mascot (A5)	Unambiguous	[R].DELGIAPER.[F]		1	RecPY14His	RecPY14His	0	2	1	0	1	1	500.259	999.511	999.511	0.24	0.00012	HCD (High Energy Collision Dissociation)	MS2	1.51573	84.413	53.105	16456	PY14_257_109481_P14_A725_20201216_1.raw	F1		41	1	13	13	1.55239e-05	290801728	53.78
		FALSE	High	Mascot (A5)	Unambiguous	[R].DELGIAPER.[F]		1	RecPY14His	RecPY14His	0	2	1	0	1	1	500.259	999.511	999.511	0.24	0.00012	HCD (High Energy Collision Dissociation)	MS2	3.31328	7.72	25.3294	6750	PY14_257_109481_P14_A725_20201216_1.raw	F1		41	1	13	13	1.65196e-05	4709830144	24.43
		FALSE	High	Mascot (A5)	Unambiguous	[R].DELGIAPER.[F]		1	RecPY14His	RecPY14His	0	2	1	0	1	1	500.259	999.51	999.511	-0.19	-9e-05	HCD (High Energy Collision Dissociation)	MS2	20.1236	57.398	29.8844	9429	PY14_273_109186_PY14-20_A725-20200724_3.raw	F2		36	1	13	13	5.05825e-05
		FALSE	High	Mascot (A5)	Unambiguous	[R].DELGIAPER.[F]		1	RecPY14His	RecPY14His	0	2	1	0	1	1	500.259	999.51	999.511	-0.19	-9e-05	HCD (High Energy Collision Dissociation)	MS2	16.3978	200	43.8391	13697	PY14_273_109186_PY14-20_A725-20200724_3.raw	F2		34	1	13	13	7.32825e-05	81564488	43.27
		FALSE	High	Sequest HT (A3)	Unambiguous	[R].DELGIAPER.[F]		1	RecPY14His	RecPY14His	0	2	1	0	1	1	500.259	999.511	999.511	0.57	0.00029	HCD (High Energy Collision Dissociation)	MS2		126.409	45.3269	14083	PY14_273_109186_PY14-20_A725-20200724_3.raw	F2	1.9		1				28592424	45.22
		FALSE	High	Mascot (A5)	Unambiguous	[R].DELGIAPER.[F]		1	RecPY14His	RecPY14His	0	2	1	0	1	1	500.259	999.511	999.511	0.24	0.00012	HCD (High Energy Collision Dissociation)	MS2	8.13075	200	53.4921	16083	PY14_273_109186_PY14-20_A725-20200724_3.raw	F2		41	1	13	13	1.74181e-05	22610580	53.51
		FALSE	High	Sequest HT (A3)	Unambiguous	[R].DELGIAPER.[F]		1	RecPY14His	RecPY14His	0	2	1	0	1	1	500.259	999.51	999.511	-0.31	-0.00015	HCD (High Energy Collision Dissociation)	MS2	9.26497	141.066	33.0628	10519	PY14_273_109186_PY14-20_A725-20200724_3.raw	F2	2.25		1
		FALSE	High	Mascot (A5)	Unambiguous	[R].DELGIAPER.[F]		1	RecPY14His	RecPY14His	0	2	1	0	1	1	500.259	999.511	999.511	0.24	0.00012	HCD (High Energy Collision Dissociation)	MS2	0	200	69.7158	20021	PY14_257_109481_P14_A725_20201216_1.raw	F1		44	1	13	13	8.64968e-06	90578	69.94
		FALSE	High	Mascot (A5)	Unambiguous	[R].DELGIAPER.[F]		1	RecPY14His	RecPY14His	0	2	1	0	1	1	500.259	999.511	999.511	0.24	0.00012	HCD (High Energy Collision Dissociation)	MS2	0	200	66.1232	19292	PY14_257_109481_P14_A725_20201216_1.raw	F1		46	1	13	13	5.04661e-06	198558	65.92
		FALSE	Medium	Sequest HT (A3)	Unambiguous	[R].DELGIAPER.[F]		1	RecPY14His	RecPY14His	0	2	1	0	1	1	500.259	999.511	999.511	0.36	0.00018	HCD (High Energy Collision Dissociation)	MS2	23.96	175.467	46.1659	14302	PY14_273_109186_PY14-20_A725-20200724_3.raw	F2	1.76		1
		FALSE	High	Sequest HT (A3)	Unambiguous	[R].DELGIAPER.[F]		1	RecPY14His	RecPY14His	0	2	1	0	1	1	500.26	999.512	999.511	1.71	0.00085	HCD (High Energy Collision Dissociation)	MS2	18.1245	41.954	35.9021	11252	PY14_257_109481_P14_A725_20201216_1.raw	F1	2.23		1				186843280	35.69
		FALSE	High	Sequest HT (A3)	Unambiguous	[R].DELGIAPER.[F]		1	RecPY14His	RecPY14His	0	2	1	0	1	1	500.259	999.51	999.511	-0.25	-0.00012	HCD (High Energy Collision Dissociation)	MS2	25.4998	39.882	35.5781	11129	PY14_257_109481_P14_A725_20201216_1.raw	F1	2.58		1				186843280	35.69
		FALSE	High	Mascot (A5)	Unambiguous	[R].DELGIAPER.[F]		1	RecPY14His	RecPY14His	0	2	1	0	1	1	500.259	999.511	999.511	0.3	0.00015	HCD (High Energy Collision Dissociation)	MS2	0	200	63.0275	18655	PY14_257_109481_P14_A725_20201216_1.raw	F1		42	1	13	13	1.13763e-05	191244	62.67
		FALSE	High	Sequest HT (A3)	Unambiguous	[R].DELGIAPER.[F]		1	RecPY14His	RecPY14His	0	2	1	0	1	1	500.26	999.513	999.511	2.87	0.00143	HCD (High Energy Collision Dissociation)	MS2	41.4203	23.522	44.1032	14125	PY14_257_109481_P14_A725_20201216_1.raw	F1	2.21		1				67038072	44.05
		FALSE	High	Sequest HT (A3)	Unambiguous	[R].DELGIAPER.[F]		1	RecPY14His	RecPY14His	0	2	1	0	1	1	500.259	999.511	999.511	0.3	0.00015	HCD (High Energy Collision Dissociation)	MS2	1.24014	200	56.2946	17206	PY14_257_109481_P14_A725_20201216_1.raw	F1	2.39		1				7.05448e+06	56.36
		FALSE	High	Mascot (A5)	Unambiguous	[R].DELGIAPER.[F]		1	RecPY14His	RecPY14His	0	2	1	0	1	1	500.259	999.51	999.511	-0.43	-0.00022	HCD (High Energy Collision Dissociation)	MS2	0.404097	0.147	22.2459	5406	PY14_257_109481_P14_A725_20201216_1.raw	F1		41	1	13	13	1.55239e-05	488286715904	21.57
		FALSE	High	Sequest HT (A3)	Unambiguous	[R].DELGIAPER.[F]		1	RecPY14His	RecPY14His	0	2	1	0	1	1	500.258	999.51	999.511	-0.86	-0.00043	HCD (High Energy Collision Dissociation)	MS2	29.9253	66.574	31.0672	9841	PY14_273_109186_PY14-20_A725-20200724_3.raw	F2	2.33		1				108958312	31.43
		FALSE	High	Sequest HT (A3)	Unambiguous	[R].DELGIAPER.[F]		1	RecPY14His	RecPY14His	0	2	1	0	1	1	500.259	999.51	999.511	-0.68	-0.00034	HCD (High Energy Collision Dissociation)	MS2	11.9716	48.135	34.6183	10766	PY14_257_109481_P14_A725_20201216_1.raw	F1	2.67		1				126712584	34.61
		FALSE	High	Mascot (A5)	Unambiguous	[R].DELGIAPER.[F]		1	RecPY14His	RecPY14His	0	2	1	0	1	1	500.259	999.511	999.511	0.24	0.00012	HCD (High Energy Collision Dissociation)	MS2	1.24323	200	64.0635	18869	PY14_257_109481_P14_A725_20201216_1.raw	F1		44	1	13	13	7.76247e-06
		FALSE	High	Mascot (A5)	Unambiguous	[R].DELGIAPER.[F]		1	RecPY14His	RecPY14His	0	2	1	0	1	1	500.259	999.511	999.511	0.24	0.00012	HCD (High Energy Collision Dissociation)	MS2	1.03205	200	60.6861	18168	PY14_257_109481_P14_A725_20201216_1.raw	F1		41	1	13	13	1.57761e-05	587693	60.81
		FALSE	High	Sequest HT (A3)	Unambiguous	[R].DELGIAPER.[F]		1	RecPY14His	RecPY14His	0	2	1	0	1	1	500.258	999.508	999.511	-2.57	-0.00128	HCD (High Energy Collision Dissociation)	MS2	44.114	91.103	35.2158	10995	PY14_257_109481_P14_A725_20201216_1.raw	F1	2.47		1				98603808	35.33
		FALSE	High	Mascot (A5)	Unambiguous	[R].DELGIAPER.[F]		1	RecPY14His	RecPY14His	0	2	1	0	1	1	500.259	999.511	999.511	0.24	0.00012	HCD (High Energy Collision Dissociation)	MS2	0.748672	200	58.6285	17725	PY14_257_109481_P14_A725_20201216_1.raw	F1		44	1	13	13	7.62079e-06	1.52334e+06	58.63
		FALSE	High	Sequest HT (A3)	Unambiguous	[R].DELGIAPER.[F]		1	RecPY14His	RecPY14His	0	2	1	0	1	1	500.259	999.511	999.511	0.12	6e-05	HCD (High Energy Collision Dissociation)	MS2	0	200	57.3934	16974	PY14_273_109186_PY14-20_A725-20200724_3.raw	F2	1.96		1				440278	57.28
		FALSE	High	Sequest HT (A3)	Unambiguous	[R].DELGIAPER.[F]		1	RecPY14His	RecPY14His	0	2	1	0	1	1	500.259	999.511	999.511	0.12	6e-05	HCD (High Energy Collision Dissociation)	MS2	3.06713	200	57.1331	16919	PY14_273_109186_PY14-20_A725-20200724_3.raw	F2	2.29		1				608679	57.09
		FALSE	High	Sequest HT (A3)	Unambiguous	[R].DELGIAPER.[F]		1	RecPY14His	RecPY14His	0	2	1	0	1	1	500.259	999.511	999.511	0.12	6e-05	HCD (High Energy Collision Dissociation)	MS2	1.20898	200	56.877	16866	PY14_273_109186_PY14-20_A725-20200724_3.raw	F2	2		1				608679	57.09
		FALSE	High	Sequest HT (A3)	Unambiguous	[R].DELGIAPER.[F]		1	RecPY14His	RecPY14His	0	2	1	0	1	1	500.259	999.511	999.511	0.36	0.00018	HCD (High Energy Collision Dissociation)	MS2	3.49898	200	56.6141	16812	PY14_273_109186_PY14-20_A725-20200724_3.raw	F2	2.09		1				1.25591e+06	56.59
		FALSE	Medium	Sequest HT (A3)	Unambiguous	[R].DELGIAPER.[F]		1	RecPY14His	RecPY14His	0	2	1	0	1	1	500.259	999.511	999.511	0	0	HCD (High Energy Collision Dissociation)	MS2	1.12804	200	56.3617	16757	PY14_273_109186_PY14-20_A725-20200724_3.raw	F2	1.46		1
		FALSE	High	Sequest HT (A3)	Unambiguous	[R].DELGIAPER.[F]		1	RecPY14His	RecPY14His	0	2	1	0	1	1	500.259	999.511	999.511	0.18	9e-05	HCD (High Energy Collision Dissociation)	MS2	2.44497	200	56.1093	16703	PY14_273_109186_PY14-20_A725-20200724_3.raw	F2	2.27		1				3.18047e+06	56.01
		FALSE	High	Sequest HT (A3)	Unambiguous	[R].DELGIAPER.[F]		1	RecPY14His	RecPY14His	0	2	1	0	1	1	500.259	999.51	999.511	-0.25	-0.00012	HCD (High Energy Collision Dissociation)	MS2	23.0641	107.2	26.3615	8093	PY14_273_109186_PY14-20_A725-20200724_3.raw	F2	2.49		1				269183680	26.53
		FALSE	High	Sequest HT (A3)	Unambiguous	[R].DELGIAPER.[F]		1	RecPY14His	RecPY14His	0	2	1	0	1	1	500.257	999.507	999.511	-3.85	-0.00192	HCD (High Energy Collision Dissociation)	MS2	11.0384	30.798	29.1526	8519	PY14_257_109481_P14_A725_20201216_1.raw	F1	2.88		1				256720320	29.27
		FALSE	High	Mascot (A5)	Unambiguous	[R].DELGIAPER.[F]		1	RecPY14His	RecPY14His	0	2	1	0	1	1	500.259	999.511	999.511	0.3	0.00015	HCD (High Energy Collision Dissociation)	MS2	0.935392	200	59.9112	18002	PY14_257_109481_P14_A725_20201216_1.raw	F1		45	1	13	13	7.04693e-06	1.58955e+06	59.67
		FALSE	High	Sequest HT (A3)	Unambiguous	[R].DELGIAPER.[F]		1	RecPY14His	RecPY14His	0	2	1	0	1	1	500.259	999.511	999.511	0.24	0.00012	HCD (High Energy Collision Dissociation)	MS2	1.27435	200	58.1132	17612	PY14_257_109481_P14_A725_20201216_1.raw	F1	2.57		1				1.55756e+06	58.12
		FALSE	Medium	Sequest HT (A3)	Unambiguous	[R].DELGIAPER.[F]		1	RecPY14His	RecPY14His	0	2	1	0	1	1	500.259	999.511	999.511	0.06	3e-05	HCD (High Energy Collision Dissociation)	MS2	10.1358	200	60.477	17601	PY14_273_109186_PY14-20_A725-20200724_3.raw	F2	1.88		1
		FALSE	Medium	Sequest HT (A3)	Unambiguous	[R].DELGIAPER.[F]		1	RecPY14His	RecPY14His	0	2	1	0	1	1	500.259	999.51	999.511	-0.13	-6e-05	HCD (High Energy Collision Dissociation)	MS2	6.44359	200	60.7277	17650	PY14_273_109186_PY14-20_A725-20200724_3.raw	F2	1.49		1
		FALSE	Medium	Sequest HT (A3)	Unambiguous	[R].DELGIAPER.[F]		1	RecPY14His	RecPY14His	0	2	1	0	1	1	500.259	999.511	999.511	0	0	HCD (High Energy Collision Dissociation)	MS2	2.42583	200	60.9824	17704	PY14_273_109186_PY14-20_A725-20200724_3.raw	F2	1.66		1
		FALSE	Medium	Sequest HT (A3)	Unambiguous	[R].DELGIAPER.[F]		1	RecPY14His	RecPY14His	0	2	1	0	1	1	500.259	999.51	999.511	-0.07	-3e-05	HCD (High Energy Collision Dissociation)	MS2	0	200	66.6495	18837	PY14_273_109186_PY14-20_A725-20200724_3.raw	F2	1.6		1
		FALSE	High	Sequest HT (A3)	Unambiguous	[R].DELGIAPER.[F]		1	RecPY14His	RecPY14His	0	2	1	0	1	1	500.259	999.511	999.511	0.24	0.00012	HCD (High Energy Collision Dissociation)	MS2	0	200	66.3914	18787	PY14_273_109186_PY14-20_A725-20200724_3.raw	F2	1.92		1				373438	66.35
		FALSE	Medium	Sequest HT (A3)	Unambiguous	[R].DELGIAPER.[F]		1	RecPY14His	RecPY14His	0	2	1	0	1	1	500.259	999.511	999.511	0.12	6e-05	HCD (High Energy Collision Dissociation)	MS2	0	200	66.1317	18734	PY14_273_109186_PY14-20_A725-20200724_3.raw	F2	1.69		1
		FALSE	High	Sequest HT (A3)	Unambiguous	[R].DELGIAPER.[F]		1	RecPY14His	RecPY14His	0	2	1	0	1	1	500.259	999.511	999.511	0.42	0.00021	HCD (High Energy Collision Dissociation)	MS2	6.45082	200	55.5937	16588	PY14_273_109186_PY14-20_A725-20200724_3.raw	F2	2.24		1				5.76451e+06	55.47
		FALSE	High	Mascot (A5)	Unambiguous	[R].DELGIAPER.[F]		1	RecPY14His	RecPY14His	0	2	1	0	1	1	500.259	999.511	999.511	0.24	0.00012	HCD (High Energy Collision Dissociation)	MS2	0	200	62.2527	18494	PY14_257_109481_P14_A725_20201216_1.raw	F1		42	1	13	13	1.14288e-05	232160	62.18
		FALSE	High	Sequest HT (A3)	Unambiguous	[R].DELGIAPER.[F]		1	RecPY14His	RecPY14His	0	2	1	0	1	1	500.259	999.51	999.511	-0.68	-0.00034	HCD (High Energy Collision Dissociation)	MS2	31.0533	38.264	26.0435	7960	PY14_273_109186_PY14-20_A725-20200724_3.raw	F2	2.27		1				269183680	26.53
		FALSE	Medium	Sequest HT (A3)	Unambiguous	[R].DELGIAPER.[F]		1	RecPY14His	RecPY14His	0	2	1	0	1	1	500.259	999.511	999.511	0.12	6e-05	HCD (High Energy Collision Dissociation)	MS2	5.59347	200	57.9012	17078	PY14_273_109186_PY14-20_A725-20200724_3.raw	F2	1.73		1
		FALSE	High	Sequest HT (A3)	Unambiguous	[R].DELGIAPER.[F]		1	RecPY14His	RecPY14His	0	2	1	0	1	1	500.258	999.508	999.511	-2.26	-0.00113	HCD (High Energy Collision Dissociation)	MS2	15.3166	187.636	34.9228	10889	PY14_257_109481_P14_A725_20201216_1.raw	F1	2.8		1				48718744	34.92
		FALSE	High	Mascot (A5)	Unambiguous	[R].DELGIAPER.[F]		1	RecPY14His	RecPY14His	0	2	1	0	1	1	500.258	999.509	999.511	-1.23	-0.00061	HCD (High Energy Collision Dissociation)	MS2	0	23.018	29.4215	8629	PY14_257_109481_P14_A725_20201216_1.raw	F1		39	1	13	13	2.37137e-05	256720320	29.27
		FALSE	High	Mascot (A5)	Unambiguous	[R].DELGIAPER.[F]		1	RecPY14His	RecPY14His	0	2	1	0	1	1	500.259	999.511	999.511	0.3	0.00015	HCD (High Energy Collision Dissociation)	MS2	1.21185	200	65.0941	19080	PY14_257_109481_P14_A725_20201216_1.raw	F1		48	1	13	13	3.06196e-06	359795	65.09
		FALSE	High	Sequest HT (A3)	Unambiguous	[R].DELGIAPER.[F]		1	RecPY14His	RecPY14His	0	2	1	0	1	1	500.259	999.511	999.511	0.06	3e-05	HCD (High Energy Collision Dissociation)	MS2	3.12354	200	52.7101	15875	PY14_273_109186_PY14-20_A725-20200724_3.raw	F2	2.01		1				53717080	52.99
		FALSE	Medium	Sequest HT (A3)	Unambiguous	[R].DELGIAPER.[F]		1	RecPY14His	RecPY14His	0	2	1	0	1	1	500.259	999.51	999.511	-0.13	-6e-05	HCD (High Energy Collision Dissociation)	MS2	0	200	60.22	17549	PY14_273_109186_PY14-20_A725-20200724_3.raw	F2	1.58		1
		FALSE	High	Sequest HT (A3)	Unambiguous	[R].DELGIAPER.[F]		1	RecPY14His	RecPY14His	0	2	1	0	1	1	500.258	999.508	999.511	-2.14	-0.00107	HCD (High Energy Collision Dissociation)	MS2	56.8721	95.563	25.5059	7727	PY14_273_109186_PY14-20_A725-20200724_3.raw	F2	2.42		1				197063696	25.84
		FALSE	High	Sequest HT (A3)	Unambiguous	[R].DELGIAPER.[F]		1	RecPY14His	RecPY14His	0	2	1	0	1	1	500.259	999.511	999.511	0.12	6e-05	HCD (High Energy Collision Dissociation)	MS2	3.2363	200	59.9635	17497	PY14_273_109186_PY14-20_A725-20200724_3.raw	F2	2.04		1				359127	59.98
		FALSE	High	Sequest HT (A3)	Unambiguous	[R].DELGIAPER.[F]		1	RecPY14His	RecPY14His	0	2	1	0	1	1	500.259	999.511	999.511	0.06	3e-05	HCD (High Energy Collision Dissociation)	MS2	0	200	57.6468	17026	PY14_273_109186_PY14-20_A725-20200724_3.raw	F2	2.12		1				216466	57.98
		FALSE	Medium	Sequest HT (A3)	Unambiguous	[R].DELGIAPER.[F]		1	RecPY14His	RecPY14His	0	2	1	0	1	1	500.259	999.511	999.511	0.12	6e-05	HCD (High Energy Collision Dissociation)	MS2	0	200	59.7064	17446	PY14_273_109186_PY14-20_A725-20200724_3.raw	F2	1.6		1
		FALSE	Medium	Sequest HT (A3)	Unambiguous	[R].DELGIAPER.[F]		1	RecPY14His	RecPY14His	0	2	1	0	1	1	500.259	999.511	999.511	0.12	6e-05	HCD (High Energy Collision Dissociation)	MS2	4.86149	200	59.1955	17341	PY14_273_109186_PY14-20_A725-20200724_3.raw	F2	1.76		1
		FALSE	Medium	Sequest HT (A3)	Unambiguous	[R].DELGIAPER.[F]		1	RecPY14His	RecPY14His	0	2	1	0	1	1	500.259	999.511	999.511	0.12	6e-05	HCD (High Energy Collision Dissociation)	MS2	9.76668	200	58.9352	17289	PY14_273_109186_PY14-20_A725-20200724_3.raw	F2	1.56		1
		FALSE	High	Sequest HT (A3)	Unambiguous	[R].DELGIAPER.[F]		1	RecPY14His	RecPY14His	0	2	1	0	1	1	500.259	999.51	999.511	-0.8	-0.0004	HCD (High Energy Collision Dissociation)	MS2	13.9857	45.364	25.7726	7847	PY14_273_109186_PY14-20_A725-20200724_3.raw	F2	2.36		1				197063696	25.84
		FALSE	Medium	Sequest HT (A3)	Unambiguous	[R].DELGIAPER.[F]		1	RecPY14His	RecPY14His	0	2	1	0	1	1	500.259	999.511	999.511	0	0	HCD (High Energy Collision Dissociation)	MS2	5.20399	200	58.6712	17235	PY14_273_109186_PY14-20_A725-20200724_3.raw	F2	1.69		1
		FALSE	High	Sequest HT (A3)	Unambiguous	[R].DELGIAPER.[F]		1	RecPY14His	RecPY14His	0	2	1	0	1	1	500.259	999.511	999.511	0.18	9e-05	HCD (High Energy Collision Dissociation)	MS2	0.741847	54.299	53.3845	16529	PY14_257_109481_P14_A725_20201216_1.raw	F1	2.41		1				290801728	53.78
		FALSE	High	Sequest HT (A3)	Unambiguous	[R].DELGIAPER.[F]		1	RecPY14His	RecPY14His	0	2	1	0	1	1	500.259	999.511	999.511	0.06	3e-05	HCD (High Energy Collision Dissociation)	MS2	3.75413	200	58.4141	17182	PY14_273_109186_PY14-20_A725-20200724_3.raw	F2	2.3		1				258327	58.44
		FALSE	Medium	Sequest HT (A3)	Unambiguous	[R].DELGIAPER.[F]		1	RecPY14His	RecPY14His	0	2	1	0	1	1	500.259	999.511	999.511	0.18	9e-05	HCD (High Energy Collision Dissociation)	MS2	1.66338	200	58.1578	17130	PY14_273_109186_PY14-20_A725-20200724_3.raw	F2	1.69		1
		FALSE	Medium	Sequest HT (A3)	Unambiguous	[R].DELGIAPER.[F]		1	RecPY14His	RecPY14His	0	2	1	0	1	1	500.259	999.511	999.511	0.3	0.00015	HCD (High Energy Collision Dissociation)	MS2	0	200	59.4547	17393	PY14_273_109186_PY14-20_A725-20200724_3.raw	F2	1.8		1
		FALSE	High	Sequest HT (A3)	Unambiguous	[R].DELGIAPER.[F]		1	RecPY14His	RecPY14His	0	2	1	0	1	1	500.26	999.513	999.511	2.8	0.0014	HCD (High Energy Collision Dissociation)	MS2	13.8864	93.59	31.7653	9618	PY14_257_109481_P14_A725_20201216_1.raw	F1	2.63		1				374680000	31.13
		FALSE	High	Sequest HT (A3)	Unambiguous	[R].DELGIAPER.[F]		1	RecPY14His	RecPY14His	0	2	1	0	1	1	500.259	999.51	999.511	-0.43	-0.00022	HCD (High Energy Collision Dissociation)	MS2	8.65019	30.403	51.7357	16093	PY14_257_109481_P14_A725_20201216_1.raw	F1	2.36		1				226771872	51.73
		FALSE	High	Sequest HT (A3)	Unambiguous	[R].DELGIAPER.[F]		1	RecPY14His	RecPY14His	0	2	1	0	1	1	500.259	999.51	999.511	-0.8	-0.0004	HCD (High Energy Collision Dissociation)	MS2	4.2668	4.759	24.5246	6419	PY14_257_109481_P14_A725_20201216_1.raw	F1	2.37		1				4709830144	24.43
		FALSE	High	Mascot (A5)	Unambiguous	[R].DELGIAPER.[F]		1	RecPY14His	RecPY14His	0	2	1	0	1	1	500.259	999.51	999.511	-0.07	-3e-05	HCD (High Energy Collision Dissociation)	MS2	30.4292	198.934	53.2276	16017	PY14_273_109186_PY14-20_A725-20200724_3.raw	F2		36	1	13	13	5.29663e-05	53717080	52.99
		FALSE	High	Mascot (A5)	Unambiguous	[R].DELGIAPER.[F]		1	RecPY14His	RecPY14His	0	2	1	0	1	1	500.259	999.511	999.511	0.12	6e-05	HCD (High Energy Collision Dissociation)	MS2	23.1634	166.979	39.2468	12469	PY14_273_109186_PY14-20_A725-20200724_3.raw	F2		38	1	13	13	3.28852e-05	65286876	39.83
		FALSE	High	Mascot (A5)	Unambiguous	[R].DELGIAPER.[F]		1	RecPY14His	RecPY14His	0	2	1	0	1	1	500.259	999.51	999.511	-0.07	-3e-05	HCD (High Energy Collision Dissociation)	MS2	1.20505	200	52.4512	15814	PY14_273_109186_PY14-20_A725-20200724_3.raw	F2		47	1	13	13	3.55631e-06	22788818	51.97
		FALSE	High	Mascot (A5)	Unambiguous	[R].DELGIAPER.[F]		1	RecPY14His	RecPY14His	0	2	1	0	1	1	500.259	999.51	999.511	-0.07	-3e-05	HCD (High Energy Collision Dissociation)	MS2	2.02595	200	63.5647	18225	PY14_273_109186_PY14-20_A725-20200724_3.raw	F2		36	1	13	13	4.73151e-05
		FALSE	High	Mascot (A5)	Unambiguous	[R].DELGIAPER.[F]		1	RecPY14His	RecPY14His	0	2	1	0	1	1	500.259	999.511	999.511	0.12	6e-05	HCD (High Energy Collision Dissociation)	MS2	0	200	65.6197	18631	PY14_273_109186_PY14-20_A725-20200724_3.raw	F2		34	1	13	13	7.53356e-05
		FALSE	High	Mascot (A5)	Unambiguous	[R].DELGIAPER.[F]		1	RecPY14His	RecPY14His	0	2	1	0	1	1	500.259	999.511	999.511	0.12	6e-05	HCD (High Energy Collision Dissociation)	MS2	0	200	66.1317	18734	PY14_273_109186_PY14-20_A725-20200724_3.raw	F2		40	1	13	13	2.0893e-05	373438	66.35
		FALSE	High	Sequest HT (A3)	Unambiguous	[R].DELGIAPER.[F]		1	RecPY14His	RecPY14His	0	2	1	0	1	1	500.26	999.512	999.511	1.83	0.00091	HCD (High Energy Collision Dissociation)	MS2	29.6969	162.72	37.7054	12018	PY14_257_109481_P14_A725_20201216_1.raw	F1	2.75		1				81282648	37.63
		FALSE	High	Mascot (A5)	Unambiguous	[R].DELGIAPER.[F]		1	RecPY14His	RecPY14His	0	2	1	0	1	1	500.259	999.51	999.511	-0.07	-3e-05	HCD (High Energy Collision Dissociation)	MS2	0	200	66.6495	18837	PY14_273_109186_PY14-20_A725-20200724_3.raw	F2		30	1	13	13	0.000193642	373438	66.35
		FALSE	High	Sequest HT (A3)	Unambiguous	[R].DELGIAPER.[F]		1	RecPY14His	RecPY14His	0	2	1	0	1	1	500.259	999.511	999.511	0.3	0.00015	HCD (High Energy Collision Dissociation)	MS2	10.1766	153.984	38.9669	12395	PY14_273_109186_PY14-20_A725-20200724_3.raw	F2	2.26		1				51785052	38.49
		FALSE	High	Sequest HT (A3)	Unambiguous	[R].DELGIAPER.[F]		1	RecPY14His	RecPY14His	0	2	1	0	1	1	500.259	999.511	999.511	0.61	0.0003	HCD (High Energy Collision Dissociation)	MS2	14.3926	161.294	40.3909	12777	PY14_273_109186_PY14-20_A725-20200724_3.raw	F2	2.12		1				115922720	40.67
		FALSE	High	Sequest HT (A3)	Unambiguous	[R].DELGIAPER.[F]		1	RecPY14His	RecPY14His	0	2	1	0	1	1	500.259	999.511	999.511	0.54	0.00027	HCD (High Energy Collision Dissociation)	MS2	10.1965	200	55.7762	17089	PY14_257_109481_P14_A725_20201216_1.raw	F1	2.49		1				3.68833e+06	55.73
		FALSE	High	Sequest HT (A3)	Unambiguous	[R].DELGIAPER.[F]		1	RecPY14His	RecPY14His	0	2	1	0	1	1	500.259	999.511	999.511	0.12	6e-05	HCD (High Energy Collision Dissociation)	MS2	5.09663	165.126	34.5307	11018	PY14_273_109186_PY14-20_A725-20200724_3.raw	F2	2.33		1
		FALSE	High	Mascot (A5)	Unambiguous	[R].DELGIAPER.[F]		1	RecPY14His	RecPY14His	0	2	1	0	1	1	500.259	999.511	999.511	0.24	0.00012	HCD (High Energy Collision Dissociation)	MS2	0	200	66.3914	18787	PY14_273_109186_PY14-20_A725-20200724_3.raw	F2		43	1	13	13	9.37562e-06	373438	66.35
		FALSE	High	Sequest HT (A3)	Unambiguous	[R].DELGIAPER.[F]		1	RecPY14His	RecPY14His	0	2	1	0	1	1	500.259	999.51	999.511	-0.19	-9e-05	HCD (High Energy Collision Dissociation)	MS2	16.3978	200	43.8391	13697	PY14_273_109186_PY14-20_A725-20200724_3.raw	F2	2.46		1				81564488	43.27
		FALSE	High	Mascot (A5)	Unambiguous	[R].DELGIAPER.[F]		1	RecPY14His	RecPY14His	0	2	1	0	1	1	500.259	999.511	999.511	0.12	6e-05	HCD (High Energy Collision Dissociation)	MS2	30.0804	35.782	28.3585	8881	PY14_273_109186_PY14-20_A725-20200724_3.raw	F2		35	1	13	13	6.47143e-05	366863616	27.34
		FALSE	High	Mascot (A5)	Unambiguous	[R].DELGIAPER.[F]		1	RecPY14His	RecPY14His	0	2	1	0	1	1	500.259	999.511	999.511	0.12	6e-05	HCD (High Energy Collision Dissociation)	MS2	4.86149	200	59.1955	17341	PY14_273_109186_PY14-20_A725-20200724_3.raw	F2		51	1	13	13	1.57398e-06	390812	59.28
		FALSE	Medium	Sequest HT (A3)	Unambiguous	[R].DELGIAPER.[F]		1	RecPY14His	RecPY14His	0	2	1	0	1	1	500.259	999.511	999.511	0.36	0.00018	HCD (High Energy Collision Dissociation)	MS2	17.8464	187.295	43.5469	13621	PY14_273_109186_PY14-20_A725-20200724_3.raw	F2	1.84		1
		FALSE	High	Sequest HT (A3)	Unambiguous	[R].DELGIAPER.[F]		1	RecPY14His	RecPY14His	0	2	1	0	1	1	500.261	999.514	999.511	3.29	0.00165	HCD (High Energy Collision Dissociation)	MS2	26.3674	63.748	41.96	13466	PY14_257_109481_P14_A725_20201216_1.raw	F1	2.65		1				98171832	41.8
		FALSE	High	Mascot (A5)	Unambiguous	[R].DELGIAPER.[F]		1	RecPY14His	RecPY14His	0	2	1	0	1	1	500.259	999.511	999.511	0.24	0.00012	HCD (High Energy Collision Dissociation)	MS2	0	200	68.7025	19241	PY14_273_109186_PY14-20_A725-20200724_3.raw	F2		32	1	13	13	0.000114551	194186	68.74
		FALSE	High	Mascot (A5)	Unambiguous	[R].DELGIAPER.[F]		1	RecPY14His	RecPY14His	0	2	1	0	1	1	500.259	999.511	999.511	0.18	9e-05	HCD (High Energy Collision Dissociation)	MS2	1.90149	200	62.2808	17967	PY14_273_109186_PY14-20_A725-20200724_3.raw	F2		40	1	13	13	2.1677e-05	300063	62.24
		FALSE	High	Sequest HT (A3)	Unambiguous	[R].DELGIAPER.[F]		1	RecPY14His	RecPY14His	0	2	1	0	1	1	500.259	999.511	999.511	0.12	6e-05	HCD (High Energy Collision Dissociation)	MS2	0.728543	108.063	54.2079	16749	PY14_257_109481_P14_A725_20201216_1.raw	F1	2.28		1				290801728	53.78
		FALSE	High	Sequest HT (A3)	Unambiguous	[R].DELGIAPER.[F]		1	RecPY14His	RecPY14His	0	2	1	0	1	1	500.259	999.512	999.511	1.09	0.00055	HCD (High Energy Collision Dissociation)	MS2	0	155.741	36.6168	11726	PY14_273_109186_PY14-20_A725-20200724_3.raw	F2	2.35		1				56853908	36.76
		FALSE	High	Mascot (A5)	Unambiguous	[R].DELGIAPER.[F]		1	RecPY14His	RecPY14His	0	2	1	0	1	1	500.259	999.511	999.511	0.06	3e-05	HCD (High Energy Collision Dissociation)	MS2	2.01089	200	62.792	18071	PY14_273_109186_PY14-20_A725-20200724_3.raw	F2		31	1	13	13	0.00014388
		FALSE	High	Mascot (A5)	Unambiguous	[R].DELGIAPER.[F]		1	RecPY14His	RecPY14His	0	2	1	0	1	1	500.259	999.511	999.511	0.18	9e-05	HCD (High Energy Collision Dissociation)	MS2	1.45163	200	54.5583	16341	PY14_273_109186_PY14-20_A725-20200724_3.raw	F2		39	1	13	13	2.39883e-05	7.87546e+06	54.46
		FALSE	High	Mascot (A5)	Unambiguous	[R].DELGIAPER.[F]		1	RecPY14His	RecPY14His	0	2	1	0	1	1	500.259	999.511	999.511	0.06	3e-05	HCD (High Energy Collision Dissociation)	MS2	2.27108	2.434	22.5847	6499	PY14_273_109186_PY14-20_A725-20200724_3.raw	F2		45	1	13	13	6.38263e-06	4809799680	22.54
		FALSE	High	Mascot (A5)	Unambiguous	[R].DELGIAPER.[F]		1	RecPY14His	RecPY14His	0	2	1	0	1	1	500.259	999.511	999.511	0.06	3e-05	HCD (High Energy Collision Dissociation)	MS2	3.12354	200	52.7101	15875	PY14_273_109186_PY14-20_A725-20200724_3.raw	F2		49	1	13	13	2.48313e-06	53717080	52.99
		FALSE	High	Mascot (A5)	Unambiguous	[R].DELGIAPER.[F]		1	RecPY14His	RecPY14His	0	2	1	0	1	1	500.259	999.511	999.511	0.12	6e-05	HCD (High Energy Collision Dissociation)	MS2	0	200	61.4667	18332	PY14_257_109481_P14_A725_20201216_1.raw	F1		44	1	13	13	7.53356e-06	478316	61.91
		FALSE	High	Sequest HT (A3)	Unambiguous	[R].DELGIAPER.[F]		1	RecPY14His	RecPY14His	0	2	1	0	1	1	500.26	999.513	999.511	2.19	0.0011	HCD (High Energy Collision Dissociation)	MS2	38.8396	50.561	43.2286	13852	PY14_257_109481_P14_A725_20201216_1.raw	F1	2.45		1				53118608	42.96
		FALSE	High	Sequest HT (A3)	Unambiguous	[R].DELGIAPER.[F]		1	RecPY14His	RecPY14His	0	2	1	0	1	1	500.259	999.511	999.511	0.61	0.0003	HCD (High Energy Collision Dissociation)	MS2	16.9409	182.366	39.1402	12555	PY14_257_109481_P14_A725_20201216_1.raw	F1	2.78		1				94004008	39
		FALSE	High	Mascot (A5)	Unambiguous	[R].DELGIAPER.[F]		1	RecPY14His	RecPY14His	0	2	1	0	1	1	500.259	999.511	999.511	0.18	9e-05	HCD (High Energy Collision Dissociation)	MS2	1.32067	200	54.2881	16276	PY14_273_109186_PY14-20_A725-20200724_3.raw	F2		43	1	13	13	1.09396e-05	11384201	54.21
		FALSE	High	Mascot (A5)	Unambiguous	[R].DELGIAPER.[F]		1	RecPY14His	RecPY14His	0	2	1	0	1	1	500.259	999.511	999.511	0.06	3e-05	HCD (High Energy Collision Dissociation)	MS2	0	200	61.7523	17860	PY14_273_109186_PY14-20_A725-20200724_3.raw	F2		31	1	13	13	0.000169824	216922	61.38
		FALSE	High	Mascot (A5)	Unambiguous	[R].DELGIAPER.[F]		1	RecPY14His	RecPY14His	0	2	1	0	1	1	500.259	999.511	999.511	0.06	3e-05	HCD (High Energy Collision Dissociation)	MS2	2.41733	200	55.8553	16647	PY14_273_109186_PY14-20_A725-20200724_3.raw	F2		41	1	13	13	1.47911e-05	2749214	55.78
		FALSE	High	Mascot (A5)	Unambiguous	[R].DELGIAPER.[F]		1	RecPY14His	RecPY14His	0	2	1	0	1	1	500.259	999.51	999.511	-0.13	-6e-05	HCD (High Energy Collision Dissociation)	MS2	17.395	185.519	51.9288	15680	PY14_273_109186_PY14-20_A725-20200724_3.raw	F2		33	1	13	13	0.000110662	22788818	51.97
		FALSE	High	Mascot (A5)	Unambiguous	[R].DELGIAPER.[F]		1	RecPY14His	RecPY14His	0	2	1	0	1	1	500.259	999.511	999.511	0.12	6e-05	HCD (High Energy Collision Dissociation)	MS2	0.728543	108.063	54.2079	16749	PY14_257_109481_P14_A725_20201216_1.raw	F1		41	1	13	13	1.55597e-05	290801728	53.78
		FALSE	High	Mascot (A5)	Unambiguous	[R].DELGIAPER.[F]		1	RecPY14His	RecPY14His	0	2	1	0	1	1	500.259	999.511	999.511	0.06	3e-05	HCD (High Energy Collision Dissociation)	MS2	0.0438138	0.03	21.6944	5180	PY14_257_109481_P14_A725_20201216_1.raw	F1		39	1	13	13	2.41546e-05	488286715904	21.57
		FALSE	High	Mascot (A5)	Unambiguous	[R].DELGIAPER.[F]		1	RecPY14His	RecPY14His	0	2	1	0	1	1	500.259	999.511	999.511	0.18	9e-05	HCD (High Energy Collision Dissociation)	MS2	2.37388	200	61.2377	17756	PY14_273_109186_PY14-20_A725-20200724_3.raw	F2		29	1	13	13	0.000246037	285723	60.85
		FALSE	High	Sequest HT (A3)	Unambiguous	[R].DELGIAPER.[F]		1	RecPY14His	RecPY14His	0	2	1	0	1	1	500.259	999.511	999.511	0.54	0.00027	HCD (High Energy Collision Dissociation)	MS2	17.837	189.488	42.1152	13239	PY14_273_109186_PY14-20_A725-20200724_3.raw	F2	2.09		1				33751296	42.32
		FALSE	High	Sequest HT (A3)	Unambiguous	[R].DELGIAPER.[F]		1	RecPY14His	RecPY14His	0	2	1	0	1	1	500.26	999.513	999.511	2.13	0.00107	HCD (High Energy Collision Dissociation)	MS2	36.2488	58.946	43.8409	14041	PY14_257_109481_P14_A725_20201216_1.raw	F1	2.21		1				67038072	44.05
		FALSE	High	Mascot (A5)	Unambiguous	[R].DELGIAPER.[F]		1	RecPY14His	RecPY14His	0	2	1	0	1	1	500.259	999.51	999.511	-0.07	-3e-05	HCD (High Energy Collision Dissociation)	MS2	2.75279	200	64.3256	18377	PY14_273_109186_PY14-20_A725-20200724_3.raw	F2		49	1	13	13	2.48886e-06	431909	63.99
		FALSE	High	Mascot (A5)	Unambiguous	[R].DELGIAPER.[F]		1	RecPY14His	RecPY14His	0	2	1	0	1	1	500.259	999.511	999.511	0.12	6e-05	HCD (High Energy Collision Dissociation)	MS2	2.1058	200	57.852	17555	PY14_257_109481_P14_A725_20201216_1.raw	F1		43	1	13	13	1.10662e-05	5070592	57.75
		FALSE	High	Mascot (A5)	Unambiguous	[R].DELGIAPER.[F]		1	RecPY14His	RecPY14His	0	2	1	0	1	1	500.259	999.511	999.511	0.06	3e-05	HCD (High Energy Collision Dissociation)	MS2	0	186.947	54.4671	16808	PY14_257_109481_P14_A725_20201216_1.raw	F1		41	1	13	13	1.42233e-05	8.37182e+06	54.41
		FALSE	High	Sequest HT (A3)	Unambiguous	[R].DELGIAPER.[F]		1	RecPY14His	RecPY14His	0	2	1	0	1	1	500.259	999.511	999.511	0.06	3e-05	HCD (High Energy Collision Dissociation)	MS2	0	154.117	54.7229	16868	PY14_257_109481_P14_A725_20201216_1.raw	F1	2.75		1				20436148	54.66
		FALSE	High	Sequest HT (A3)	Unambiguous	[R].DELGIAPER.[F]		1	RecPY14His	RecPY14His	0	2	1	0	1	1	500.259	999.511	999.511	0.42	0.00021	HCD (High Energy Collision Dissociation)	MS2	11.6243	162.746	43.2577	13544	PY14_273_109186_PY14-20_A725-20200724_3.raw	F2	2.22		1				81564488	43.27
		FALSE	High	Mascot (A5)	Unambiguous	[R].DELGIAPER.[F]		1	RecPY14His	RecPY14His	0	2	1	0	1	1	500.259	999.511	999.511	0.18	9e-05	HCD (High Energy Collision Dissociation)	MS2	0.741847	54.299	53.3845	16529	PY14_257_109481_P14_A725_20201216_1.raw	F1		45	1	13	13	6.98232e-06	290801728	53.78
		FALSE	High	Sequest HT (A3)	Unambiguous	[R].DELGIAPER.[F]		1	RecPY14His	RecPY14His	0	2	1	0	1	1	500.259	999.51	999.511	-0.25	-0.00012	HCD (High Energy Collision Dissociation)	MS2	0	165.541	38.2184	12219	PY14_257_109481_P14_A725_20201216_1.raw	F1	2.84		1				68533824	38.37
		FALSE	High	Mascot (A5)	Unambiguous	[R].DELGIAPER.[F]		1	RecPY14His	RecPY14His	0	2	1	0	1	1	500.259	999.511	999.511	0.12	6e-05	HCD (High Energy Collision Dissociation)	MS2	1.20898	200	56.877	16866	PY14_273_109186_PY14-20_A725-20200724_3.raw	F2		52	1	13	13	1.25026e-06	608679	57.09
		FALSE	High	Sequest HT (A3)	Unambiguous	[R].DELGIAPER.[F]		1	RecPY14His	RecPY14His	0	2	1	0	1	1	500.259	999.511	999.511	0.67	0.00033	HCD (High Energy Collision Dissociation)	MS2	9.44969	168.069	38.4002	12241	PY14_273_109186_PY14-20_A725-20200724_3.raw	F2	2.39		1				51785052	38.49
		FALSE	High	Sequest HT (A3)	Unambiguous	[R].DELGIAPER.[F]		1	RecPY14His	RecPY14His	0	2	1	0	1	1	500.26	999.513	999.511	2.13	0.00107	HCD (High Energy Collision Dissociation)	MS2	26.8676	36.657	42.3149	13567	PY14_257_109481_P14_A725_20201216_1.raw	F1	2.57		1				66754536	42.26
		FALSE	High	Mascot (A5)	Unambiguous	[R].DELGIAPER.[F]		1	RecPY14His	RecPY14His	0	2	1	0	1	1	500.259	999.511	999.511	0.12	6e-05	HCD (High Energy Collision Dissociation)	MS2	0	200	58.3702	17669	PY14_257_109481_P14_A725_20201216_1.raw	F1		41	1	13	13	1.56315e-05	1.52334e+06	58.63
		FALSE	High	Mascot (A5)	Unambiguous	[R].DELGIAPER.[F]		1	RecPY14His	RecPY14His	0	2	1	0	1	1	500.259	999.511	999.511	0.12	6e-05	HCD (High Energy Collision Dissociation)	MS2	0	200	59.7064	17446	PY14_273_109186_PY14-20_A725-20200724_3.raw	F2		52	1	13	13	1.28233e-06	285787	59.81
		FALSE	High	Sequest HT (A3)	Unambiguous	[R].DELGIAPER.[F]		1	RecPY14His	RecPY14His	0	2	1	0	1	1	500.259	999.511	999.511	0.48	0.00024	HCD (High Energy Collision Dissociation)	MS2	8.85566	184.23	40.6702	12853	PY14_273_109186_PY14-20_A725-20200724_3.raw	F2	2.25		1				115922720	40.67
		FALSE	High	Mascot (A5)	Unambiguous	[R].DELGIAPER.[F]		1	RecPY14His	RecPY14His	0	2	1	0	1	1	500.259	999.51	999.511	-0.07	-3e-05	HCD (High Energy Collision Dissociation)	MS2	0	200	67.1449	19500	PY14_257_109481_P14_A725_20201216_1.raw	F1		43	1	13	13	1.09144e-05	209089	66.97
		FALSE	High	Sequest HT (A3)	Unambiguous	[R].DELGIAPER.[F]		1	RecPY14His	RecPY14His	0	2	1	0	1	1	500.258	999.51	999.511	-0.98	-0.00049	HCD (High Energy Collision Dissociation)	MS2	32.4425	141.624	55.517	17036	PY14_257_109481_P14_A725_20201216_1.raw	F1	2.24		1				15103224	55.02
		FALSE	High	Sequest HT (A3)	Unambiguous	[R].DELGIAPER.[F]		1	RecPY14His	RecPY14His	0	2	1	0	1	1	500.259	999.511	999.511	0.54	0.00027	HCD (High Energy Collision Dissociation)	MS2	13.2746	175.848	41.8168	13161	PY14_273_109186_PY14-20_A725-20200724_3.raw	F2	1.99		1				115922720	40.67
		FALSE	High	Mascot (A5)	Unambiguous	[R].DELGIAPER.[F]		1	RecPY14His	RecPY14His	0	2	1	0	1	1	500.259	999.51	999.511	-0.07	-3e-05	HCD (High Energy Collision Dissociation)	MS2	6.11446	6.092	21.1648	5918	PY14_273_109186_PY14-20_A725-20200724_3.raw	F2		37	1	13	13	3.72392e-05	9036815360	20.44
		FALSE	High	Sequest HT (A3)	Unambiguous	[R].DELGIAPER.[F]		1	RecPY14His	RecPY14His	0	2	1	0	1	1	500.259	999.511	999.511	0.61	0.0003	HCD (High Energy Collision Dissociation)	MS2	22.0248	145.815	40.9476	12930	PY14_273_109186_PY14-20_A725-20200724_3.raw	F2	2.27		1				115922720	40.67
		FALSE	High	Mascot (A5)	Unambiguous	[R].DELGIAPER.[F]		1	RecPY14His	RecPY14His	0	2	1	0	1	1	500.259	999.511	999.511	0.18	9e-05	HCD (High Energy Collision Dissociation)	MS2	0.876321	93.281	52.834	16386	PY14_257_109481_P14_A725_20201216_1.raw	F1		43	1	13	13	1.00462e-05	290801728	53.78
		FALSE	High	Mascot (A5)	Unambiguous	[R].DELGIAPER.[F]		1	RecPY14His	RecPY14His	0	2	1	0	1	1	500.259	999.511	999.511	0.12	6e-05	HCD (High Energy Collision Dissociation)	MS2	0.874608	184.936	54.9778	16926	PY14_257_109481_P14_A725_20201216_1.raw	F1		40	1	13	13	2.1727e-05	15103224	55.02
		FALSE	High	Mascot (A5)	Unambiguous	[R].DELGIAPER.[F]		1	RecPY14His	RecPY14His	0	2	1	0	1	1	500.259	999.511	999.511	0.12	6e-05	HCD (High Energy Collision Dissociation)	MS2	1.2672	200	65.353	19132	PY14_257_109481_P14_A725_20201216_1.raw	F1		41	1	13	13	1.41906e-05	110566	65.71
		FALSE	High	Sequest HT (A3)	Unambiguous	[R].DELGIAPER.[F]		1	RecPY14His	RecPY14His	0	2	1	0	1	1	500.258	999.509	999.511	-1.1	-0.00055	HCD (High Energy Collision Dissociation)	MS2	12.993	200	34.2118	10913	PY14_273_109186_PY14-20_A725-20200724_3.raw	F2	2.37		1
		FALSE	High	Mascot (A5)	Unambiguous	[R].DELGIAPER.[F]		1	RecPY14His	RecPY14His	0	2	1	0	1	1	500.259	999.511	999.511	0.24	0.00012	HCD (High Energy Collision Dissociation)	MS2	6.67431	200	52.1901	15750	PY14_273_109186_PY14-20_A725-20200724_3.raw	F2		41	1	13	13	1.59956e-05	22788818	51.97
		FALSE	High	Sequest HT (A3)	Unambiguous	[R].DELGIAPER.[F]		1	RecPY14His	RecPY14His	0	2	1	0	1	1	500.259	999.511	999.511	0.61	0.0003	HCD (High Energy Collision Dissociation)	MS2	28.2414	200	44.1264	13772	PY14_273_109186_PY14-20_A725-20200724_3.raw	F2	1.93		1				81564488	43.27
		FALSE	High	Sequest HT (A3)	Unambiguous	[R].DELGIAPER.[F]		1	RecPY14His	RecPY14His	0	2	1	0	1	1	500.259	999.511	999.511	0.91	0.00046	HCD (High Energy Collision Dissociation)	MS2	0	130.199	34.8182	11105	PY14_273_109186_PY14-20_A725-20200724_3.raw	F2	2.09		1				73982104	35.27
		FALSE	High	Sequest HT (A3)	Unambiguous	[R].DELGIAPER.[F]		1	RecPY14His	RecPY14His	0	2	1	0	1	1	500.26	999.513	999.511	2.07	0.00104	HCD (High Energy Collision Dissociation)	MS2	43.6982	75.411	40.5476	13017	PY14_257_109481_P14_A725_20201216_1.raw	F1	2.53		1				139326128	40.62
		FALSE	High	Mascot (A5)	Unambiguous	[R].DELGIAPER.[F]		1	RecPY14His	RecPY14His	0	2	1	0	1	1	500.259	999.511	999.511	0.12	6e-05	HCD (High Energy Collision Dissociation)	MS2	5.09663	165.126	34.5307	11018	PY14_273_109186_PY14-20_A725-20200724_3.raw	F2		39	1	13	13	2.66073e-05
		FALSE	High	Sequest HT (A3)	Unambiguous	[R].DELGIAPER.[F]		1	RecPY14His	RecPY14His	0	2	1	0	1	1	500.259	999.511	999.511	0.48	0.00024	HCD (High Energy Collision Dissociation)	MS2	27.6988	51.561	41.6804	13378	PY14_257_109481_P14_A725_20201216_1.raw	F1	2.49		1				98171832	41.8
		FALSE	High	Sequest HT (A3)	Unambiguous	[R].DELGIAPER.[F]		1	RecPY14His	RecPY14His	0	2	1	0	1	1	500.259	999.511	999.511	0.36	0.00018	HCD (High Energy Collision Dissociation)	MS2	7.39913	164.816	38.6715	12315	PY14_273_109186_PY14-20_A725-20200724_3.raw	F2	2.02		1				51785052	38.49
		FALSE	High	Mascot (A5)	Unambiguous	[R].DELGIAPER.[F]		1	RecPY14His	RecPY14His	0	2	1	0	1	1	500.259	999.511	999.511	0.06	3e-05	HCD (High Energy Collision Dissociation)	MS2	0	154.117	54.7229	16868	PY14_257_109481_P14_A725_20201216_1.raw	F1		41	1	13	13	1.57036e-05	20436148	54.66
		FALSE	High	Sequest HT (A3)	Unambiguous	[R].DELGIAPER.[F]		1	RecPY14His	RecPY14His	0	2	1	0	1	1	500.259	999.511	999.511	0.91	0.00046	HCD (High Energy Collision Dissociation)	MS2	9.7739	105.081	35.4471	11303	PY14_273_109186_PY14-20_A725-20200724_3.raw	F2	2.07		1				73982104	35.27
		FALSE	Medium	Sequest HT (A3)	Unambiguous	[R].DELGIAPER.[F]		1	RecPY14His	RecPY14His	0	2	1	0	1	1	500.259	999.511	999.511	0.42	0.00021	HCD (High Energy Collision Dissociation)	MS2	11.9865	114.063	38.1196	12162	PY14_273_109186_PY14-20_A725-20200724_3.raw	F2	1.78		1
		FALSE	High	Sequest HT (A3)	Unambiguous	[R].DELGIAPER.[F]		1	RecPY14His	RecPY14His	0	2	1	0	1	1	500.259	999.511	999.511	0.48	0.00024	HCD (High Energy Collision Dissociation)	MS2	16.9964	149.441	42.9745	13467	PY14_273_109186_PY14-20_A725-20200724_3.raw	F2	1.99		1				21500962	42.87
		FALSE	High	Mascot (A5)	Unambiguous	[R].DELGIAPER.[F]		1	RecPY14His	RecPY14His	0	2	1	0	1	1	500.259	999.511	999.511	0.12	6e-05	HCD (High Energy Collision Dissociation)	MS2	2.11174	67.362	52.0232	16175	PY14_257_109481_P14_A725_20201216_1.raw	F1		47	1	13	13	4.37522e-06	226771872	51.73
		FALSE	High	Mascot (A5)	Unambiguous	[R].DELGIAPER.[F]		1	RecPY14His	RecPY14His	0	2	1	0	1	1	500.259	999.511	999.511	0.18	9e-05	HCD (High Energy Collision Dissociation)	MS2	0.863943	200	56.8139	17323	PY14_257_109481_P14_A725_20201216_1.raw	F1		43	1	13	13	1.09396e-05	3110628	56.77
		FALSE	High	Mascot (A5)	Unambiguous	[R].DELGIAPER.[F]		1	RecPY14His	RecPY14His	0	2	1	0	1	1	500.259	999.511	999.511	0	0	HCD (High Energy Collision Dissociation)	MS2	1.12804	200	56.3617	16757	PY14_273_109186_PY14-20_A725-20200724_3.raw	F2		39	1	13	13	2.35505e-05	3.18047e+06	56.01
		FALSE	High	Sequest HT (A3)	Unambiguous	[R].DELGIAPER.[F]		1	RecPY14His	RecPY14His	0	2	1	0	1	1	500.259	999.51	999.511	-0.43	-0.00022	HCD (High Energy Collision Dissociation)	MS2	0	132.208	38.5112	12330	PY14_257_109481_P14_A725_20201216_1.raw	F1	2.62		1				68533824	38.37
		FALSE	High	Sequest HT (A3)	Unambiguous	[R].DELGIAPER.[F]		1	RecPY14His	RecPY14His	0	2	1	0	1	1	500.259	999.511	999.511	0.12	6e-05	HCD (High Energy Collision Dissociation)	MS2	0	90.126	39.7223	12751	PY14_257_109481_P14_A725_20201216_1.raw	F1	2.73		1				89329840	39.82
		FALSE	High	Sequest HT (A3)	Unambiguous	[R].DELGIAPER.[F]		1	RecPY14His	RecPY14His	0	2	1	0	1	1	500.259	999.511	999.511	0.61	0.0003	HCD (High Energy Collision Dissociation)	MS2	17.7812	77.101	40.2748	12931	PY14_257_109481_P14_A725_20201216_1.raw	F1	2.57		1				75457856	40.12
		FALSE	High	Mascot (A5)	Unambiguous	[R].DELGIAPER.[F]		1	RecPY14His	RecPY14His	0	2	1	0	1	1	500.259	999.511	999.511	0.18	9e-05	HCD (High Energy Collision Dissociation)	MS2	1.01935	200	55.0811	16467	PY14_273_109186_PY14-20_A725-20200724_3.raw	F2		47	1	13	13	4.46684e-06	4.99394e+06	55.05
		FALSE	High	Mascot (A5)	Unambiguous	[R].DELGIAPER.[F]		1	RecPY14His	RecPY14His	0	2	1	0	1	1	500.259	999.511	999.511	0.12	6e-05	HCD (High Energy Collision Dissociation)	MS2	5.59347	200	57.9012	17078	PY14_273_109186_PY14-20_A725-20200724_3.raw	F2		54	1	13	13	7.19449e-07	216466	57.98
		FALSE	High	Sequest HT (A3)	Unambiguous	[R].DELGIAPER.[F]		1	RecPY14His	RecPY14His	0	2	1	0	1	1	500.259	999.511	999.511	0.06	3e-05	HCD (High Energy Collision Dissociation)	MS2	23.1812	189.012	44.4243	13849	PY14_273_109186_PY14-20_A725-20200724_3.raw	F2	2.06		1				81564488	43.27
		FALSE	High	Mascot (A5)	Unambiguous	[R].DELGIAPER.[F]		1	RecPY14His	RecPY14His	0	2	1	0	1	1	500.259	999.511	999.511	0.12	6e-05	HCD (High Energy Collision Dissociation)	MS2	3.2363	200	59.9635	17497	PY14_273_109186_PY14-20_A725-20200724_3.raw	F2		46	1	13	13	5.14044e-06	359127	59.98
		FALSE	High	Mascot (A5)	Unambiguous	[R].DELGIAPER.[F]		1	RecPY14His	RecPY14His	0	2	1	0	1	1	500.259	999.51	999.511	-0.13	-6e-05	HCD (High Energy Collision Dissociation)	MS2	6.44359	200	60.7277	17650	PY14_273_109186_PY14-20_A725-20200724_3.raw	F2		48	1	13	13	3.3266e-06	154914	60.74
		FALSE	High	Mascot (A5)	Unambiguous	[R].DELGIAPER.[F]		1	RecPY14His	RecPY14His	0	2	1	0	1	1	500.259	999.511	999.511	0.12	6e-05	HCD (High Energy Collision Dissociation)	MS2	2.13714	200	54.8247	16406	PY14_273_109186_PY14-20_A725-20200724_3.raw	F2		44	1	13	13	8.31764e-06	5.8878e+06	54.72
		FALSE	High	Sequest HT (A3)	Unambiguous	[R].DELGIAPER.[F]		1	RecPY14His	RecPY14His	0	2	1	0	1	1	500.259	999.511	999.511	0.54	0.00027	HCD (High Energy Collision Dissociation)	MS2	12.5297	200	40.1086	12702	PY14_273_109186_PY14-20_A725-20200724_3.raw	F2	2.41		1				65286876	39.83
		FALSE	Medium	Sequest HT (A3)	Unambiguous	[R].DELGIAPER.[F]		1	RecPY14His	RecPY14His	0	2	1	0	1	1	500.259	999.511	999.511	0.91	0.00046	HCD (High Energy Collision Dissociation)	MS2	18.2616	200	44.7052	13921	PY14_273_109186_PY14-20_A725-20200724_3.raw	F2	1.51		1
		FALSE	High	Sequest HT (A3)	Unambiguous	[R].DELGIAPER.[F]		1	RecPY14His	RecPY14His	0	2	1	0	1	1	500.258	999.509	999.511	-1.23	-0.00061	HCD (High Energy Collision Dissociation)	MS2	14.5028	200	33.6421	10719	PY14_273_109186_PY14-20_A725-20200724_3.raw	F2	2.42		1
		FALSE	High	Mascot (A5)	Unambiguous	[R].DELGIAPER.[F]		1	RecPY14His	RecPY14His	0	2	1	0	1	1	500.259	999.51	999.511	-0.13	-6e-05	HCD (High Energy Collision Dissociation)	MS2	4.05452	200	64.8496	18480	PY14_273_109186_PY14-20_A725-20200724_3.raw	F2		41	1	13	13	1.72584e-05	175762	65.07
		FALSE	High	Sequest HT (A3)	Unambiguous	[R].DELGIAPER.[F]		1	RecPY14His	RecPY14His	0	2	1	0	1	1	500.259	999.511	999.511	0.12	6e-05	HCD (High Energy Collision Dissociation)	MS2	0.874608	184.936	54.9778	16926	PY14_257_109481_P14_A725_20201216_1.raw	F1	2.43		1				15103224	55.02
		FALSE	High	Mascot (A5)	Unambiguous	[R].DELGIAPER.[F]		1	RecPY14His	RecPY14His	0	2	1	0	1	1	500.259	999.51	999.511	-0.07	-3e-05	HCD (High Energy Collision Dissociation)	MS2	0	200	67.6595	19605	PY14_257_109481_P14_A725_20201216_1.raw	F1		44	1	13	13	7.46449e-06	185724	67.34
		FALSE	High	Mascot (A5)	Unambiguous	[R].DELGIAPER.[F]		1	RecPY14His	RecPY14His	0	2	1	0	1	1	500.259	999.511	999.511	0.12	6e-05	HCD (High Energy Collision Dissociation)	MS2	0	200	57.3934	16974	PY14_273_109186_PY14-20_A725-20200724_3.raw	F2		47	1	13	13	4.3451e-06	440278	57.28
		FALSE	High	Mascot (A5)	Unambiguous	[R].DELGIAPER.[F]		1	RecPY14His	RecPY14His	0	2	1	0	1	1	500.259	999.511	999.511	0.18	9e-05	HCD (High Energy Collision Dissociation)	MS2	2.36331	200	63.0541	18124	PY14_273_109186_PY14-20_A725-20200724_3.raw	F2		41	1	13	13	1.57761e-05
		FALSE	High	Mascot (A5)	Unambiguous	[R].DELGIAPER.[F]		1	RecPY14His	RecPY14His	0	2	1	0	1	1	500.259	999.511	999.511	0.18	9e-05	HCD (High Energy Collision Dissociation)	MS2	4.78779	145.866	53.7597	16149	PY14_273_109186_PY14-20_A725-20200724_3.raw	F2		43	1	13	13	1.09648e-05	25844196	53.87
		FALSE	High	Mascot (A5)	Unambiguous	[R].DELGIAPER.[F]		1	RecPY14His	RecPY14His	0	2	1	0	1	1	500.259	999.511	999.511	0.18	9e-05	HCD (High Energy Collision Dissociation)	MS2	0	200	67.9144	19655	PY14_257_109481_P14_A725_20201216_1.raw	F1		41	1	13	13	1.5417e-05	111884	68.16
		FALSE	High	Sequest HT (A3)	Unambiguous	[R].DELGIAPER.[F]		1	RecPY14His	RecPY14His	0	2	1	0	1	1	500.259	999.511	999.511	0.67	0.00033	HCD (High Energy Collision Dissociation)	MS2	18.558	44.864	41.3994	13287	PY14_257_109481_P14_A725_20201216_1.raw	F1	2.56		1				139889536	41.37
		FALSE	High	Sequest HT (A3)	Unambiguous	[R].DELGIAPER.[F]		1	RecPY14His	RecPY14His	0	2	1	0	1	1	500.26	999.513	999.511	2.01	0.001	HCD (High Energy Collision Dissociation)	MS2	21.0105	63.354	40.8296	13107	PY14_257_109481_P14_A725_20201216_1.raw	F1	2.62		1				139326128	40.62
		FALSE	High	Sequest HT (A3)	Unambiguous	[R].DELGIAPER.[F]		1	RecPY14His	RecPY14His	0	2	1	0	1	1	500.259	999.511	999.511	0.54	0.00027	HCD (High Energy Collision Dissociation)	MS2	10.7157	200	33.923	10814	PY14_273_109186_PY14-20_A725-20200724_3.raw	F2	2.37		1
		FALSE	High	Mascot (A5)	Unambiguous	[R].DELGIAPER.[F]		1	RecPY14His	RecPY14His	0	2	1	0	1	1	500.259	999.511	999.511	0.12	6e-05	HCD (High Energy Collision Dissociation)	MS2	32.2966	200	46.4263	14368	PY14_273_109186_PY14-20_A725-20200724_3.raw	F2		43	1	13	13	1.04472e-05	31657472	46.96
		FALSE	High	Mascot (A5)	Unambiguous	[R].DELGIAPER.[F]		1	RecPY14His	RecPY14His	0	2	1	0	1	1	500.259	999.51	999.511	-0.13	-6e-05	HCD (High Energy Collision Dissociation)	MS2	2.94274	200	67.4198	18988	PY14_273_109186_PY14-20_A725-20200724_3.raw	F2		30	1	13	13	0.000180717	108991	67.54
		FALSE	Medium	Sequest HT (A3)	Unambiguous	[R].DELGIAPER.[F]		1	RecPY14His	RecPY14His	0	2	1	0	1	1	500.259	999.511	999.511	0.12	6e-05	HCD (High Energy Collision Dissociation)	MS2	23.1634	166.979	39.2468	12469	PY14_273_109186_PY14-20_A725-20200724_3.raw	F2	1.82		1
		FALSE	High	Mascot (A5)	Unambiguous	[R].DELGIAPER.[F]		1	RecPY14His	RecPY14His	0	2	1	0	1	1	500.259	999.51	999.511	-0.13	-6e-05	HCD (High Energy Collision Dissociation)	MS2	0	200	60.22	17549	PY14_273_109186_PY14-20_A725-20200724_3.raw	F2		33	1	13	13	8.93305e-05	204489	60.19
		FALSE	Medium	Sequest HT (A3)	Unambiguous	[R].DELGIAPER.[F]		1	RecPY14His	RecPY14His	0	2	1	0	1	1	500.259	999.511	999.511	0.54	0.00027	HCD (High Energy Collision Dissociation)	MS2	22.0052	200	44.9938	13996	PY14_273_109186_PY14-20_A725-20200724_3.raw	F2	1.79		1
		FALSE	High	Mascot (A5)	Unambiguous	[R].DELGIAPER.[F]		1	RecPY14His	RecPY14His	0	2	1	0	1	1	500.259	999.511	999.511	0.12	6e-05	HCD (High Energy Collision Dissociation)	MS2	2.85059	200	68.4464	19190	PY14_273_109186_PY14-20_A725-20200724_3.raw	F2		39	1	13	13	2.7227e-05	194186	68.74
		FALSE	High	Sequest HT (A3)	Unambiguous	[R].DELGIAPER.[F]		1	RecPY14His	RecPY14His	0	2	1	0	1	1	500.259	999.511	999.511	0.48	0.00024	HCD (High Energy Collision Dissociation)	MS2	12.4093	107.844	33.3516	10617	PY14_273_109186_PY14-20_A725-20200724_3.raw	F2	2.28		1
		FALSE	High	Sequest HT (A3)	Unambiguous	[R].DELGIAPER.[F]		1	RecPY14His	RecPY14His	0	2	1	0	1	1	500.26	999.512	999.511	1.46	0.00073	HCD (High Energy Collision Dissociation)	MS2	18.3931	35.022	41.1089	13194	PY14_257_109481_P14_A725_20201216_1.raw	F1	2.45		1				139889536	41.37
		FALSE	High	Mascot (A5)	Unambiguous	[R].DELGIAPER.[F]		1	RecPY14His	RecPY14His	0	2	1	0	1	1	500.259	999.511	999.511	0.18	9e-05	HCD (High Energy Collision Dissociation)	MS2	1.10092	200	61.7371	18387	PY14_257_109481_P14_A725_20201216_1.raw	F1		43	1	13	13	1.08393e-05	478316	61.91
		FALSE	High	Mascot (A5)	Unambiguous	[R].DELGIAPER.[F]		1	RecPY14His	RecPY14His	0	2	1	0	1	1	500.259	999.511	999.511	0.24	0.00012	HCD (High Energy Collision Dissociation)	MS2	1.08221	200	69.1979	19915	PY14_257_109481_P14_A725_20201216_1.raw	F1		41	1	13	13	1.54525e-05	475364	69.19
		FALSE	High	Mascot (A5)	Unambiguous	[R].DELGIAPER.[F]		1	RecPY14His	RecPY14His	0	2	1	0	1	1	500.259	999.511	999.511	0.12	6e-05	HCD (High Energy Collision Dissociation)	MS2	3.06713	200	57.1331	16919	PY14_273_109186_PY14-20_A725-20200724_3.raw	F2		48	1	13	13	3.10456e-06	608679	57.09
		FALSE	High	Mascot (A5)	Unambiguous	[R].DELGIAPER.[F]		1	RecPY14His	RecPY14His	0	2	1	0	1	1	500.259	999.511	999.511	0.12	6e-05	HCD (High Energy Collision Dissociation)	MS2	9.76668	200	58.9352	17289	PY14_273_109186_PY14-20_A725-20200724_3.raw	F2		38	1	13	13	3.03389e-05	374808	58.88
		FALSE	High	Mascot (A5)	Unambiguous	[R].DELGIAPER.[F]		1	RecPY14His	RecPY14His	0	2	1	0	1	1	500.259	999.511	999.511	0.24	0.00012	HCD (High Energy Collision Dissociation)	MS2	1.52787	200	69.976	20072	PY14_257_109481_P14_A725_20201216_1.raw	F1		44	1	13	13	7.56833e-06	90578	69.94
		FALSE	High	Sequest HT (A3)	Unambiguous	[R].DELGIAPER.[F]		1	RecPY14His	RecPY14His	0	2	1	0	1	1	500.259	999.511	999.511	0.61	0.0003	HCD (High Energy Collision Dissociation)	MS2	16.7561	172.311	39.5389	12546	PY14_273_109186_PY14-20_A725-20200724_3.raw	F2	2		1				65286876	39.83
		FALSE	High	Mascot (A5)	Unambiguous	[R].DELGIAPER.[F]		1	RecPY14His	RecPY14His	0	2	1	0	1	1	500.259	999.51	999.511	-0.13	-6e-05	HCD (High Energy Collision Dissociation)	MS2	0	200	69.985	19493	PY14_273_109186_PY14-20_A725-20200724_3.raw	F2		23	1	13	13	0.00103753	276766	69.66
		FALSE	High	Sequest HT (A3)	Unambiguous	[R].DELGIAPER.[F]		1	RecPY14His	RecPY14His	0	2	1	0	1	1	500.259	999.511	999.511	0.06	3e-05	HCD (High Energy Collision Dissociation)	MS2	0	186.947	54.4671	16808	PY14_257_109481_P14_A725_20201216_1.raw	F1	2.41		1				8.37182e+06	54.41
		FALSE	High	Mascot (A5)	Unambiguous	[R].DELGIAPER.[F]		1	RecPY14His	RecPY14His	0	2	1	0	1	1	500.259	999.511	999.511	0.12	6e-05	HCD (High Energy Collision Dissociation)	MS2	0	200	65.871	18681	PY14_273_109186_PY14-20_A725-20200724_3.raw	F2		47	1	13	13	3.84592e-06
		FALSE	High	Mascot (A5)	Unambiguous	[R].DELGIAPER.[F]		1	RecPY14His	RecPY14His	0	2	1	0	1	1	500.259	999.51	999.511	-0.13	-6e-05	HCD (High Energy Collision Dissociation)	MS2	0	200	69.2106	19339	PY14_273_109186_PY14-20_A725-20200724_3.raw	F2		31	1	13	13	0.000146893	175221	69.2
		FALSE	High	Mascot (A5)	Unambiguous	[R].DELGIAPER.[F]		1	RecPY14His	RecPY14His	0	2	1	0	1	1	500.259	999.511	999.511	0	0	HCD (High Energy Collision Dissociation)	MS2	22.6082	162.295	41.234	13008	PY14_273_109186_PY14-20_A725-20200724_3.raw	F2		42	1	13	13	1.20781e-05	115922720	40.67
		FALSE	High	Mascot (A5)	Unambiguous	[R].DELGIAPER.[F]		1	RecPY14His	RecPY14His	0	2	1	0	1	1	500.259	999.511	999.511	0.06	3e-05	HCD (High Energy Collision Dissociation)	MS2	2.76413	153.868	54.016	16211	PY14_273_109186_PY14-20_A725-20200724_3.raw	F2		43	1	13	13	1.09648e-05	25844196	53.87
		FALSE	High	Mascot (A5)	Unambiguous	[R].DELGIAPER.[F]		1	RecPY14His	RecPY14His	0	2	1	0	1	1	500.259	999.511	999.511	0	0	HCD (High Energy Collision Dissociation)	MS2	0	200	62.5362	18019	PY14_273_109186_PY14-20_A725-20200724_3.raw	F2		45	1	13	13	7.04693e-06	300063	62.24
		FALSE	High	Sequest HT (A3)	Unambiguous	[R].DELGIAPER.[F]		1	RecPY14His	RecPY14His	0	2	1	0	1	1	500.26	999.513	999.511	2.13	0.00107	HCD (High Energy Collision Dissociation)	MS2	16.0098	85.076	39.9837	12838	PY14_257_109481_P14_A725_20201216_1.raw	F1	2.67		1				75457856	40.12
		FALSE	High	Sequest HT (A3)	Unambiguous	[R].DELGIAPER.[F]		1	RecPY14His	RecPY14His	0	2	1	0	1	1	500.26	999.512	999.511	1.22	0.00061	HCD (High Energy Collision Dissociation)	MS2	43.3639	135.734	37.5762	12010	PY14_273_109186_PY14-20_A725-20200724_3.raw	F2	2.26		1				27952984	37.34
		FALSE	High	Sequest HT (A3)	Unambiguous	[R].DELGIAPER.[F]		1	RecPY14His	RecPY14His	0	2	1	0	1	1	500.259	999.511	999.511	0.85	0.00042	HCD (High Energy Collision Dissociation)	MS2	12.1654	192.106	42.4067	13315	PY14_273_109186_PY14-20_A725-20200724_3.raw	F2	2.1		1				33751296	42.32
		FALSE	High	Sequest HT (A3)	Unambiguous	[R].DELGIAPER.[F]		1	RecPY14His	RecPY14His	0	2	1	0	1	1	500.259	999.511	999.511	0.3	0.00015	HCD (High Energy Collision Dissociation)	MS2	21.681	170.241	41.5254	13084	PY14_273_109186_PY14-20_A725-20200724_3.raw	F2	2.15		1				115922720	40.67
		FALSE	High	Mascot (A5)	Unambiguous	[R].DELGIAPER.[F]		1	RecPY14His	RecPY14His	0	2	1	0	1	1	500.259	999.511	999.511	0.18	9e-05	HCD (High Energy Collision Dissociation)	MS2	2.44497	200	56.1093	16703	PY14_273_109186_PY14-20_A725-20200724_3.raw	F2		43	1	13	13	1.07647e-05	3.18047e+06	56.01
		FALSE	High	Mascot (A5)	Unambiguous	[R].DELGIAPER.[F]		1	RecPY14His	RecPY14His	0	2	1	0	1	1	500.259	999.511	999.511	0.06	3e-05	HCD (High Energy Collision Dissociation)	MS2	3.75413	200	58.4141	17182	PY14_273_109186_PY14-20_A725-20200724_3.raw	F2		45	1	13	13	5.68853e-06	258327	58.44
		FALSE	High	Mascot (A5)	Unambiguous	[R].DELGIAPER.[F]		1	RecPY14His	RecPY14His	0	2	1	0	1	1	500.259	999.511	999.511	0.06	3e-05	HCD (High Energy Collision Dissociation)	MS2	8.62452	200	55.334	16525	PY14_273_109186_PY14-20_A725-20200724_3.raw	F2		40	1	13	13	2.01837e-05	4061082	55.28
		FALSE	High	Sequest HT (A3)	Unambiguous	[R].DELGIAPER.[F]		1	RecPY14His	RecPY14His	0	2	1	0	1	1	500.26	999.512	999.511	1.71	0.00085	HCD (High Energy Collision Dissociation)	MS2	28.4987	122.164	42.619	13661	PY14_257_109481_P14_A725_20201216_1.raw	F1	2.72		1				90034048	42.48
		FALSE	High	Mascot (A5)	Unambiguous	[R].DELGIAPER.[F]		1	RecPY14His	RecPY14His	0	2	1	0	1	1	500.259	999.511	999.511	0.18	9e-05	HCD (High Energy Collision Dissociation)	MS2	0	200	64.069	18328	PY14_273_109186_PY14-20_A725-20200724_3.raw	F2		46	1	13	13	4.9204e-06	431909	63.99
		FALSE	High	Mascot (A5)	Unambiguous	[R].DELGIAPER.[F]		1	RecPY14His	RecPY14His	0	2	1	0	1	1	500.259	999.511	999.511	0.06	3e-05	HCD (High Energy Collision Dissociation)	MS2	10.1358	200	60.477	17601	PY14_273_109186_PY14-20_A725-20200724_3.raw	F2		51	1	13	13	1.51356e-06	154914	60.74
		FALSE	High	Mascot (A5)	Unambiguous	[R].DELGIAPER.[F]		1	RecPY14His	RecPY14His	0	2	1	0	1	1	500.259	999.511	999.511	0.18	9e-05	HCD (High Energy Collision Dissociation)	MS2	6.60113	200	69.7285	19440	PY14_273_109186_PY14-20_A725-20200724_3.raw	F2		33	1	13	13	9.59401e-05	276766	69.66
		FALSE	High	Sequest HT (A3)	Unambiguous	[R].DELGIAPER.[F]		1	RecPY14His	RecPY14His	0	2	1	0	1	1	500.259	999.511	999.511	0.06	3e-05	HCD (High Energy Collision Dissociation)	MS2	13.4308	147.338	37.1958	11899	PY14_273_109186_PY14-20_A725-20200724_3.raw	F2	2.31		1				56853908	36.76
		FALSE	High	Sequest HT (A3)	Unambiguous	[R].DELGIAPER.[F]		1	RecPY14His	RecPY14His	0	2	1	0	1	1	500.26	999.512	999.511	1.52	0.00076	HCD (High Energy Collision Dissociation)	MS2	18.5094	146.453	36.9084	11816	PY14_273_109186_PY14-20_A725-20200724_3.raw	F2	2.29		1				56853908	36.76
		FALSE	High	Sequest HT (A3)	Unambiguous	[R].DELGIAPER.[F]		1	RecPY14His	RecPY14His	0	2	1	0	1	1	500.26	999.513	999.511	2.01	0.001	HCD (High Energy Collision Dissociation)	MS2	24.2188	42.674	42.9346	13765	PY14_257_109481_P14_A725_20201216_1.raw	F1	2.05		1				53118608	42.96
		FALSE	High	Mascot (A5)	Unambiguous	[R].DELGIAPER.[F]		1	RecPY14His	RecPY14His	0	2	1	0	1	1	500.259	999.511	999.511	0.18	9e-05	HCD (High Energy Collision Dissociation)	MS2	1.66338	200	58.1578	17130	PY14_273_109186_PY14-20_A725-20200724_3.raw	F2		43	1	13	13	9.72747e-06	258327	58.44
		FALSE	High	Sequest HT (A3)	Unambiguous	[R].DELGIAPER.[F]		1	RecPY14His	RecPY14His	0	2	1	0	1	1	500.259	999.512	999.511	1.03	0.00052	HCD (High Energy Collision Dissociation)	MS2	26.4631	91.529	39.4338	12655	PY14_257_109481_P14_A725_20201216_1.raw	F1	2.6		1				89329840	39.82
		FALSE	High	Mascot (A5)	Unambiguous	[R].DELGIAPER.[F]		1	RecPY14His	RecPY14His	0	2	1	0	1	1	500.259	999.511	999.511	0.06	3e-05	HCD (High Energy Collision Dissociation)	MS2	0	200	57.6468	17026	PY14_273_109186_PY14-20_A725-20200724_3.raw	F2		47	1	13	13	3.90841e-06	216466	57.98
		FALSE	High	Mascot (A5)	Unambiguous	[R].DELGIAPER.[F]		1	RecPY14His	RecPY14His	0	2	1	0	1	1	500.259	999.511	999.511	0.12	6e-05	HCD (High Energy Collision Dissociation)	MS2	0	200	59.6543	17947	PY14_257_109481_P14_A725_20201216_1.raw	F1		43	1	13	13	1.10917e-05	1.58955e+06	59.67
		FALSE	High	Mascot (A5)	Unambiguous	[R].DELGIAPER.[F]		1	RecPY14His	RecPY14His	0	2	1	0	1	1	500.259	999.511	999.511	0	0	HCD (High Energy Collision Dissociation)	MS2	0	200	63.3071	18174	PY14_273_109186_PY14-20_A725-20200724_3.raw	F2		43	1	13	13	1.04232e-05
		FALSE	High	Mascot (A5)	Unambiguous	[R].DELGIAPER.[F]		1	RecPY14His	RecPY14His	0	2	1	0	1	1	500.259	999.511	999.511	0.12	6e-05	HCD (High Energy Collision Dissociation)	MS2	0	90.126	39.7223	12751	PY14_257_109481_P14_A725_20201216_1.raw	F1		39	1	13	13	2.31206e-05	89329840	39.82
		FALSE	High	Mascot (A5)	Unambiguous	[R].DELGIAPER.[F]		1	RecPY14His	RecPY14His	0	2	1	0	1	1	500.259	999.511	999.511	0.06	3e-05	HCD (High Energy Collision Dissociation)	MS2	23.1812	189.012	44.4243	13849	PY14_273_109186_PY14-20_A725-20200724_3.raw	F2		45	1	13	13	6.47143e-06	81564488	43.27
		FALSE	High	Mascot (A5)	Unambiguous	[R].DELGIAPER.[F]		1	RecPY14His	RecPY14His	0	2	1	0	1	1	500.259	999.511	999.511	0.18	9e-05	HCD (High Energy Collision Dissociation)	MS2	0	200	67.6752	19037	PY14_273_109186_PY14-20_A725-20200724_3.raw	F2		62	1	13	13	1.37088e-07	179179	67.71
		FALSE	High	Sequest HT (A3)	Unambiguous	[R].DELGIAPER.[F]		1	RecPY14His	RecPY14His	0	2	1	0	1	1	500.259	999.511	999.511	0.36	0.00018	HCD (High Energy Collision Dissociation)	MS2	27.1944	83.747	38.8646	12458	PY14_257_109481_P14_A725_20201216_1.raw	F1	2.73		1				94004008	39
		FALSE	High	Mascot (A5)	Unambiguous	[R].DELGIAPER.[F]		1	RecPY14His	RecPY14His	0	2	1	0	1	1	500.259	999.511	999.511	0	0	HCD (High Energy Collision Dissociation)	MS2	2.42583	200	60.9824	17704	PY14_273_109186_PY14-20_A725-20200724_3.raw	F2		35	1	13	13	6.48634e-05	439336	61.03
		FALSE	High	Mascot (A5)	Unambiguous	[R].DELGIAPER.[F]		1	RecPY14His	RecPY14His	0	2	1	0	1	1	500.259	999.511	999.511	0.18	9e-05	HCD (High Energy Collision Dissociation)	MS2	0	200	60.428	18112	PY14_257_109481_P14_A725_20201216_1.raw	F1		40	1	13	13	2.14783e-05	587693	60.81
		FALSE	High	Mascot (A5)	Unambiguous	[R].DELGIAPER.[F]		1	RecPY14His	RecPY14His	0	2	1	0	1	1	500.259	999.511	999.511	0.18	9e-05	HCD (High Energy Collision Dissociation)	MS2	1.07561	200	60.1692	18057	PY14_257_109481_P14_A725_20201216_1.raw	F1		43	1	13	13	1.10154e-05	676941	60.08
		FALSE	High	Mascot (A5)	Unambiguous	[R].DELGIAPER.[F]		1	RecPY14His	RecPY14His	0	2	1	0	1	1	500.259	999.511	999.511	0.18	9e-05	HCD (High Energy Collision Dissociation)	MS2	1.50233	200	59.3989	17892	PY14_257_109481_P14_A725_20201216_1.raw	F1		40	1	13	13	2.05116e-05	1.37784e+06	59.38
		FALSE	High	Mascot (A5)	Unambiguous	[R].DELGIAPER.[F]		1	RecPY14His	RecPY14His	0	2	1	0	1	1	500.259	999.511	999.511	0	0	HCD (High Energy Collision Dissociation)	MS2	5.20399	200	58.6712	17235	PY14_273_109186_PY14-20_A725-20200724_3.raw	F2		40	1	13	13	2.05116e-05	127026	58.64
		FALSE	Medium	Sequest HT (A3)	Unambiguous	[R].DELGIAPER.[F]		1	RecPY14His	RecPY14His	0	2	1	0	1	1	500.259	999.511	999.511	0	0	HCD (High Energy Collision Dissociation)	MS2	22.6082	162.295	41.234	13008	PY14_273_109186_PY14-20_A725-20200724_3.raw	F2	1.87		1
		FALSE	High	Sequest HT (A3)	Unambiguous	[R].DELGIAPER.[F]		1	RecPY14His	RecPY14His	0	2	1	0	1	1	500.259	999.511	999.511	0.73	0.00036	HCD (High Energy Collision Dissociation)	MS2	15.9703	200	42.7023	13392	PY14_273_109186_PY14-20_A725-20200724_3.raw	F2	1.99		1				21500962	42.87
		FALSE	High	Sequest HT (A3)	Unambiguous	[R].DELGIAPER.[F]		1	RecPY14His	RecPY14His	0	2	1	0	1	1	500.26	999.512	999.511	1.77	0.00088	HCD (High Energy Collision Dissociation)	MS2	29.9552	52.39	43.5064	13939	PY14_257_109481_P14_A725_20201216_1.raw	F1	2.33		1				53118608	42.96
		FALSE	High	Mascot (A5)	Unambiguous	[R].DELGIAPER.[F]		1	RecPY14His	RecPY14His	0	2	1	0	1	1	500.259	999.511	999.511	0.18	9e-05	HCD (High Energy Collision Dissociation)	MS2	43.6512	138.508	47.9507	14766	PY14_273_109186_PY14-20_A725-20200724_3.raw	F2		28	1	13	13	0.000301995	16539502	47.82
		FALSE	High	Mascot (A5)	Unambiguous	[R].DELGIAPER.[F]		1	RecPY14His	RecPY14His	0	2	1	0	1	1	500.259	999.511	999.511	0.18	9e-05	HCD (High Energy Collision Dissociation)	MS2	0.975815	59.253	53.9438	16679	PY14_257_109481_P14_A725_20201216_1.raw	F1		41	1	13	13	1.57761e-05	290801728	53.78
		FALSE	High	Sequest HT (A3)	Unambiguous	[R].DELGIAPER.[F]		1	RecPY14His	RecPY14His	0	2	1	0	1	1	500.259	999.511	999.511	0.3	0.00015	HCD (High Energy Collision Dissociation)	MS2	3.64738	180.455	55.2345	16980	PY14_257_109481_P14_A725_20201216_1.raw	F1	2.64		1				15103224	55.02
		FALSE	High	Sequest HT (A3)	Unambiguous	[R].DELGIAPER.[F]		1	RecPY14His	RecPY14His	0	2	1	0	1	1	500.259	999.511	999.511	0.36	0.00018	HCD (High Energy Collision Dissociation)	MS2	13.5267	125.972	37.8457	12086	PY14_273_109186_PY14-20_A725-20200724_3.raw	F2	2.27		1				27952984	37.34
		FALSE	High	Mascot (A5)	Unambiguous	[R].DELGIAPER.[F]		1	RecPY14His	RecPY14His	0	2	1	0	1	1	500.259	999.511	999.511	0.06	3e-05	HCD (High Energy Collision Dissociation)	MS2	13.4308	147.338	37.1958	11899	PY14_273_109186_PY14-20_A725-20200724_3.raw	F2		42	1	13	13	1.1298e-05	56853908	36.76
		FALSE	High	Mascot (A5)	Unambiguous	[R].DELGIAPER.[F]		1	RecPY14His	RecPY14His	0	2	1	0	1	1	500.259	999.511	999.511	0.18	9e-05	HCD (High Energy Collision Dissociation)	MS2	2.61336	200	68.9572	19291	PY14_273_109186_PY14-20_A725-20200724_3.raw	F2		33	1	13	13	0.000109144	194186	68.74
		FALSE	High	Sequest HT (A3)	Unambiguous	[R].DELGIAPER.[F]		1	RecPY14His	RecPY14His	0	2	1	0	1	1	500.259	999.511	999.511	0.18	9e-05	HCD (High Energy Collision Dissociation)	MS2	0	200	67.9144	19655	PY14_257_109481_P14_A725_20201216_1.raw	F1	2.24		1				111884	68.16
		FALSE	High	Sequest HT (A3)	Unambiguous	[R].DELGIAPER.[F]		1	RecPY14His	RecPY14His	0	2	1	0	1	1	500.259	999.511	999.511	0.85	0.00042	HCD (High Energy Collision Dissociation)	MS2	0	154.47	35.1521	11214	PY14_273_109186_PY14-20_A725-20200724_3.raw	F2	2.3		1				73982104	35.27
		FALSE	High	Mascot (A5)	Unambiguous	[R].DELGIAPER.[F]		1	RecPY14His	RecPY14His	0	2	1	0	1	1	500.258	999.51	999.511	-0.98	-0.00049	HCD (High Energy Collision Dissociation)	MS2	0.386743	0.554	19.5083	5232	PY14_273_109186_PY14-20_A725-20200724_3.raw	F2		46	1	13	13	4.7863e-06	380120563712	18.77
		FALSE	High	Mascot (A5)	Unambiguous	[R].DELGIAPER.[F]		1	RecPY14His	RecPY14His	0	2	1	0	1	1	500.258	999.508	999.511	-2.57	-0.00128	HCD (High Energy Collision Dissociation)	MS2	44.114	91.103	35.2158	10995	PY14_257_109481_P14_A725_20201216_1.raw	F1		36	1	13	13	5.59758e-05	98603808	35.33
		FALSE	High	Mascot (A5)	Unambiguous	[R].DELGIAPER.[F]		1	RecPY14His	RecPY14His	0	2	1	0	1	1	500.258	999.508	999.511	-2.33	-0.00116	HCD (High Energy Collision Dissociation)	MS2	1.04044	0.732	20.5585	5652	PY14_273_109186_PY14-20_A725-20200724_3.raw	F2		40	1	13	13	2.01837e-05	9036815360	20.44
		FALSE	High	Mascot (A5)	Unambiguous	[R].DELGIAPER.[F]		1	RecPY14His	RecPY14His	0	2	1	0	1	1	500.257	999.506	999.511	-4.4	-0.0022	HCD (High Energy Collision Dissociation)	MS2	9.03728	26.611	27.5542	7792	PY14_257_109481_P14_A725_20201216_1.raw	F1		39	1	13	13	2.39883e-05	331083072	27.37
		FALSE	High	Mascot (A5)	Unambiguous	[R].DELGIAPER.[F]		1	RecPY14His	RecPY14His	0	2	1	0	1	1	500.258	999.508	999.511	-2.26	-0.00113	HCD (High Energy Collision Dissociation)	MS2	0	2.005	22.5093	5538	PY14_257_109481_P14_A725_20201216_1.raw	F1		38	1	13	13	3.1842e-05	488286715904	21.57
		FALSE	High	Mascot (A5)	Unambiguous	[R].DELGIAPER.[F]		1	RecPY14His	RecPY14His	0	2	1	0	1	1	500.258	999.508	999.511	-2.26	-0.00113	HCD (High Energy Collision Dissociation)	MS2	15.3166	187.636	34.9228	10889	PY14_257_109481_P14_A725_20201216_1.raw	F1		37	1	13	13	4.27563e-05	48718744	34.92
		FALSE	High	Sequest HT (A3)	Unambiguous	[R].DELGIAPER.[F]		1	RecPY14His	RecPY14His	0	2	1	0	1	1	500.26	999.512	999.511	1.46	0.00073	HCD (High Energy Collision Dissociation)	MS2	5.65379	25.495	28.0934	8036	PY14_257_109481_P14_A725_20201216_1.raw	F1	2.57		1				488042976	27.93
		FALSE	High	Mascot (A5)	Unambiguous	[R].DELGIAPER.[F]		1	RecPY14His	RecPY14His	0	2	1	0	1	1	500.258	999.508	999.511	-2.2	-0.0011	HCD (High Energy Collision Dissociation)	MS2	6.69451	1.635	21.1732	4962	PY14_257_109481_P14_A725_20201216_1.raw	F1		41	1	13	13	1.59588e-05	488286715904	21.57
		FALSE	High	Sequest HT (A3)	Unambiguous	[R].DELGIAPER.[F]		1	RecPY14His	RecPY14His	0	2	1	0	1	1	500.259	999.511	999.511	0.12	6e-05	HCD (High Energy Collision Dissociation)	MS2	0	200	59.6543	17947	PY14_257_109481_P14_A725_20201216_1.raw	F1	2.56		1				1.58955e+06	59.67
		FALSE	High	Sequest HT (A3)	Unambiguous	[R].DELGIAPER.[F]		1	RecPY14His	RecPY14His	0	2	1	0	1	1	500.259	999.511	999.511	0.48	0.00024	HCD (High Energy Collision Dissociation)	MS2	14.5105	10.13	22.2908	6392	PY14_273_109186_PY14-20_A725-20200724_3.raw	F2	2.2		1				4809799680	22.54
		FALSE	High	Mascot (A5)	Unambiguous	[R].DELGIAPER.[F]		1	RecPY14His	RecPY14His	0	2	1	0	1	1	500.258	999.508	999.511	-2.2	-0.0011	HCD (High Energy Collision Dissociation)	MS2	0	2.361	22.7685	5655	PY14_257_109481_P14_A725_20201216_1.raw	F1		36	1	13	13	5.03501e-05	19473537024	23.02
		FALSE	High	Mascot (A5)	Unambiguous	[R].DELGIAPER.[F]		1	RecPY14His	RecPY14His	0	2	1	0	1	1	500.258	999.508	999.511	-2.2	-0.0011	HCD (High Energy Collision Dissociation)	MS2	41.5939	104.788	24.452	7252	PY14_273_109186_PY14-20_A725-20200724_3.raw	F2		28	1	13	13	0.000354813	4809799680	22.54
		FALSE	High	Sequest HT (A3)	Unambiguous	[R].DELGIAPER.[F]		1	RecPY14His	RecPY14His	0	2	1	0	1	1	500.259	999.511	999.511	0.06	3e-05	HCD (High Energy Collision Dissociation)	MS2	2.27108	2.434	22.5847	6499	PY14_273_109186_PY14-20_A725-20200724_3.raw	F2	2		1				4809799680	22.54
		FALSE	High	Sequest HT (A3)	Unambiguous	[R].DELGIAPER.[F]		1	RecPY14His	RecPY14His	0	2	1	0	1	1	500.259	999.511	999.511	0.18	9e-05	HCD (High Energy Collision Dissociation)	MS2	1.50233	200	59.3989	17892	PY14_257_109481_P14_A725_20201216_1.raw	F1	2.49		1				1.37784e+06	59.38
		FALSE	High	Mascot (A5)	Unambiguous	[R].DELGIAPER.[F]		1	RecPY14His	RecPY14His	0	2	1	0	1	1	500.258	999.508	999.511	-2.14	-0.00107	HCD (High Energy Collision Dissociation)	MS2	0	66.348	33.1593	10190	PY14_257_109481_P14_A725_20201216_1.raw	F1		38	1	13	13	3.14775e-05	175733088	33.24
		FALSE	High	Sequest HT (A3)	Unambiguous	[R].DELGIAPER.[F]		1	RecPY14His	RecPY14His	0	2	1	0	1	1	500.26	999.512	999.511	1.46	0.00073	HCD (High Energy Collision Dissociation)	MS2	0	22.959	28.3638	8166	PY14_257_109481_P14_A725_20201216_1.raw	F1	2.77		1				182171392	28.44
		FALSE	High	Mascot (A5)	Unambiguous	[R].DELGIAPER.[F]		1	RecPY14His	RecPY14His	0	2	1	0	1	1	500.258	999.508	999.511	-2.63	-0.00131	HCD (High Energy Collision Dissociation)	MS2	0	2.249	20.3045	5540	PY14_273_109186_PY14-20_A725-20200724_3.raw	F2		42	1	13	13	1.31522e-05	9036815360	20.44
		FALSE	High	Mascot (A5)	Unambiguous	[R].DELGIAPER.[F]		1	RecPY14His	RecPY14His	0	2	1	0	1	1	500.257	999.508	999.511	-2.87	-0.00144	HCD (High Energy Collision Dissociation)	MS2	0	23.004	23.9724	6171	PY14_257_109481_P14_A725_20201216_1.raw	F1		37	1	13	13	4.32514e-05	4709830144	24.43
		FALSE	High	Mascot (A5)	Unambiguous	[R].DELGIAPER.[F]		1	RecPY14His	RecPY14His	0	2	1	0	1	1	500.257	999.508	999.511	-3	-0.0015	HCD (High Energy Collision Dissociation)	MS2	21.6858	9.253	25.8514	6968	PY14_257_109481_P14_A725_20201216_1.raw	F1		40	1	13	13	2.06538e-05	4709830144	24.43
		FALSE	High	Mascot (A5)	Unambiguous	[R].DELGIAPER.[F]		1	RecPY14His	RecPY14His	0	2	1	0	1	1	500.257	999.507	999.511	-3.24	-0.00162	HCD (High Energy Collision Dissociation)	MS2	50.4485	121.876	25.0129	7506	PY14_273_109186_PY14-20_A725-20200724_3.raw	F2		33	1	13	13	9.12011e-05	170682656	25.19
		FALSE	Medium	Sequest HT (A3)	Unambiguous	[R].DELGIAPER.[F]		1	RecPY14His	RecPY14His	0	2	1	0	1	1	500.259	999.511	999.511	0.18	9e-05	HCD (High Energy Collision Dissociation)	MS2	2.61336	200	68.9572	19291	PY14_273_109186_PY14-20_A725-20200724_3.raw	F2	1.29		1
		FALSE	High	Sequest HT (A3)	Unambiguous	[R].DELGIAPER.[F]		1	RecPY14His	RecPY14His	0	2	1	0	1	1	500.26	999.513	999.511	2.07	0.00104	HCD (High Energy Collision Dissociation)	MS2	50.633	33.572	45.7738	14631	PY14_257_109481_P14_A725_20201216_1.raw	F1	2.43		1				27887332	45.81
		FALSE	Medium	Sequest HT (A3)	Unambiguous	[R].DELGIAPER.[F]		1	RecPY14His	RecPY14His	0	2	1	0	1	1	500.259	999.511	999.511	0.24	0.00012	HCD (High Energy Collision Dissociation)	MS2	0	200	68.7025	19241	PY14_273_109186_PY14-20_A725-20200724_3.raw	F2	1.41		1
		FALSE	Medium	Sequest HT (A3)	Unambiguous	[R].DELGIAPER.[F]		1	RecPY14His	RecPY14His	0	2	1	0	1	1	500.259	999.511	999.511	0.12	6e-05	HCD (High Energy Collision Dissociation)	MS2	2.85059	200	68.4464	19190	PY14_273_109186_PY14-20_A725-20200724_3.raw	F2	1.58		1
		FALSE	High	Mascot (A5)	Unambiguous	[R].DELGIAPER.[F]		1	RecPY14His	RecPY14His	0	2	1	0	1	1	500.259	999.51	999.511	-0.13	-6e-05	HCD (High Energy Collision Dissociation)	MS2	5.61483	200	62.0132	17911	PY14_273_109186_PY14-20_A725-20200724_3.raw	F2		47	1	13	13	3.79315e-06	85502.4	61.64
		FALSE	Medium	Sequest HT (A3)	Unambiguous	[R].DELGIAPER.[F]		1	RecPY14His	RecPY14His	0	2	1	0	1	1	500.259	999.511	999.511	0.3	0.00015	HCD (High Energy Collision Dissociation)	MS2	0	200	67.9314	19087	PY14_273_109186_PY14-20_A725-20200724_3.raw	F2	1.31		1
		FALSE	High	Mascot (A5)	Unambiguous	[R].DELGIAPER.[F]		1	RecPY14His	RecPY14His	0	2	1	0	1	1	500.258	999.509	999.511	-2.02	-0.00101	HCD (High Energy Collision Dissociation)	MS2	34.8525	0.033	21.2997	5026	PY14_257_109481_P14_A725_20201216_1.raw	F1		43	1	13	13	1.10662e-05	488286715904	21.57
		FALSE	High	Sequest HT (A3)	Unambiguous	[R].DELGIAPER.[F]		1	RecPY14His	RecPY14His	0	2	1	0	1	1	500.26	999.512	999.511	1.58	0.00079	HCD (High Energy Collision Dissociation)	MS2	6.54511	13.535	22.8557	6602	PY14_273_109186_PY14-20_A725-20200724_3.raw	F2	2.5		1				4809799680	22.54
		FALSE	High	Mascot (A5)	Unambiguous	[R].DELGIAPER.[F]		1	RecPY14His	RecPY14His	0	2	1	0	1	1	500.258	999.509	999.511	-2.02	-0.00101	HCD (High Energy Collision Dissociation)	MS2	4.34188	0.18	19.2348	5129	PY14_273_109186_PY14-20_A725-20200724_3.raw	F2		42	1	13	13	1.40929e-05	380120563712	18.77
		FALSE	High	Sequest HT (A3)	Unambiguous	[R].DELGIAPER.[F]		1	RecPY14His	RecPY14His	0	2	1	0	1	1	500.259	999.511	999.511	0.3	0.00015	HCD (High Energy Collision Dissociation)	MS2	1.59312	200	59.142	17837	PY14_257_109481_P14_A725_20201216_1.raw	F1	2.64		1				1.37784e+06	59.38
		FALSE	High	Sequest HT (A3)	Unambiguous	[R].DELGIAPER.[F]		1	RecPY14His	RecPY14His	0	2	1	0	1	1	500.259	999.511	999.511	0.18	9e-05	HCD (High Energy Collision Dissociation)	MS2	1.07561	200	60.1692	18057	PY14_257_109481_P14_A725_20201216_1.raw	F1	2.28		1				676941	60.08
		FALSE	High	Mascot (A5)	Unambiguous	[R].DELGIAPER.[F]		1	RecPY14His	RecPY14His	0	2	1	0	1	1	500.257	999.506	999.511	-4.34	-0.00217	HCD (High Energy Collision Dissociation)	MS2	20.002	16.247	27.2748	7661	PY14_257_109481_P14_A725_20201216_1.raw	F1		35	1	13	13	6.91831e-05	331083072	27.37
		FALSE	High	Mascot (A5)	Unambiguous	[R].DELGIAPER.[F]		1	RecPY14His	RecPY14His	0	2	1	0	1	1	500.257	999.506	999.511	-4.16	-0.00208	HCD (High Energy Collision Dissociation)	MS2	58.6031	21.097	26.7312	7391	PY14_257_109481_P14_A725_20201216_1.raw	F1		31	1	13	13	0.000149624	345573888	27.12
		FALSE	High	Mascot (A5)	Unambiguous	[R].DELGIAPER.[F]		1	RecPY14His	RecPY14His	0	2	1	0	1	1	500.257	999.506	999.511	-4.1	-0.00205	HCD (High Energy Collision Dissociation)	MS2	10.0212	26.096	27.0057	7531	PY14_257_109481_P14_A725_20201216_1.raw	F1		34	1	13	13	7.60326e-05	345573888	27.12
		FALSE	High	Mascot (A5)	Unambiguous	[R].DELGIAPER.[F]		1	RecPY14His	RecPY14His	0	2	1	0	1	1	500.257	999.507	999.511	-3.85	-0.00192	HCD (High Energy Collision Dissociation)	MS2	11.0384	30.798	29.1526	8519	PY14_257_109481_P14_A725_20201216_1.raw	F1		34	1	13	13	8.01678e-05	256720320	29.27
		FALSE	High	Mascot (A5)	Unambiguous	[R].DELGIAPER.[F]		1	RecPY14His	RecPY14His	0	2	1	0	1	1	500.257	999.507	999.511	-3.55	-0.00177	HCD (High Energy Collision Dissociation)	MS2	14.1322	19.732	27.8151	7914	PY14_257_109481_P14_A725_20201216_1.raw	F1		40	1	13	13	2.10378e-05	488042976	27.93
		FALSE	High	Mascot (A5)	Unambiguous	[R].DELGIAPER.[F]		1	RecPY14His	RecPY14His	0	2	1	0	1	1	500.258	999.508	999.511	-2.14	-0.00107	HCD (High Energy Collision Dissociation)	MS2	56.8721	95.563	25.5059	7727	PY14_273_109186_PY14-20_A725-20200724_3.raw	F2		35	1	13	13	6.96627e-05	197063696	25.84
		FALSE	Medium	Sequest HT (A3)	Unambiguous	[R].DELGIAPER.[F]		1	RecPY14His	RecPY14His	0	2	1	0	1	1	500.259	999.51	999.511	-0.13	-6e-05	HCD (High Energy Collision Dissociation)	MS2	0	200	69.2106	19339	PY14_273_109186_PY14-20_A725-20200724_3.raw	F2	1.89		1
		FALSE	High	Sequest HT (A3)	Unambiguous	[R].DELGIAPER.[F]		1	RecPY14His	RecPY14His	0	2	1	0	1	1	500.259	999.511	999.511	0.3	0.00015	HCD (High Energy Collision Dissociation)	MS2	0.935392	200	59.9112	18002	PY14_257_109481_P14_A725_20201216_1.raw	F1	2.42		1				1.58955e+06	59.67
		FALSE	High	Sequest HT (A3)	Unambiguous	[R].DELGIAPER.[F]		1	RecPY14His	RecPY14His	0	2	1	0	1	1	500.258	999.509	999.511	-2.02	-0.00101	HCD (High Energy Collision Dissociation)	MS2	4.34188	0.18	19.2348	5129	PY14_273_109186_PY14-20_A725-20200724_3.raw	F2	2.41		1				380120563712	18.77
		FALSE	High	Sequest HT (A3)	Unambiguous	[R].DELGIAPER.[F]		1	RecPY14His	RecPY14His	0	2	1	0	1	1	500.259	999.511	999.511	0.06	3e-05	HCD (High Energy Collision Dissociation)	MS2	0.0438138	0.03	21.6944	5180	PY14_257_109481_P14_A725_20201216_1.raw	F1	2.61		1				488286715904	21.57
		FALSE	High	Mascot (A5)	Unambiguous	[R].DELGIAPER.[F]		1	RecPY14His	RecPY14His	0	2	1	0	1	1	500.261	999.515	999.511	4.15	0.00207	HCD (High Energy Collision Dissociation)	MS2	19.8558	35.708	32.3302	9865	PY14_257_109481_P14_A725_20201216_1.raw	F1		35	1	13	13	6.87068e-05	108576392	32.32
		FALSE	High	Mascot (A5)	Unambiguous	[R].DELGIAPER.[F]		1	RecPY14His	RecPY14His	0	2	1	0	1	1	500.261	999.514	999.511	3.66	0.00183	HCD (High Energy Collision Dissociation)	MS2	15.4915	76.258	32.048	9740	PY14_257_109481_P14_A725_20201216_1.raw	F1		38	1	13	13	2.85759e-05	108576392	32.32
		FALSE	High	Mascot (A5)	Unambiguous	[R].DELGIAPER.[F]		1	RecPY14His	RecPY14His	0	2	1	0	1	1	500.261	999.514	999.511	3.29	0.00165	HCD (High Energy Collision Dissociation)	MS2	26.3674	63.748	41.96	13466	PY14_257_109481_P14_A725_20201216_1.raw	F1		35	1	13	13	6.69885e-05	98171832	41.8
		FALSE	High	Mascot (A5)	Unambiguous	[R].DELGIAPER.[F]		1	RecPY14His	RecPY14His	0	2	1	0	1	1	500.26	999.513	999.511	2.87	0.00143	HCD (High Energy Collision Dissociation)	MS2	41.4203	23.522	44.1032	14125	PY14_257_109481_P14_A725_20201216_1.raw	F1		38	1	13	13	3.39625e-05	67038072	44.05
		FALSE	High	Mascot (A5)	Unambiguous	[R].DELGIAPER.[F]		1	RecPY14His	RecPY14His	0	2	1	0	1	1	500.26	999.513	999.511	2.8	0.0014	HCD (High Energy Collision Dissociation)	MS2	13.8864	93.59	31.7653	9618	PY14_257_109481_P14_A725_20201216_1.raw	F1		39	1	13	13	2.43781e-05	374680000	31.13
		FALSE	High	Sequest HT (A3)	Unambiguous	[R].DELGIAPER.[F]		1	RecPY14His	RecPY14His	0	2	1	0	1	1	500.257	999.508	999.511	-3	-0.0015	HCD (High Energy Collision Dissociation)	MS2	21.6858	9.253	25.8514	6968	PY14_257_109481_P14_A725_20201216_1.raw	F1	2.23		1				4709830144	24.43
		FALSE	High	Sequest HT (A3)	Unambiguous	[R].DELGIAPER.[F]		1	RecPY14His	RecPY14His	0	2	1	0	1	1	500.258	999.509	999.511	-1.84	-0.00092	HCD (High Energy Collision Dissociation)	MS2	0.138355	0.099	23.0524	5786	PY14_257_109481_P14_A725_20201216_1.raw	F1	2.61		1				19473537024	23.02
		FALSE	High	Sequest HT (A3)	Unambiguous	[R].DELGIAPER.[F]		1	RecPY14His	RecPY14His	0	2	1	0	1	1	500.259	999.511	999.511	0.36	0.00018	HCD (High Energy Collision Dissociation)	MS2	1.25147	200	65.8635	19238	PY14_257_109481_P14_A725_20201216_1.raw	F1	2.38		1				198558	65.92
		FALSE	High	Sequest HT (A3)	Unambiguous	[R].DELGIAPER.[F]		1	RecPY14His	RecPY14His	0	2	1	0	1	1	500.26	999.512	999.511	1.77	0.00088	HCD (High Energy Collision Dissociation)	MS2	35.8335	52.155	47.4557	15106	PY14_257_109481_P14_A725_20201216_1.raw	F1	2.08		1				21693048	47.47
		FALSE	High	Sequest HT (A3)	Unambiguous	[R].DELGIAPER.[F]		1	RecPY14His	RecPY14His	0	2	1	0	1	1	500.259	999.511	999.511	0.48	0.00024	HCD (High Energy Collision Dissociation)	MS2	9.69398	4.796	24.8059	6530	PY14_257_109481_P14_A725_20201216_1.raw	F1	2.66		1				4709830144	24.43
		FALSE	High	Sequest HT (A3)	Unambiguous	[R].DELGIAPER.[F]		1	RecPY14His	RecPY14His	0	2	1	0	1	1	500.259	999.511	999.511	0.42	0.00021	HCD (High Energy Collision Dissociation)	MS2	1.64616	200	68.4316	19760	PY14_257_109481_P14_A725_20201216_1.raw	F1	2.53		1				111884	68.16
		FALSE	High	Sequest HT (A3)	Unambiguous	[R].DELGIAPER.[F]		1	RecPY14His	RecPY14His	0	2	1	0	1	1	500.259	999.511	999.511	0.42	0.00021	HCD (High Energy Collision Dissociation)	MS2	0	200	68.6875	19812	PY14_257_109481_P14_A725_20201216_1.raw	F1	2.41		1				233020	68.82
		FALSE	High	Sequest HT (A3)	Unambiguous	[R].DELGIAPER.[F]		1	RecPY14His	RecPY14His	0	2	1	0	1	1	500.259	999.511	999.511	0.36	0.00018	HCD (High Energy Collision Dissociation)	MS2	1.54498	200	68.1727	19708	PY14_257_109481_P14_A725_20201216_1.raw	F1	2.45		1				111884	68.16
		FALSE	High	Sequest HT (A3)	Unambiguous	[R].DELGIAPER.[F]		1	RecPY14His	RecPY14His	0	2	1	0	1	1	500.259	999.511	999.511	0.36	0.00018	HCD (High Energy Collision Dissociation)	MS2	5.25231	200	68.9427	19863	PY14_257_109481_P14_A725_20201216_1.raw	F1	2.41		1				475364	69.19
		FALSE	High	Sequest HT (A3)	Unambiguous	[R].DELGIAPER.[F]		1	RecPY14His	RecPY14His	0	2	1	0	1	1	500.259	999.511	999.511	0.24	0.00012	HCD (High Energy Collision Dissociation)	MS2	0.170453	0.03	21.7021	5183	PY14_257_109481_P14_A725_20201216_1.raw	F1	2.26		1				488286715904	21.57
		FALSE	High	Sequest HT (A3)	Unambiguous	[R].DELGIAPER.[F]		1	RecPY14His	RecPY14His	0	2	1	0	1	1	500.258	999.509	999.511	-1.65	-0.00083	HCD (High Energy Collision Dissociation)	MS2	0.163507	0.13	21.9788	5296	PY14_257_109481_P14_A725_20201216_1.raw	F1	2.31		1				488286715904	21.57
		FALSE	High	Sequest HT (A3)	Unambiguous	[R].DELGIAPER.[F]		1	RecPY14His	RecPY14His	0	2	1	0	1	1	500.259	999.511	999.511	0.24	0.00012	HCD (High Energy Collision Dissociation)	MS2	1.04938	200	63.8045	18816	PY14_257_109481_P14_A725_20201216_1.raw	F1	2.4		1				196982	63.55
		FALSE	High	Sequest HT (A3)	Unambiguous	[R].DELGIAPER.[F]		1	RecPY14His	RecPY14His	0	2	1	0	1	1	500.259	999.511	999.511	0.3	0.00015	HCD (High Energy Collision Dissociation)	MS2	1.16212	116.492	52.5724	16318	PY14_257_109481_P14_A725_20201216_1.raw	F1	2.26		1				226771872	51.73
		FALSE	High	Mascot (A5)	Unambiguous	[R].DELGIAPER.[F]		1	RecPY14His	RecPY14His	0	2	1	0	1	1	500.259	999.511	999.511	0.61	0.0003	HCD (High Energy Collision Dissociation)	MS2	16.9409	182.366	39.1402	12555	PY14_257_109481_P14_A725_20201216_1.raw	F1		35	1	13	13	6.56145e-05	94004008	39
		FALSE	High	Sequest HT (A3)	Unambiguous	[R].DELGIAPER.[F]		1	RecPY14His	RecPY14His	0	2	1	0	1	1	500.259	999.511	999.511	0.36	0.00018	HCD (High Energy Collision Dissociation)	MS2	2.11816	200	65.6119	19186	PY14_257_109481_P14_A725_20201216_1.raw	F1	2.61		1				198558	65.92
		FALSE	High	Sequest HT (A3)	Unambiguous	[R].DELGIAPER.[F]		1	RecPY14His	RecPY14His	0	2	1	0	1	1	500.259	999.511	999.511	0.12	6e-05	HCD (High Energy Collision Dissociation)	MS2	1.2672	200	65.353	19132	PY14_257_109481_P14_A725_20201216_1.raw	F1	2.37		1				110566	65.71
		FALSE	High	Sequest HT (A3)	Unambiguous	[R].DELGIAPER.[F]		1	RecPY14His	RecPY14His	0	2	1	0	1	1	500.258	999.508	999.511	-2.2	-0.0011	HCD (High Energy Collision Dissociation)	MS2	0	2.361	22.7685	5655	PY14_257_109481_P14_A725_20201216_1.raw	F1	2.84		1				19473537024	23.02
		FALSE	High	Sequest HT (A3)	Unambiguous	[R].DELGIAPER.[F]		1	RecPY14His	RecPY14His	0	2	1	0	1	1	500.257	999.506	999.511	-4.4	-0.0022	HCD (High Energy Collision Dissociation)	MS2	55.2775	90.49	26.175	7123	PY14_257_109481_P14_A725_20201216_1.raw	F1	2.49		1				66768816	26.28
		FALSE	High	Sequest HT (A3)	Unambiguous	[R].DELGIAPER.[F]		1	RecPY14His	RecPY14His	0	2	1	0	1	1	500.259	999.511	999.511	0.36	0.00018	HCD (High Energy Collision Dissociation)	MS2	1.33446	83.401	52.3063	16249	PY14_257_109481_P14_A725_20201216_1.raw	F1	2.46		1				226771872	51.73
		FALSE	High	Sequest HT (A3)	Unambiguous	[R].DELGIAPER.[F]		1	RecPY14His	RecPY14His	0	2	1	0	1	1	500.259	999.511	999.511	0.3	0.00015	HCD (High Energy Collision Dissociation)	MS2	1.21185	200	65.0941	19080	PY14_257_109481_P14_A725_20201216_1.raw	F1	2.49		1				359795	65.09
		FALSE	High	Mascot (A5)	Unambiguous	[R].DELGIAPER.[F]		1	RecPY14His	RecPY14His	0	2	1	0	1	1	500.259	999.511	999.511	0.61	0.0003	HCD (High Energy Collision Dissociation)	MS2	17.7812	77.101	40.2748	12931	PY14_257_109481_P14_A725_20201216_1.raw	F1		34	1	13	13	7.87046e-05	75457856	40.12
		FALSE	High	Sequest HT (A3)	Unambiguous	[R].DELGIAPER.[F]		1	RecPY14His	RecPY14His	0	2	1	0	1	1	500.259	999.511	999.511	0.85	0.00042	HCD (High Energy Collision Dissociation)	MS2	33.2283	68.756	47.1231	15014	PY14_257_109481_P14_A725_20201216_1.raw	F1	1.93		1				43062820	47.21
		FALSE	High	Sequest HT (A3)	Unambiguous	[R].DELGIAPER.[F]		1	RecPY14His	RecPY14His	0	2	1	0	1	1	500.259	999.511	999.511	0.36	0.00018	HCD (High Energy Collision Dissociation)	MS2	1.34278	200	64.8391	19028	PY14_257_109481_P14_A725_20201216_1.raw	F1	2.42		1				387844	64.78
		FALSE	High	Sequest HT (A3)	Unambiguous	[R].DELGIAPER.[F]		1	RecPY14His	RecPY14His	0	2	1	0	1	1	500.259	999.511	999.511	0.24	0.00012	HCD (High Energy Collision Dissociation)	MS2	1.33874	200	64.5788	18974	PY14_257_109481_P14_A725_20201216_1.raw	F1	2.34		1				387844	64.78
		FALSE	High	Sequest HT (A3)	Unambiguous	[R].DELGIAPER.[F]		1	RecPY14His	RecPY14His	0	2	1	0	1	1	500.257	999.506	999.511	-4.16	-0.00208	HCD (High Energy Collision Dissociation)	MS2	58.6031	21.097	26.7312	7391	PY14_257_109481_P14_A725_20201216_1.raw	F1	2.58		1				345573888	27.12
		FALSE	High	Sequest HT (A3)	Unambiguous	[R].DELGIAPER.[F]		1	RecPY14His	RecPY14His	0	2	1	0	1	1	500.259	999.511	999.511	0.42	0.00021	HCD (High Energy Collision Dissociation)	MS2	1.49114	200	64.3219	18922	PY14_257_109481_P14_A725_20201216_1.raw	F1	2.37		1				387844	64.78
		FALSE	High	Sequest HT (A3)	Unambiguous	[R].DELGIAPER.[F]		1	RecPY14His	RecPY14His	0	2	1	0	1	1	500.259	999.51	999.511	-0.43	-0.00022	HCD (High Energy Collision Dissociation)	MS2	0.404097	0.147	22.2459	5406	PY14_257_109481_P14_A725_20201216_1.raw	F1	2.59		1				488286715904	21.57
		FALSE	High	Sequest HT (A3)	Unambiguous	[R].DELGIAPER.[F]		1	RecPY14His	RecPY14His	0	2	1	0	1	1	500.259	999.51	999.511	-0.62	-0.00031	HCD (High Energy Collision Dissociation)	MS2	51.2489	83.292	46.8658	14944	PY14_257_109481_P14_A725_20201216_1.raw	F1	2.18		1				69870792	46.65
		FALSE	High	Sequest HT (A3)	Unambiguous	[R].DELGIAPER.[F]		1	RecPY14His	RecPY14His	0	2	1	0	1	1	500.259	999.511	999.511	0.24	0.00012	HCD (High Energy Collision Dissociation)	MS2	1.24323	200	64.0635	18869	PY14_257_109481_P14_A725_20201216_1.raw	F1	2.38		1
		FALSE	High	Sequest HT (A3)	Unambiguous	[R].DELGIAPER.[F]		1	RecPY14His	RecPY14His	0	2	1	0	1	1	500.258	999.508	999.511	-2.26	-0.00113	HCD (High Energy Collision Dissociation)	MS2	0	2.005	22.5093	5538	PY14_257_109481_P14_A725_20201216_1.raw	F1	2.65		1				488286715904	21.57
		FALSE	Medium	Sequest HT (A3)	Unambiguous	[R].DELGIAPER.[F]		1	RecPY14His	RecPY14His	0	2	1	0	1	1	500.259	999.511	999.511	0.67	0.00033	HCD (High Energy Collision Dissociation)	MS2	3.09384	200	69.4697	19389	PY14_273_109186_PY14-20_A725-20200724_3.raw	F2	1.43		1
		FALSE	Medium	Sequest HT (A3)	Unambiguous	[R].DELGIAPER.[F]		1	RecPY14His	RecPY14His	0	2	1	0	1	1	500.259	999.511	999.511	0.18	9e-05	HCD (High Energy Collision Dissociation)	MS2	6.60113	200	69.7285	19440	PY14_273_109186_PY14-20_A725-20200724_3.raw	F2	1.37		1
		FALSE	High	Sequest HT (A3)	Unambiguous	[R].DELGIAPER.[F]		1	RecPY14His	RecPY14His	0	2	1	0	1	1	500.259	999.511	999.511	0.24	0.00012	HCD (High Energy Collision Dissociation)	MS2	1.51573	84.413	53.105	16456	PY14_257_109481_P14_A725_20201216_1.raw	F1	2.5		1				290801728	53.78
		FALSE	High	Sequest HT (A3)	Unambiguous	[R].DELGIAPER.[F]		1	RecPY14His	RecPY14His	0	2	1	0	1	1	500.257	999.506	999.511	-4.4	-0.0022	HCD (High Energy Collision Dissociation)	MS2	9.03728	26.611	27.5542	7792	PY14_257_109481_P14_A725_20201216_1.raw	F1	2.42		1				331083072	27.37
		FALSE	High	Sequest HT (A3)	Unambiguous	[R].DELGIAPER.[F]		1	RecPY14His	RecPY14His	0	2	1	0	1	1	500.259	999.51	999.511	-0.07	-3e-05	HCD (High Energy Collision Dissociation)	MS2	6.11446	6.092	21.1648	5918	PY14_273_109186_PY14-20_A725-20200724_3.raw	F2	2.2		1				9036815360	20.44
		FALSE	High	Sequest HT (A3)	Unambiguous	[R].DELGIAPER.[F]		1	RecPY14His	RecPY14His	0	2	1	0	1	1	500.259	999.511	999.511	0.36	0.00018	HCD (High Energy Collision Dissociation)	MS2	1.377	200	61.2061	18278	PY14_257_109481_P14_A725_20201216_1.raw	F1	2.54		1				587693	60.81
		FALSE	High	Sequest HT (A3)	Unambiguous	[R].DELGIAPER.[F]		1	RecPY14His	RecPY14His	0	2	1	0	1	1	500.259	999.511	999.511	0.24	0.00012	HCD (High Energy Collision Dissociation)	MS2	0	200	60.9456	18222	PY14_257_109481_P14_A725_20201216_1.raw	F1	2.35		1				448542	60.93
		FALSE	High	Sequest HT (A3)	Unambiguous	[R].DELGIAPER.[F]		1	RecPY14His	RecPY14His	0	2	1	0	1	1	500.259	999.511	999.511	0.24	0.00012	HCD (High Energy Collision Dissociation)	MS2	1.03205	200	60.6861	18168	PY14_257_109481_P14_A725_20201216_1.raw	F1	2.69		1				587693	60.81
		FALSE	High	Sequest HT (A3)	Unambiguous	[R].DELGIAPER.[F]		1	RecPY14His	RecPY14His	0	2	1	0	1	1	500.258	999.509	999.511	-1.78	-0.00089	HCD (High Energy Collision Dissociation)	MS2	62.7975	14.239	21.4267	6028	PY14_273_109186_PY14-20_A725-20200724_3.raw	F2	2.24		1				9036815360	20.44
		FALSE	High	Sequest HT (A3)	Unambiguous	[R].DELGIAPER.[F]		1	RecPY14His	RecPY14His	0	2	1	0	1	1	500.257	999.506	999.511	-4.34	-0.00217	HCD (High Energy Collision Dissociation)	MS2	20.002	16.247	27.2748	7661	PY14_257_109481_P14_A725_20201216_1.raw	F1	2.63		1				331083072	27.37
		FALSE	High	Mascot (A5)	Unambiguous	[R].DELGIAPER.[F]		1	RecPY14His	RecPY14His	0	2	1	0	1	1	500.259	999.511	999.511	0.48	0.00024	HCD (High Energy Collision Dissociation)	MS2	16.9964	149.441	42.9745	13467	PY14_273_109186_PY14-20_A725-20200724_3.raw	F2		40	1	13	13	1.87068e-05	21500962	42.87
		FALSE	High	Mascot (A5)	Unambiguous	[R].DELGIAPER.[F]		1	RecPY14His	RecPY14His	0	2	1	0	1	1	500.259	999.511	999.511	0.48	0.00024	HCD (High Energy Collision Dissociation)	MS2	14.5105	10.13	22.2908	6392	PY14_273_109186_PY14-20_A725-20200724_3.raw	F2		44	1	13	13	8.72971e-06	4809799680	22.54
		FALSE	High	Sequest HT (A3)	Unambiguous	[R].DELGIAPER.[F]		1	RecPY14His	RecPY14His	0	2	1	0	1	1	500.258	999.508	999.511	-2.63	-0.00131	HCD (High Energy Collision Dissociation)	MS2	0	2.249	20.3045	5540	PY14_273_109186_PY14-20_A725-20200724_3.raw	F2	2.35		1				9036815360	20.44
		FALSE	High	Mascot (A5)	Unambiguous	[R].DELGIAPER.[F]		1	RecPY14His	RecPY14His	0	2	1	0	1	1	500.259	999.511	999.511	0.61	0.0003	HCD (High Energy Collision Dissociation)	MS2	28.2414	200	44.1264	13772	PY14_273_109186_PY14-20_A725-20200724_3.raw	F2		33	1	13	13	9.37562e-05	81564488	43.27
		FALSE	High	Mascot (A5)	Unambiguous	[R].DELGIAPER.[F]		1	RecPY14His	RecPY14His	0	2	1	0	1	1	500.259	999.511	999.511	0.61	0.0003	HCD (High Energy Collision Dissociation)	MS2	22.0248	145.815	40.9476	12930	PY14_273_109186_PY14-20_A725-20200724_3.raw	F2		40	1	13	13	2.03236e-05	115922720	40.67
		FALSE	High	Mascot (A5)	Unambiguous	[R].DELGIAPER.[F]		1	RecPY14His	RecPY14His	0	2	1	0	1	1	500.259	999.511	999.511	0.61	0.0003	HCD (High Energy Collision Dissociation)	MS2	14.3926	161.294	40.3909	12777	PY14_273_109186_PY14-20_A725-20200724_3.raw	F2		42	1	13	13	1.22744e-05	115922720	40.67
		FALSE	High	Sequest HT (A3)	Unambiguous	[R].DELGIAPER.[F]		1	RecPY14His	RecPY14His	0	2	1	0	1	1	500.257	999.506	999.511	-4.1	-0.00205	HCD (High Energy Collision Dissociation)	MS2	10.0212	26.096	27.0057	7531	PY14_257_109481_P14_A725_20201216_1.raw	F1	2.38		1				345573888	27.12
		FALSE	High	Sequest HT (A3)	Unambiguous	[R].DELGIAPER.[F]		1	RecPY14His	RecPY14His	0	2	1	0	1	1	500.258	999.51	999.511	-0.98	-0.00049	HCD (High Energy Collision Dissociation)	MS2	0.386743	0.554	19.5083	5232	PY14_273_109186_PY14-20_A725-20200724_3.raw	F2	2.35		1				380120563712	18.77
		FALSE	High	Sequest HT (A3)	Unambiguous	[R].DELGIAPER.[F]		1	RecPY14His	RecPY14His	0	2	1	0	1	1	500.259	999.511	999.511	0.12	6e-05	HCD (High Energy Collision Dissociation)	MS2	0	200	61.4667	18332	PY14_257_109481_P14_A725_20201216_1.raw	F1	2.52		1				478316	61.91
		FALSE	High	Sequest HT (A3)	Unambiguous	[R].DELGIAPER.[F]		1	RecPY14His	RecPY14His	0	2	1	0	1	1	500.259	999.511	999.511	0.18	9e-05	HCD (High Energy Collision Dissociation)	MS2	1.10092	200	61.7371	18387	PY14_257_109481_P14_A725_20201216_1.raw	F1	2.5		1				478316	61.91
		FALSE	High	Sequest HT (A3)	Unambiguous	[R].DELGIAPER.[F]		1	RecPY14His	RecPY14His	0	2	1	0	1	1	500.259	999.511	999.511	0.24	0.00012	HCD (High Energy Collision Dissociation)	MS2	1.01838	200	61.9963	18442	PY14_257_109481_P14_A725_20201216_1.raw	F1	2.21		1				478316	61.91
		FALSE	High	Sequest HT (A3)	Unambiguous	[R].DELGIAPER.[F]		1	RecPY14His	RecPY14His	0	2	1	0	1	1	500.259	999.511	999.511	0.24	0.00012	HCD (High Energy Collision Dissociation)	MS2	0	200	62.2527	18494	PY14_257_109481_P14_A725_20201216_1.raw	F1	2.17		1				232160	62.18
		FALSE	High	Mascot (A5)	Unambiguous	[R].DELGIAPER.[F]		1	RecPY14His	RecPY14His	0	2	1	0	1	1	500.259	999.51	999.511	-0.13	-6e-05	HCD (High Energy Collision Dissociation)	MS2	6.31177	200	68.1899	19137	PY14_273_109186_PY14-20_A725-20200724_3.raw	F2		20	1	13	13	0.00199067	256405	68.07
		FALSE	High	Mascot (A5)	Unambiguous	[R].DELGIAPER.[F]		1	RecPY14His	RecPY14His	0	2	1	0	1	1	500.259	999.511	999.511	0.48	0.00024	HCD (High Energy Collision Dissociation)	MS2	47.4642	200	45.5933	14154	PY14_273_109186_PY14-20_A725-20200724_3.raw	F2		36	1	13	13	4.96592e-05	28592424	45.22
		FALSE	High	Mascot (A5)	Unambiguous	[R].DELGIAPER.[F]		1	RecPY14His	RecPY14His	0	2	1	0	1	1	500.259	999.511	999.511	0.48	0.00024	HCD (High Energy Collision Dissociation)	MS2	0	200	61.4924	17810	PY14_273_109186_PY14-20_A725-20200724_3.raw	F2		47	1	13	13	4.33511e-06	216922	61.38
		FALSE	High	Mascot (A5)	Unambiguous	[R].DELGIAPER.[F]		1	RecPY14His	RecPY14His	0	2	1	0	1	1	500.259	999.511	999.511	0.42	0.00021	HCD (High Energy Collision Dissociation)	MS2	11.9865	114.063	38.1196	12162	PY14_273_109186_PY14-20_A725-20200724_3.raw	F2		39	1	13	13	2.25424e-05	51785052	38.49
		FALSE	High	Mascot (A5)	Unambiguous	[R].DELGIAPER.[F]		1	RecPY14His	RecPY14His	0	2	1	0	1	1	500.259	999.511	999.511	0.42	0.00021	HCD (High Energy Collision Dissociation)	MS2	1.49114	200	64.3219	18922	PY14_257_109481_P14_A725_20201216_1.raw	F1		44	1	13	13	7.62079e-06	387844	64.78
		FALSE	High	Mascot (A5)	Unambiguous	[R].DELGIAPER.[F]		1	RecPY14His	RecPY14His	0	2	1	0	1	1	500.259	999.511	999.511	0.42	0.00021	HCD (High Energy Collision Dissociation)	MS2	1.64616	200	68.4316	19760	PY14_257_109481_P14_A725_20201216_1.raw	F1		43	1	13	13	1.09901e-05	111884	68.16
		FALSE	Medium	Sequest HT (A3)	Unambiguous	[R].DELGIAPER.[F]		1	RecPY14His	RecPY14His	0	2	1	0	1	1	500.258	999.508	999.511	-2.33	-0.00116	HCD (High Energy Collision Dissociation)	MS2	1.04044	0.732	20.5585	5652	PY14_273_109186_PY14-20_A725-20200724_3.raw	F2	1.89		1
		FALSE	High	Mascot (A5)	Unambiguous	[R].DELGIAPER.[F]		1	RecPY14His	RecPY14His	0	2	1	0	1	1	500.259	999.511	999.511	0.57	0.00029	HCD (High Energy Collision Dissociation)	MS2		126.409	45.3269	14083	PY14_273_109186_PY14-20_A725-20200724_3.raw	F2		43	1	13	13	9.52796e-06	28592424	45.22
		FALSE	High	Mascot (A5)	Unambiguous	[R].DELGIAPER.[F]		1	RecPY14His	RecPY14His	0	2	1	0	1	1	500.259	999.511	999.511	0.42	0.00021	HCD (High Energy Collision Dissociation)	MS2	11.6243	162.746	43.2577	13544	PY14_273_109186_PY14-20_A725-20200724_3.raw	F2		45	1	13	13	5.92925e-06	81564488	43.27
		FALSE	High	Mascot (A5)	Unambiguous	[R].DELGIAPER.[F]		1	RecPY14His	RecPY14His	0	2	1	0	1	1	500.259	999.511	999.511	0.42	0.00021	HCD (High Energy Collision Dissociation)	MS2	6.45082	200	55.5937	16588	PY14_273_109186_PY14-20_A725-20200724_3.raw	F2		54	1	13	13	7.16143e-07	5.76451e+06	55.47
		FALSE	High	Mascot (A5)	Unambiguous	[R].DELGIAPER.[F]		1	RecPY14His	RecPY14His	0	2	1	0	1	1	500.259	999.511	999.511	0.42	0.00021	HCD (High Energy Collision Dissociation)	MS2	5.88135	200	67.1634	18937	PY14_273_109186_PY14-20_A725-20200724_3.raw	F2		36	1	13	13	4.67735e-05	108991	67.54
		FALSE	High	Mascot (A5)	Unambiguous	[R].DELGIAPER.[F]		1	RecPY14His	RecPY14His	0	2	1	0	1	1	500.259	999.511	999.511	0.36	0.00018	HCD (High Energy Collision Dissociation)	MS2	27.1944	83.747	38.8646	12458	PY14_257_109481_P14_A725_20201216_1.raw	F1		39	1	13	13	2.74789e-05	94004008	39
		FALSE	High	Mascot (A5)	Unambiguous	[R].DELGIAPER.[F]		1	RecPY14His	RecPY14His	0	2	1	0	1	1	500.259	999.511	999.511	0.36	0.00018	HCD (High Energy Collision Dissociation)	MS2	1.33446	83.401	52.3063	16249	PY14_257_109481_P14_A725_20201216_1.raw	F1		43	1	13	13	1.01391e-05	226771872	51.73
		FALSE	High	Mascot (A5)	Unambiguous	[R].DELGIAPER.[F]		1	RecPY14His	RecPY14His	0	2	1	0	1	1	500.259	999.511	999.511	0.36	0.00018	HCD (High Energy Collision Dissociation)	MS2	0	200	58.8844	17781	PY14_257_109481_P14_A725_20201216_1.raw	F1		44	1	13	13	7.65597e-06	1.52334e+06	58.63
		FALSE	High	Sequest HT (A3)	Unambiguous	[R].DELGIAPER.[F]		1	RecPY14His	RecPY14His	0	2	1	0	1	1	500.258	999.509	999.511	-1.1	-0.00055	HCD (High Energy Collision Dissociation)	MS2	49.9802	42.31	46.0449	14710	PY14_257_109481_P14_A725_20201216_1.raw	F1	2.14		1				74497296	46.33
		FALSE	High	Mascot (A5)	Unambiguous	[R].DELGIAPER.[F]		1	RecPY14His	RecPY14His	0	2	1	0	1	1	500.259	999.511	999.511	0.36	0.00018	HCD (High Energy Collision Dissociation)	MS2	1.377	200	61.2061	18278	PY14_257_109481_P14_A725_20201216_1.raw	F1		44	1	13	13	7.65597e-06	587693	60.81
		FALSE	High	Mascot (A5)	Unambiguous	[R].DELGIAPER.[F]		1	RecPY14His	RecPY14His	0	2	1	0	1	1	500.259	999.511	999.511	0.42	0.00021	HCD (High Energy Collision Dissociation)	MS2	0	200	68.6875	19812	PY14_257_109481_P14_A725_20201216_1.raw	F1		44	1	13	13	7.62079e-06	233020	68.82
		FALSE	High	Mascot (A5)	Unambiguous	[R].DELGIAPER.[F]		1	RecPY14His	RecPY14His	0	2	1	0	1	1	500.259	999.511	999.511	0.54	0.00027	HCD (High Energy Collision Dissociation)	MS2	10.1965	200	55.7762	17089	PY14_257_109481_P14_A725_20201216_1.raw	F1		44	1	13	13	7.74462e-06	3.68833e+06	55.73
		FALSE	High	Mascot (A5)	Unambiguous	[R].DELGIAPER.[F]		1	RecPY14His	RecPY14His	0	2	1	0	1	1	500.259	999.511	999.511	0.54	0.00027	HCD (High Energy Collision Dissociation)	MS2	10.7157	200	33.923	10814	PY14_273_109186_PY14-20_A725-20200724_3.raw	F2		40	1	13	13	1.97242e-05
		FALSE	High	Sequest HT (A3)	Unambiguous	[R].DELGIAPER.[F]		1	RecPY14His	RecPY14His	0	2	1	0	1	1	500.259	999.511	999.511	0.3	0.00015	HCD (High Energy Collision Dissociation)	MS2	0	200	63.0275	18655	PY14_257_109481_P14_A725_20201216_1.raw	F1	2.56		1				191244	62.67
		FALSE	High	Mascot (A5)	Unambiguous	[R].DELGIAPER.[F]		1	RecPY14His	RecPY14His	0	2	1	0	1	1	500.257	999.506	999.511	-4.4	-0.0022	HCD (High Energy Collision Dissociation)	MS2	55.2775	90.49	26.175	7123	PY14_257_109481_P14_A725_20201216_1.raw	F1		38	1	13	13	3.33426e-05	66768816	26.28
		FALSE	High	Sequest HT (A3)	Unambiguous	[R].DELGIAPER.[F]		1	RecPY14His	RecPY14His	0	2	1	0	1	1	500.259	999.511	999.511	0.36	0.00018	HCD (High Energy Collision Dissociation)	MS2	0	200	58.8844	17781	PY14_257_109481_P14_A725_20201216_1.raw	F1	2.56		1				1.52334e+06	58.63
		FALSE	High	Mascot (A5)	Unambiguous	[R].DELGIAPER.[F]		1	RecPY14His	RecPY14His	0	2	1	0	1	1	500.258	999.509	999.511	-1.9	-0.00095	HCD (High Energy Collision Dissociation)	MS2	1.32497	1.866	20.0492	5430	PY14_273_109186_PY14-20_A725-20200724_3.raw	F2		42	1	13	13	1.23595e-05	380120563712	18.77
		FALSE	High	Mascot (A5)	Unambiguous	[R].DELGIAPER.[F]		1	RecPY14His	RecPY14His	0	2	1	0	1	1	500.258	999.509	999.511	-1.9	-0.00095	HCD (High Energy Collision Dissociation)	MS2	8.58573	134.251	33.7222	10410	PY14_257_109481_P14_A725_20201216_1.raw	F1		39	1	13	13	2.32274e-05	219892672	33.98
		FALSE	High	Sequest HT (A3)	Unambiguous	[R].DELGIAPER.[F]		1	RecPY14His	RecPY14His	0	2	1	0	1	1	500.259	999.511	999.511	0.67	0.00033	HCD (High Energy Collision Dissociation)	MS2	5.55813	9.027	23.1329	6712	PY14_273_109186_PY14-20_A725-20200724_3.raw	F2	2.47		1				4809799680	22.54
		FALSE	High	Sequest HT (A3)	Unambiguous	[R].DELGIAPER.[F]		1	RecPY14His	RecPY14His	0	2	1	0	1	1	500.26	999.512	999.511	1.34	0.00067	HCD (High Energy Collision Dissociation)	MS2	8.97682	20.574	28.6222	8288	PY14_257_109481_P14_A725_20201216_1.raw	F1	2.78		1				430810144	29
		FALSE	High	Mascot (A5)	Unambiguous	[R].DELGIAPER.[F]		1	RecPY14His	RecPY14His	0	2	1	0	1	1	500.258	999.509	999.511	-1.84	-0.00092	HCD (High Energy Collision Dissociation)	MS2	0.138355	0.099	23.0524	5786	PY14_257_109481_P14_A725_20201216_1.raw	F1		42	1	13	13	1.34896e-05	19473537024	23.02
		FALSE	High	Sequest HT (A3)	Unambiguous	[R].DELGIAPER.[F]		1	RecPY14His	RecPY14His	0	2	1	0	1	1	500.259	999.511	999.511	0.18	9e-05	HCD (High Energy Collision Dissociation)	MS2	0	200	60.428	18112	PY14_257_109481_P14_A725_20201216_1.raw	F1	2.25		1				587693	60.81
		FALSE	High	Mascot (A5)	Unambiguous	[R].DELGIAPER.[F]		1	RecPY14His	RecPY14His	0	2	1	0	1	1	500.258	999.509	999.511	-1.84	-0.00092	HCD (High Energy Collision Dissociation)	MS2	0	4.712	24.2402	6299	PY14_257_109481_P14_A725_20201216_1.raw	F1		42	1	13	13	1.20781e-05	4709830144	24.43
		FALSE	High	Mascot (A5)	Unambiguous	[R].DELGIAPER.[F]		1	RecPY14His	RecPY14His	0	2	1	0	1	1	500.258	999.509	999.511	-1.78	-0.00089	HCD (High Energy Collision Dissociation)	MS2	62.7975	14.239	21.4267	6028	PY14_273_109186_PY14-20_A725-20200724_3.raw	F2		37	1	13	13	4.2462e-05	9036815360	20.44
		FALSE	High	Sequest HT (A3)	Unambiguous	[R].DELGIAPER.[F]		1	RecPY14His	RecPY14His	0	2	1	0	1	1	500.259	999.511	999.511	0.36	0.00018	HCD (High Energy Collision Dissociation)	MS2	6.30891	13.181	23.4175	6824	PY14_273_109186_PY14-20_A725-20200724_3.raw	F2	2.32		1				4809799680	22.54
		FALSE	High	Mascot (A5)	Unambiguous	[R].DELGIAPER.[F]		1	RecPY14His	RecPY14His	0	2	1	0	1	1	500.258	999.509	999.511	-1.78	-0.00089	HCD (High Energy Collision Dissociation)	MS2	10.9712	6.635	23.6578	6048	PY14_257_109481_P14_A725_20201216_1.raw	F1		27	1	13	13	0.000369828	19473537024	23.02
		FALSE	High	Mascot (A5)	Unambiguous	[R].DELGIAPER.[F]		1	RecPY14His	RecPY14His	0	2	1	0	1	1	500.258	999.509	999.511	-1.65	-0.00083	HCD (High Energy Collision Dissociation)	MS2	0.163507	0.13	21.9788	5296	PY14_257_109481_P14_A725_20201216_1.raw	F1		44	1	13	13	7.11214e-06	488286715904	21.57
		FALSE	High	Sequest HT (A3)	Unambiguous	[R].DELGIAPER.[F]		1	RecPY14His	RecPY14His	0	2	1	0	1	1	500.259	999.511	999.511	0.12	6e-05	HCD (High Energy Collision Dissociation)	MS2	0	200	58.3702	17669	PY14_257_109481_P14_A725_20201216_1.raw	F1	2.57		1				1.52334e+06	58.63
		FALSE	High	Sequest HT (A3)	Unambiguous	[R].DELGIAPER.[F]		1	RecPY14His	RecPY14His	0	2	1	0	1	1	500.258	999.51	999.511	-0.92	-0.00046	HCD (High Energy Collision Dissociation)	MS2	14.1996	19.752	28.8858	8408	PY14_257_109481_P14_A725_20201216_1.raw	F1	2.09		1				430810144	29
		FALSE	Medium	Sequest HT (A3)	Unambiguous	[R].DELGIAPER.[F]		1	RecPY14His	RecPY14His	0	2	1	0	1	1	500.259	999.51	999.511	-0.13	-6e-05	HCD (High Energy Collision Dissociation)	MS2	0	200	69.985	19493	PY14_273_109186_PY14-20_A725-20200724_3.raw	F2	1.31		1
		FALSE	High	Sequest HT (A3)	Unambiguous	[R].DELGIAPER.[F]		1	RecPY14His	RecPY14His	0	2	1	0	1	1	500.259	999.511	999.511	0.24	0.00012	HCD (High Energy Collision Dissociation)	MS2	0.748672	200	58.6285	17725	PY14_257_109481_P14_A725_20201216_1.raw	F1	2.53		1				1.52334e+06	58.63
		FALSE	High	Mascot (A5)	Unambiguous	[R].DELGIAPER.[F]		1	RecPY14His	RecPY14His	0	2	1	0	1	1	500.259	999.511	999.511	0.61	0.0003	HCD (High Energy Collision Dissociation)	MS2	16.7561	172.311	39.5389	12546	PY14_273_109186_PY14-20_A725-20200724_3.raw	F2		43	1	13	13	9.7499e-06	65286876	39.83
		FALSE	High	Mascot (A5)	Unambiguous	[R].DELGIAPER.[F]		1	RecPY14His	RecPY14His	0	2	1	0	1	1	500.259	999.511	999.511	0.48	0.00024	HCD (High Energy Collision Dissociation)	MS2	8.85566	184.23	40.6702	12853	PY14_273_109186_PY14-20_A725-20200724_3.raw	F2		44	1	13	13	8.41395e-06	115922720	40.67
		FALSE	High	Mascot (A5)	Unambiguous	[R].DELGIAPER.[F]		1	RecPY14His	RecPY14His	0	2	1	0	1	1	500.259	999.511	999.511	0.54	0.00027	HCD (High Energy Collision Dissociation)	MS2	8.268	52.332	27.4466	8528	PY14_273_109186_PY14-20_A725-20200724_3.raw	F2		39	1	13	13	2.77971e-05	366863616	27.34
		FALSE	High	Mascot (A5)	Unambiguous	[R].DELGIAPER.[F]		1	RecPY14His	RecPY14His	0	2	1	0	1	1	500.259	999.511	999.511	0.54	0.00027	HCD (High Energy Collision Dissociation)	MS2	22.0052	200	44.9938	13996	PY14_273_109186_PY14-20_A725-20200724_3.raw	F2		38	1	13	13	3.39625e-05	14735688	44.87
		FALSE	High	Sequest HT (A3)	Unambiguous	[R].DELGIAPER.[F]		1	RecPY14His	RecPY14His	0	2	1	0	1	1	500.259	999.51	999.511	-0.25	-0.00012	HCD (High Energy Collision Dissociation)	MS2	4.53605	1.204	19.7862	5331	PY14_273_109186_PY14-20_A725-20200724_3.raw	F2	2.29		1				380120563712	18.77
		FALSE	High	Sequest HT (A3)	Unambiguous	[R].DELGIAPER.[F]		1	RecPY14His	RecPY14His	0	2	1	0	1	1	500.257	999.507	999.511	-3.55	-0.00177	HCD (High Energy Collision Dissociation)	MS2	14.1322	19.732	27.8151	7914	PY14_257_109481_P14_A725_20201216_1.raw	F1	2.49		1				488042976	27.93
		FALSE	High	Mascot (A5)	Unambiguous	[R].DELGIAPER.[F]		1	RecPY14His	RecPY14His	0	2	1	0	1	1	500.259	999.511	999.511	0.54	0.00027	HCD (High Energy Collision Dissociation)	MS2	13.2746	175.848	41.8168	13161	PY14_273_109186_PY14-20_A725-20200724_3.raw	F2		39	1	13	13	2.60016e-05	115922720	40.67
		FALSE	High	Mascot (A5)	Unambiguous	[R].DELGIAPER.[F]		1	RecPY14His	RecPY14His	0	2	1	0	1	1	500.259	999.511	999.511	0.54	0.00027	HCD (High Energy Collision Dissociation)	MS2	17.837	189.488	42.1152	13239	PY14_273_109186_PY14-20_A725-20200724_3.raw	F2		39	1	13	13	2.6485e-05	33751296	42.32
		FALSE	High	Mascot (A5)	Unambiguous	[R].DELGIAPER.[F]		1	RecPY14His	RecPY14His	0	2	1	0	1	1	500.259	999.511	999.511	0.54	0.00027	HCD (High Energy Collision Dissociation)	MS2	20.0975	200	45.8701	14225	PY14_273_109186_PY14-20_A725-20200724_3.raw	F2		48	1	13	13	3.14051e-06	20022784	46.12
		FALSE	High	Mascot (A5)	Unambiguous	[R].DELGIAPER.[F]		1	RecPY14His	RecPY14His	0	2	1	0	1	1	500.259	999.511	999.511	0.54	0.00027	HCD (High Energy Collision Dissociation)	MS2	12.5297	200	40.1086	12702	PY14_273_109186_PY14-20_A725-20200724_3.raw	F2		43	1	13	13	9.03649e-06	65286876	39.83
		FALSE	High	Sequest HT (A3)	Unambiguous	[R].DELGIAPER.[F]		1	RecPY14His	RecPY14His	0	2	1	0	1	1	500.259	999.511	999.511	0.24	0.00012	HCD (High Energy Collision Dissociation)	MS2	2.25721	200	62.7704	18602	PY14_257_109481_P14_A725_20201216_1.raw	F1	2.53		1				191244	62.67
		FALSE	High	Mascot (A5)	Unambiguous	[R].DELGIAPER.[F]		1	RecPY14His	RecPY14His	0	2	1	0	1	1	500.259	999.511	999.511	0.48	0.00024	HCD (High Energy Collision Dissociation)	MS2	3.41472	7.306	25.5957	6858	PY14_257_109481_P14_A725_20201216_1.raw	F1		39	1	13	13	2.24388e-05	4709830144	24.43
		FALSE	High	Sequest HT (A3)	Unambiguous	[R].DELGIAPER.[F]		1	RecPY14His	RecPY14His	0	2	1	0	1	1	500.258	999.509	999.511	-1.9	-0.00095	HCD (High Energy Collision Dissociation)	MS2	1.32497	1.866	20.0492	5430	PY14_273_109186_PY14-20_A725-20200724_3.raw	F2	2.32		1				380120563712	18.77
		FALSE	High	Mascot (A5)	Unambiguous	[R].DELGIAPER.[F]		1	RecPY14His	RecPY14His	0	2	1	0	1	1	500.259	999.511	999.511	0.48	0.00024	HCD (High Energy Collision Dissociation)	MS2	9.69398	4.796	24.8059	6530	PY14_257_109481_P14_A725_20201216_1.raw	F1		41	1	13	13	1.64059e-05	4709830144	24.43
		FALSE	High	Mascot (A5)	Unambiguous	[R].DELGIAPER.[F]		1	RecPY14His	RecPY14His	0	2	1	0	1	1	500.259	999.511	999.511	0.48	0.00024	HCD (High Energy Collision Dissociation)	MS2	12.4093	107.844	33.3516	10617	PY14_273_109186_PY14-20_A725-20200724_3.raw	F2		42	1	13	13	1.39637e-05
		FALSE	High	Mascot (A5)	Unambiguous	[R].DELGIAPER.[F]		1	RecPY14His	RecPY14His	0	2	1	0	1	1	500.259	999.511	999.511	0.48	0.00024	HCD (High Energy Collision Dissociation)	MS2	21.9416	64.712	28.6269	8979	PY14_273_109186_PY14-20_A725-20200724_3.raw	F2		34	1	13	13	8.45279e-05
		FALSE	High	Mascot (A5)	Unambiguous	[R].DELGIAPER.[F]		1	RecPY14His	RecPY14His	0	2	1	0	1	1	500.259	999.511	999.511	0.48	0.00024	HCD (High Energy Collision Dissociation)	MS2	1.56378	200	67.4051	19552	PY14_257_109481_P14_A725_20201216_1.raw	F1		41	1	13	13	1.5417e-05	185724	67.34
		FALSE	High	Sequest HT (A3)	Unambiguous	[R].DELGIAPER.[F]		1	RecPY14His	RecPY14His	0	2	1	0	1	1	500.259	999.511	999.511	0.24	0.00012	HCD (High Energy Collision Dissociation)	MS2	2.12279	200	62.5124	18548	PY14_257_109481_P14_A725_20201216_1.raw	F1	2.16		1				232160	62.18
		FALSE	High	Mascot (A5)	Unambiguous	[R].DELGIAPER.[F]		1	RecPY14His	RecPY14His	0	2	1	0	1	1	500.259	999.511	999.511	0.48	0.00024	HCD (High Energy Collision Dissociation)	MS2	27.6988	51.561	41.6804	13378	PY14_257_109481_P14_A725_20201216_1.raw	F1		36	1	13	13	4.77529e-05	98171832	41.8
		FALSE	High	Sequest HT (A3)	Unambiguous	[R].DELGIAPER.[F]		1	RecPY14His	RecPY14His	0	2	1	0	1	1	500.259	999.512	999.511	1.03	0.00052	HCD (High Energy Collision Dissociation)	MS2	32.0762	36.959	27.1613	8417	PY14_273_109186_PY14-20_A725-20200724_3.raw	F2	2.23		1				366863616	27.34
	FALSE	High	[K].DEIVISSALR.[T]		1	1	29	RecPY14His	RecPY14His [3-12]		0	1102.61	High	High	High	High	3	50
		Checked	Confidence	Identifying Node	PSM Ambiguity	Annotated Sequence	Modifications	# Proteins	Master Protein Accessions	Protein Accessions	# Missed Cleavages	Charge	DeltaScore	DeltaCn	Rank	Search Engine Rank	m/z [Da]	MH+ [Da]	Theo. MH+ [Da]	DeltaM [ppm]	Deltam/z [Da]	Activation Type	MS Order	Isolation Interference [%]	Ion Inject Time [ms]	RT [min]	First Scan	Spectrum File	File ID	XCorr	Ions Score	# Protein Groups	Identity Strict	Identity Relaxed	Expectation Value	Precursor Abundance	Apex RT [min]
		FALSE	High	Sequest HT (A3)	Unambiguous	[K].DEIVISSALR.[T]		1	RecPY14His	RecPY14His	0	2	1	0	1	1	551.81	1102.61	1102.61	2.56	0.00141	HCD (High Energy Collision Dissociation)	MS2	4.29274	15.379	27.9959	7992	PY14_257_109481_P14_A725_20201216_1.raw	F1	3		1				1836512896	28.09
		FALSE	High	Mascot (A5)	Unambiguous	[K].DEIVISSALR.[T]		1	RecPY14His	RecPY14His	0	2	1	0	1	1	551.808	1102.61	1102.61	-1.65	-0.00091	HCD (High Energy Collision Dissociation)	MS2	28.8026	12.472	25.8424	6964	PY14_257_109481_P14_A725_20201216_1.raw	F1		46	1	13	13	5.30884e-06	3448256000	25.95
		FALSE	High	Mascot (A5)	Unambiguous	[K].DEIVISSALR.[T]		1	RecPY14His	RecPY14His	0	2	1	0	1	1	551.808	1102.61	1102.61	-0.76	-0.00042	HCD (High Energy Collision Dissociation)	MS2	3.65051	22.849	26.1922	8022	PY14_273_109186_PY14-20_A725-20200724_3.raw	F2		50	1	13	13	1.90985e-06	652382912	25.98
		FALSE	High	Mascot (A5)	Unambiguous	[K].DEIVISSALR.[T]		1	RecPY14His	RecPY14His	0	2	1	0	1	1	551.807	1102.61	1102.61	-3.42	-0.00189	HCD (High Energy Collision Dissociation)	MS2	0	44.138	26.6101	7335	PY14_257_109481_P14_A725_20201216_1.raw	F1		48	1	13	13	3.4435e-06	325766944	26.7
		FALSE	High	Sequest HT (A3)	Unambiguous	[K].DEIVISSALR.[T]		1	RecPY14His	RecPY14His	0	2	1	0	1	1	551.808	1102.61	1102.61	-0.65	-0.00036	HCD (High Energy Collision Dissociation)	MS2	39.4038	24.32	24.3222	7196	PY14_273_109186_PY14-20_A725-20200724_3.raw	F2	2.44		1				7359590400	23.74
		FALSE	High	Mascot (A5)	Unambiguous	[K].DEIVISSALR.[T]		1	RecPY14His	RecPY14His	0	2	1	0	1	1	551.809	1102.61	1102.61	0.45	0.00025	HCD (High Energy Collision Dissociation)	MS2	49.3461	21.996	23.5714	6889	PY14_273_109186_PY14-20_A725-20200724_3.raw	F2		50	1	13	13	2.0893e-06	7359590400	23.74
		FALSE	Medium	Sequest HT (A3)	Unambiguous	[K].DEIVISSALR.[T]		1	RecPY14His	RecPY14His	0	2	1	0	1	1	551.804	1102.6	1102.61	-9.51	-0.00524	HCD (High Energy Collision Dissociation)	MS2	29.2421	73.021	30.5064	9645	PY14_273_109186_PY14-20_A725-20200724_3.raw	F2	0.84		1
		FALSE	High	Mascot (A5)	Unambiguous	[K].DEIVISSALR.[T]		1	RecPY14His	RecPY14His	0	2	1	0	1	1	551.809	1102.61	1102.61	0.79	0.00043	HCD (High Energy Collision Dissociation)	MS2	52.3263	200	53.2659	16027	PY14_273_109186_PY14-20_A725-20200724_3.raw	F2		40	1	13	13	2.12814e-05	24116670	53
		FALSE	High	Mascot (A5)	Unambiguous	[K].DEIVISSALR.[T]		1	RecPY14His	RecPY14His	0	2	1	0	1	1	551.81	1102.61	1102.61	1.45	0.0008	HCD (High Energy Collision Dissociation)	MS2	7.97261	39.005	28.275	8123	PY14_257_109481_P14_A725_20201216_1.raw	F1		48	1	13	13	3.41193e-06	1836512896	28.09
		FALSE	Medium	Sequest HT (A3)	Unambiguous	[K].DEIVISSALR.[T]		1	RecPY14His	RecPY14His	0	2	1	0	1	1	551.809	1102.61	1102.61	0.01	1e-05	HCD (High Energy Collision Dissociation)	MS2	52.4968	63.777	46.6488	14880	PY14_257_109481_P14_A725_20201216_1.raw	F1	1.87		1
		FALSE	High	Sequest HT (A3)	Unambiguous	[K].DEIVISSALR.[T]		1	RecPY14His	RecPY14His	0	2	1	0	1	1	551.809	1102.61	1102.61	0.45	0.00025	HCD (High Energy Collision Dissociation)	MS2	49.3461	21.996	23.5714	6889	PY14_273_109186_PY14-20_A725-20200724_3.raw	F2	2.58		1				7359590400	23.74
		FALSE	High	Mascot (A5)	Unambiguous	[K].DEIVISSALR.[T]		1	RecPY14His	RecPY14His	0	2	1	0	1	1	551.808	1102.61	1102.61	-0.65	-0.00036	HCD (High Energy Collision Dissociation)	MS2	39.4038	24.32	24.3222	7196	PY14_273_109186_PY14-20_A725-20200724_3.raw	F2		45	1	13	13	5.87489e-06	7359590400	23.74
		FALSE	High	Mascot (A5)	Unambiguous	[K].DEIVISSALR.[T]		1	RecPY14His	RecPY14His	0	2	1	0	1	1	551.81	1102.61	1102.61	2.56	0.00141	HCD (High Energy Collision Dissociation)	MS2	4.29274	15.379	27.9959	7992	PY14_257_109481_P14_A725_20201216_1.raw	F1		48	1	13	13	3.3266e-06	1836512896	28.09
		FALSE	High	Sequest HT (A3)	Unambiguous	[K].DEIVISSALR.[T]		1	RecPY14His	RecPY14His	0	2	1	0	1	1	551.809	1102.61	1102.61	-0.21	-0.00012	HCD (High Energy Collision Dissociation)	MS2	0	11.112	25.9238	7913	PY14_273_109186_PY14-20_A725-20200724_3.raw	F2	2.52		1				652382912	25.98
		FALSE	High	Mascot (A5)	Unambiguous	[K].DEIVISSALR.[T]		1	RecPY14His	RecPY14His	0	2	1	0	1	1	551.809	1102.61	1102.61	-0.1	-5e-05	HCD (High Energy Collision Dissociation)	MS2	12.0618	0.531	23.8322	6994	PY14_273_109186_PY14-20_A725-20200724_3.raw	F2		46	1	13	13	4.94311e-06	7359590400	23.74
		FALSE	High	Sequest HT (A3)	Unambiguous	[K].DEIVISSALR.[T]		1	RecPY14His	RecPY14His	0	2	1	0	1	1	551.809	1102.61	1102.61	-0.1	-5e-05	HCD (High Energy Collision Dissociation)	MS2	12.0618	0.531	23.8322	6994	PY14_273_109186_PY14-20_A725-20200724_3.raw	F2	2.21		1				7359590400	23.74
		FALSE	High	Mascot (A5)	Unambiguous	[K].DEIVISSALR.[T]		1	RecPY14His	RecPY14His	0	2	1	0	1	1	551.809	1102.61	1102.61	0.01	1e-05	HCD (High Energy Collision Dissociation)	MS2	52.4968	63.777	46.6488	14880	PY14_257_109481_P14_A725_20201216_1.raw	F1		22	1	13	13	0.0013366	9325565	46.64
		FALSE	High	Mascot (A5)	Unambiguous	[K].DEIVISSALR.[T]		1	RecPY14His	RecPY14His	0	2	1	0	1	1	551.807	1102.61	1102.61	-3.86	-0.00213	HCD (High Energy Collision Dissociation)	MS2	1.3222	2.296	26.1022	7091	PY14_257_109481_P14_A725_20201216_1.raw	F1		48	1	13	13	3.20627e-06	3448256000	25.95
		FALSE	Medium	Sequest HT (A3)	Unambiguous	[K].DEIVISSALR.[T]		1	RecPY14His	RecPY14His	0	2	1	0	1	1	551.809	1102.61	1102.61	0.79	0.00043	HCD (High Energy Collision Dissociation)	MS2	52.3263	200	53.2659	16027	PY14_273_109186_PY14-20_A725-20200724_3.raw	F2	1.7		1
		FALSE	Medium	Sequest HT (A3)	Selected	[K].DEIVISSALR.[T]		1	RecPY14His	RecPY14His	0	2	1	0	1	1	551.808	1102.61	1102.61	-0.54	-0.0003	HCD (High Energy Collision Dissociation)	MS2	53.1535	200	55.3391	16526	PY14_273_109186_PY14-20_A725-20200724_3.raw	F2	0.98		1
		FALSE	High	Sequest HT (A3)	Unambiguous	[K].DEIVISSALR.[T]		1	RecPY14His	RecPY14His	0	2	1	0	1	1	551.808	1102.61	1102.61	-1.65	-0.00091	HCD (High Energy Collision Dissociation)	MS2	28.8026	12.472	25.8424	6964	PY14_257_109481_P14_A725_20201216_1.raw	F1	2.58		1				3448256000	25.95
		FALSE	High	Sequest HT (A3)	Unambiguous	[K].DEIVISSALR.[T]		1	RecPY14His	RecPY14His	0	2	1	0	1	1	551.807	1102.61	1102.61	-3.86	-0.00213	HCD (High Energy Collision Dissociation)	MS2	1.3222	2.296	26.1022	7091	PY14_257_109481_P14_A725_20201216_1.raw	F1	2.53		1				3448256000	25.95
		FALSE	High	Sequest HT (A3)	Unambiguous	[K].DEIVISSALR.[T]		1	RecPY14His	RecPY14His	0	2	1	0	1	1	551.81	1102.61	1102.61	1.45	0.0008	HCD (High Energy Collision Dissociation)	MS2	7.97261	39.005	28.275	8123	PY14_257_109481_P14_A725_20201216_1.raw	F1	2.98		1				1836512896	28.09
		FALSE	High	Sequest HT (A3)	Unambiguous	[K].DEIVISSALR.[T]		1	RecPY14His	RecPY14His	0	2	1	0	1	1	551.807	1102.61	1102.61	-3.42	-0.00189	HCD (High Energy Collision Dissociation)	MS2	0	44.138	26.6101	7335	PY14_257_109481_P14_A725_20201216_1.raw	F1	2.84		1				325766944	26.7
		FALSE	High	Mascot (A5)	Unambiguous	[K].DEIVISSALR.[T]		1	RecPY14His	RecPY14His	0	2	1	0	1	1	551.807	1102.61	1102.61	-3.53	-0.00195	HCD (High Energy Collision Dissociation)	MS2	0	51.253	26.8776	7465	PY14_257_109481_P14_A725_20201216_1.raw	F1		50	1	13	13	1.94984e-06	325766944	26.7
		FALSE	Medium	Sequest HT (A3)	Selected	[K].DEIVISSALR.[T]		1	RecPY14His	RecPY14His	0	2	1	0	1	1	551.809	1102.61	1102.61	0.45	0.00025	HCD (High Energy Collision Dissociation)	MS2	58.8802	200	53.6262	16117	PY14_273_109186_PY14-20_A725-20200724_3.raw	F2	0.98		1
		FALSE	High	Sequest HT (A3)	Unambiguous	[K].DEIVISSALR.[T]		1	RecPY14His	RecPY14His	0	2	1	0	1	1	551.807	1102.61	1102.61	-3.53	-0.00195	HCD (High Energy Collision Dissociation)	MS2	0	51.253	26.8776	7465	PY14_257_109481_P14_A725_20201216_1.raw	F1	2.5		1				325766944	26.7
		FALSE	High	Mascot (A5)	Unambiguous	[K].DEIVISSALR.[T]		1	RecPY14His	RecPY14His	0	2	1	0	1	1	551.809	1102.61	1102.61	-0.21	-0.00012	HCD (High Energy Collision Dissociation)	MS2	0	11.112	25.9238	7913	PY14_273_109186_PY14-20_A725-20200724_3.raw	F2		48	1	13	13	3.4435e-06	652382912	25.98
		FALSE	High	Sequest HT (A3)	Unambiguous	[K].DEIVISSALR.[T]		1	RecPY14His	RecPY14His	0	2	1	0	1	1	551.808	1102.61	1102.61	-0.76	-0.00042	HCD (High Energy Collision Dissociation)	MS2	3.65051	22.849	26.1922	8022	PY14_273_109186_PY14-20_A725-20200724_3.raw	F2	2.12		1				652382912	25.98
	FALSE	High	[R].DGLNDAFSDQHSGWHTEDLVAK.[Y]		1	1	493	RecPY14His	RecPY14His [147-168]		0	2442.1	High	High	High	High	6.89	100
		Checked	Confidence	Identifying Node	PSM Ambiguity	Annotated Sequence	Modifications	# Proteins	Master Protein Accessions	Protein Accessions	# Missed Cleavages	Charge	DeltaScore	DeltaCn	Rank	Search Engine Rank	m/z [Da]	MH+ [Da]	Theo. MH+ [Da]	DeltaM [ppm]	Deltam/z [Da]	Activation Type	MS Order	Isolation Interference [%]	Ion Inject Time [ms]	RT [min]	First Scan	Spectrum File	File ID	XCorr	Ions Score	# Protein Groups	Identity Strict	Identity Relaxed	Expectation Value	Precursor Abundance	Apex RT [min]
		FALSE	High	Mascot (A5)	Unambiguous	[R].DGLNDAFSDQHSGWHTEDLVAK.[Y]		1	RecPY14His	RecPY14His	0	4	1	0	1	1	611.279	2442.1	2442.1	0.08	5e-05	HCD (High Energy Collision Dissociation)	MS2	14.0766	98.743	28.1778	8808	PY14_273_109186_PY14-20_A725-20200724_3.raw	F2		24	1	13	13	0.000805378	1292129024	26.94
		FALSE	High	Mascot (A5)	Unambiguous	[R].DGLNDAFSDQHSGWHTEDLVAK.[Y]		1	RecPY14His	RecPY14His	0	3	1	0	1	1	814.701	2442.09	2442.1	-3.12	-0.00254	HCD (High Energy Collision Dissociation)	MS2	0	200	43.9726	14083	PY14_257_109481_P14_A725_20201216_1.raw	F1		34	1	13	13	7.11214e-05	46195060	44.24
		FALSE	High	Sequest HT (A3)	Unambiguous	[R].DGLNDAFSDQHSGWHTEDLVAK.[Y]		1	RecPY14His	RecPY14His	0	4	1	0	1	1	611.28	2442.1	2442.1	1.78	0.00109	HCD (High Energy Collision Dissociation)	MS2	25.3663	170.065	39.1784	12567	PY14_257_109481_P14_A725_20201216_1.raw	F1	5.13		1
		FALSE	High	Mascot (A5)	Unambiguous	[R].DGLNDAFSDQHSGWHTEDLVAK.[Y]		1	RecPY14His	RecPY14His	0	3	1	0	1	1	814.701	2442.09	2442.1	-3.04	-0.00248	HCD (High Energy Collision Dissociation)	MS2	0	200	44.2801	14187	PY14_257_109481_P14_A725_20201216_1.raw	F1		38	1	13	13	3.38065e-05	46195060	44.24
		FALSE	High	Mascot (A5)	Unambiguous	[R].DGLNDAFSDQHSGWHTEDLVAK.[Y]		1	RecPY14His	RecPY14His	0	4	1	0	1	1	611.278	2442.09	2442.1	-2.92	-0.00178	HCD (High Energy Collision Dissociation)	MS2	0.55422	0.046	26.278	7172	PY14_257_109481_P14_A725_20201216_1.raw	F1		42	1	13	13	1.25893e-05	226090745856	26.41
		FALSE	High	Mascot (A5)	Unambiguous	[R].DGLNDAFSDQHSGWHTEDLVAK.[Y]		1	RecPY14His	RecPY14His	0	3	1	0	1	1	814.701	2442.09	2442.1	-2.89	-0.00235	HCD (High Energy Collision Dissociation)	MS2	37.796	96.94	29.9216	8857	PY14_257_109481_P14_A725_20201216_1.raw	F1		32	1	13	13	0.00011246
		FALSE	High	Sequest HT (A3)	Unambiguous	[R].DGLNDAFSDQHSGWHTEDLVAK.[Y]		1	RecPY14His	RecPY14His	0	4	1	0	1	1	611.281	2442.1	2442.1	1.98	0.00121	HCD (High Energy Collision Dissociation)	MS2	5.68974	200	36.532	11696	PY14_273_109186_PY14-20_A725-20200724_3.raw	F2	2.81		1				58259992	36.83
		FALSE	High	Mascot (A5)	Unambiguous	[R].DGLNDAFSDQHSGWHTEDLVAK.[Y]		1	RecPY14His	RecPY14His	0	4	1	0	1	1	611.278	2442.09	2442.1	-2.82	-0.00172	HCD (High Energy Collision Dissociation)	MS2	0.608871	0.161	24.6147	7324	PY14_273_109186_PY14-20_A725-20200724_3.raw	F2		26	1	13	13	0.000460257	110026588160	24.79
		FALSE	High	Mascot (A5)	Unambiguous	[R].DGLNDAFSDQHSGWHTEDLVAK.[Y]		1	RecPY14His	RecPY14His	0	5	1	0	1	1	489.224	2442.09	2442.1	-2.7	-0.00132	HCD (High Energy Collision Dissociation)	MS2	27.378	114.802	25.3579	7663	PY14_273_109186_PY14-20_A725-20200724_3.raw	F2		28	1	13	13	0.000340408	104478256	25.44
		FALSE	Medium	Sequest HT (A3)	Selected	[R].DGLNDAFSDQHSGWHTEDLVAK.[Y]		1	RecPY14His	RecPY14His	0	4	1	0	1	1	611.28	2442.1	2442.1	0.98	0.0006	HCD (High Energy Collision Dissociation)	MS2	11.2883	200	42.2889	13284	PY14_273_109186_PY14-20_A725-20200724_3.raw	F2	2.01		1
		FALSE	Medium	Sequest HT (A3)	Unambiguous	[R].DGLNDAFSDQHSGWHTEDLVAK.[Y]		1	RecPY14His	RecPY14His	0	3	1	0	1	1	814.703	2442.1	2442.1	0.03	3e-05	HCD (High Energy Collision Dissociation)	MS2	4.92636	200	42.2967	13286	PY14_273_109186_PY14-20_A725-20200724_3.raw	F2	1.62		1
		FALSE	High	Mascot (A5)	Unambiguous	[R].DGLNDAFSDQHSGWHTEDLVAK.[Y]		1	RecPY14His	RecPY14His	0	3	1	0	1	1	814.701	2442.09	2442.1	-2.59	-0.00211	HCD (High Energy Collision Dissociation)	MS2	7.65158	200	38.0072	12130	PY14_273_109186_PY14-20_A725-20200724_3.raw	F2		16	1	13	13	0.00484172
		FALSE	High	Mascot (A5)	Unambiguous	[R].DGLNDAFSDQHSGWHTEDLVAK.[Y]		1	RecPY14His	RecPY14His	0	3	1	0	1	1	814.701	2442.09	2442.1	-2.59	-0.00211	HCD (High Energy Collision Dissociation)	MS2	0.731164	0.477	25.0304	7514	PY14_273_109186_PY14-20_A725-20200724_3.raw	F2		53	1	13	13	8.93305e-07	71238025216	24.8
		FALSE	High	Mascot (A5)	Unambiguous	[R].DGLNDAFSDQHSGWHTEDLVAK.[Y]		1	RecPY14His	RecPY14His	0	3	1	0	1	1	814.701	2442.09	2442.1	-2.59	-0.00211	HCD (High Energy Collision Dissociation)	MS2	5.52246	200	30.9813	9809	PY14_273_109186_PY14-20_A725-20200724_3.raw	F2		47	1	13	13	4.1115e-06	103615048	31.43
		FALSE	High	Mascot (A5)	Unambiguous	[R].DGLNDAFSDQHSGWHTEDLVAK.[Y]		1	RecPY14His	RecPY14His	0	3	1	0	1	1	814.701	2442.09	2442.1	-2.59	-0.00211	HCD (High Energy Collision Dissociation)	MS2	0	200	45.1518	14446	PY14_257_109481_P14_A725_20201216_1.raw	F1		53	1	13	13	1.10662e-06	56854660	44.88
		FALSE	High	Sequest HT (A3)	Unambiguous	[R].DGLNDAFSDQHSGWHTEDLVAK.[Y]		1	RecPY14His	RecPY14His	0	4	1	0	1	1	611.279	2442.09	2442.1	-0.52	-0.00032	HCD (High Energy Collision Dissociation)	MS2	12.2681	173.765	39.4709	12667	PY14_257_109481_P14_A725_20201216_1.raw	F1	4.82		1				76029040	40.11
		FALSE	High	Mascot (A5)	Unambiguous	[R].DGLNDAFSDQHSGWHTEDLVAK.[Y]		1	RecPY14His	RecPY14His	0	2	1	0	1	1	1221.55	2442.09	2442.1	-2.46	-0.003	HCD (High Energy Collision Dissociation)	MS2	0	200	25.4238	6789	PY14_257_109481_P14_A725_20201216_1.raw	F1		88	1	13	13	2.93089e-10	19193106	25.48
		FALSE	High	Mascot (A5)	Unambiguous	[R].DGLNDAFSDQHSGWHTEDLVAK.[Y]		1	RecPY14His	RecPY14His	0	2	1	0	1	1	1221.55	2442.09	2442.1	-2.46	-0.003	HCD (High Energy Collision Dissociation)	MS2	0	28.132	25.2001	7592	PY14_273_109186_PY14-20_A725-20200724_3.raw	F2		96	1	13	13	5.22396e-11	3055019008	25.4
		FALSE	High	Mascot (A5)	Unambiguous	[R].DGLNDAFSDQHSGWHTEDLVAK.[Y]		1	RecPY14His	RecPY14His	0	4	1	0	1	1	611.279	2442.1	2442.1	0.08	5e-05	HCD (High Energy Collision Dissociation)	MS2	11.4376	200	37.9602	12117	PY14_273_109186_PY14-20_A725-20200724_3.raw	F2		25	1	13	13	0.000651628	63998340	37.78
		FALSE	High	Sequest HT (A3)	Unambiguous	[R].DGLNDAFSDQHSGWHTEDLVAK.[Y]		1	RecPY14His	RecPY14His	0	3	1	0	1	1	814.703	2442.09	2442.1	-0.42	-0.00034	HCD (High Energy Collision Dissociation)	MS2	0	200	33.7856	10766	PY14_273_109186_PY14-20_A725-20200724_3.raw	F2	3.39		1
		FALSE	High	Sequest HT (A3)	Unambiguous	[R].DGLNDAFSDQHSGWHTEDLVAK.[Y]		1	RecPY14His	RecPY14His	0	3	1	0	1	1	814.702	2442.09	2442.1	-1.77	-0.00144	HCD (High Energy Collision Dissociation)	MS2	9.53303	140.418	28.2325	8830	PY14_273_109186_PY14-20_A725-20200724_3.raw	F2	4.59		1				299738432	28.35
		FALSE	High	Sequest HT (A3)	Unambiguous	[R].DGLNDAFSDQHSGWHTEDLVAK.[Y]		1	RecPY14His	RecPY14His	0	3	1	0	1	1	814.699	2442.08	2442.1	-5.07	-0.00412	HCD (High Energy Collision Dissociation)	MS2	0.755604	0.121	26.2793	7173	PY14_257_109481_P14_A725_20201216_1.raw	F1	6.21		1				145934516224	26.46
		FALSE	High	Sequest HT (A3)	Unambiguous	[R].DGLNDAFSDQHSGWHTEDLVAK.[Y]		1	RecPY14His	RecPY14His	0	3	1	0	1	1	814.702	2442.09	2442.1	-1.54	-0.00125	HCD (High Energy Collision Dissociation)	MS2	0	140.968	32.717	10009	PY14_257_109481_P14_A725_20201216_1.raw	F1	5.63		1
		FALSE	High	Mascot (A5)	Unambiguous	[R].DGLNDAFSDQHSGWHTEDLVAK.[Y]		1	RecPY14His	RecPY14His	0	3	1	0	1	1	814.707	2442.11	2442.1	4.01	0.00326	HCD (High Energy Collision Dissociation)	MS2	14.7981	190.641	35.648	11156	PY14_257_109481_P14_A725_20201216_1.raw	F1		32	1	13	13	0.000117761	138990752	35.57
		FALSE	High	Mascot (A5)	Unambiguous	[R].DGLNDAFSDQHSGWHTEDLVAK.[Y]		1	RecPY14His	RecPY14His	0	4	1	0	1	1	611.282	2442.11	2442.1	3.98	0.00243	HCD (High Energy Collision Dissociation)	MS2	4.58008	103.473	32.3101	9856	PY14_257_109481_P14_A725_20201216_1.raw	F1		39	1	13	13	2.80543e-05	356541408	32.3
		FALSE	High	Sequest HT (A3)	Unambiguous	[R].DGLNDAFSDQHSGWHTEDLVAK.[Y]		1	RecPY14His	RecPY14His	0	4	1	0	1	1	611.279	2442.1	2442.1	0.18	0.00011	HCD (High Energy Collision Dissociation)	MS2	10.0036	76.77	28.4587	8917	PY14_273_109186_PY14-20_A725-20200724_3.raw	F2	4.94		1				1292129024	26.94
		FALSE	High	Mascot (A5)	Unambiguous	[R].DGLNDAFSDQHSGWHTEDLVAK.[Y]		1	RecPY14His	RecPY14His	0	4	1	0	1	1	611.281	2442.1	2442.1	3.48	0.00212	HCD (High Energy Collision Dissociation)	MS2	9.89564	162.014	38.8853	12465	PY14_257_109481_P14_A725_20201216_1.raw	F1		36	1	13	13	5.57186e-05
		FALSE	High	Mascot (A5)	Unambiguous	[R].DGLNDAFSDQHSGWHTEDLVAK.[Y]		1	RecPY14His	RecPY14His	0	4	1	0	1	1	611.281	2442.1	2442.1	3.38	0.00206	HCD (High Energy Collision Dissociation)	MS2	0	97.617	32.0116	9726	PY14_257_109481_P14_A725_20201216_1.raw	F1		41	1	13	13	1.52757e-05	514961504	31.09
		FALSE	High	Sequest HT (A3)	Unambiguous	[R].DGLNDAFSDQHSGWHTEDLVAK.[Y]		1	RecPY14His	RecPY14His	0	4	1	0	1	1	611.278	2442.09	2442.1	-1.92	-0.00117	HCD (High Energy Collision Dissociation)	MS2	24.4613	121.874	44.7411	14324	PY14_257_109481_P14_A725_20201216_1.raw	F1	3.54		1				79060856	44.85
		FALSE	High	Mascot (A5)	Unambiguous	[R].DGLNDAFSDQHSGWHTEDLVAK.[Y]		1	RecPY14His	RecPY14His	0	3	1	0	1	1	814.706	2442.1	2442.1	2.96	0.00241	HCD (High Energy Collision Dissociation)	MS2	22.0413	187.985	32.1296	9779	PY14_257_109481_P14_A725_20201216_1.raw	F1		17	1	13	13	0.00390841	489136992	30.9
		FALSE	High	Sequest HT (A3)	Unambiguous	[R].DGLNDAFSDQHSGWHTEDLVAK.[Y]		1	RecPY14His	RecPY14His	0	3	1	0	1	1	814.703	2442.09	2442.1	-0.79	-0.00064	HCD (High Energy Collision Dissociation)	MS2	4.40268	200	43.373	13894	PY14_257_109481_P14_A725_20201216_1.raw	F1	4.71		1
		FALSE	High	Mascot (A5)	Unambiguous	[R].DGLNDAFSDQHSGWHTEDLVAK.[Y]		1	RecPY14His	RecPY14His	0	4	1	0	1	1	611.277	2442.09	2442.1	-3.62	-0.00221	HCD (High Energy Collision Dissociation)	MS2	1.37712	3.984	27.8662	7937	PY14_257_109481_P14_A725_20201216_1.raw	F1		41	1	13	13	1.64816e-05	226090745856	26.41
		FALSE	High	Mascot (A5)	Unambiguous	[R].DGLNDAFSDQHSGWHTEDLVAK.[Y]		1	RecPY14His	RecPY14His	0	3	1	0	1	1	814.701	2442.09	2442.1	-3.49	-0.00284	HCD (High Energy Collision Dissociation)	MS2	0.412204	2.35	24.5058	7275	PY14_273_109186_PY14-20_A725-20200724_3.raw	F2		57	1	13	13	4.32514e-07	71238025216	24.8
		FALSE	Medium	Sequest HT (A3)	Selected	[R].DGLNDAFSDQHSGWHTEDLVAK.[Y]		1	RecPY14His	RecPY14His	0	4	1	0	1	1	611.28	2442.1	2442.1	0.48	0.00029	HCD (High Energy Collision Dissociation)	MS2	13.9573	200	41.9884	13206	PY14_273_109186_PY14-20_A725-20200724_3.raw	F2	1.65		1
		FALSE	High	Mascot (A5)	Unambiguous	[R].DGLNDAFSDQHSGWHTEDLVAK.[Y]		1	RecPY14His	RecPY14His	0	3	1	0	1	1	814.702	2442.09	2442.1	-1.99	-0.00162	HCD (High Energy Collision Dissociation)	MS2	0.484682	0.475	25.2952	7635	PY14_273_109186_PY14-20_A725-20200724_3.raw	F2		56	1	13	13	5.12861e-07	36116533248	25.4
		FALSE	High	Sequest HT (A3)	Unambiguous	[R].DGLNDAFSDQHSGWHTEDLVAK.[Y]		1	RecPY14His	RecPY14His	0	3	1	0	1	1	814.702	2442.09	2442.1	-1.17	-0.00095	HCD (High Energy Collision Dissociation)	MS2	14.1348	200	43.1033	13812	PY14_257_109481_P14_A725_20201216_1.raw	F1	3.66		1				85581912	42.25
		FALSE	High	Mascot (A5)	Unambiguous	[R].DGLNDAFSDQHSGWHTEDLVAK.[Y]		1	RecPY14His	RecPY14His	0	4	1	0	1	1	611.278	2442.09	2442.1	-1.82	-0.00111	HCD (High Energy Collision Dissociation)	MS2	21.3949	113.479	46.4239	14816	PY14_257_109481_P14_A725_20201216_1.raw	F1		24	1	13	13	0.000792501	26602398	46.33
		FALSE	Medium	Sequest HT (A3)	Selected	[R].DGLNDAFSDQHSGWHTEDLVAK.[Y]		1	RecPY14His	RecPY14His	0	3	1	0	1	1	814.702	2442.09	2442.1	-1.32	-0.00107	HCD (High Energy Collision Dissociation)	MS2	0	200	43.3128	13560	PY14_273_109186_PY14-20_A725-20200724_3.raw	F2	1.28		1
		FALSE	High	Mascot (A5)	Unambiguous	[R].DGLNDAFSDQHSGWHTEDLVAK.[Y]		1	RecPY14His	RecPY14His	0	3	1	0	1	1	814.702	2442.09	2442.1	-1.77	-0.00144	HCD (High Energy Collision Dissociation)	MS2	0	200	44.8678	14360	PY14_257_109481_P14_A725_20201216_1.raw	F1		47	1	13	13	4.27563e-06	56854660	44.88
		FALSE	High	Sequest HT (A3)	Unambiguous	[R].DGLNDAFSDQHSGWHTEDLVAK.[Y]		1	RecPY14His	RecPY14His	0	4	1	0	1	1	611.277	2442.08	2442.1	-4.42	-0.0027	HCD (High Energy Collision Dissociation)	MS2	7.20373	195.597	35.0556	11182	PY14_273_109186_PY14-20_A725-20200724_3.raw	F2	2.68		1				96139568	35.32
		FALSE	High	Sequest HT (A3)	Unambiguous	[R].DGLNDAFSDQHSGWHTEDLVAK.[Y]		1	RecPY14His	RecPY14His	0	3	1	0	1	1	814.702	2442.09	2442.1	-2.29	-0.00186	HCD (High Energy Collision Dissociation)	MS2	7.91062	200	43.685	13995	PY14_257_109481_P14_A725_20201216_1.raw	F1	4.68		1				46195060	44.24
		FALSE	High	Mascot (A5)	Unambiguous	[R].DGLNDAFSDQHSGWHTEDLVAK.[Y]		1	RecPY14His	RecPY14His	0	4	1	0	1	1	611.278	2442.09	2442.1	-1.82	-0.00111	HCD (High Energy Collision Dissociation)	MS2	28.8576	200	43.4568	13922	PY14_257_109481_P14_A725_20201216_1.raw	F1		23	1	13	13	0.000901571	45912964	43.61
		FALSE	Medium	Sequest HT (A3)	Unambiguous	[R].DGLNDAFSDQHSGWHTEDLVAK.[Y]		1	RecPY14His	RecPY14His	0	4	1	0	1	1	611.28	2442.1	2442.1	0.58	0.00035	HCD (High Energy Collision Dissociation)	MS2	7.25022	200	43.1309	13511	PY14_273_109186_PY14-20_A725-20200724_3.raw	F2	1.85		1
		FALSE	High	Mascot (A5)	Unambiguous	[R].DGLNDAFSDQHSGWHTEDLVAK.[Y]		1	RecPY14His	RecPY14His	0	3	1	0	1	1	814.702	2442.09	2442.1	-1.84	-0.0015	HCD (High Energy Collision Dissociation)	MS2	9.83047	68.617	29.0636	8479	PY14_257_109481_P14_A725_20201216_1.raw	F1		43	1	13	13	1.06905e-05	721705344	28.85
		FALSE	High	Mascot (A5)	Unambiguous	[R].DGLNDAFSDQHSGWHTEDLVAK.[Y]		1	RecPY14His	RecPY14His	0	3	1	0	1	1	814.702	2442.09	2442.1	-1.92	-0.00156	HCD (High Energy Collision Dissociation)	MS2	2.14764	2.493	25.8424	7877	PY14_273_109186_PY14-20_A725-20200724_3.raw	F2		62	1	13	13	1.19124e-07	36116533248	25.4
		FALSE	High	Mascot (A5)	Unambiguous	[R].DGLNDAFSDQHSGWHTEDLVAK.[Y]		1	RecPY14His	RecPY14His	0	4	1	0	1	1	611.278	2442.09	2442.1	-1.92	-0.00117	HCD (High Energy Collision Dissociation)	MS2	24.4613	121.874	44.7411	14324	PY14_257_109481_P14_A725_20201216_1.raw	F1		22	1	13	13	0.00119124	79060856	44.85
		FALSE	High	Sequest HT (A3)	Unambiguous	[R].DGLNDAFSDQHSGWHTEDLVAK.[Y]		1	RecPY14His	RecPY14His	0	3	1	0	1	1	814.698	2442.08	2442.1	-6.86	-0.00559	HCD (High Energy Collision Dissociation)	MS2	23.5585	200	35.2587	11246	PY14_273_109186_PY14-20_A725-20200724_3.raw	F2	2.67		1
		FALSE	High	Mascot (A5)	Unambiguous	[R].DGLNDAFSDQHSGWHTEDLVAK.[Y]		1	RecPY14His	RecPY14His	0	4	1	0	1	1	611.278	2442.09	2442.1	-1.92	-0.00117	HCD (High Energy Collision Dissociation)	MS2	2.21607	0.492	25.1489	7569	PY14_273_109186_PY14-20_A725-20200724_3.raw	F2		31	1	13	13	0.000155597	110026588160	24.79
		FALSE	High	Sequest HT (A3)	Unambiguous	[R].DGLNDAFSDQHSGWHTEDLVAK.[Y]		1	RecPY14His	RecPY14His	0	4	1	0	1	1	611.279	2442.09	2442.1	-1.02	-0.00062	HCD (High Energy Collision Dissociation)	MS2	6.30777	165.97	35.3651	11279	PY14_273_109186_PY14-20_A725-20200724_3.raw	F2	3.19		1				96139568	35.32
		FALSE	Medium	Sequest HT (A3)	Selected	[R].DGLNDAFSDQHSGWHTEDLVAK.[Y]		1	RecPY14His	RecPY14His	0	3	1	0	1	1	814.703	2442.09	2442.1	-0.87	-0.00071	HCD (High Energy Collision Dissociation)	MS2	0	200	43.0018	13475	PY14_273_109186_PY14-20_A725-20200724_3.raw	F2	1.16		1
		FALSE	High	Mascot (A5)	Unambiguous	[R].DGLNDAFSDQHSGWHTEDLVAK.[Y]		1	RecPY14His	RecPY14His	0	3	1	0	1	1	814.702	2442.09	2442.1	-1.92	-0.00156	HCD (High Energy Collision Dissociation)	MS2	7.35042	200	41.2973	13252	PY14_257_109481_P14_A725_20201216_1.raw	F1		35	1	13	13	6.68344e-05	50875980	40.55
		FALSE	Medium	Sequest HT (A3)	Unambiguous	[R].DGLNDAFSDQHSGWHTEDLVAK.[Y]		1	RecPY14His	RecPY14His	0	3	1	0	1	1	814.704	2442.1	2442.1	0.18	0.00015	HCD (High Energy Collision Dissociation)	MS2	0	200	41.9962	13208	PY14_273_109186_PY14-20_A725-20200724_3.raw	F2	1.61		1
		FALSE	High	Mascot (A5)	Unambiguous	[R].DGLNDAFSDQHSGWHTEDLVAK.[Y]		1	RecPY14His	RecPY14His	0	2	1	0	1	1	1221.55	2442.09	2442.1	-3.46	-0.00423	HCD (High Energy Collision Dissociation)	MS2	0	116.928	24.4001	7231	PY14_273_109186_PY14-20_A725-20200724_3.raw	F2		68	1	13	13	3.3037e-08	11935876096	24.8
		FALSE	High	Mascot (A5)	Unambiguous	[R].DGLNDAFSDQHSGWHTEDLVAK.[Y]		1	RecPY14His	RecPY14His	0	2	1	0	1	1	1221.55	2442.09	2442.1	-2.36	-0.00288	HCD (High Energy Collision Dissociation)	MS2	5.60868	2.249	24.6621	7346	PY14_273_109186_PY14-20_A725-20200724_3.raw	F2		100	1	13	13	1.8281e-11	11935876096	24.8
		FALSE	High	Sequest HT (A3)	Unambiguous	[R].DGLNDAFSDQHSGWHTEDLVAK.[Y]		1	RecPY14His	RecPY14His	0	4	1	0	1	1	611.279	2442.1	2442.1	-0.12	-7e-05	HCD (High Energy Collision Dissociation)	MS2	18.4189	200	36.8382	11794	PY14_273_109186_PY14-20_A725-20200724_3.raw	F2	3.72		1				58259992	36.83
		FALSE	High	Sequest HT (A3)	Selected	[R].DGLNDAFSDQHSGWHTEDLVAK.[Y]		1	RecPY14His	RecPY14His	0	4	1	0	1	1	611.278	2442.09	2442.1	-2.22	-0.00136	HCD (High Energy Collision Dissociation)	MS2	41.3184	113.386	43.1763	13835	PY14_257_109481_P14_A725_20201216_1.raw	F1	3.51		1				43698068	43.29
		FALSE	High	Sequest HT (A3)	Unambiguous	[R].DGLNDAFSDQHSGWHTEDLVAK.[Y]		1	RecPY14His	RecPY14His	0	4	1	0	1	1	611.279	2442.09	2442.1	-0.72	-0.00044	HCD (High Energy Collision Dissociation)	MS2	6.58719	114.638	51.7839	16111	PY14_257_109481_P14_A725_20201216_1.raw	F1	5.55		1				65130536	51.78
		FALSE	High	Sequest HT (A3)	Unambiguous	[R].DGLNDAFSDQHSGWHTEDLVAK.[Y]		1	RecPY14His	RecPY14His	0	4	1	0	1	1	611.278	2442.09	2442.1	-2.92	-0.00178	HCD (High Energy Collision Dissociation)	MS2	0.55422	0.046	26.278	7172	PY14_257_109481_P14_A725_20201216_1.raw	F1	5.92		1				226090745856	26.41
		FALSE	High	Mascot (A5)	Unambiguous	[R].DGLNDAFSDQHSGWHTEDLVAK.[Y]		1	RecPY14His	RecPY14His	0	4	1	0	1	1	611.277	2442.09	2442.1	-3.22	-0.00197	HCD (High Energy Collision Dissociation)	MS2	5.76797	3.596	24.341	7203	PY14_273_109186_PY14-20_A725-20200724_3.raw	F2		32	1	13	13	0.000125603	110026588160	24.79
		FALSE	High	Mascot (A5)	Unambiguous	[R].DGLNDAFSDQHSGWHTEDLVAK.[Y]		1	RecPY14His	RecPY14His	0	4	1	0	1	1	611.277	2442.09	2442.1	-3.22	-0.00197	HCD (High Energy Collision Dissociation)	MS2	0.704764	0.113	26.8091	7429	PY14_257_109481_P14_A725_20201216_1.raw	F1		38	1	13	13	3.16228e-05	226090745856	26.41
		FALSE	High	Mascot (A5)	Unambiguous	[R].DGLNDAFSDQHSGWHTEDLVAK.[Y]		1	RecPY14His	RecPY14His	0	3	1	0	1	1	814.701	2442.09	2442.1	-3.19	-0.0026	HCD (High Energy Collision Dissociation)	MS2	19.9759	68.235	30.5497	9130	PY14_257_109481_P14_A725_20201216_1.raw	F1		19	1	13	13	0.0025293	489136992	30.9
		FALSE	High	Mascot (A5)	Unambiguous	[R].DGLNDAFSDQHSGWHTEDLVAK.[Y]		1	RecPY14His	RecPY14His	0	4	1	0	1	1	611.277	2442.09	2442.1	-3.42	-0.00209	HCD (High Energy Collision Dissociation)	MS2	3.30311	40.703	30.5871	9146	PY14_257_109481_P14_A725_20201216_1.raw	F1		45	1	13	13	5.82103e-06	187568080	30.74
		FALSE	High	Sequest HT (A3)	Unambiguous	[R].DGLNDAFSDQHSGWHTEDLVAK.[Y]		1	RecPY14His	RecPY14His	0	4	1	0	1	1	611.281	2442.1	2442.1	3.48	0.00212	HCD (High Energy Collision Dissociation)	MS2	9.89564	162.014	38.8853	12465	PY14_257_109481_P14_A725_20201216_1.raw	F1	5.59		1
		FALSE	High	Sequest HT (A3)	Unambiguous	[R].DGLNDAFSDQHSGWHTEDLVAK.[Y]		1	RecPY14His	RecPY14His	0	4	1	0	1	1	611.279	2442.09	2442.1	-0.52	-0.00032	HCD (High Energy Collision Dissociation)	MS2	12.0469	200	54.0136	16699	PY14_257_109481_P14_A725_20201216_1.raw	F1	4.85		1				117166696	53.56
		FALSE	High	Sequest HT (A3)	Unambiguous	[R].DGLNDAFSDQHSGWHTEDLVAK.[Y]		1	RecPY14His	RecPY14His	0	4	1	0	1	1	611.278	2442.09	2442.1	-1.82	-0.00111	HCD (High Energy Collision Dissociation)	MS2	28.8576	200	43.4568	13922	PY14_257_109481_P14_A725_20201216_1.raw	F1	3.32		1				45912964	43.61
		FALSE	High	Sequest HT (A3)	Unambiguous	[R].DGLNDAFSDQHSGWHTEDLVAK.[Y]		1	RecPY14His	RecPY14His	0	3	1	0	1	1	814.702	2442.09	2442.1	-1.47	-0.00119	HCD (High Energy Collision Dissociation)	MS2	8.98661	200	36.7534	11769	PY14_273_109186_PY14-20_A725-20200724_3.raw	F2	3.36		1
		FALSE	High	Mascot (A5)	Unambiguous	[R].DGLNDAFSDQHSGWHTEDLVAK.[Y]		1	RecPY14His	RecPY14His	0	4	1	0	1	1	611.281	2442.1	2442.1	1.98	0.00121	HCD (High Energy Collision Dissociation)	MS2	5.68974	200	36.532	11696	PY14_273_109186_PY14-20_A725-20200724_3.raw	F2		21	1	13	13	0.00155597	58259992	36.83
		FALSE	High	Mascot (A5)	Unambiguous	[R].DGLNDAFSDQHSGWHTEDLVAK.[Y]		1	RecPY14His	RecPY14His	0	4	1	0	1	1	611.28	2442.1	2442.1	1.78	0.00109	HCD (High Energy Collision Dissociation)	MS2	25.3663	170.065	39.1784	12567	PY14_257_109481_P14_A725_20201216_1.raw	F1		25	1	13	13	0.000669885
[truncated: 7,304 more rows]

## Sheet: Candida albician ERG10L127S
Checked	Master	Accession	Description	Coverage [%]	# Peptides	# PSMs	# Unique Peptides	# AAs	MW [kDa]	calc. pI	Score Mascot: Mascot	Score Sequest HT: Sequest HT	# Peptides (by Search Engine): Mascot	# Peptides (by Search Engine): Sequest HT	Found in Sample: [S1] F1: Sample	Found in Sample: [S2] F2: Sample	# Protein Groups	Modifications
[truncated: 5,893 more rows]

[truncated: 1 more sheets: Human ACAT1]
