# Supplementary material for: Integrated Omics Approach to Unveil Antifungal Bacterial Polyynes as acetyl-CoA Acetyltransferase Inhibitors
Source: Research Square preprint supplement (doi:10.21203/rs.3.rs-1110265/v1), 2021-12-10
Supplement: Supplementary file 2 [file Supplementary Data 1_Transcriptome analysis for different culture medium.xlsx]

## Sheet: RNA-seq analysis
RNA-seq analysis for different culture medium (PDA/YMA)
Feature ID	Experiment - Fold Change (original values)	Experiment - Fold Change (normalized values)	EDGE test: YMA vs PDA, tagwise dispersions - P-value	EDGE test: YMA vs PDA, tagwise dispersions - Fold change	EDGE test: YMA vs PDA, tagwise dispersions - Bonferroni	EDGE test: YMA vs PDA, tagwise dispersions - FDR p-value correction	YMA - YMAA_medium_IY06_341bp_CCGTCC_L001_R1 (paired) trimmed (paired) (GE) - Expression values	YMA - YMAA_medium_IY06_341bp_CCGTCC_L001_R1 (paired) trimmed (paired) (GE) - Normalized expression values	YMA - YMAA_medium_IY06_341bp_CCGTCC_L001_R1 (paired) trimmed (paired) (GE) - Unique gene reads	YMA - YMAA_medium_IY06_341bp_CCGTCC_L001_R1 (paired) trimmed (paired) (GE) - Total gene reads	YMA - YMAA_medium_IY06_341bp_CCGTCC_L001_R1 (paired) trimmed (paired) (GE) - RPKM	YMA - YMAA_medium_IY06_341bp_CCGTCC_L001_R1 (paired) trimmed (paired) (GE) - Chromosome	YMA - YMAA_medium_IY06_341bp_CCGTCC_L001_R1 (paired) trimmed (paired) (GE) - Chromosome region start	YMA - YMAA_medium_IY06_341bp_CCGTCC_L001_R1 (paired) trimmed (paired) (GE) - Chromosome region end	YMA - YMA_LTS16_KH09_350bp_ACAGTG_L001_R1 (paired) trimmed (paired) (GE) - Expression values	YMA - YMA_LTS16_KH09_350bp_ACAGTG_L001_R1 (paired) trimmed (paired) (GE) - Normalized expression values	YMA - YMA_LTS16_KH09_350bp_ACAGTG_L001_R1 (paired) trimmed (paired) (GE) - Unique gene reads	YMA - YMA_LTS16_KH09_350bp_ACAGTG_L001_R1 (paired) trimmed (paired) (GE) - Total gene reads	YMA - YMA_LTS16_KH09_350bp_ACAGTG_L001_R1 (paired) trimmed (paired) (GE) - RPKM	YMA - YMA_LTS16_KH09_350bp_ACAGTG_L001_R1 (paired) trimmed (paired) (GE) - Chromosome	YMA - YMA_LTS16_KH09_350bp_ACAGTG_L001_R1 (paired) trimmed (paired) (GE) - Chromosome region start	YMA - YMA_LTS16_KH09_350bp_ACAGTG_L001_R1 (paired) trimmed (paired) (GE) - Chromosome region end	YMA - Normalized means	YMA - Means	PDA - PDA_B_medium_340bp_GTCCGC_L001_R1 (paired) trimmed (paired) (GE) - Expression values	PDA - PDA_B_medium_340bp_GTCCGC_L001_R1 (paired) trimmed (paired) (GE) - Normalized expression values	PDA - PDA_B_medium_340bp_GTCCGC_L001_R1 (paired) trimmed (paired) (GE) - Unique gene reads	PDA - PDA_B_medium_340bp_GTCCGC_L001_R1 (paired) trimmed (paired) (GE) - Total gene reads	PDA - PDA_B_medium_340bp_GTCCGC_L001_R1 (paired) trimmed (paired) (GE) - RPKM	PDA - PDA_B_medium_340bp_GTCCGC_L001_R1 (paired) trimmed (paired) (GE) - Chromosome	PDA - PDA_B_medium_340bp_GTCCGC_L001_R1 (paired) trimmed (paired) (GE) - Chromosome region start	PDA - PDA_B_medium_340bp_GTCCGC_L001_R1 (paired) trimmed (paired) (GE) - Chromosome region end	PDA - PDA_LTS16_KH11_347bp_CAGATC_L001_R1 (paired) trimmed (paired) (GE) - Expression values	PDA - PDA_LTS16_KH11_347bp_CAGATC_L001_R1 (paired) trimmed (paired) (GE) - Normalized expression values	PDA - PDA_LTS16_KH11_347bp_CAGATC_L001_R1 (paired) trimmed (paired) (GE) - Unique gene reads	PDA - PDA_LTS16_KH11_347bp_CAGATC_L001_R1 (paired) trimmed (paired) (GE) - Total gene reads	PDA - PDA_LTS16_KH11_347bp_CAGATC_L001_R1 (paired) trimmed (paired) (GE) - RPKM	PDA - PDA_LTS16_KH11_347bp_CAGATC_L001_R1 (paired) trimmed (paired) (GE) - Chromosome	PDA - PDA_LTS16_KH11_347bp_CAGATC_L001_R1 (paired) trimmed (paired) (GE) - Chromosome region start	PDA - PDA_LTS16_KH11_347bp_CAGATC_L001_R1 (paired) trimmed (paired) (GE) - Chromosome region end	PDA - Normalized means	PDA - Means
DPH57_23685	514.214	488.377	4.25e-15	509.946	2.3e-11	2.3e-11	1.67071	1.5	13	13	1.67071	CP030092	5496023	5497778	3.46305	3.8	15	15	3.46305	CP030092	5496023	5497778	2.65	2.56688	1456.71	1192.8	12870	12870	1456.71	CP030092	5496023	5497778	1183.15	1395.6	4777	4777	1183.15	CP030092	5496023	5497778	1294.2	1319.93
DPH57_08630	Inf	Inf	2.22e-14	2732.91	1.2e-10	6.01e-11	0	0	0	0	0	CP030092	2041114	2041441	0	0	0	0	0	CP030092	2041114	2041441	0	0	315.883	258.7	520	520	315.883	CP030092	2041114	2041441	361.561	426.5	272	272	361.561	CP030092	2041114	2041441	342.6	338.722
DPH57_24135	Inf	Inf	1.08e-13	2494.42	5.83e-10	1.94e-10	0	0	0	0	0	CP030092	5597644	5597757	0	0	0	0	0	CP030092	5597644	5597757	0	0	330.484	270.6	0	188	330.484	CP030092	5597644	5597757	269.265	317.6	2	70	269.265	CP030092	5597644	5597757	294.1	299.874
DPH57_08270	-879.65	-1040.67	3.01e-13	-642.657	1.63e-09	3.62e-10	233.9	214.6	894	896	233.9	CP030092	1956066	1956930	372.819	409.8	795	795	372.819	CP030092	1956066	1956930	312.2	303.36	0.689728	0.6	3	3	0.689728	CP030092	1956066	1956930	0	0	0	0	0	CP030092	1956066	1956930	0.3	0.344864
DPH57_08265	-712.121	-744.6	3.34e-13	-559.316	1.81e-09	3.62e-10	214.147	196.4	789	789	214.147	CP030092	1955221	1956052	498.792	548.2	1023	1023	498.792	CP030092	1955221	1956052	372.3	356.469	0.478079	0.4	2	2	0.478079	CP030092	1955221	1956052	0.523069	0.6	1	1	0.523069	CP030092	1955221	1956052	0.5	0.500574
DPH57_08280	-283.472	-264.667	7.68e-13	-267.668	4.16e-09	6.94e-10	294.627	270.3	1495	1497	294.627	CP030092	1958550	1959696	331.99	364.9	939	939	331.99	CP030092	1958550	1959696	317.6	313.309	0.693339	0.6	4	4	0.693339	CP030092	1958550	1959696	1.51717	1.8	4	4	1.51717	CP030092	1958550	1959696	1.2	1.10526
DPH57_08275	-946.37	-1181.75	1.33e-12	-646.464	7.18e-09	1.03e-09	222.046	203.7	1586	1586	222.046	CP030092	1956943	1958554	244.716	269	973	973	244.716	CP030092	1956943	1958554	236.35	233.381	0.493213	0.4	4	4	0.493213	CP030092	1956943	1958554	0	0	0	0	0	CP030092	1956943	1958554	0.2	0.246607
DPH57_08235	-385.632	-465.636	1.59e-12	-315.911	8.59e-09	1.07e-09	166.628	152.8	979	1168	166.628	CP030092	1947414	1948995	327.012	359.4	1054	1276	327.012	CP030092	1947414	1948995	256.1	246.82	1.00514	0.8	8	8	1.00514	CP030092	1947414	1948995	0.274934	0.3	1	1	0.274934	CP030092	1947414	1948995	0.55	0.640039
DPH57_08605	Inf	Inf	3.43e-12	735.442	1.86e-08	2.07e-09	0	0	0	0	0	CP030092	2037041	2037569	0	0	0	0	0	CP030092	2037041	2037569	0	0	68.8474	56.4	183	183	68.8474	CP030092	2037041	2037569	120.193	141.8	146	146	120.193	CP030092	2037041	2037569	99.1	94.5202
DPH57_27060	-195.022	-177	5.78e-12	-172.63	3.13e-08	3.13e-09	118.904	109.1	1183	1183	118.904	CP030092	6314260	6316504	142.281	156.4	788	788	142.281	CP030092	6314260	6316504	132.75	130.593	0.177043	0.1	2	2	0.177043	CP030092	6314260	6316504	1.16222	1.4	6	6	1.16222	CP030092	6314260	6316504	0.75	0.669632
DPH57_08610	589.607	758	8.76e-12	325.141	4.75e-08	4.32e-09	0.359723	0.3	1	1	0.359723	CP030092	2037565	2038192	0	0	0	0	0	CP030092	2037565	2038192	0.15	0.179862	63.0458	51.6	199	199	63.0458	CP030092	2037565	2038192	149.05	175.8	215	215	149.05	CP030092	2037565	2038192	113.7	106.048
DPH57_08635	347.569	387.714	1.18e-11	246.836	6.42e-08	5.32e-09	0.744378	0.7	1	1	0.744378	CP030092	2041449	2041752	0	0	0	0	0	CP030092	2041449	2041752	0.35	0.372189	93.7484	76.8	143	143	93.7484	CP030092	2041449	2041752	164.974	194.6	115	115	164.974	CP030092	2041449	2041752	135.7	129.361
DPH57_08615	432.391	511	1.28e-11	291.492	6.92e-08	5.32e-09	0.662398	0.6	2	2	0.662398	CP030092	2038199	2038880	0	0	0	0	0	CP030092	2038199	2038880	0.3	0.331199	86.6323	70.9	296	297	86.6323	CP030092	2038199	2038880	199.782	235.7	313	313	199.782	CP030092	2038199	2038880	153.3	143.207
DPH57_08620	155.195	143.529	1.45e-11	134.726	7.84e-08	5.6e-09	0	0	0	0	0	CP030092	2038879	2039404	1.54353	1.7	2	2	1.54353	CP030092	2038879	2039404	0.85	0.771765	107.077	87.7	283	283	107.077	CP030092	2038879	2039404	132.471	156.3	160	160	132.471	CP030092	2038879	2039404	122	119.774
DPH57_00215	-333.682	-392.6	2.21e-11	-292.702	1.2e-07	7.98e-09	247.221	226.8	365	365	247.221	CP030092	43615	43948	150.877	165.8	124	124	150.877	CP030092	43615	43948	196.3	199.049	1.19304	1	2	2	1.19304	CP030092	43615	43948	0	0	0	0	0	CP030092	43615	43948	0.5	0.596522
DPH57_08240	-129.503	-136.381	2.62e-11	-115.76	1.42e-07	8.89e-09	98.0102	89.9	614	717	98.0102	CP030092	1948610	1950260	178.769	196.5	612	728	178.769	CP030092	1948610	1950260	143.2	138.39	1.0835	0.9	9	9	1.0835	CP030092	1948610	1950260	1.05375	1.2	4	4	1.05375	CP030092	1948610	1950260	1.05	1.06862
DPH57_23705	130.464	123.208	3.02e-11	121.071	1.64e-07	9.62e-09	0.643368	0.6	7	7	0.643368	CP030092	5500657	5503111	1.65109	1.8	10	10	1.65109	CP030092	5500657	5503111	1.2	1.14723	159.059	130.2	1964	1965	159.059	CP030092	5500657	5503111	140.285	165.5	792	792	140.285	CP030092	5500657	5503111	147.85	149.672
DPH57_08260	-135.929	-146.852	3.65e-11	-125.206	1.98e-07	1.1e-08	154.26	141.5	790	792	154.26	CP030092	1953914	1955072	231.979	255	663	663	231.979	CP030092	1953914	1955072	198.25	193.12	1.71539	1.4	10	10	1.71539	CP030092	1953914	1955072	1.12609	1.3	3	3	1.12609	CP030092	1953914	1955072	1.35	1.42074
DPH57_23800	172.05	193.857	5.03e-11	145.486	2.73e-07	1.44e-08	1.57567	1.4	0	7	1.57567	CP030092	5525559	5526561	0	0	0	0	0	CP030092	5525559	5526561	0.7	0.787837	134.014	109.7	2	676	134.014	CP030092	5525559	5526561	137.082	161.7	4	316	137.082	CP030092	5525559	5526561	135.7	135.548
DPH57_08255	-130.597	-136.565	6.33e-11	-121.363	3.43e-07	1.72e-08	147.749	135.5	2034	2034	147.749	CP030092	1950808	1953913	162.462	178.6	1245	1245	162.462	CP030092	1950808	1953913	157.05	155.106	1.53539	1.3	24	24	1.53539	CP030092	1950808	1953913	0.839943	1	6	6	0.839943	CP030092	1950808	1953913	1.15	1.18767
DPH57_08640	135.867	141.5	6.85e-11	123.476	3.71e-07	1.77e-08	2.01606	1.8	8	8	2.01606	CP030092	2041762	2042657	0.905423	1	2	2	0.905423	CP030092	2041762	2042657	1.4	1.46074	199.751	163.6	900	900	199.751	CP030092	2041762	2042657	197.18	232.6	406	406	197.18	CP030092	2041762	2042657	198.1	198.466
DPH57_14175	-156.546	-136.344	7.42e-11	-183.7	4.02e-07	1.83e-08	1567.78	1438.1	6527	6527	1567.78	CP030092	3352756	3353695	601.94	661.6	1395	1395	601.94	CP030092	3352756	3353695	1049.85	1084.86	2.7501	2.3	13	13	2.7501	CP030092	3352756	3353695	11.1098	13.1	24	24	11.1098	CP030092	3352756	3353695	7.7	6.92994
DPH57_23690	364.224	383.2	1.4e-10	314.282	7.56e-07	3.29e-08	1.13483	1	8	8	1.13483	CP030092	5498116	5499706	0	0	0	0	0	CP030092	5498116	5499706	0.5	0.567413	289.217	236.8	2315	2315	289.217	CP030092	5498116	5499706	124.113	146.4	454	454	124.113	CP030092	5498116	5499706	191.6	206.665
DPH57_08625	171.618	190.632	1.74e-10	149.561	9.45e-07	3.94e-08	2.12154	1.9	16	16	2.12154	CP030092	2039414	2041115	0	0	0	0	0	CP030092	2039414	2041115	0.95	1.06077	186.497	152.7	1597	1597	186.497	CP030092	2039414	2041115	177.599	209.5	695	695	177.599	CP030092	2039414	2041115	181.1	182.048
DPH57_08225	-100.978	-108	1.85e-10	-92.6258	1e-06	4.01e-08	114.851	105.4	3648	3648	114.851	CP030092	1940024	1947188	238.163	261.8	4211	4211	238.163	CP030092	1940024	1947188	183.6	176.507	1.85776	1.5	67	67	1.85776	CP030092	1940024	1947188	1.63821	1.9	27	27	1.63821	CP030092	1940024	1947188	1.7	1.74798
DPH57_08245	-145.626	-182.545	2.47e-10	-123.431	1.34e-06	5.14e-08	85.1553	78.1	111	111	85.1553	CP030092	1950261	1950555	111.63	122.7	81	81	111.63	CP030092	1950261	1950555	100.4	98.3928	1.3513	1.1	2	2	1.3513	CP030092	1950261	1950555	0	0	0	0	0	CP030092	1950261	1950555	0.55	0.675652
DPH57_04970	-100.498	-108.325	3.44e-10	-92.1272	1.87e-06	6.77e-08	233.935	214.6	2203	2203	233.935	CP030092	1131601	1133725	593.267	652	3110	3110	593.267	CP030092	1131601	1133725	433.3	413.601	4.95669	4.1	53	53	4.95669	CP030092	1131601	1133725	3.27435	3.9	16	16	3.27435	CP030092	1131601	1133725	4	4.11552
DPH57_00210	-70.539	-74.597	3.5e-10	-67.9636	1.9e-06	6.77e-08	390.834	358.5	2068	2069	390.834	CP030092	42418	43612	583.333	641.1	1719	1719	583.333	CP030092	42418	43612	499.8	487.083	7.9856	6.5	48	48	7.9856	CP030092	42418	43612	5.82473	6.9	16	16	5.82473	CP030092	42418	43612	6.7	6.90516
DPH57_00220	#NAME?	#NAME?	3.93e-10	-1507.03	2.13e-06	7.35e-08	263.754	241.9	214	214	263.754	CP030092	44029	44212	66.4224	73	30	30	66.4224	CP030092	44029	44212	157.45	165.088	0	0	0	0	0	CP030092	44029	44212	0	0	0	0	0	CP030092	44029	44212	0	0
DPH57_17780	58.1541	54.7679	7.2e-10	57.1286	3.9e-06	1.3e-07	1.14588	1.1	6	6	1.14588	CP030092	4156818	4157999	4.11695	4.5	12	12	4.11695	CP030092	4156818	4157999	2.8	2.63141	150.369	123.1	894	894	150.369	CP030092	4156818	4157999	155.686	183.6	423	423	155.686	CP030092	4156818	4157999	153.35	153.028
DPH57_23700	168.164	181	7.91e-10	145.352	4.29e-06	1.38e-07	1.35058	1.2	3	3	1.35058	CP030092	5500104	5500605	0	0	0	0	0	CP030092	5500104	5500605	0.6	0.675289	140.358	114.9	354	354	140.358	CP030092	5500104	5500605	86.7606	102.3	100	100	86.7606	CP030092	5500104	5500605	108.6	113.559
DPH57_04860	88.8183	94.0741	1.09e-09	80.7931	5.9e-06	1.84e-07	6.48122	5.9	35	35	6.48122	CP030092	1104060	1105278	1.99595	2.2	6	6	1.99595	CP030092	1104060	1105278	4.05	4.23858	349.662	286.3	2144	2144	349.662	CP030092	1104060	1105278	403.266	475.7	1130	1130	403.266	CP030092	1104060	1105278	381	376.464
DPH57_17785	71.8531	64.7797	1.58e-09	73.9927	8.58e-06	2.6e-07	0.751822	0.7	2	2	0.751822	CP030092	4157985	4158585	4.72706	5.2	7	7	4.72706	CP030092	4157985	4158585	2.95	2.73944	227.776	186.5	688	688	227.776	CP030092	4157985	4158585	165.899	195.7	229	229	165.899	CP030092	4157985	4158585	191.1	196.838
DPH57_27065	-62.7901	-62.5862	1.81e-09	-62.1749	9.81e-06	2.88e-07	106.952	98.1	542	542	106.952	CP030092	6316513	6317656	75.8599	83.4	214	214	75.8599	CP030092	6316513	6317656	90.75	91.406	1.39032	1.1	8	8	1.39032	CP030092	6316513	6317656	1.52116	1.8	4	4	1.52116	CP030092	6316513	6317656	1.45	1.45574
DPH57_14170	-82.8238	-74.1557	1.91e-09	-97.5847	1.04e-05	2.96e-07	2212.4	2029.4	25276	25278	2212.4	CP030092	3349896	3352473	710.671	781.1	4520	4520	710.671	CP030092	3349896	3352473	1405.25	1461.54	10.3291	8.5	134	134	10.3291	CP030092	3349896	3352473	24.9636	29.4	148	148	24.9636	CP030092	3349896	3352473	18.95	17.6463
DPH57_08250	-57.1186	-49.6	4.15e-09	-52.5804	2.25e-05	6.24e-07	43.3403	39.8	49	49	43.3403	CP030092	1950551	1950806	54.0236	59.4	34	34	54.0236	CP030092	1950551	1950806	49.6	48.6819	0	0	0	0	0	CP030092	1950551	1950806	1.70459	2	1	1	1.70459	CP030092	1950551	1950806	1	0.852295
DPH57_14185	-68.1802	-60.702	4.85e-09	-79.3977	2.63e-05	7.11e-07	898.414	824.1	3573	3573	898.414	CP030092	3354623	3355520	343.745	377.8	761	761	343.745	CP030092	3354623	3355520	600.95	621.08	4.65047	3.8	21	21	4.65047	CP030092	3354623	3355520	13.5683	16	28	28	13.5683	CP030092	3354623	3355520	9.9	9.10939
DPH57_04875	69.8209	75.45	8.23e-09	62.1046	4.46e-05	1.17e-06	7.12449	6.5	38	38	7.12449	CP030092	1106995	1108198	1.34722	1.5	4	4	1.34722	CP030092	1106995	1108198	4	4.23586	260.893	213.6	1580	1580	260.893	CP030092	1106995	1108198	330.61	390	915	915	330.61	CP030092	1106995	1108198	301.8	295.751
DPH57_08220	-56.9401	-58.6706	9.14e-09	-53.0742	4.95e-05	1.26e-06	106.612	97.8	597	597	106.612	CP030092	1938726	1939989	364.755	400.9	1137	1137	364.755	CP030092	1938726	1939989	249.35	235.684	3.46011	2.8	22	22	3.46011	CP030092	1938726	1939989	4.8182	5.7	14	14	4.8182	CP030092	1938726	1939989	4.25	4.13915
DPH57_04990	-96.3367	-92.5526	9.31e-09	-86.3769	5.05e-05	1.26e-06	49.8816	45.8	414	416	49.8816	CP030092	1137316	1139197	278.303	305.9	1292	1292	278.303	CP030092	1137316	1139197	175.85	164.092	0.633626	0.5	6	6	0.633626	CP030092	1137316	1139197	2.77302	3.3	12	12	2.77302	CP030092	1137316	1139197	1.9	1.70332
DPH57_14190	-51.7688	-46.8522	1.19e-08	-58.2284	6.45e-05	1.57e-06	374.898	343.9	1850	1850	374.898	CP030092	3355516	3356629	177.288	194.9	487	487	177.288	CP030092	3355516	3356629	269.4	276.093	2.85559	2.3	16	16	2.85559	CP030092	3355516	3356629	7.81079	9.2	20	20	7.81079	CP030092	3355516	3356629	5.75	5.33319
DPH57_13185	84.3153	78.8571	2.4e-08	81.013	0.00013	3.1e-06	1.48508	1.4	8	8	1.48508	CP030092	3090326	3091541	0.666958	0.7	2	2	0.666958	CP030092	3090326	3091541	1.05	1.07602	134.226	109.9	821	821	134.226	CP030092	3090326	3091541	47.2235	55.7	132	132	47.2235	CP030092	3090326	3091541	82.8	90.7248
DPH57_08285	-31.1588	-30.9061	2.46e-08	-32.2128	0.000134	3.11e-06	289.057	265.2	2526	2526	289.057	CP030092	1959783	1961754	267.651	294.2	1302	1302	267.651	CP030092	1959783	1961754	279.7	278.354	8.16336	6.7	81	81	8.16336	CP030092	1959783	1961754	9.70345	11.4	44	44	9.70345	CP030092	1959783	1961754	9.05	8.9334
DPH57_14195	-30.7048	-28.6226	2.87e-08	-31.2281	0.000156	3.54e-06	76.9306	70.6	88	88	76.9306	CP030092	3356621	3356879	73.8113	81.1	47	47	73.8113	CP030092	3356621	3356879	75.85	75.3709	1.53986	1.3	2	2	1.53986	CP030092	3356621	3356879	3.36954	4	2	2	3.36954	CP030092	3356621	3356879	2.65	2.4547
DPH57_04975	-41.1041	-41.299	3.33e-08	-38.8477	0.00018	4.01e-06	88.5662	81.2	535	536	88.5662	CP030092	1133742	1135107	290.599	319.4	979	979	290.599	CP030092	1133742	1135107	200.3	189.583	3.4926	2.9	24	24	3.4926	CP030092	1133742	1135107	5.73192	6.8	18	18	5.73192	CP030092	1133742	1135107	4.85	4.61226
DPH57_05060	-23.9807	-24.6535	4.56e-08	-23.8159	0.000247	5.37e-06	110.21	101.1	774	774	110.21	CP030092	1157161	1158745	134.547	147.9	526	526	134.547	CP030092	1157161	1158745	124.5	122.379	5.26701	4.3	42	42	5.26701	CP030092	1157161	1158745	4.93944	5.8	18	18	4.93944	CP030092	1157161	1158745	5.05	5.10323
DPH57_04865	56.6957	62.8654	6.85e-08	48.5428	0.000372	7.91e-06	13.2445	12.1	67	68	13.2445	CP030092	1105283	1106441	3.14904	3.5	9	9	3.14904	CP030092	1105283	1106441	7.8	8.19678	320.606	262.5	1869	1869	320.606	CP030092	1105283	1106441	608.839	718.2	1622	1622	608.839	CP030092	1105283	1106441	490.35	464.722
DPH57_08600	26.4222	27.7424	7.22e-08	23.8918	0.000391	8.15e-06	2.54239	2.3	7	7	2.54239	CP030092	2036414	2037035	3.91475	4.3	6	6	3.91475	CP030092	2036414	2037035	3.3	3.22857	50.2202	41.1	157	157	50.2202	CP030092	2036414	2037035	120.392	142	172	172	120.392	CP030092	2036414	2037035	91.55	85.306
DPH57_08230	-26.6422	-23.0435	1.01e-07	-27.1041	0.000549	1.12e-05	47.7508	43.8	47	47	47.7508	CP030092	1947196	1947418	56.5788	62.2	31	31	56.5788	CP030092	1947196	1947418	53	52.1648	0	0	0	0	0	CP030092	1947196	1947418	3.91595	4.6	2	2	3.91595	CP030092	1947196	1947418	2.3	1.95798
DPH57_18380	-52.2204	-56.0429	1.5e-07	-51.9027	0.000813	1.63e-05	3413.68	3131.4	3360	3360	3413.68	CP030092	4288298	4288520	1551.35	1705.1	850	850	1551.35	CP030092	4288298	4288520	2418.25	2482.51	71.5826	58.6	79	80	71.5826	CP030092	4288298	4288520	23.4957	27.7	12	12	23.4957	CP030092	4288298	4288520	43.15	47.5391
DPH57_20560	34.2531	33.7619	1.58e-07	29.9717	0.000856	1.68e-05	1.06641	1	4	4	1.06641	CP030092	4781964	4782810	0.957865	1.1	2	2	0.957865	CP030092	4781964	4782810	1.05	1.01214	30.2893	24.8	128	129	30.2893	CP030092	4781964	4782810	39.0484	46.1	76	76	39.0484	CP030092	4781964	4782810	35.45	34.6689
DPH57_15050	-18.4813	-18.3158	2.84e-07	-19.0208	0.00154	2.96e-05	108.644	99.7	1026	1026	108.644	CP030092	3556618	3558748	99.2969	109.1	522	522	99.2969	CP030092	3556618	3558748	104.4	103.97	5.12925	4.2	55	55	5.12925	CP030092	3556618	3558748	6.12212	7.2	30	30	6.12212	CP030092	3556618	3558748	5.7	5.62568
DPH57_14200	-16.9725	-16.1304	4.05e-07	-17.9373	0.00219	4.14e-05	102.653	94.2	568	568	102.653	CP030092	3356875	3358123	83.1132	91.3	256	256	83.1132	CP030092	3356875	3358123	92.75	92.8829	3.9792	3.3	25	25	3.9792	CP030092	3356875	3358123	6.96587	8.2	20	20	6.96587	CP030092	3356875	3358123	5.75	5.47254
DPH57_14305	23.6751	23.619	6.01e-07	21.6512	0.00326	6.03e-05	0.864163	0.8	2	2	0.864163	CP030092	3380996	3381518	3.1048	3.4	4	4	3.1048	CP030092	3380996	3381518	2.1	1.98448	32.3459	26.5	85	85	32.3459	CP030092	3380996	3381518	61.62	72.7	74	74	61.62	CP030092	3380996	3381518	49.6	46.9829
DPH57_15055	-20.7826	-21.4603	6.14e-07	-21.0181	0.00333	6.05e-05	79.7585	73.2	122	122	79.7585	CP030092	3558762	3559107	56.3724	62	48	48	56.3724	CP030092	3558762	3559107	67.6	68.0654	4.03041	3.3	7	7	4.03041	CP030092	3558762	3559107	2.51983	3	2	2	2.51983	CP030092	3558762	3559107	3.15	3.27512
DPH57_23695	31.4563	26.5294	6.51e-07	34.8063	0.00353	6.31e-05	0	0	0	0	0	CP030092	5499702	5500095	6.18591	6.8	6	6	6.18591	CP030092	5499702	5500095	3.4	3.09295	135.966	111.3	269	269	135.966	CP030092	5499702	5500095	58.6197	69.1	53	53	58.6197	CP030092	5499702	5500095	90.2	97.2928
DPH57_18370	-16.455	-16.0058	1.35e-06	-17.3728	0.00732	0.000128	432.327	396.6	3617	3617	432.327	CP030092	4285924	4287811	397.876	437.3	1853	1853	397.876	CP030092	4285924	4287811	416.95	415.102	20.7379	17	197	197	20.7379	CP030092	4285924	4287811	29.7152	35.1	129	129	29.7152	CP030092	4285924	4287811	26.05	25.2265
DPH57_12035	20.5761	20.9655	3.13e-06	18.5852	0.0169581	0.000292	1.92775	1.8	7	7	1.92775	CP030092	2823356	2824175	0.989443	1.1	2	2	0.989443	CP030092	2823356	2824175	1.45	1.4586	27.6498	22.6	112	114	27.6498	CP030092	2823356	2824175	32.3747	38.2	60	61	32.3747	CP030092	2823356	2824175	30.4	30.0122
DPH57_20555	14.7188	13.9833	3.2e-06	14.184	0.0173702	0.000294	1.04711	1	5	5	1.04711	CP030092	4780864	4781941	4.51451	5	12	12	4.51451	CP030092	4780864	4781941	3	2.78081	35.0436	28.7	190	190	35.0436	CP030092	4780864	4781941	46.8169	55.2	116	116	46.8169	CP030092	4780864	4781941	41.95	40.9302
DPH57_04855	47.1037	51.9304	3.43e-06	40.5159	0.0186052	0.000307	12.5895	11.5	71	71	12.5895	CP030092	1102781	1104053	0	0	0	0	0	CP030092	1102781	1104053	5.75	6.29473	283.752	232.4	1816	1817	283.752	CP030092	1102781	1104053	309.259	364.8	905	905	309.259	CP030092	1102781	1104053	298.6	296.505
DPH57_18495	20.1162	17.9646	3.46e-06	22.3436	0.0187313	0.000307	1.83371	1.7	2	2	1.83371	CP030092	4308384	4308630	16.4706	18.1	10	10	16.4706	CP030092	4308384	4308630	9.9	9.15216	218.021	178.5	270	270	218.021	CP030092	4308384	4308630	150.191	177.2	85	85	150.191	CP030092	4308384	4308630	177.85	184.106
DPH57_20570	18.762	19.0968	3.97e-06	16.9124	0.0215213	0.000347	0.991102	0.9	7	7	0.991102	CP030092	4783852	4785445	2.03479	2.2	8	8	2.03479	CP030092	4783852	4785445	1.55	1.51294	21.5725	17.7	172	173	21.5725	CP030092	4783852	4785445	35.1993	41.5	129	129	35.1993	CP030092	4783852	4785445	29.6	28.3859
DPH57_16640	13.913	13.1502	4.11e-06	14.3368	0.0222877	0.000354	9.58639	8.8	108	108	9.58639	CP030092	3898082	3900623	14.9888	16.5	94	94	14.9888	CP030092	3898082	3900623	12.65	12.2876	195.827	160.4	2493	2505	195.827	CP030092	3898082	3900623	146.088	172.3	850	854	146.088	CP030092	3898082	3900623	166.35	170.958
DPH57_08585	31.9695	35.3047	4.95e-06	27.4364	0.0268503	0.00042	4.42248	4.1	6	6	4.42248	CP030092	2033354	2033660	7.94464	8.7	6	6	7.94464	CP030092	2033354	2033660	6.4	6.18356	40.2477	33	62	62	40.2477	CP030092	2033354	2033660	355.123	418.9	250	250	355.123	CP030092	2033354	2033660	225.95	197.685
DPH57_10270	-40.0488	-34.3447	6.62e-06	-49.8486	0.0358782	0.00055	976.834	896.1	7314	7315	976.834	CP030092	2427851	2429540	100.275	110.2	418	418	100.275	CP030092	2427851	2429540	503.15	538.554	6.82132	5.6	58	58	6.82132	CP030092	2427851	2429540	20.0736	23.7	78	78	20.0736	CP030092	2427851	2429540	14.65	13.4475
DPH57_15940	19.8531	17.9412	6.7e-06	20.8949	0.0363176	0.00055	4.17679	3.8	14	14	4.17679	CP030092	3736504	3737260	4.28759	4.7	8	8	4.28759	CP030092	3736504	3737260	4.25	4.23219	126.647	103.7	482	482	126.647	CP030092	3736504	3737260	41.3972	48.8	72	72	41.3972	CP030092	3736504	3737260	76.25	84.0222
DPH57_23265	13.1905	12.8714	6.93e-06	12.8053	0.0375522	0.000561	2.42523	2.2	2	2	2.42523	CP030092	5397334	5397520	4.35674	4.8	2	2	4.35674	CP030092	5397334	5397520	3.5	3.39099	42.7186	35	40	40	42.7186	CP030092	5397334	5397520	46.7388	55.1	20	20	46.7388	CP030092	5397334	5397520	45.05	44.7287
DPH57_15935	28.3096	29.3333	8.09e-06	26.3944	0.0438687	0.000645	2.66132	2.4	4	4	2.66132	CP030092	3736153	3736492	0	0	0	0	0	CP030092	3736153	3736492	1.2	1.33066	50.9788	41.7	87	87	50.9788	CP030092	3736153	3736492	24.3621	28.7	19	19	24.3621	CP030092	3736153	3736492	35.2	37.6705
DPH57_04985	-20.8472	-21.3553	8.23e-06	-19.5388	0.0446223	0.000647	69.2311	63.5	349	349	69.2311	CP030092	1136161	1137298	385.221	423.4	1081	1081	385.221	CP030092	1136161	1137298	243.45	227.226	8.03652	6.6	46	46	8.03652	CP030092	1136161	1137298	13.7627	16.2	36	36	13.7627	CP030092	1136161	1137298	11.4	10.8996
DPH57_08130	-48.4575	-49.5	9.39e-06	-39.8952	0.0508943	0.000727	10.6533	9.8	35	35	10.6533	CP030092	1911883	1912624	72.1773	79.3	132	132	72.1773	CP030092	1911883	1912624	44.55	41.4153	0.536145	0.4	2	2	0.536145	CP030092	1911883	1912624	1.1732	1.4	2	2	1.1732	CP030092	1911883	1912624	0.9	0.854672
DPH57_26725	14.0228	13.2182	1.01e-05	14.4742	0.0546493	0.00077	55.6308	51	276	276	55.6308	CP030092	6235456	6236575	61.555	67.7	170	170	61.555	CP030092	6235456	6236575	59.35	58.5929	1024.1	838.6	5767	5769	1024.1	CP030092	6235456	6236575	619.182	730.4	1594	1594	619.182	CP030092	6235456	6236575	784.5	821.639
DPH57_10810	-15.4252	-14.4086	1.11e-05	-16.0782	0.0604045	0.000839	100.874	92.5	1013	1013	100.874	CP030092	2553410	2555675	281.567	309.5	1574	1574	281.567	CP030092	2553410	2555675	201	191.22	3.68342	3	42	42	3.68342	CP030092	2553410	2555675	21.1098	24.9	110	110	21.1098	CP030092	2553410	2555675	13.95	12.3966
DPH57_06500	-12.4653	-11.9212	1.31e-05	-13.6277	0.07107	0.000974	810.146	743.2	4181	4181	810.146	CP030092	1512603	1513767	480.016	527.6	1379	1379	480.016	CP030092	1512603	1513767	635.4	645.081	43.0049	35.2	252	252	43.0049	CP030092	1512603	1513767	60.4954	71.4	162	162	60.4954	CP030092	1512603	1513767	53.3	51.7501
DPH57_10875	Inf	Inf	1.72e-05	265.487	0.0934877	0.00126	0	0	0	0	0	CP030092	2565701	2566703	0	0	0	0	0	CP030092	2565701	2566703	0	0	3.17192	2.6	0	16	3.17192	CP030092	2565701	2566703	73.7465	87	2	170	73.7465	CP030092	2565701	2566703	44.8	38.4592
DPH57_13350	-13.2504	-13.1352	1.74e-05	-14.0137	0.0943204	0.00126	445.38	408.5	1949	1949	445.38	CP030092	3127133	3128120	255.75	281.1	623	623	255.75	CP030092	3127133	3128120	344.8	350.565	27.3711	22.4	136	136	27.3711	CP030092	3127133	3128120	25.5429	30.1	58	58	25.5429	CP030092	3127133	3128120	26.25	26.457
DPH57_17205	-13.1248	-12.1134	1.92e-05	-14.4309	0.103924	0.00137	87.1762	80	298	298	87.1762	CP030092	4024941	4025712	34.1589	37.5	65	65	34.1589	CP030092	4024941	4025712	58.75	60.6675	3.60698	3	14	14	3.60698	CP030092	4024941	4025712	5.63775	6.7	10	10	5.63775	CP030092	4024941	4025712	4.85	4.62237
DPH57_06465	11.6248	10.4167	2.31e-05	12.7949	0.125209	0.00163	4.07237	3.7	26	26	4.07237	CP030092	1505384	1506824	16.3196	17.9	58	58	16.3196	CP030092	1505384	1506824	10.8	10.196	151.326	123.9	1097	1097	151.326	CP030092	1505384	1506824	85.7267	101.1	284	284	85.7267	CP030092	1505384	1506824	112.5	118.527
DPH57_18365	-12.0117	-12.3902	2.45e-05	-12.067	0.133046	0.00171	374.276	343.3	458	458	374.276	CP030092	4285638	4285914	334.711	367.9	228	228	334.711	CP030092	4285638	4285914	355.6	354.494	33.8267	27.7	47	47	33.8267	CP030092	4285638	4285914	25.1983	29.7	16	16	25.1983	CP030092	4285638	4285914	28.7	29.5125
DPH57_14180	-14.5875	-13.7982	3.68e-05	-16.3797	0.19957	0.00253	487.481	447.2	1621	1621	487.481	CP030092	3353696	3354446	140.461	154.4	260	260	140.461	CP030092	3353696	3354446	300.8	313.971	19.8642	16.3	75	75	19.8642	CP030092	3353696	3354446	23.1824	27.3	40	40	23.1824	CP030092	3353696	3354446	21.8	21.5233
DPH57_25860	39.7551	44.6159	4.29e-05	33.8094	0.232593	0.00291	9.02186	8.3	24	24	9.02186	CP030092	6043851	6044451	17.5577	19.3	26	26	17.5577	CP030092	6043851	6044451	13.8	13.2898	41.7148	34.2	126	126	41.7148	CP030092	6043851	6044451	1014.96	1197.2	1401	1401	1014.96	CP030092	6043851	6044451	615.7	528.335
DPH57_04980	-13.4187	-14.6298	4.34e-05	-12.1753	0.235398	0.00291	140.152	128.6	645	645	140.152	CP030092	1135121	1136159	472.706	519.5	1211	1211	472.706	CP030092	1135121	1136159	324.05	306.429	26.409	21.6	138	138	26.409	CP030092	1135121	1136159	19.2629	22.7	46	46	19.2629	CP030092	1135121	1136159	22.15	22.8359
DPH57_12490	69.7133	77.0971	5e-05	61.7307	0.27124	0.00331	15.9039	14.6	22	22	15.9039	CP030092	2933952	2934264	59.7376	65.7	46	46	59.7376	CP030092	2933952	2934264	40.15	37.8208	80.8574	66.2	127	127	80.8574	CP030092	2933952	2934264	5192.36	6124.7	3727	3727	5192.36	CP030092	2933952	2934264	3095.45	2636.61
DPH57_13180	34.8401	27.2593	6.65e-05	38.2151	0.360438	0.00433	0	0	0	0	0	CP030092	3089887	3090214	2.47815	2.7	2	2	2.47815	CP030092	3089887	3090214	1.35	1.23907	78.3632	64.2	129	129	78.3632	CP030092	3089887	3090214	7.97561	9.4	6	6	7.97561	CP030092	3089887	3090214	36.8	43.1694
DPH57_08135	-15.6071	-15.8776	6.7e-05	-14.1501	0.36351	0.00433	10.71	9.8	101	101	10.71	CP030092	1912635	1914762	61.91	68	325	325	61.91	CP030092	1912635	1914762	38.9	36.31	1.58764	1.3	17	17	1.58764	CP030092	1912635	1914762	3.06538	3.6	15	15	3.06538	CP030092	1912635	1914762	2.45	2.32651
DPH57_02185	12.6323	12.1842	7.43e-05	11.8965	0.402976	0.00474	1.82102	1.7	7	7	1.82102	CP030092	480259	481126	1.86933	2.1	4	4	1.86933	CP030092	480259	481126	1.9	1.84517	24.057	19.7	105	105	24.057	CP030092	480259	481126	22.5608	26.6	44	45	22.5608	CP030092	480259	481126	23.15	23.3089
DPH57_06475	8.44916	7.86268	7.75e-05	8.99589	0.420146	0.00489	5.61061	5.1	20	20	5.61061	CP030092	1507785	1508589	21.166	23.3	42	42	21.166	CP030092	1507785	1508589	14.2	13.3883	120.816	98.9	489	489	120.816	CP030092	1507785	1508589	105.424	124.4	195	195	105.424	CP030092	1507785	1508589	111.65	113.12
DPH57_09775	#NAME?	#NAME?	9.44e-05	-84.4522	0.51177	0.00586	10.614	9.7	0	4	10.614	CP030092	2323949	2324034	9.53357	10.5	0	2	9.53357	CP030092	2323949	2324034	10.1	10.0738	0	0	0	0	0	CP030092	2323949	2324034	0	0	0	0	0	CP030092	2323949	2324034	0	0
DPH57_20535	8.60312	8.11864	9.51e-05	8.76056	0.51555	0.00586	1.20291	1.1	4	4	1.20291	CP030092	4778244	4778994	9.72424	10.7	18	18	9.72424	CP030092	4778244	4778994	5.9	5.46358	41.8472	34.3	158	158	41.8472	CP030092	4778244	4778994	52.1605	61.5	90	90	52.1605	CP030092	4778244	4778994	47.9	47.0038
DPH57_13795	-16.4812	-14.8409	0.000103	-19.5075	0.559937	0.00625	370.373	339.7	1739	1739	370.373	CP030092	3243954	3245013	47.4428	52.1	124	124	47.4428	CP030092	3243954	3245013	195.9	208.908	9.75389	8	52	52	9.75389	CP030092	3243954	3245013	15.5972	18.4	38	38	15.5972	CP030092	3243954	3245013	13.2	12.6756
DPH57_21200	Inf	Inf	0.000104	103.735	0.562145	0.00625	0	0	0	0	0	CP030092	4928559	4928636	0	0	0	0	0	CP030092	4928559	4928636	0	0	5.15952	4.2	0	2	5.15952	CP030092	4928559	4928636	22.5803	26.6	0	4	22.5803	CP030092	4928559	4928636	15.4	13.8699
DPH57_17990	-7.05379	-6.63158	0.000132	-7.51635	0.718103	0.00789	90.5134	83	920	921	90.5134	CP030092	4199232	4201527	130.822	143.8	741	741	130.822	CP030092	4199232	4201527	113.4	110.668	7.70332	6.3	89	89	7.70332	CP030092	4199232	4201527	23.6749	27.9	125	125	23.6749	CP030092	4199232	4201527	17.1	15.6891
DPH57_08985	-10.4384	-10.0234	0.000144	-10.4335	0.778014	0.00846	41.8514	38.4	167	167	41.8514	CP030092	2120713	2121613	198.537	218.2	441	441	198.537	CP030092	2120713	2121613	128.3	120.194	4.19355	3.4	19	19	4.19355	CP030092	2120713	2121613	18.8357	22.2	39	39	18.8357	CP030092	2120713	2121613	12.8	11.5146
DPH57_05000	-9.16951	-9.66932	0.000165	-8.51831	0.892606	0.0096	48.0945	44.1	87	87	48.0945	CP030092	1140412	1140820	180.741	198.6	182	182	180.741	CP030092	1140412	1140820	121.35	114.418	12.1717	10	25	25	12.1717	CP030092	1140412	1140820	12.7844	15.1	12	12	12.7844	CP030092	1140412	1140820	12.55	12.478
DPH57_06470	7.1929	6.82201	0.000168	7.37547	0.911193	0.00969	12.9707	11.9	54	54	12.9707	CP030092	1506837	1507776	17.2599	19	40	40	17.2599	CP030092	1506837	1507776	15.45	15.1153	126.716	103.8	599	599	126.716	CP030092	1506837	1507776	90.73	107	196	196	90.73	CP030092	1506837	1507776	105.4	108.723
DPH57_07790	-8.28409	-8.46465	0.000247	-7.86294	1	0.014116	18.427	16.9	25	25	18.427	CP030092	1816708	1817014	60.9089	66.9	46	46	60.9089	CP030092	1816708	1817014	41.9	39.668	3.89494	3.2	6	6	3.89494	CP030092	1816708	1817014	5.68197	6.7	4	4	5.68197	CP030092	1816708	1817014	4.95	4.78845
DPH57_18600	-6.35667	-6.13687	0.000256	-6.78125	1	0.014335	151.124	138.6	199	199	151.124	CP030092	4334920	4335217	126.874	139.4	93	93	126.874	CP030092	4334920	4335217	139	138.999	17.3895	14.2	26	26	17.3895	CP030092	4334920	4335217	26.3437	31.1	18	18	26.3437	CP030092	4334920	4335217	22.65	21.8666
DPH57_19515	16.6798	18.5446	0.000257	14.5228	1	0.014335	33.8849	31.1	64	64	33.8849	CP030092	4561048	4561474	65.6272	72.1	69	69	65.6272	CP030092	4561048	4561474	51.6	49.7561	122.169	100	262	262	122.169	CP030092	4561048	4561474	1537.67	1813.8	1507	1507	1537.67	CP030092	4561048	4561474	956.9	829.921
DPH57_06875	7.05124	7.02007	0.000261	7.01283	1	0.0144313	5.78324	5.3	13	13	5.78324	CP030092	1601249	1601756	22.3766	24.6	28	28	22.3766	CP030092	1601249	1601756	14.95	14.0799	67.3893	55.2	172	172	67.3893	CP030092	1601249	1601756	131.173	154.7	153	153	131.173	CP030092	1601249	1601756	104.95	99.281
DPH57_24060	-10.314	-9.43452	0.000346	-12.0599	1	0.0187886	554.523	508.7	2551	2552	554.523	CP030092	5582749	5583787	113.98	125.3	292	292	113.98	CP030092	5582749	5583787	317	334.252	25.4522	20.8	132	133	25.4522	CP030092	5582749	5583787	39.3632	46.4	94	94	39.3632	CP030092	5582749	5583787	33.6	32.4077
DPH57_00205	-6.78642	-6.79675	0.000347	-6.62189	1	0.0187886	22.7875	20.9	137	137	22.7875	CP030092	41019	42375	57.0714	62.7	191	191	57.0714	CP030092	41019	42375	41.8	39.9294	4.39473	3.6	30	30	4.39473	CP030092	41019	42375	7.37273	8.7	23	23	7.37273	CP030092	41019	42375	6.15	5.88373
DPH57_25835	11.8889	12.8986	0.000354	10.2393	1	0.0190107	2.26965	2.1	16	16	2.26965	CP030092	6037954	6039544	4.33208	4.8	17	17	4.33208	CP030092	6037954	6039544	3.45	3.30086	9.86962	8.1	79	79	9.86962	CP030092	6037954	6039544	68.6178	80.9	251	251	68.6178	CP030092	6037954	6039544	44.5	39.2437
DPH57_16925	-14.359	-13.7752	0.000372	-14.5392	1	0.0197783	194.479	178.4	313	313	194.479	CP030092	3955216	3955579	1739.02	1911.3	1558	1558	1739.02	CP030092	3955216	3955579	1044.85	966.752	19.7	16.1	36	36	19.7	CP030092	3955216	3955579	114.954	135.6	96	96	114.954	CP030092	3955216	3955579	75.85	67.3271
DPH57_23270	6.87123	6.543	0.000388	7.20894	1	0.0204161	20.3925	18.7	83	83	20.3925	CP030092	5397582	5398500	53.847	59.2	122	122	53.847	CP030092	5397582	5398500	38.95	37.1198	254.902	208.7	1178	1178	254.902	CP030092	5397582	5398500	255.215	301	538	539	255.215	CP030092	5397582	5398500	254.85	255.058
DPH57_10430	20.7862	23.332	0.000423	17.6507	1	0.0220737	8.03473	7.4	28	28	8.03473	CP030092	2469333	2470119	15.4648	17	30	30	15.4648	CP030092	2469333	2470119	12.2	11.7498	18.9544	15.5	75	75	18.9544	CP030092	2469333	2470119	469.511	553.8	849	849	469.511	CP030092	2469333	2470119	284.65	244.232
DPH57_25840	13.1653	14.3043	0.000456	11.8075	1	0.0235523	7.9715	7.3	51	51	7.9715	CP030092	6039574	6041017	24.7093	27.2	88	88	24.7093	CP030092	6039574	6041017	17.25	16.3404	38.9574	31.9	282	283	38.9574	CP030092	6039574	6041017	391.294	461.6	1299	1299	391.294	CP030092	6039574	6041017	246.75	215.126
DPH57_04870	31.7983	36.3392	0.00046	25.697	1	0.0235523	37.3282	34.2	71	71	37.3282	CP030092	1106492	1106921	0	0	0	0	0	CP030092	1106492	1106921	17.1	18.6641	436.178	357.2	942	942	436.178	CP030092	1106492	1106921	750.795	885.6	741	741	750.795	CP030092	1106492	1106921	621.4	593.486
DPH57_12040	23.287	25.0909	0.000467	19.5895	1	0.0236818	1.22247	1.1	2	2	1.22247	CP030092	2824343	2824712	0	0	0	0	0	CP030092	2824343	2824712	0.55	0.611237	16.6881	13.7	31	31	16.6881	CP030092	2824343	2824712	11.7797	13.9	10	10	11.7797	CP030092	2824343	2824712	13.8	14.2339
DPH57_21145	7.67074	7.17728	0.00052	8.35467	1	0.0261125	20.2794	18.6	41	41	20.2794	CP030092	4915153	4915609	95.9629	105.5	108	108	95.9629	CP030092	4915153	4915609	62.05	58.1212	446.508	365.6	1025	1025	446.508	CP030092	4915153	4915609	445.156	525.1	467	467	445.156	CP030092	4915153	4915609	445.35	445.832
DPH57_02610	-6.36431	-5.90106	0.00054	-7.14766	1	0.0268673	119.363	109.5	643	643	119.363	CP030092	573566	574781	52.3562	57.5	157	157	52.3562	CP030092	573566	574781	83.5	85.8597	9.80947	8	60	60	9.80947	CP030092	573566	574781	17.1722	20.3	48	48	17.1722	CP030092	573566	574781	14.15	13.4908
DPH57_02565	-9.51675	-8.83301	0.000561	-10.9695	1	0.0276655	787.816	722.7	2714	2714	787.816	CP030092	564545	565322	160.611	176.5	308	308	160.611	CP030092	564545	565322	449.6	474.213	43.7165	35.8	171	171	43.7165	CP030092	564545	565322	55.9422	66	100	100	55.9422	CP030092	564545	565322	50.9	49.8293
DPH57_24070	-9.65824	-8.89499	0.000576	-11.2336	1	0.0281419	662.176	607.4	4395	4395	662.176	CP030092	5584362	5585859	125.586	138	464	464	125.586	CP030092	5584362	5585859	372.7	393.881	34.2348	28	257	258	34.2348	CP030092	5584362	5585859	47.3289	55.8	163	163	47.3289	CP030092	5584362	5585859	41.9	40.7818
DPH57_18375	-6.98003	-7.04927	0.000582	-7.17997	1	0.0281507	439.398	403.1	526	526	439.398	CP030092	4287815	4288085	336.147	369.5	224	224	336.147	CP030092	4287815	4288085	386.3	387.772	59.5925	48.8	81	81	59.5925	CP030092	4287815	4288085	51.5165	60.8	32	32	51.5165	CP030092	4287815	4288085	54.8	55.5545
DPH57_01130	Inf	Inf	0.000587	65.4918	1	0.0281831	0	0	0	0	0	CP030092	250640	250716	0	0	0	0	0	CP030092	250640	250716	0	0	5.22741	4.3	0	2	5.22741	CP030092	250640	250716	11.4387	13.5	0	2	11.4387	CP030092	250640	250716	8.9	8.33306
DPH57_13875	6.0535	6.25628	0.000622	5.65712	1	0.0295725	12.4281	11.4	81	81	12.4281	CP030092	3275944	3277414	7.71765	8.5	28	28	7.71765	CP030092	3275944	3277414	9.95	10.0729	53.6468	43.9	397	397	53.6468	CP030092	3275944	3277414	68.3054	80.6	231	231	68.3054	CP030092	3275944	3277414	62.25	60.9761
DPH57_13790	-8.45812	-7.83226	0.000637	-9.70568	1	0.0300518	212.084	194.5	1212	1213	212.084	CP030092	3242609	3243899	43.9727	48.3	140	140	43.9727	CP030092	3242609	3243899	121.4	128.028	13.0888	10.7	85	85	13.0888	CP030092	3242609	3243899	17.1846	20.3	51	51	17.1846	CP030092	3242609	3243899	15.5	15.1367
DPH57_13665	-7.49628	-7.66176	0.000673	-7.11179	1	0.0314389	11.9642	11	81	81	11.9642	CP030092	3198763	3200290	37.4132	41.1	141	141	37.4132	CP030092	3198763	3200290	26.05	24.6887	2.60172	2.1	20	20	2.60172	CP030092	3198763	3200290	3.98519	4.7	14	14	3.98519	CP030092	3198763	3200290	3.4	3.29346
DPH57_14205	-5.09207	-4.83333	0.000695	-5.46702	1	0.0322273	75.0904	68.9	818	818	75.0904	CP030092	3358166	3360623	63.984	70.3	388	388	63.984	CP030092	3358166	3360623	69.6	69.5372	9.62082	7.9	118	119	9.62082	CP030092	3358166	3360623	17.6911	20.9	100	100	17.6911	CP030092	3358166	3360623	14.4	13.656
DPH57_18545	-39.566	-52.3043	0.000711	-29.7293	1	0.0326689	2.25096	2.1	0	10	2.25096	CP030092	4323929	4324931	107.562	118.2	2	266	107.562	CP030092	4323929	4324931	60.15	54.9064	2.77543	2.3	0	14	2.77543	CP030092	4323929	4324931	0	0	0	0	0	CP030092	4323929	4324931	1.15	1.38772
DPH57_06085	-6.09458	-5.70112	0.000746	-6.84214	1	0.0339786	2392.16	2194.3	6649	6650	2392.16	CP030092	1412884	1413511	1396.47	1534.8	2161	2161	1396.47	CP030092	1412884	1413511	1864.55	1894.32	219.551	179.8	693	693	219.551	CP030092	1412884	1413511	402.088	474.3	580	580	402.088	CP030092	1412884	1413511	327.05	310.819
DPH57_24065	-9.80031	-9.27993	0.00079	-11.1125	1	0.0356797	502.681	461.1	1257	1257	502.681	CP030092	5583797	5584361	81.1791	89.2	112	113	81.1791	CP030092	5583797	5584361	275.15	291.93	30.2893	24.8	86	86	30.2893	CP030092	5583797	5584361	29.2863	34.5	38	38	29.2863	CP030092	5583797	5584361	29.65	29.7878
DPH57_10815	-6.18406	-5.9092	0.000809	-6.47864	1	0.0362341	153.352	140.7	308	308	153.352	CP030092	2555685	2556138	321.995	353.9	360	360	321.995	CP030092	2555685	2556138	247.3	237.673	19.2941	15.8	44	44	19.2941	CP030092	2555685	2556138	57.5723	67.9	60	60	57.5723	CP030092	2555685	2556138	41.85	38.4332
DPH57_21555	-16.1068	-20.381	0.000824	-13.0715	1	0.0364863	12.6623	11.6	0	64	12.6623	CP030092	5024291	5025431	106.27	116.8	2	299	106.27	CP030092	5024291	5025431	64.2	59.4662	6.62139	5.4	0	38	6.62139	CP030092	5024291	5025431	0.76258	0.9	0	2	0.76258	CP030092	5024291	5025431	3.15	3.69198
DPH57_07985	7.44627	7.71831	0.000828	6.90376	1	0.0364863	5.63866	5.2	12	12	5.63866	CP030092	1867701	1868181	1.68824	1.9	2	2	1.68824	CP030092	1867701	1868181	3.55	3.66345	26.4856	21.7	64	64	26.4856	CP030092	1867701	1868181	28.0725	33.1	31	31	28.0725	CP030092	1867701	1868181	27.4	27.279
DPH57_25845	9.10462	9.80315	0.000854	8.21858	1	0.0373397	6.22369	5.7	23	25	6.22369	CP030092	6041109	6042015	17.8886	19.7	40	40	17.8886	CP030092	6041109	6042015	12.7	12.0561	27.6257	22.6	126	126	27.6257	CP030092	6041109	6042015	191.908	226.4	400	400	191.908	CP030092	6041109	6042015	124.5	109.767
DPH57_12495	26.2141	28.6657	0.000873	23.4979	1	0.037868	4.79886	4.4	30	30	4.79886	CP030092	2934297	2935707	26.7244	29.4	93	93	26.7244	CP030092	2934297	2935707	16.9	15.7616	16.2013	13.3	115	115	16.2013	CP030092	2934297	2935707	810.152	955.6	2628	2628	810.152	CP030092	2934297	2935707	484.45	413.177
DPH57_18350	-7.88508	-8.575	0.000898	-7.51414	1	0.0386525	13.5367	12.4	139	139	13.5367	CP030092	4281795	4284111	19.9439	21.9	114	114	19.9439	CP030092	4281795	4284111	17.15	16.7403	2.74462	2.2	32	32	2.74462	CP030092	4281795	4284111	1.50145	1.8	8	8	1.50145	CP030092	4281795	4284111	2	2.12304
DPH57_12840	14.6363	16.8418	0.000906	11.9918	1	0.0386936	9.5353	8.7	26	26	9.5353	CP030092	3021390	3022005	9.88236	10.9	15	15	9.88236	CP030092	3021390	3022005	9.8	9.70883	14.2118	11.6	44	44	14.2118	CP030092	3021390	3022005	269.99	318.5	382	382	269.99	CP030092	3021390	3022005	165.05	142.101
DPH57_21985	Inf	Inf	0.000923	73.889	1	0.0391058	0	0	0	0	0	CP030092	5119706	5120051	0	0	0	0	0	CP030092	5119706	5120051	0	0	12.0912	9.9	21	21	12.0912	CP030092	5119706	5120051	5.03966	5.9	4	4	5.03966	CP030092	5119706	5120051	7.9	8.56545
DPH57_26460	-6.17224	-6.02469	0.000983	-6.444	1	0.0413315	29.6696	27.2	103	103	29.6696	CP030092	6177617	6178400	19.6638	21.6	38	38	19.6638	CP030092	6177617	6178400	24.4	24.6667	3.5517	2.9	14	14	3.5517	CP030092	6177617	6178400	4.44108	5.2	8	8	4.44108	CP030092	6177617	6178400	4.05	3.99639
DPH57_14310	5.23252	5.22881	0.00103	5.03276	1	0.0431178	4.4671	4.1	53	53	4.4671	CP030092	3381606	3384282	6.96492	7.7	46	46	6.96492	CP030092	3381606	3384282	5.9	5.71601	24.5704	20.1	329	331	24.5704	CP030092	3381606	3384282	35.2479	41.6	217	217	35.2479	CP030092	3381606	3384282	30.85	29.9092
DPH57_25315	30.0613	33.9143	0.00109	24.6015	1	0.044953	2.16872	2	6	6	2.16872	CP030092	5899504	5900128	4.54525	5	7	7	4.54525	CP030092	5899504	5900128	3.5	3.35698	1.91002	1.6	6	6	1.91002	CP030092	5899504	5900128	199.921	235.8	287	287	199.921	CP030092	5899504	5900128	118.7	100.915
DPH57_08125	-11.1393	-11.381	0.0011	-10.1373	1	0.0451695	7.21135	6.6	47	47	7.21135	CP030092	1910417	1911887	37.4858	41.2	136	136	37.4858	CP030092	1910417	1911887	23.9	22.3486	1.3513	1.1	10	10	1.3513	CP030092	1910417	1911887	2.66125	3.1	9	9	2.66125	CP030092	1910417	1911887	2.1	2.00628
DPH57_20085	7.23031	6.24678	0.00113	8.42668	1	0.0459704	44.9543	41.2	57	58	44.9543	CP030092	4679661	4679952	153.16	168.3	110	110	153.16	CP030092	4679661	4679952	104.75	99.057	1056.01	864.7	1547	1547	1056.01	CP030092	4679661	4679952	376.416	444	252	252	376.416	CP030092	4679661	4679952	654.35	716.212
DPH57_16645	7.51144	7.10437	0.00115	7.55122	1	0.0462617	27.5727	25.3	311	311	27.5727	CP030092	3900882	3903426	14.4934	15.9	91	91	14.4934	CP030092	3900882	3903426	20.6	21.033	221.832	181.7	2824	2841	221.832	CP030092	3900882	3903426	94.1444	111	551	551	94.1444	CP030092	3900882	3903426	146.35	157.988
DPH57_22690	5.15909	5.25478	0.00115	4.91536	1	0.0462617	6.42051	5.9	62	62	6.42051	CP030092	5288422	5290600	8.92952	9.8	48	48	8.92952	CP030092	5288422	5290600	7.85	7.67502	30.0972	24.6	330	330	30.0972	CP030092	5288422	5290600	49.095	57.9	242	246	49.095	CP030092	5288422	5290600	41.25	39.5961
DPH57_11885	-7.864	-7.34615	0.00116	-8.97371	1	0.0462617	154.406	141.6	382	382	154.406	CP030092	2785272	2785830	27.5927	30.3	38	38	27.5927	CP030092	2785272	2785830	85.95	90.9995	10.6797	8.7	30	30	10.6797	CP030092	2785272	2785830	12.4637	14.7	16	16	12.4637	CP030092	2785272	2785830	11.7	11.5717
DPH57_08545	15.8454	18.0137	0.00119	12.9661	1	0.0468987	3.03766	2.8	8	8	3.03766	CP030092	2027254	2027848	4.0927	4.5	6	6	4.0927	CP030092	2027254	2027848	3.65	3.56518	4.68179	3.8	14	14	4.68179	CP030092	2027254	2027848	108.302	127.7	148	148	108.302	CP030092	2027254	2027848	65.75	56.4918
DPH57_21260	-7.06799	-6.28129	0.00119	-8.47514	1	0.0468987	375.548	344.5	3106	3107	375.548	CP030092	4938976	4940842	92.9345	102.1	428	428	92.9345	CP030092	4938976	4940842	223.3	234.241	19.6938	16.1	185	185	19.6938	CP030092	4938976	4940842	46.5885	55	200	200	46.5885	CP030092	4938976	4940842	35.55	33.1412
DPH57_05190	-10.9774	-10.5154	0.00122	-12.3634	1	0.0475869	1122.9	1030	3719	3719	1122.9	CP030092	1193016	1193763	117.16	128.8	216	216	117.16	CP030092	1193016	1193763	579.4	620.03	64.0865	52.5	241	241	64.0865	CP030092	1193016	1193763	48.8786	57.7	84	84	48.8786	CP030092	1193016	1193763	55.1	56.4826
DPH57_16930	-17.1104	-15.8652	0.00131	-18.0429	1	0.050854	144.415	132.5	1334	1335	144.415	CP030092	3955666	3957751	1486.04	1633.3	7647	7647	1486.04	CP030092	3955666	3957751	882.9	815.226	3.14397	2.6	33	33	3.14397	CP030092	3955666	3957751	92.146	108.7	442	442	92.146	CP030092	3955666	3957751	55.65	47.645
DPH57_06435	-6.33326	-6.70411	0.00135	-6.20494	1	0.0520309	216.126	198.3	1170	1170	216.126	CP030092	1498331	1499552	205.077	225.4	618	618	205.077	CP030092	1498331	1499552	211.85	210.601	42.2988	34.6	260	260	42.2988	CP030092	1498331	1499552	24.2077	28.6	68	68	24.2077	CP030092	1498331	1499552	31.6	33.2532
DPH57_19455	-7.25183	-7.63309	0.00137	-6.66696	1	0.0524774	14.8605	13.6	152	152	14.8605	CP030092	4548152	4550459	84.1264	92.5	479	479	84.1264	CP030092	4548152	4550459	53.05	49.4935	6.11338	5	71	71	6.11338	CP030092	4548152	4550459	7.53655	8.9	40	40	7.53655	CP030092	4548152	4550459	6.95	6.82496
DPH57_07795	-5.99726	-5.93988	0.0014	-5.91834	1	0.0528831	56.974	52.3	193	194	56.974	CP030092	1817058	1817826	222.109	244.1	421	421	222.109	CP030092	1817058	1817826	148.2	139.541	13.7083	11.2	53	53	13.7083	CP030092	1817058	1817826	32.8267	38.7	58	58	32.8267	CP030092	1817058	1817826	24.95	23.2675
DPH57_07775	-7.5654	-6.96396	0.00145	-7.85111	1	0.0546936	26.7816	24.6	83	83	26.7816	CP030092	1809980	1810679	118.249	130	204	204	118.249	CP030092	1809980	1810679	77.3	72.5153	1.13672	0.9	4	4	1.13672	CP030092	1809980	1810679	18.0335	21.3	29	29	18.0335	CP030092	1809980	1810679	11.1	9.58513
DPH57_06850	7.12284	7.0339	0.00151	6.68505	1	0.0564426	0.666804	0.6	4	4	0.666804	CP030092	1595936	1597289	4.79145	5.3	16	16	4.79145	CP030092	1595936	1597289	2.95	2.72913	11.8921	9.7	81	81	11.8921	CP030092	1595936	1597289	26.9862	31.8	84	84	26.9862	CP030092	1595936	1597289	20.75	19.4391
DPH57_17005	-4.62723	-4.45402	0.0016	-4.94842	1	0.0593185	87.7637	80.5	286	286	87.7637	CP030092	3976568	3977303	67.8051	74.5	123	123	67.8051	CP030092	3976568	3977303	77.5	77.7844	13.513	11.1	50	50	13.513	CP030092	3976568	3977303	20.1072	23.7	34	34	20.1072	CP030092	3976568	3977303	17.4	16.8101
DPH57_07765	-7.02952	-6.7277	0.00163	-6.98001	1	0.059961	20.2491	18.6	101	101	20.2491	CP030092	1807289	1808414	113.45	124.7	315	315	113.45	CP030092	1807289	1808414	71.65	66.8493	3.17827	2.6	18	18	3.17827	CP030092	1807289	1808414	15.8413	18.7	41	41	15.8413	CP030092	1807289	1808414	10.65	9.5098
DPH57_15485	Inf	Inf	0.00169	55.2955	1	0.0620632	0	0	0	0	0	CP030092	3643136	3643349	0	0	0	0	0	CP030092	3643136	3643349	0	0	5.59554	4.6	6	6	5.59554	CP030092	3643136	3643349	8.16283	9.6	4	4	8.16283	CP030092	3643136	3643349	7.1	6.87918
DPH57_02630	Inf	Inf	0.00171	89.6125	1	0.0621482	0	0	0	0	0	CP030092	578238	578586	0	0	0	0	0	CP030092	578238	578586	0	0	17.1243	14	0	30	17.1243	CP030092	578238	578586	2.49811	2.9	0	2	2.49811	CP030092	578238	578586	8.45	9.8112
DPH57_25310	17.811	20	0.00187	13.6958	1	0.0674043	1.0515	1	2	2	1.0515	CP030092	5898761	5899190	0	0	0	0	0	CP030092	5898761	5899190	0.5	0.525749	5.55641	4.5	12	12	5.55641	CP030092	5898761	5899190	13.1718	15.5	13	13	13.1718	CP030092	5898761	5899190	10	9.36412
DPH57_03660	-5.82688	-5.25215	0.00197	-6.88454	1	0.0705556	1128.17	1034.9	5131	5132	1128.17	CP030092	822271	823297	394.514	433.6	999	999	394.514	CP030092	822271	823297	734.25	761.343	79.5728	65.2	411	411	79.5728	CP030092	822271	823297	181.748	214.4	429	429	181.748	CP030092	822271	823297	139.8	130.661
DPH57_23260	5.36101	5.31971	0.00199	5.39295	1	0.0705556	51.3148	47.1	214	215	51.3148	CP030092	5396397	5397342	119.624	131.5	279	279	119.624	CP030092	5396397	5397342	89.3	85.4692	362.6	296.9	1725	1725	362.6	CP030092	5396397	5397342	553.802	653.2	1204	1204	553.802	CP030092	5396397	5397342	475.05	458.201
DPH57_25830	6.83653	7.23673	0.00199	6.31817	1	0.0705556	4.79478	4.4	25	25	4.79478	CP030092	6036760	6037936	18.2605	20.1	53	53	18.2605	CP030092	6036760	6037936	12.25	11.5277	23.8167	19.5	141	141	23.8167	CP030092	6036760	6037936	133.802	157.8	362	362	133.802	CP030092	6036760	6037936	88.65	78.8092
DPH57_20775	4.85586	4.6422	0.00203	4.82798	1	0.0713238	3.91829	3.6	16	16	3.91829	CP030092	4829091	4830012	6.59897	7.3	15	15	6.59897	CP030092	4829091	4830012	5.45	5.25863	26.5287	21.7	123	123	26.5287	CP030092	4829091	4830012	24.5417	28.9	52	52	24.5417	CP030092	4829091	4830012	25.3	25.5352
DPH57_22225	6.41126	6.08211	0.00205	6.46815	1	0.071551	130.536	119.7	632	632	130.536	CP030092	5167394	5168486	89.4209	98.3	241	241	89.4209	CP030092	5167394	5168486	109	109.978	935.726	766.2	5143	5144	935.726	CP030092	5167394	5168486	474.476	559.7	1192	1192	474.476	CP030092	5167394	5168486	662.95	705.101
DPH57_11110	5.07629	4.77366	0.00206	5.21461	1	0.0716563	11.5665	10.6	10	10	11.5665	CP030092	2610911	2611106	12.467	13.7	6	6	12.467	CP030092	2610911	2611106	12.15	12.0167	77.4193	63.4	76	76	77.4193	CP030092	2610911	2611106	44.5816	52.6	20	20	44.5816	CP030092	2610911	2611106	58	61.0005
DPH57_06860	7.6496	8.21818	0.00219	6.73861	1	0.0755861	2.27825	2.1	8	8	2.27825	CP030092	1597773	1598565	3.06952	3.4	6	6	3.06952	CP030092	1597773	1598565	2.75	2.67388	8.52755	7	34	34	8.52755	CP030092	1597773	1598565	32.3808	38.2	59	59	32.3808	CP030092	1597773	1598565	22.6	20.4542
DPH57_13675	-12.084	-12.95	0.00221	-10.5844	1	0.0758468	5.78324	5.3	26	26	5.78324	CP030092	3201269	3202283	18.7804	20.6	47	47	18.7804	CP030092	3201269	3202283	12.95	12.2818	1.17539	1	6	6	1.17539	CP030092	3201269	3202283	0.857338	1	2	2	0.857338	CP030092	3201269	3202283	1	1.01637
DPH57_15585	-6.62594	-7.50397	0.00224	-5.87914	1	0.0763685	42.0136	38.5	76	76	42.0136	CP030092	3661502	3661910	137.045	150.6	138	138	137.045	CP030092	3661502	3661910	94.55	89.5293	18.5009	15.1	38	38	18.5009	CP030092	3661502	3661910	8.52295	10.1	8	8	8.52295	CP030092	3661502	3661910	12.6	13.5119
DPH57_00730	-23.1664	-23.4713	0.00229	-21.1177	1	0.0772406	2.42035	2.2	16	16	2.42035	CP030092	156168	157659	369.578	406.2	1360	1360	369.578	CP030092	156168	157659	204.2	185.999	4.3965	3.6	33	33	4.3965	CP030092	156168	157659	11.6612	13.8	40	40	11.6612	CP030092	156168	157659	8.7	8.02884
DPH57_07785	-6.20837	-5.93737	0.00229	-6.32067	1	0.0772406	49.352	45.3	898	898	49.352	CP030092	1812608	1816712	226.184	248.6	2290	2291	226.184	CP030092	1812608	1816712	146.95	137.768	7.84112	6.4	162	162	7.84112	CP030092	1812608	1816712	36.5403	43.1	345	345	36.5403	CP030092	1812608	1816712	24.75	22.1907
DPH57_17200	-4.47685	-4.06011	0.00234	-4.96385	1	0.078094	43.6922	40.1	221	222	43.6922	CP030092	4023799	4024945	31.1131	34.2	88	88	31.1131	CP030092	4023799	4024945	37.15	37.4027	3.81337	3.1	21	22	3.81337	CP030092	4023799	4024945	12.896	15.2	34	34	12.896	CP030092	4023799	4024945	9.15	8.35468
DPH57_02450	#NAME?	#NAME?	0.00235	-142.891	1	0.078094	29.6772	27.2	0	10	29.6772	CP030092	533087	533163	0	0	0	0	0	CP030092	533087	533163	13.6	14.8386	0	0	0	0	0	CP030092	533087	533163	0	0	0	0	0	CP030092	533087	533163	0	0
DPH57_08560	-10.9976	-13.9545	0.00247	-9.55165	1	0.0815032	7.51822	6.9	5	5	7.51822	CP030092	2030062	2030212	21.6094	23.8	8	8	21.6094	CP030092	2030062	2030212	15.35	14.5638	2.64856	2.2	2	2	2.64856	CP030092	2030062	2030212	0	0	0	0	0	CP030092	2030062	2030212	1.1	1.32428
DPH57_22290	11.0658	12.0952	0.00249	9.7121	1	0.0817066	2.27825	2.1	2	2	2.27825	CP030092	5181128	5181326	0	0	0	0	0	CP030092	5181128	5181326	1.05	1.13912	12.0389	9.9	12	12	12.0389	CP030092	5181128	5181326	13.1718	15.5	6	6	13.1718	CP030092	5181128	5181326	12.7	12.6054
DPH57_23680	-46.6478	-53.5789	0.00264	-46.594	1	0.0861422	110.972	101.8	2	493	110.972	CP030092	5494642	5495644	0	0	0	0	0	CP030092	5494642	5495644	50.9	55.4862	2.37894	1.9	0	12	2.37894	CP030092	5494642	5495644	0	0	0	0	0	CP030092	5494642	5495644	0.95	1.18947
DPH57_07800	-4.79019	-4.91919	0.00266	-4.7759	1	0.0863186	21.8271	20	18	18	21.8271	CP030092	1817861	1818047	26.1404	28.7	12	12	26.1404	CP030092	1817861	1818047	24.35	23.9838	5.33983	4.4	5	5	5.33983	CP030092	1817861	1818047	4.67388	5.5	2	2	4.67388	CP030092	1817861	1818047	4.95	5.00685
DPH57_24050	-5.2564	-4.66745	0.00272	-6.25694	1	0.0876741	162.472	149	577	577	162.472	CP030092	5581293	5582094	44.5138	48.9	88	88	44.5138	CP030092	5581293	5582094	98.95	103.493	11.1596	9.1	45	45	11.1596	CP030092	5581293	5582094	28.2183	33.3	52	52	28.2183	CP030092	5581293	5582094	21.2	19.689
DPH57_14590	-4.57529	-4.63363	0.00293	-4.51341	1	0.0938636	79.6421	73.1	125	125	79.6421	CP030092	3454811	3455165	171.685	188.7	150	150	171.685	CP030092	3454811	3455165	130.9	125.664	23.0065	18.8	41	41	23.0065	CP030092	3454811	3455165	31.925	37.7	26	26	31.925	CP030092	3454811	3455165	28.25	27.4657
DPH57_24020	-5.72859	-5.31922	0.00305	-6.5621	1	0.0972142	142.011	130.3	289	289	142.011	CP030092	5574418	5574877	30.0131	33	34	34	30.0131	CP030092	5574418	5574877	81.65	86.0119	12.9831	10.6	30	30	12.9831	CP030092	5574418	5574877	17.0459	20.1	18	18	17.0459	CP030092	5574418	5574877	15.35	15.0145
DPH57_23275	5.1623	5.36357	0.00314	4.83396	1	0.099347	62.0157	56.9	325	325	62.0157	CP030092	5398546	5399728	70.6146	77.6	206	206	70.6146	CP030092	5398546	5399728	67.25	66.3152	238.975	195.7	1420	1422	238.975	CP030092	5398546	5399728	445.703	525.7	1212	1212	445.703	CP030092	5398546	5399728	360.7	342.339
DPH57_23245	4.68902	4.56059	0.00315	4.79245	1	0.099347	38.1659	35	166	166	38.1659	CP030092	5393875	5394856	78.4746	86.3	190	190	78.4746	CP030092	5393875	5394856	60.65	58.3202	254.934	208.8	1259	1259	254.934	CP030092	5393875	5394856	291.996	344.4	659	659	291.996	CP030092	5393875	5394856	276.6	273.465
DPH57_07260	14.4799	16.5455	0.00321	11.4979	1	0.1006	1.18865	1.1	4	4	1.18865	CP030092	1698703	1699462	0	0	0	0	0	CP030092	1698703	1699462	0.55	0.594325	5.75773	4.7	22	22	5.75773	CP030092	1698703	1699462	11.4538	13.5	20	20	11.4538	CP030092	1698703	1699462	9.1	8.60575
DPH57_07735	-4.201	-4.04072	0.00329	-4.31848	1	0.102601	29.169	26.8	70	71	29.169	CP030092	1801783	1802332	56.8281	62.5	77	77	56.8281	CP030092	1801783	1802332	44.65	42.9986	5.42737	4.4	15	15	5.42737	CP030092	1801783	1802332	15.0432	17.7	19	19	15.0432	CP030092	1801783	1802332	11.05	10.2353
DPH57_23040	Inf	Inf	0.00353	123.613	1	0.109404	0	0	0	0	0	CP030092	5352471	5352548	0	0	0	0	0	CP030092	5352471	5352548	0	0	25.7976	21.1	10	10	25.7976	CP030092	5352471	5352548	0	0	0	0	0	CP030092	5352471	5352548	10.55	12.8988
DPH57_23710	4.3807	4.30535	0.0036	4.44139	1	0.110919	18.6583	17.1	68	68	18.6583	CP030092	5503274	5504096	47.3199	52	96	96	47.3199	CP030092	5503274	5504096	34.55	32.9891	120.345	98.5	498	498	120.345	CP030092	5503274	5504096	168.686	199	319	319	168.686	CP030092	5503274	5504096	148.75	144.515
DPH57_24045	-5.00888	-4.38462	0.00372	-6.01326	1	0.113973	115.31	105.8	250	250	115.31	CP030092	5580802	5581291	28.1718	31	34	34	28.1718	CP030092	5580802	5581291	68.4	71.7409	7.31196	6	18	18	7.31196	CP030092	5580802	5581291	21.3335	25.2	24	24	21.3335	CP030092	5580802	5581291	15.6	14.3227
DPH57_21140	4.33222	4.31667	0.00377	4.20825	1	0.1149	9.16198	8.4	34	34	9.16198	CP030092	4914252	4915089	8.71348	9.6	18	18	8.71348	CP030092	4914252	4915089	9	8.93773	37.9721	31.1	160	160	37.9721	CP030092	4914252	4915089	39.4683	46.6	76	76	39.4683	CP030092	4914252	4915089	38.85	38.7202
DPH57_07745	-5.9706	-5.73563	0.00384	-5.90007	1	0.116427	14.4245	13.2	99	99	14.4245	CP030092	1803460	1805008	78.7844	86.6	301	301	78.7844	CP030092	1803460	1805008	49.9	46.6044	2.69475	2.2	21	21	2.69475	CP030092	1803460	1805008	12.9166	15.2	46	46	12.9166	CP030092	1803460	1805008	8.7	7.80566
DPH57_14565	-4.41745	-4.16363	0.00408	-4.78286	1	0.122968	282.336	259	2978	2978	282.336	CP030092	3447605	3449984	387.124	425.5	2273	2273	387.124	CP030092	3447605	3449984	342.25	334.73	39.912	32.7	478	478	39.912	CP030092	3447605	3449984	111.637	131.7	611	611	111.637	CP030092	3447605	3449984	82.2	75.7744
DPH57_17010	-4.31088	-3.95243	0.00429	-4.89349	1	0.12864	222.016	203.7	1068	1069	222.016	CP030092	3977251	3978337	154.833	170.2	415	415	154.833	CP030092	3977251	3978337	186.95	188.424	23.7785	19.5	130	130	23.7785	CP030092	3977251	3978337	63.6396	75.1	159	159	63.6396	CP030092	3977251	3978337	47.3	43.709
DPH57_23235	4.62911	4.64541	0.00447	4.49545	1	0.132918	61.192	56.1	503	503	61.192	CP030092	5391050	5392904	65.9997	72.5	302	302	65.9997	CP030092	5391050	5392904	64.3	63.5958	269.463	220.7	2515	2515	269.463	CP030092	5391050	5392904	319.321	376.7	1362	1362	319.321	CP030092	5391050	5392904	298.7	294.392
DPH57_24055	-5.51868	-4.90725	0.00452	-6.57933	1	0.132918	152.824	140.2	435	435	152.824	CP030092	5582106	5582748	26.5069	29.1	42	42	26.5069	CP030092	5582106	5582748	84.65	89.6652	10.8294	8.9	35	35	10.8294	CP030092	5582106	5582748	21.6658	25.6	32	32	21.6658	CP030092	5582106	5582748	17.25	16.2476
DPH57_07770	-5.74232	-5.56812	0.00457	-5.68236	1	0.132918	24.4879	22.5	171	171	24.4879	CP030092	1808400	1809975	154.353	169.6	600	600	154.353	CP030092	1808400	1809975	96.05	89.4205	6.30609	5.2	50	50	6.30609	CP030092	1808400	1809975	24.8383	29.3	90	90	24.8383	CP030092	1808400	1809975	17.25	15.5722
DPH57_03345	Inf	Inf	0.00458	43.6054	1	0.132918	0	0	0	0	0	CP030092	745462	745774	0	0	0	0	0	CP030092	745462	745774	0	0	5.09338	4.2	8	8	5.09338	CP030092	745462	745774	5.5727	6.6	4	4	5.5727	CP030092	745462	745774	5.4	5.33304
DPH57_11880	-5.69563	-5.26117	0.00462	-6.58317	1	0.132918	271.002	248.6	2033	2033	271.002	CP030092	2783588	2785280	52.4431	57.6	219	219	52.4431	CP030092	2783588	2785280	153.1	161.723	24.4193	20	208	208	24.4193	CP030092	2783588	2785280	32.3691	38.2	126	126	32.3691	CP030092	2783588	2785280	29.1	28.3942
DPH57_26740	5.01462	5.32342	0.00462	4.61158	1	0.132918	7.94003	7.3	64	64	7.94003	CP030092	6238645	6240463	17.8296	19.6	80	80	17.8296	CP030092	6238645	6240463	13.45	12.8848	25.4585	20.8	232	233	25.4585	CP030092	6238645	6240463	103.766	122.4	434	434	103.766	CP030092	6238645	6240463	71.6	64.6124
DPH57_25005	-4.05503	-3.64211	0.00463	-4.6633	1	0.132918	72.2256	66.3	171	171	72.2256	CP030092	5798846	5799380	34.1441	37.5	45	45	34.1441	CP030092	5798846	5799380	51.9	53.1848	6.69579	5.5	18	18	6.69579	CP030092	5798846	5799380	19.5358	23	24	24	19.5358	CP030092	5798846	5799380	14.25	13.1158
DPH57_08010	4.52684	4.14299	0.00464	4.94918	1	0.132918	27.6405	25.4	25	25	27.6405	CP030092	1872485	1872689	75.4741	83	38	38	75.4741	CP030092	1872485	1872689	54.2	51.5573	281.409	230.4	289	289	281.409	CP030092	1872485	1872689	185.374	218.7	87	87	185.374	CP030092	1872485	1872689	224.55	233.392
DPH57_07755	-5.46794	-5.66321	0.00466	-5.11698	1	0.132918	15.7358	14.4	54	54	15.7358	CP030092	1805768	1806542	86.3749	94.9	165	165	86.3749	CP030092	1805768	1806542	54.65	51.0554	7.44265	6.1	29	29	7.44265	CP030092	1805768	1806542	11.2318	13.2	20	20	11.2318	CP030092	1805768	1806542	9.65	9.33722
DPH57_25825	4.50401	4.67839	0.00478	4.27331	1	0.135638	19.2945	17.7	58	58	19.2945	CP030092	6035933	6036611	38.2468	42	64	64	38.2468	CP030092	6035933	6036611	29.85	28.7707	73.2455	60	250	250	73.2455	CP030092	6035933	6036611	185.921	219.3	290	290	185.921	CP030092	6035933	6036611	139.65	129.583
DPH57_26105	-4.32879	-4.04563	0.00482	-4.84134	1	0.136228	78.7868	72.3	306	306	78.7868	CP030092	6099417	6100293	30.9896	34.1	67	67	30.9896	CP030092	6099417	6100293	53.2	54.8882	9.97744	8.2	44	44	9.97744	CP030092	6099417	6100293	15.3822	18.1	31	31	15.3822	CP030092	6099417	6100293	13.15	12.6798
DPH57_03640	5.23379	5.37484	0.00487	4.87015	1	0.136528	146.188	134.1	175	175	146.188	CP030092	819459	819729	85.5373	94	56	57	85.5373	CP030092	819459	819729	114.05	115.862	567.232	464.5	771	771	567.232	CP030092	819459	819729	645.566	761.5	401	401	645.566	CP030092	819459	819729	613	606.399
DPH57_07780	-5.42376	-5.18838	0.00489	-5.54633	1	0.136528	55.8802	51.3	468	469	55.8802	CP030092	1810695	1812588	254.065	279.2	1187	1187	254.065	CP030092	1810695	1812588	165.25	154.973	10.0737	8.2	95	96	10.0737	CP030092	1810695	1812588	47.0721	55.5	205	205	47.0721	CP030092	1810695	1812588	31.85	28.5729
DPH57_03650	6.10987	6.5165	0.00491	5.41102	1	0.13657	85.2064	78.2	77	119	85.2064	CP030092	820591	820906	30.8706	33.9	12	24	30.8706	CP030092	820591	820906	56.05	58.0385	293.864	240.6	292	466	293.864	CP030092	820591	820906	415.352	489.9	196	301	415.352	CP030092	820591	820906	365.25	354.608
DPH57_25015	-4.66873	-4.74624	0.00499	-4.5707	1	0.137687	210.341	192.9	498	498	210.341	CP030092	5800516	5801050	513.679	564.6	677	677	513.679	CP030092	5800516	5801050	378.75	362.01	64.7259	53	174	174	64.7259	CP030092	5800516	5801050	90.3529	106.6	111	111	90.3529	CP030092	5800516	5801050	79.8	77.5394
DPH57_12795	6.30749	6.1	0.005	5.90316	1	0.137687	1.2835	1.2	32	33	1.2835	CP030092	3006895	3012694	2.51532	2.8	36	36	2.51532	CP030092	3006895	3012694	2	1.89941	10.6189	8.7	310	310	10.6189	CP030092	3006895	3012694	13.3422	15.7	178	178	13.3422	CP030092	3006895	3012694	12.2	11.9805
DPH57_13800	4.37923	4.15595	0.00508	4.48445	1	0.138762	29.8075	27.3	336	337	29.8075	CP030092	3245602	3248152	31.7786	34.9	200	200	31.7786	CP030092	3245602	3248152	31.1	30.793	165.379	135.4	2123	2123	165.379	CP030092	3245602	3248152	104.321	123.1	612	612	104.321	CP030092	3245602	3248152	129.25	134.85
DPH57_16770	-4.19414	-3.72303	0.00509	-4.90729	1	0.138762	92.1188	84.5	446	446	92.1188	CP030092	3927034	3928126	39.3304	43.2	106	106	39.3304	CP030092	3927034	3928126	63.85	65.7246	7.45816	6.1	41	41	7.45816	CP030092	3927034	3928126	23.883	28.2	60	60	23.883	CP030092	3927034	3928126	17.15	15.6706
DPH57_07740	-5.01023	-4.7546	0.00512	-5.0215	1	0.138853	15.161	13.9	73	73	15.161	CP030092	1802378	1803464	57.8291	63.6	155	155	57.8291	CP030092	1802378	1803464	38.75	36.4951	2.56076	2.1	14	14	2.56076	CP030092	1802378	1803464	12.0075	14.2	30	30	12.0075	CP030092	1802378	1803464	8.15	7.28412
DPH57_09565	8.25794	8.96774	0.00522	7.46858	1	0.140823	3.41737	3.1	3	3	3.41737	CP030092	2275726	2275924	0	0	0	0	0	CP030092	2275726	2275924	1.55	1.70869	15.0486	12.3	15	15	15.0486	CP030092	2275726	2275924	13.1718	15.5	6	6	13.1718	CP030092	2275726	2275924	13.9	14.1102
DPH57_13670	-6.42793	-6.69388	0.00536	-6.05936	1	0.143024	8.22662	7.5	36	36	8.22662	CP030092	3200286	3201273	22.9888	25.3	56	56	22.9888	CP030092	3200286	3201273	16.4	15.6077	2.21384	1.8	11	11	2.21384	CP030092	3200286	3201273	2.64237	3.1	6	6	2.64237	CP030092	3200286	3201273	2.45	2.42811
DPH57_23240	4.24734	4.08844	0.00537	4.35655	1	0.143024	37.4662	34.4	150	150	37.4662	CP030092	5392953	5393856	62.3694	68.5	139	139	62.3694	CP030092	5392953	5393856	51.45	49.9178	220.42	180.5	1002	1002	220.42	CP030092	5392953	5393856	203.616	240.2	423	423	203.616	CP030092	5392953	5393856	210.35	212.018
DPH57_02105	-4.96177	-4.90805	0.00538	-4.83532	1	0.143024	19.254	17.7	21	21	19.254	CP030092	460092	460338	100.471	110.4	61	61	100.471	CP030092	460092	460338	64.05	59.8623	6.45989	5.3	8	8	6.45989	CP030092	460092	460338	17.6695	20.8	10	10	17.6695	CP030092	460092	460338	13.05	12.0647
DPH57_20865	5.40331	5.91176	0.00542	4.77482	1	0.143464	6.67641	6.1	23	23	6.67641	CP030092	4850033	4850810	6.77902	7.5	13	13	6.77902	CP030092	4850033	4850810	6.8	6.72771	15.0835	12.4	59	59	15.0835	CP030092	4850033	4850810	57.6204	68	103	103	57.6204	CP030092	4850033	4850810	40.2	36.3519
DPH57_05535	-9.94242	-9.79592	0.00546	-10.9727	1	0.143637	3551.27	3257.6	9825	9825	3551.27	CP030092	1269104	1269728	180.511	198.4	278	278	180.511	CP030092	1269104	1269728	1728	1865.89	249.257	204.1	783	783	249.257	CP030092	1269104	1269728	126.082	148.7	181	181	126.082	CP030092	1269104	1269728	176.4	187.67
DPH57_04995	-5.9974	-6.15342	0.00553	-5.63834	1	0.14478	51.5273	47.3	281	281	51.5273	CP030092	1139193	1140423	365.647	401.9	1110	1110	365.647	CP030092	1139193	1140423	224.6	208.587	25.0321	20.5	154	155	25.0321	CP030092	1139193	1140423	44.5272	52.5	126	126	44.5272	CP030092	1139193	1140423	36.5	34.7797
DPH57_18700	3.8643	3.67078	0.00561	3.97051	1	0.146143	8.08922	7.4	17	17	8.08922	CP030092	4357496	4357970	15.3865	16.9	18	18	15.3865	CP030092	4357496	4357970	12.15	11.7378	49.4509	40.5	118	118	49.4509	CP030092	4357496	4357970	41.2662	48.7	45	45	41.2662	CP030092	4357496	4357970	44.6	45.3585
DPH57_17840	-3.94927	-3.78244	0.00571	-4.30522	1	0.148146	131.264	120.4	323	323	131.264	CP030092	4170043	4170598	70.8147	77.8	97	97	70.8147	CP030092	4170043	4170598	99.1	101.039	22.1906	18.2	62	62	22.1906	CP030092	4170043	4170598	28.978	34.2	37	37	28.978	CP030092	4170043	4170598	26.2	25.5843
DPH57_05720	-5.99144	-5.96174	0.00588	-5.78536	1	0.151923	34.754	31.9	98	98	34.754	CP030092	1320520	1321156	282.859	310.9	444	444	282.859	CP030092	1320520	1321156	171.4	158.807	14.0548	11.5	45	45	14.0548	CP030092	1320520	1321156	38.9563	46	57	57	38.9563	CP030092	1320520	1321156	28.75	26.5056
DPH57_14570	-3.92384	-3.77786	0.00625	-4.15799	1	0.160604	222.472	204.1	1447	1447	222.472	CP030092	3449993	3451460	280.061	307.8	1014	1014	280.061	CP030092	3449993	3451460	255.95	251.266	43.3302	35.5	320	320	43.3302	CP030092	3449993	3451460	84.7415	100	286	286	84.7415	CP030092	3449993	3451460	67.75	64.0358
DPH57_15180	-6.74864	-6.61599	0.00641	-6.65441	1	0.163801	123.433	113.2	110	110	123.433	CP030092	3581262	3581463	1207.47	1327.1	599	599	1207.47	CP030092	3581262	3581463	720.15	665.45	41.5072	34	42	42	41.5072	CP030092	3581262	3581463	155.703	183.7	72	72	155.703	CP030092	3581262	3581463	108.85	98.605
DPH57_11895	-4.1945	-3.83371	0.00652	-4.8284	1	0.165868	130.077	119.3	545	545	130.077	CP030092	2786600	2787545	44.5909	49	104	104	44.5909	CP030092	2786600	2787545	84.15	87.334	14.504	11.9	69	69	14.504	CP030092	2786600	2787545	27.1382	32	59	59	27.1382	CP030092	2786600	2787545	21.95	20.8211
DPH57_13475	4.15325	3.9916	0.00665	4.17281	1	0.168484	31.2555	28.7	407	407	31.2555	CP030092	3151646	3154583	28.0051	30.8	203	203	28.0051	CP030092	3151646	3154583	29.75	29.6303	146.225	119.7	2160	2162	146.225	CP030092	3151646	3154583	99.8987	117.8	674	675	99.8987	CP030092	3151646	3154583	118.75	123.062
DPH57_26390	-3.9952	-4.11765	0.00668	-3.95756	1	0.16849	25.38	23.3	53	53	25.38	CP030092	6166558	6167029	36.1304	39.7	42	42	36.1304	CP030092	6166558	6167029	31.5	30.7552	8.01315	6.6	19	19	8.01315	CP030092	6166558	6167029	7.38294	8.7	8	8	7.38294	CP030092	6166558	6167029	7.65	7.69804
DPH57_06495	-4.1627	-3.92216	0.00678	-4.56881	1	0.170246	45.2126	41.5	175	175	45.2126	CP030092	1511461	1512334	21.8136	24	47	47	21.8136	CP030092	1511461	1512334	32.75	33.5131	6.14356	5	27	27	6.14356	CP030092	1511461	1512334	9.95809	11.7	20	20	9.95809	CP030092	1511461	1512334	8.35	8.05082
DPH57_08195	-3.97957	-4.20743	0.00708	-3.89982	1	0.176828	63.8209	58.5	646	646	63.8209	CP030092	1930916	1933199	70.4578	77.4	397	397	70.4578	CP030092	1930916	1933199	67.95	67.1393	20.7952	17	239	239	20.7952	CP030092	1930916	1933199	12.9468	15.3	68	68	12.9468	CP030092	1930916	1933199	16.15	16.871
DPH57_11900	-4.05783	-3.84145	0.00712	-4.505	1	0.177136	192.17	176.3	1117	1117	192.17	CP030092	2787544	2788855	90.8635	99.9	294	294	90.8635	CP030092	2787544	2788855	138.1	141.517	28.6371	23.4	189	189	28.6371	CP030092	2787544	2788855	41.113	48.5	124	124	41.113	CP030092	2787544	2788855	35.95	34.8751
DPH57_18500	3.77571	3.63158	0.00738	3.81257	1	0.18269	7.10513	6.5	43	43	7.10513	CP030092	4308775	4310140	13.0606	14.4	44	44	13.0606	CP030092	4308775	4310140	10.45	10.0829	38.5641	31.6	264	265	38.5641	CP030092	4308775	4310140	37.5759	44.3	118	118	37.5759	CP030092	4308775	4310140	37.95	38.07
DPH57_14165	-3.78972	-3.39382	0.00747	-4.36136	1	0.184093	62.8572	57.7	356	357	62.8572	CP030092	3348374	3349655	27.5179	30.2	87	87	27.5179	CP030092	3348374	3349655	43.95	45.1875	6.20271	5.1	40	40	6.20271	CP030092	3348374	3349655	17.6447	20.8	52	52	17.6447	CP030092	3348374	3349655	12.95	11.9237
DPH57_18485	3.80222	3.905	0.00758	3.60283	1	0.185853	9.51673	8.7	10	10	9.51673	CP030092	4307542	4307779	10.2576	11.3	6	6	10.2576	CP030092	4307542	4307779	10	9.88719	29.3353	24	35	35	29.3353	CP030092	4307542	4307779	45.8513	54.1	25	25	45.8513	CP030092	4307542	4307779	39.05	37.5933
DPH57_05340	#NAME?	#NAME?	0.00797	-89.983	1	0.194076	18.7305	17.2	0	72	18.7305	CP030092	1226309	1227176	0	0	0	0	0	CP030092	1226309	1227176	8.6	9.36525	0	0	0	0	0	CP030092	1226309	1227176	0	0	0	0	0	CP030092	1226309	1227176	0	0
DPH57_13680	-5.17564	-5.08696	0.00798	-5.00022	1	0.194076	8.01943	7.4	48	48	8.01943	CP030092	3202290	3203640	25.211	27.7	84	84	25.211	CP030092	3202290	3203640	17.55	16.6152	1.91285	1.6	13	13	1.91285	CP030092	3202290	3203640	4.50769	5.3	14	14	4.50769	CP030092	3202290	3203640	3.45	3.21027
DPH57_02075	7.78853	9.01235	0.00819	6.43934	1	0.196951	4.61645	4.2	14	14	4.61645	CP030092	454579	455263	3.55418	3.9	6	6	3.55418	CP030092	454579	455263	4.05	4.08532	5.80824	4.8	20	20	5.80824	CP030092	454579	455263	57.829	68.2	91	91	57.829	CP030092	454579	455263	36.5	31.8186
DPH57_08315	-3.61387	-3.44755	0.00821	-3.76029	1	0.196951	22.7723	20.9	136	136	22.7723	CP030092	1973241	1974588	25.8688	28.4	86	86	25.8688	CP030092	1973241	1974588	24.65	24.3205	4.42409	3.6	30	30	4.42409	CP030092	1973241	1974588	9.03547	10.7	28	28	9.03547	CP030092	1973241	1974588	7.15	6.72978
DPH57_07760	-5.08692	-4.95161	0.00823	-4.96567	1	0.196951	14.0015	12.8	46	46	14.0015	CP030092	1806552	1807293	100.064	110	183	183	100.064	CP030092	1806552	1807293	61.4	57.0327	4.8253	4	16	18	4.8253	CP030092	1806552	1807293	17.598	20.8	30	30	17.598	CP030092	1806552	1807293	12.4	11.2117
DPH57_08550	8.90057	10.4624	0.00825	7.13361	1	0.196951	5.80265	5.3	23	23	5.80265	CP030092	2027870	2028764	3.62574	4	8	8	3.62574	CP030092	2027870	2028764	4.65	4.7142	4.66608	3.8	21	21	4.66608	CP030092	2027870	2028764	79.252	93.5	163	163	79.252	CP030092	2027870	2028764	48.65	41.959
DPH57_23250	3.91006	3.7402	0.00862	4.01279	1	0.204934	35.5407	32.6	52	52	35.5407	CP030092	5394914	5395244	51.568	56.7	42	42	51.568	CP030092	5394914	5395244	44.65	43.5543	187.807	153.8	312	312	187.807	CP030092	5394914	5395244	152.793	180.2	116	116	152.793	CP030092	5394914	5395244	167	170.3
DPH57_15380	4.80199	5.22481	0.00869	4.28917	1	0.205709	5.78324	5.3	6	6	5.78324	CP030092	3619525	3619759	6.9261	7.6	4	4	6.9261	CP030092	3619525	3619759	6.45	6.35467	12.7334	10.4	15	15	12.7334	CP030092	3619525	3619759	48.2967	57	26	26	48.2967	CP030092	3619525	3619759	33.7	30.5151
DPH57_22190	-3.6076	-3.44411	0.0088	-3.87566	1	0.207409	164.645	151	391	392	164.645	CP030092	5160527	5161064	176.558	194.1	234	234	176.558	CP030092	5160527	5161064	172.55	170.601	31.4424	25.7	85	85	31.4424	CP030092	5160527	5161064	63.1365	74.5	78	78	63.1365	CP030092	5160527	5161064	50.1	47.2894
DPH57_08755	#NAME?	#NAME?	0.009	-76.1912	1	0.210424	0	0	0	0	0	CP030092	2073496	2073573	21.0481	23.1	0	4	21.0481	CP030092	2073496	2073573	11.55	10.5241	0	0	0	0	0	CP030092	2073496	2073573	0	0	0	0	0	CP030092	2073496	2073573	0	0
DPH57_20630	#NAME?	#NAME?	0.009	-76.1917	1	0.210424	0	0	0	0	0	CP030092	4793843	4793920	21.0481	23.1	4	4	21.0481	CP030092	4793843	4793920	11.55	10.5241	0	0	0	0	0	CP030092	4793843	4793920	0	0	0	0	0	CP030092	4793843	4793920	0	0
DPH57_13325	-3.84581	-3.87379	0.00938	-3.90715	1	0.217901	19.4917	17.9	28	28	19.4917	CP030092	3120251	3120575	20.0087	22	16	16	20.0087	CP030092	3120251	3120575	19.95	19.7502	4.90473	4	8	8	4.90473	CP030092	3120251	3120575	5.3663	6.3	4	4	5.3663	CP030092	3120251	3120575	5.15	5.13552
DPH57_20180	-4.18466	-3.91736	0.0094	-4.6104	1	0.217901	36.0874	33.1	60	60	36.0874	CP030092	4700957	4701332	12.9657	14.3	12	12	12.9657	CP030092	4700957	4701332	23.7	24.5265	4.7674	3.9	9	9	4.7674	CP030092	4700957	4701332	6.95473	8.2	6	6	6.95473	CP030092	4700957	4701332	6.05	5.86106
DPH57_05715	-4.57814	-4.52206	0.00946	-4.50632	1	0.218221	47.3828	43.5	421	421	47.3828	CP030092	1318524	1320528	240.195	264	1188	1188	240.195	CP030092	1318524	1320528	153.75	143.789	17.0491	14	172	172	17.0491	CP030092	1318524	1320528	45.7662	54	210	211	45.7662	CP030092	1318524	1320528	34	31.4076
DPH57_26385	-3.80521	-3.62925	0.00965	-4.18631	1	0.221745	78.4748	72	143	143	78.4748	CP030092	6166151	6166562	31.5466	34.7	32	32	31.5466	CP030092	6166151	6166562	53.35	55.0107	13.0495	10.7	27	27	13.0495	CP030092	6166151	6166562	15.8639	18.7	15	15	15.8639	CP030092	6166151	6166562	14.7	14.4567
DPH57_24575	4.38001	4.68243	0.0100615	3.9956	1	0.228346	5.03131	4.6	35	35	5.03131	CP030092	5690360	5691929	9.2966	10.2	36	36	9.2966	CP030092	5690360	5691929	7.4	7.16396	13.1668	10.8	104	104	13.1668	CP030092	5690360	5691929	49.5896	58.5	179	179	49.5896	CP030092	5690360	5691929	34.65	31.3782
DPH57_07515	3.40789	3.32319	0.0100717	3.43045	1	0.228346	7.87935	7.2	48	48	7.87935	CP030092	1756656	1758030	17.3984	19.1	59	59	17.3984	CP030092	1756656	1758030	13.15	12.6389	39.3235	32.2	272	272	39.3235	CP030092	1756656	1758030	46.8204	55.2	147	148	46.8204	CP030092	1756656	1758030	43.7	43.072
DPH57_22310	-4.02082	-3.76423	0.0100826	-4.22013	1	0.228346	33.2171	30.5	524	524	33.2171	CP030092	5184251	5187809	98.6181	108.4	866	866	98.6181	CP030092	5184251	5187809	69.45	65.9176	4.68969	3.8	84	84	4.68969	CP030092	5184251	5187809	28.0984	33.1	230	230	28.0984	CP030092	5184251	5187809	18.45	16.3941
DPH57_26095	-4.4314	-4.3973	0.0101075	-4.71927	1	0.228346	521.334	478.2	1477	1477	521.334	CP030092	6097718	6098357	217.489	239	343	343	217.489	CP030092	6097718	6098357	358.6	369.411	93.259	76.4	300	300	93.259	CP030092	6097718	6098357	73.4654	86.7	108	108	73.4654	CP030092	6097718	6098357	81.55	83.3622
DPH57_13660	-4.85193	-4.64706	0.0105181	-4.78995	1	0.236636	9.67691	8.9	39	39	9.67691	CP030092	3197853	3198762	56.6089	62.2	127	127	56.6089	CP030092	3197853	3198762	35.55	33.1429	2.18528	1.8	10	10	2.18528	CP030092	3197853	3198762	11.4764	13.5	24	24	11.4764	CP030092	3197853	3198762	7.65	6.83086
DPH57_09580	Inf	Inf	0.0106573	79.0355	1	0.238775	0	0	0	0	0	CP030092	2277649	2277925	0	0	0	0	0	CP030092	2277649	2277925	0	0	16.5535	13.6	23	23	16.5535	CP030092	2277649	2277925	0	0	0	0	0	CP030092	2277649	2277925	6.8	8.27674
DPH57_09585	5.81357	4.79221	0.0107683	6.52656	1	0.239435	1.93451	1.8	22	22	1.93451	CP030092	2277974	2280539	5.37077	5.9	34	34	5.37077	CP030092	2277974	2280539	3.85	3.65264	36.7081	30.1	474	474	36.7081	CP030092	2277974	2280539	5.76171	6.8	34	34	5.76171	CP030092	2277974	2280539	18.45	21.2349
DPH57_05710	-5.15915	-5.09723	0.010775	-5.07674	1	0.239435	145.31	133.3	690	690	145.31	CP030092	1317473	1318544	951.844	1046.2	2516	2516	951.844	CP030092	1317473	1318544	589.75	548.577	53.9727	44.2	291	291	53.9727	CP030092	1317473	1318544	158.689	187.2	391	391	158.689	CP030092	1317473	1318544	115.7	106.331
DPH57_16980	8.42173	9.74026	0.0108994	6.85672	1	0.241209	4.03964	3.7	18	18	4.03964	CP030092	3968573	3969578	3.62845	4	9	9	3.62845	CP030092	3968573	3969578	3.85	3.83404	3.16245	2.6	16	16	3.16245	CP030092	3968573	3969578	61.4161	72.4	142	142	61.4161	CP030092	3968573	3969578	37.5	32.2893
DPH57_10435	5.52061	6.17391	0.0110771	4.75342	1	0.243503	4.49381	4.1	21	21	4.49381	CP030092	2470124	2471178	4.61302	5.1	12	12	4.61302	CP030092	2470124	2471178	4.6	4.55341	6.97319	5.7	37	37	6.97319	CP030092	2470124	2471178	43.3021	51.1	105	105	43.3021	CP030092	2470124	2471178	28.4	25.1376
DPH57_00185	-3.68254	-3.86179	0.0110928	-3.66532	1	0.243503	22.4526	20.6	66	66	22.4526	CP030092	37995	38658	24.4451	26.9	40	40	24.4451	CP030092	37995	38658	23.75	23.4488	7.49026	6.1	25	25	7.49026	CP030092	37995	38658	5.24489	6.2	8	8	5.24489	CP030092	37995	38658	6.15	6.36758
DPH57_23220	4.07946	3.87144	0.0116141	4.14306	1	0.253918	62.443	57.3	299	299	62.443	CP030092	5387863	5388943	53.2733	58.6	142	142	53.2733	CP030092	5387863	5388943	57.95	57.8581	299.802	245.5	1630	1630	299.802	CP030092	5387863	5388943	172.258	203.2	428	428	172.258	CP030092	5387863	5388943	224.35	236.03
DPH57_05475	8.30471	9.01639	0.0119208	7.17802	1	0.259577	0.892664	0.8	8	9	0.892664	CP030092	1255182	1257456	4.81081	5.3	27	27	4.81081	CP030092	1255182	1257456	3.05	2.85174	2.4459	2	28	28	2.4459	CP030092	1255182	1257456	44.9198	53	235	235	44.9198	CP030092	1255182	1257456	27.5	23.6828
DPH57_22540	-3.56697	-3.2831	0.0119781	-4.00385	1	0.259781	268.825	246.6	969	969	268.825	CP030092	5250182	5250995	281.082	308.9	564	564	281.082	CP030092	5250182	5250995	277.75	274.953	34.9394	28.6	143	143	34.9394	CP030092	5250182	5250995	119.227	140.6	223	223	119.227	CP030092	5250182	5250995	84.6	77.0832
DPH57_24460	-3.21837	-3.09434	0.0121069	-3.45269	1	0.261529	91.8893	84.3	264	264	91.8893	CP030092	5667397	5668045	72.5317	79.7	116	116	72.5317	CP030092	5667397	5668045	82	82.2105	20.232	16.6	66	66	20.232	CP030092	5667397	5668045	30.8562	36.4	46	46	30.8562	CP030092	5667397	5668045	26.5	25.5441
DPH57_26110	-3.60926	-3.3114	0.0127979	-4.14755	1	0.275358	207.536	190.4	991	991	207.536	CP030092	6100309	6101386	83.1421	91.4	221	221	83.1421	CP030092	6100309	6101386	140.9	145.339	27.666	22.7	150	150	27.666	CP030092	6100309	6101386	52.8708	62.4	131	131	52.8708	CP030092	6100309	6101386	42.55	40.2684
DPH57_13835	#NAME?	#NAME?	0.0129069	-68.5405	1	0.276606	14.308	13.1	0	55	14.308	CP030092	3264058	3264925	0	0	0	0	0	CP030092	3264058	3264925	6.55	7.15401	0	0	0	0	0	CP030092	3264058	3264925	0	0	0	0	0	CP030092	3264058	3264925	0	0
DPH57_01250	5.05144	5.32143	0.0132575	4.77881	1	0.283001	4.62944	4.2	25	25	4.62944	CP030092	277190	278408	29.2739	32.2	88	88	29.2739	CP030092	277190	278408	18.2	16.9517	23.1586	19	141	142	23.1586	CP030092	277190	278408	148.102	174.7	415	415	148.102	CP030092	277190	278408	96.85	85.6303
DPH57_07230	8.91839	8.66667	0.013592	7.80872	1	0.286295	0.613732	0.6	2	2	0.613732	CP030092	1692099	1692834	1.10252	1.2	2	2	1.10252	CP030092	1692099	1692834	0.9	0.858127	7.02678	5.8	26	26	7.02678	CP030092	1692099	1692834	8.27944	9.8	14	14	8.27944	CP030092	1692099	1692834	7.8	7.65311
DPH57_25760	4.17116	4.28571	0.0135945	4.08504	1	0.286295	8.95672	8.2	66	66	8.95672	CP030092	6019629	6021291	46.0761	50.6	189	189	46.0761	CP030092	6019629	6021291	29.4	27.5164	52.2301	42.8	437	437	52.2301	CP030092	6019629	6021291	177.32	209.2	678	678	177.32	CP030092	6019629	6021291	126	114.775
DPH57_24395	-4.22451	-4.09488	0.0135967	-4.63183	1	0.286295	650.292	596.5	2863	2863	650.292	CP030092	5652254	5653247	207.281	227.8	508	508	207.281	CP030092	5652254	5653247	412.15	428.786	105.822	86.7	529	529	105.822	CP030092	5652254	5653247	97.1771	114.6	222	222	97.1771	CP030092	5652254	5653247	100.65	101.5
DPH57_23255	3.28289	3.14238	0.013623	3.3666	1	0.286295	22.739	20.9	111	111	22.739	CP030092	5395258	5396359	35.3288	38.8	96	96	35.3288	CP030092	5395258	5396359	29.85	29.0339	103.38	84.7	573	573	103.38	CP030092	5395258	5396359	87.2499	102.9	221	221	87.2499	CP030092	5395258	5396359	93.8	95.3151
DPH57_05595	6.25517	6.88599	0.0138921	5.52727	1	0.290822	7.23271	6.6	38	38	7.23271	CP030092	1282715	1283900	21.883	24.1	64	64	21.883	CP030092	1282715	1283900	15.35	14.5578	9.72255	8	58	58	9.72255	CP030092	1282715	1283900	172.401	203.4	470	470	172.401	CP030092	1282715	1283900	105.7	91.0618
DPH57_26355	-5.09428	-5.68889	0.0139562	-4.79504	1	0.291039	7.75183	7.1	73	73	7.75183	CP030092	6159046	6161170	16.787	18.5	88	88	16.787	CP030092	6159046	6161170	12.8	12.2694	3.17976	2.6	34	34	3.17976	CP030092	6159046	6161170	1.63718	1.9	8	8	1.63718	CP030092	6159046	6161170	2.25	2.40847
DPH57_21340	4.00148	3.85997	0.014125	4.24291	1	0.293431	6.19697	5.7	53	53	6.19697	CP030092	4966716	4968645	54.6117	60	260	260	54.6117	CP030092	4966716	4968645	32.85	30.4043	92.5759	75.8	899	899	92.5759	CP030092	4966716	4968645	150.749	177.8	669	669	150.749	CP030092	4966716	4968645	126.8	121.662
DPH57_15110	-3.32029	-3.0471	0.0142669	-3.69392	1	0.295248	118.974	109.1	307	307	118.974	CP030092	3568741	3569323	153.856	169.1	221	221	153.856	CP030092	3568741	3569323	139.1	136.415	15.7002	12.9	46	46	15.7002	CP030092	3568741	3569323	66.4702	78.4	89	89	66.4702	CP030092	3568741	3569323	45.65	41.0852
DPH57_07730	-3.24537	-2.90017	0.0144735	-3.75052	1	0.298386	93.8392	86.1	508	508	93.8392	CP030092	1800477	1801698	74.9959	82.4	226	226	74.9959	CP030092	1800477	1801698	84.25	84.4175	8.94782	7.3	55	55	8.94782	CP030092	1800477	1801698	43.0755	50.8	121	121	43.0755	CP030092	1800477	1801698	29.05	26.0116
DPH57_14750	6.24138	6.66667	0.0147549	5.53841	1	0.301959	1.35463	1.2	2	2	1.35463	CP030092	3491961	3492294	2.43349	2.7	2	2	2.43349	CP030092	3491961	3492294	1.95	1.89406	5.36869	4.4	9	9	5.36869	CP030092	3491961	3492294	18.2744	21.6	14	14	18.2744	CP030092	3491961	3492294	13	11.8216
DPH57_01675	Inf	Inf	0.0147583	37.9045	1	0.301959	0	0	0	0	0	CP030092	363607	363826	0	0	0	0	0	CP030092	363607	363826	0	0	1.81408	1.5	2	2	1.81408	CP030092	363607	363826	7.93919	9.4	4	4	7.93919	CP030092	363607	363826	5.45	4.87663
DPH57_14340	3.2063	3.14901	0.0148865	3.21877	1	0.303439	21.3067	19.5	70	70	21.3067	CP030092	3392416	3393157	37.1822	40.9	68	68	37.1822	CP030092	3392416	3393157	30.2	29.2445	86.0513	70.5	321	321	86.0513	CP030092	3392416	3393157	101.482	119.7	173	173	101.482	CP030092	3392416	3393157	95.1	93.7665
DPH57_11890	-3.5017	-3.11333	0.0151174	-4.15982	1	0.306991	235.613	216.1	749	749	235.613	CP030092	2785839	2786556	115.846	127.3	205	205	115.846	CP030092	2785839	2786556	171.7	175.729	22.1636	18.1	80	80	22.1636	CP030092	2785839	2786556	78.2043	92.2	129	129	78.2043	CP030092	2785839	2786556	55.15	50.184
DPH57_26560	-3.17389	-3.12308	0.0153596	-3.33301	1	0.309467	89.0315	81.7	135	135	89.0315	CP030092	6197828	6198170	73.4531	80.7	62	62	73.4531	CP030092	6197828	6198170	81.2	81.2423	23.2329	19	40	40	23.2329	CP030092	6197828	6198170	27.9613	33	22	22	27.9613	CP030092	6197828	6198170	26	25.5971
DPH57_23230	3.73384	3.73403	0.0154015	3.62381	1	0.309467	126.493	116	461	461	126.493	CP030092	5390059	5390881	122.243	134.4	248	248	122.243	CP030092	5390059	5390881	125.2	124.368	444.89	364.3	1841	1841	444.89	CP030092	5390059	5390881	483.849	570.7	915	915	483.849	CP030092	5390059	5390881	467.5	464.369
DPH57_06290	-11.0026	-13.2727	0.0154317	-9.5691	1	0.309467	7.10677	6.5	38	38	7.10677	CP030092	1466589	1467795	7.39129	8.1	22	22	7.39129	CP030092	1466589	1467795	7.3	7.24903	1.31769	1.1	8	8	1.31769	CP030092	1466589	1467795	0	0	0	0	0	CP030092	1466589	1467795	0.55	0.658845
DPH57_01270	4.31734	4.3737	0.0154677	4.27187	1	0.309467	2.26452	2.1	10	10	2.26452	CP030092	280714	281710	24.4082	26.8	60	60	24.4082	CP030092	280714	281710	14.45	13.3364	26.1266	21.4	131	131	26.1266	CP030092	280714	281710	89.0289	105	204	204	89.0289	CP030092	280714	281710	63.2	57.5777
DPH57_23225	3.74812	3.70871	0.0156183	3.66787	1	0.311332	81.2416	74.5	362	362	81.2416	CP030092	5389023	5390028	72.1658	79.3	179	179	72.1658	CP030092	5389023	5390028	76.9	76.7037	299.05	244.9	1513	1513	299.05	CP030092	5389023	5390028	275.94	325.5	638	638	275.94	CP030092	5389023	5390028	285.2	287.495
DPH57_07750	-4.92679	-4.65192	0.0157577	-5.01419	1	0.312385	17.6208	16.2	60	60	17.6208	CP030092	1805004	1805772	128.728	141.5	244	244	128.728	CP030092	1805004	1805772	78.85	73.1744	3.10378	2.5	12	12	3.10378	CP030092	1805004	1805772	26.6009	31.4	47	47	26.6009	CP030092	1805004	1805772	16.95	14.8524
DPH57_18385	-2.89801	-2.79947	0.0158167	-3.0526	1	0.312385	50.6734	46.5	153	153	50.6734	CP030092	4288603	4289284	52.9526	58.2	89	89	52.9526	CP030092	4288603	4289284	52.35	51.813	13.4178	11	46	46	13.4178	CP030092	4288603	4289284	22.3399	26.4	35	35	22.3399	CP030092	4288603	4289284	18.7	17.8788
DPH57_23200	-3.37729	-3.56723	0.015844	-3.29589	1	0.312385	35.3798	32.5	88	88	35.3798	CP030092	5383420	5383981	47.6679	52.4	66	66	47.6679	CP030092	5383420	5383981	42.45	41.5239	14.5175	11.9	41	41	14.5175	CP030092	5383420	5383981	10.0726	11.9	13	13	10.0726	CP030092	5383420	5383981	11.9	12.295
DPH57_08310	-3.19186	-3.07558	0.0164742	-3.26931	1	0.322983	18.3852	16.9	112	112	18.3852	CP030092	1971856	1973230	32.7326	36	111	111	32.7326	CP030092	1971856	1973230	26.45	25.5589	4.6263	3.8	32	32	4.6263	CP030092	1971856	1973230	11.3887	13.4	36	36	11.3887	CP030092	1971856	1973230	8.6	8.00752
DPH57_00735	-6.52632	-6.79927	0.0165664	-5.91794	1	0.322983	5.88839	5.4	112	112	5.88839	CP030092	157798	162088	164.621	180.9	1743	1743	164.621	CP030092	157798	162088	93.15	85.2546	9.30699	7.6	200	201	9.30699	CP030092	157798	162088	16.8194	19.8	166	166	16.8194	CP030092	157798	162088	13.7	13.0632
DPH57_09990	-3.38799	-3.16146	0.0165989	-3.81193	1	0.322983	789.176	723.9	1669	1669	789.176	CP030092	2363156	2363633	463.787	509.7	546	546	463.787	CP030092	2363156	2363633	616.8	626.482	127.431	104.3	306	306	127.431	CP030092	2363156	2363633	242.395	285.9	266	266	242.395	CP030092	2363156	2363633	195.1	184.913
DPH57_06160	-6.84242	-6.36401	0.0166197	-7.97428	1	0.322983	651.99	598.1	529	529	651.99	CP030092	1435629	1435812	22.1408	24.3	10	10	22.1408	CP030092	1435629	1435812	311.2	337.065	51.0173	41.8	47	47	51.0173	CP030092	1435629	1435812	47.505	56	20	20	47.505	CP030092	1435629	1435812	48.9	49.2611
DPH57_00995	-3.42568	-3.42105	0.0167411	-3.54999	1	0.324179	215.078	197.3	226	226	215.078	CP030092	218623	218860	181.218	199.2	106	106	181.218	CP030092	218623	218860	198.25	198.148	56.9942	46.7	68	68	56.9942	CP030092	218623	218860	58.6897	69.2	32	32	58.6897	CP030092	218623	218860	57.95	57.842
DPH57_10990	-3.17923	-3.17056	0.0168237	-3.29468	1	0.32462	95.8699	87.9	378	380	95.8699	CP030092	2587456	2588350	80.6728	88.7	178	178	80.6728	CP030092	2587456	2588350	88.3	88.2713	27.3299	22.4	123	123	27.3299	CP030092	2587456	2588350	28.2001	33.3	58	58	28.2001	CP030092	2587456	2588350	27.85	27.765
DPH57_05520	4.45671	4.35461	0.0170005	4.30619	1	0.326867	22.8011	20.9	37	37	22.8011	CP030092	1266011	1266377	6.64224	7.3	6	6	6.64224	CP030092	1266011	1266377	14.1	14.7217	88.4661	72.4	163	163	88.4661	CP030092	1266011	1266377	42.7545	50.4	36	36	42.7545	CP030092	1266011	1266377	61.4	65.6103
DPH57_10075	-8.48168	-9.3331	0.0171266	-8.49446	1	0.327421	2568.08	2355.7	11885	11887	2568.08	CP030092	2381242	2382286	293.792	322.9	757	757	293.792	CP030092	2381242	2382286	1339.3	1430.93	307.857	252.1	1618	1618	307.857	CP030092	2381242	2382286	29.5609	34.9	71	71	29.5609	CP030092	2381242	2382286	143.5	168.709
DPH57_14300	3.28149	3.23827	0.01715	3.28276	1	0.327421	6.19633	5.7	15	15	6.19633	CP030092	3380492	3381038	20.0362	22	27	27	20.0362	CP030092	3380492	3381038	13.85	13.1163	32.7431	26.8	90	90	32.7431	CP030092	3380492	3381038	53.3387	62.9	67	67	53.3387	CP030092	3380492	3381038	44.85	43.0409
DPH57_25675	-3.54145	-3.12667	0.0174307	-4.2676	1	0.329962	192.218	176.3	247	248	192.218	CP030092	6003341	6003632	52.9097	58.2	38	38	52.9097	CP030092	6003341	6003632	117.25	122.564	18.4307	15.1	27	27	18.4307	CP030092	6003341	6003632	50.7862	59.9	34	34	50.7862	CP030092	6003341	6003632	37.5	34.6085
DPH57_20575	5.90031	6.03448	0.017468	5.44138	1	0.329962	2.27825	2.1	11	11	2.27825	CP030092	4785431	4786520	0.744126	0.8	2	2	0.744126	CP030092	4785431	4786520	1.45	1.51119	9.85	8.1	54	54	9.85	CP030092	4785431	4786520	7.98293	9.4	20	20	7.98293	CP030092	4785431	4786520	8.75	8.91647
DPH57_11190	3.51034	3.64815	0.0175068	3.28968	1	0.329962	6.60942	6.1	40	40	6.60942	CP030092	2626010	2627375	9.20182	10.1	31	31	9.20182	CP030092	2626010	2627375	8.1	7.90562	17.6085	14.4	121	121	17.6085	CP030092	2626010	2627375	37.8944	44.7	119	119	37.8944	CP030092	2626010	2627375	29.55	27.7514
DPH57_06855	4.11769	4.07595	0.0175723	3.93309	1	0.329962	1.60817	1.5	4	4	1.60817	CP030092	1597213	1597774	5.77792	6.4	8	8	5.77792	CP030092	1597213	1597774	3.95	3.69305	10.2685	8.4	29	29	10.2685	CP030092	1597213	1597774	20.1452	23.8	26	26	20.1452	CP030092	1597213	1597774	16.1	15.2068
DPH57_00725	3.38677	3.35075	0.0176237	3.3139	1	0.329962	4.80963	4.4	19	19	4.80963	CP030092	155168	156059	8.18539	9	18	18	8.18539	CP030092	155168	156059	6.7	6.49751	19.6189	16.1	88	88	19.6189	CP030092	155168	156059	24.3923	28.8	50	50	24.3923	CP030092	155168	156059	22.45	22.0056
DPH57_16935	-4.74039	-4.56125	0.0176483	-4.76717	1	0.329962	32.589	29.9	215	215	32.589	CP030092	3957864	3959352	264.127	290.3	970	970	264.127	CP030092	3957864	3959352	160.1	148.358	10.0122	8.2	75	75	10.0122	CP030092	3957864	3959352	52.5811	62	180	180	52.5811	CP030092	3957864	3959352	35.1	31.2966
DPH57_22695	3.18801	3.0083	0.0177616	3.28829	1	0.330939	7.8513	7.2	31	33	7.8513	CP030092	5290362	5291310	15.3865	16.9	36	36	15.3865	CP030092	5290362	5291310	12.05	11.6189	41.0694	33.6	192	196	41.0694	CP030092	5290362	5291310	33.013	38.9	72	72	33.013	CP030092	5290362	5291310	36.25	37.0412
DPH57_21180	-3.21374	-3.09718	0.0178906	-3.42075	1	0.332202	261.938	240.3	655	655	261.938	CP030092	4924118	4924682	291.67	320.6	406	406	291.67	CP030092	4924118	4924682	280.45	276.804	61.2831	50.2	174	174	61.2831	CP030092	4924118	4924682	110.98	130.9	144	144	110.98	CP030092	4924118	4924682	90.55	86.1314
DPH57_17070	3.6197	3.07336	0.0182528	4.15089	1	0.33777	5.30698	4.9	2	2	5.30698	CP030092	3994668	3994753	19.0671	21	4	4	19.0671	CP030092	3994668	3994753	12.95	12.1871	67.7719	55.5	29	29	67.7719	CP030092	3994668	3994753	20.4551	24.1	4	4	20.4551	CP030092	3994668	3994753	39.8	44.1135
DPH57_12925	3.61768	3.38317	0.0183419	3.75848	1	0.338129	75.1822	69	79	79	75.1822	CP030092	3038883	3039120	82.0611	90.2	48	48	82.0611	CP030092	3038883	3039120	79.6	78.6216	367.11	300.6	438	438	367.11	CP030092	3038883	3039120	201.746	238	110	110	201.746	CP030092	3038883	3039120	269.3	284.428
DPH57_26100	-3.37345	-3.05411	0.0183969	-3.9338	1	0.338129	113.472	104.1	406	406	113.472	CP030092	6098609	6099416	33.6392	37	67	67	33.6392	CP030092	6098609	6099416	70.55	73.5556	14.5228	11.9	58	59	14.5228	CP030092	6098609	6099416	29.0858	34.3	54	54	29.0858	CP030092	6098609	6099416	23.1	21.8043
DPH57_26115	-3.24321	-2.94067	0.0185315	-3.77126	1	0.338882	194.12	178.1	803	803	194.12	CP030092	6101382	6102315	85.9861	94.5	198	198	85.9861	CP030092	6101382	6102315	136.3	140.053	25.3359	20.7	119	119	25.3359	CP030092	6101382	6102315	61.0309	72	131	131	61.0309	CP030092	6101382	6102315	46.35	43.1834
DPH57_20550	3.45431	3.60952	0.0185629	3.2318	1	0.338882	8.87243	8.1	19	19	8.87243	CP030092	4780385	4780868	11.7443	12.9	14	14	11.7443	CP030092	4780385	4780868	10.5	10.3083	22.6197	18.5	55	55	22.6197	CP030092	4780385	4780868	48.5967	57.3	54	54	48.5967	CP030092	4780385	4780868	37.9	35.6082
DPH57_19065	6.01277	6.58935	0.0187404	5.34307	1	0.339997	5.40231	5	24	24	5.40231	CP030092	4454089	4455091	19.4097	21.3	48	48	19.4097	CP030092	4454089	4455091	13.15	12.406	7.33507	6	37	37	7.33507	CP030092	4454089	4455091	141.854	167.3	327	327	141.854	CP030092	4454089	4455091	86.65	74.5943
DPH57_24400	-2.97147	-2.77992	0.0187494	-3.23548	1	0.339997	42.2146	38.7	105	105	42.2146	CP030092	5653355	5653916	30.3341	33.3	42	42	30.3341	CP030092	5653355	5653916	36	36.2743	8.14396	6.7	23	23	8.14396	CP030092	5653355	5653916	16.2711	19.2	21	21	16.2711	CP030092	5653355	5653916	12.95	12.2075
DPH57_08365	3.05721	2.83102	0.0196087	3.22572	1	0.354394	12.4831	11.5	44	44	12.4831	CP030092	1984211	1985006	22.4249	24.6	44	44	22.4249	CP030092	1984211	1985006	18.05	17.454	65.7142	53.8	263	263	65.7142	CP030092	1984211	1985006	41.0067	48.4	75	75	41.0067	CP030092	1984211	1985006	51.1	53.3604
DPH57_14355	3.6307	3.753	0.0198072	3.36593	1	0.356179	27.6476	25.4	171	171	27.6476	CP030092	3395438	3396833	14.8129	16.3	51	51	14.8129	CP030092	3395438	3396833	20.85	21.2303	70.3434	57.6	494	494	70.3434	CP030092	3395438	3396833	83.8182	98.9	269	269	83.8182	CP030092	3395438	3396833	78.25	77.0808
DPH57_08185	3.76532	3.36435	0.0198388	4.10108	1	0.356179	192.937	177	213	213	192.937	CP030092	1929371	1929620	245.71	270.1	151	151	245.71	CP030092	1929371	1929620	223.55	219.324	1230.94	1008	1543	1543	1230.94	CP030092	1929371	1929620	420.705	496.2	241	241	420.705	CP030092	1929371	1929620	752.1	825.823
DPH57_15170	-4.40897	-4.5	0.0199263	-4.15171	1	0.356569	8.60293	7.9	23	23	8.60293	CP030092	3579925	3580528	59.1303	65	88	88	59.1303	CP030092	3579925	3580528	36.45	33.8666	5.27076	4.3	16	16	5.27076	CP030092	3579925	3580528	10.0919	11.9	14	14	10.0919	CP030092	3579925	3580528	8.1	7.68131
DPH57_09520	-4.00687	-3.81579	0.0201116	-4.27304	1	0.3587	21.03	19.3	120	120	21.03	CP030092	2264805	2266092	8.81504	9.7	28	28	8.81504	CP030092	2264805	2266092	14.5	14.9225	3.39558	2.8	22	22	3.39558	CP030092	2264805	2266092	4.05287	4.8	12	12	4.05287	CP030092	2264805	2266092	3.8	3.72423
DPH57_23125	3.55379	3.56741	0.0207208	3.5756	1	0.368355	10.37	9.5	12	12	10.37	CP030092	5368497	5368758	52.7817	58	34	34	52.7817	CP030092	5368497	5368758	33.75	31.5758	66.2139	54.2	87	87	66.2139	CP030092	5368497	5368758	158.213	186.6	95	95	158.213	CP030092	5368497	5368758	120.4	112.214
DPH57_14550	-3.24508	-3.17101	0.0216733	-3.33429	1	0.384028	178.21	163.5	1152	1152	178.21	CP030092	3443814	3445272	360.713	396.5	1298	1298	360.713	CP030092	3443814	3445272	280	269.461	53.6796	44	394	394	53.6796	CP030092	3443814	3445272	112.394	132.6	377	377	112.394	CP030092	3443814	3445272	88.3	83.0369
DPH57_04250	-3.33822	-3.08861	0.0223979	-3.57082	1	0.395575	37.7932	34.7	186	187	37.7932	CP030092	953709	954825	101.657	111.7	280	280	101.657	CP030092	953709	954825	73.2	69.7252	5.16184	4.2	29	29	5.16184	CP030092	953709	954825	36.612	43.2	94	94	36.612	CP030092	953709	954825	23.7	20.8869
DPH57_11175	3.27137	2.96053	0.0225385	3.66297	1	0.396765	8.50274	7.8	19	19	8.50274	CP030092	2623281	2623785	48.2353	53	60	60	48.2353	CP030092	2623281	2623785	30.4	28.369	107.992	88.4	274	274	107.992	CP030092	2623281	2623785	77.6197	91.6	90	90	77.6197	CP030092	2623281	2623785	90	92.8057
DPH57_00490	-2.83277	-2.80142	0.0230411	-2.87632	1	0.403494	42.7761	39.2	99	99	42.7761	CP030092	103900	104422	72.1867	79.3	93	93	72.1867	CP030092	103900	104422	59.25	57.4814	15.6021	12.8	41	41	15.6021	CP030092	103900	104422	24.9811	29.5	30	30	24.9811	CP030092	103900	104422	21.15	20.2916
DPH57_08105	2.95002	2.83278	0.0230695	2.99403	1	0.403494	11.4615	10.5	83	84	11.4615	CP030092	1903218	1904871	17.6484	19.4	72	72	17.6484	CP030092	1903218	1904871	14.95	14.5549	45.9051	37.6	382	382	45.9051	CP030092	1903218	1904871	39.9697	47.1	152	152	39.9697	CP030092	1903218	1904871	42.35	42.9374
DPH57_18850	-3.03623	-2.81841	0.0232577	-3.42472	1	0.405476	84.3475	77.4	634	635	84.3475	CP030092	4395065	4396763	32.6909	35.9	137	137	32.6909	CP030092	4395065	4396763	56.65	58.5192	14.7402	12.1	126	126	14.7402	CP030092	4395065	4396763	23.807	28.1	93	93	23.807	CP030092	4395065	4396763	20.1	19.2736
DPH57_14560	-3.27712	-3.03253	0.0244916	-3.60548	1	0.42562	232.34	213.1	1025	1026	232.34	CP030092	3446613	3447609	399.888	439.5	983	983	399.888	CP030092	3446613	3447609	326.3	316.114	34.503	28.3	173	173	34.503	CP030092	3446613	3447609	158.419	186.9	363	363	158.419	CP030092	3446613	3447609	107.6	96.4611
DPH57_24025	-3.54521	-3.40205	0.0247565	-3.93177	1	0.42864	217.499	199.5	2134	2135	217.499	CP030092	5574887	5577101	60.2092	66.2	329	329	60.2092	CP030092	5574887	5577101	132.85	138.854	39.6566	32.5	442	442	39.6566	CP030092	5574887	5577101	38.6766	45.6	197	197	38.6766	CP030092	5574887	5577101	39.05	39.1666
DPH57_01950	-4.86371	-4.87678	0.025017	-5.28739	1	0.42864	101.171	92.8	218	218	101.171	CP030092	428547	429033	9.17067	10.1	11	11	9.17067	CP030092	428547	429033	51.45	55.1709	15.5317	12.7	38	38	15.5317	CP030092	428547	429033	7.15507	8.4	8	8	7.15507	CP030092	428547	429033	10.55	11.3434
DPH57_10710	2.9606	2.76652	0.0250532	3.08101	1	0.42864	6.8631	6.3	66	66	6.8631	CP030092	2528825	2530994	14.9443	16.4	80	80	14.9443	CP030092	2528825	2530994	11.35	10.9037	36.9076	30.2	401	403	36.9076	CP030092	2528825	2530994	27.6554	32.6	138	138	27.6554	CP030092	2528825	2530994	31.4	32.2815
DPH57_26150	Inf	Inf	0.0250799	48.87	1	0.42864	0	0	0	0	0	CP030092	6109588	6109665	0	0	0	0	0	CP030092	6109588	6109665	0	0	10.319	8.4	0	4	10.319	CP030092	6109588	6109665	0	0	0	0	0	CP030092	6109588	6109665	4.2	5.15952
DPH57_03285	-4.03633	-3.76786	0.0251782	-4.1129	1	0.42864	10.6026	9.7	44	44	10.6026	CP030092	732747	733683	10.3892	11.4	24	24	10.3892	CP030092	732747	733683	10.55	10.4959	1.48557	1.2	7	7	1.48557	CP030092	732747	733683	3.71513	4.4	8	8	3.71513	CP030092	732747	733683	2.8	2.60035
DPH57_22080	-2.79101	-2.8024	0.0252353	-2.84219	1	0.42864	63.263	58	138	138	63.263	CP030092	5140291	5140783	74.9412	82.4	91	91	74.9412	CP030092	5140291	5140783	70.2	69.1021	23.0134	18.8	57	57	23.0134	CP030092	5140291	5140783	26.5043	31.3	30	30	26.5043	CP030092	5140291	5140783	25.05	24.7588
DPH57_01120	Inf	Inf	0.0252641	49.5274	1	0.42864	0	0	0	0	0	CP030092	248023	248099	0	0	0	0	0	CP030092	248023	248099	0	0	10.4548	8.6	0	4	10.4548	CP030092	248023	248099	0	0	0	0	0	CP030092	248023	248099	4.3	5.22741
DPH57_14350	3.30597	3.41642	0.0252978	3.07541	1	0.42864	39.9633	36.7	219	219	39.9633	CP030092	3394163	3395399	27.5363	30.3	84	84	27.5363	CP030092	3394163	3395399	33.5	33.7498	95.1423	77.9	592	592	95.1423	CP030092	3394163	3395399	128.01	151	364	364	128.01	CP030092	3394163	3395399	114.45	111.576
DPH57_16850	-3.49535	-3.23723	0.0258994	-4.01049	1	0.436339	79.8567	73.3	410	410	79.8567	CP030092	3943131	3944289	13.9957	15.4	40	40	13.9957	CP030092	3943131	3944289	44.35	46.9262	11.8362	9.7	69	69	11.8362	CP030092	3943131	3944289	15.0145	17.7	40	40	15.0145	CP030092	3943131	3944289	13.7	13.4253
DPH57_18845	-2.75634	-2.65462	0.025917	-2.9776	1	0.436339	81.6611	74.9	605	605	81.6611	CP030092	4393313	4394984	52.1323	57.3	215	215	52.1323	CP030092	4393313	4394984	66.1	66.8967	20.4467	16.7	172	172	20.4467	CP030092	4393313	4394984	28.0936	33.1	108	108	28.0936	CP030092	4393313	4394984	24.9	24.2701
DPH57_24035	-2.7341	-2.6161	0.0259936	-2.95396	1	0.436339	51.3439	47.1	420	420	51.3439	CP030092	5577669	5579514	34.0392	37.4	155	155	34.0392	CP030092	5577669	5579514	42.25	42.6916	12.3815	10.1	115	115	12.3815	CP030092	5577669	5579514	18.8475	22.2	80	80	18.8475	CP030092	5577669	5579514	16.15	15.6145
DPH57_11035	3.97978	4.24787	0.0260937	3.68419	1	0.436376	83.0642	76.2	137	137	83.0642	CP030092	2594974	2595346	198.232	217.9	182	182	198.232	CP030092	2594974	2595346	147.05	140.648	197.574	161.8	370	370	197.574	CP030092	2594974	2595346	921.922	1087.5	789	789	921.922	CP030092	2594974	2595346	624.65	559.748
DPH57_11515	-2.78252	-2.65313	0.0261568	-3.00587	1	0.436376	124.454	114.2	293	293	124.454	CP030092	2699435	2699966	115.983	127.5	152	152	115.983	CP030092	2699435	2699966	120.85	120.218	29.9272	24.5	80	80	29.9272	CP030092	2699435	2699966	56.4826	66.6	69	69	56.4826	CP030092	2699435	2699966	45.55	43.2049
DPH57_05525	3.79317	3.54572	0.0269001	3.8371	1	0.4474	23.7507	21.8	139	139	23.7507	CP030092	1266396	1267716	11.0503	12.1	36	36	11.0503	CP030092	1266396	1267716	16.95	17.4005	98.4179	80.6	653	654	98.4179	CP030092	1266396	1267716	33.5882	39.6	102	102	33.5882	CP030092	1266396	1267716	60.1	66.0031
DPH57_09810	-2.78758	-2.66558	0.0270818	-3.01529	1	0.449044	134.838	123.7	330	330	134.838	CP030092	2328411	2328963	110.102	121	150	150	110.102	CP030092	2328411	2328963	122.35	122.47	32.7471	26.8	91	91	32.7471	CP030092	2328411	2328963	55.1213	65	70	70	55.1213	CP030092	2328411	2328963	45.9	43.9342
DPH57_12370	-3.71584	-4.05941	0.0276756	-3.5943	1	0.457491	17.9412	16.5	42	42	17.9412	CP030092	2900129	2900657	22.254	24.5	29	29	22.254	CP030092	2900129	2900657	20.5	20.0976	7.52431	6.2	20	20	7.52431	CP030092	2900129	2900657	3.29296	3.9	4	4	3.29296	CP030092	2900129	2900657	5.05	5.40863
DPH57_18315	3.91195	4.33613	0.027975	3.44425	1	0.459135	6.63372	6.1	9	9	6.63372	CP030092	4276360	4276666	5.29643	5.8	4	4	5.29643	CP030092	4276360	4276666	5.95	5.96507	9.73734	8	15	15	9.73734	CP030092	4276360	4276666	36.9328	43.6	26	26	36.9328	CP030092	4276360	4276666	25.8	23.3351
DPH57_26745	3.64628	4.00166	0.0279805	3.20217	1	0.459135	29.7331	27.3	140	140	29.7331	CP030092	6240491	6241553	30.1403	33.1	79	79	30.1403	CP030092	6240491	6241553	30.2	29.9367	43.9556	36	235	235	43.9556	CP030092	6240491	6241553	174.359	205.7	426	426	174.359	CP030092	6240491	6241553	120.85	109.157
DPH57_27070	-2.71853	-2.47754	0.0280291	-3.09569	1	0.459135	92.7481	85.1	132	132	92.7481	CP030092	6317906	6318227	58.0627	63.8	46	46	58.0627	CP030092	6317906	6318227	74.45	75.4054	14.8517	12.2	24	24	14.8517	CP030092	6317906	6318227	40.6234	47.9	30	30	40.6234	CP030092	6317906	6318227	30.05	27.7376
DPH57_10170	-3.14508	-3.32919	0.0284784	-3.09763	1	0.465091	55.6081	51	125	125	55.6081	CP030092	2405599	2406106	51.1466	56.2	64	64	51.1466	CP030092	2405599	2406106	53.6	53.3773	21.9407	18	56	56	21.9407	CP030092	2405599	2406106	12.0027	14.2	14	14	12.0027	CP030092	2405599	2406106	16.1	16.9717
DPH57_22185	-2.88634	-2.73548	0.0285977	-3.11378	1	0.465636	150.195	137.8	885	885	150.195	CP030092	5159182	5160511	183.229	201.4	601	601	183.229	CP030092	5159182	5160511	169.6	166.712	34.0785	27.9	228	228	34.0785	CP030092	5159182	5160511	81.4394	96.1	249	249	81.4394	CP030092	5159182	5160511	62	57.7589
DPH57_13235	3.49932	3.42327	0.0291725	3.66671	1	0.472459	24.1966	22.2	196	196	24.1966	CP030092	3100032	3101859	146.369	160.9	660	660	146.369	CP030092	3100032	3101859	91.55	85.2829	214.298	175.5	1971	1971	214.298	CP030092	3100032	3101859	382.567	451.3	1608	1608	382.567	CP030092	3100032	3101859	313.4	298.433
DPH57_02910	3.17003	3.20895	0.0292411	3.11401	1	0.472459	47.2321	43.3	267	267	47.2321	CP030092	637397	638672	102.963	113.2	324	324	102.963	CP030092	637397	638672	78.25	75.0973	164.522	134.7	1056	1056	164.522	CP030092	637397	638672	311.599	367.5	914	914	311.599	CP030092	637397	638672	251.1	238.061
DPH57_05245	3.58521	3.66729	0.0292781	3.54257	1	0.472459	71.3686	65.5	129	131	71.3686	CP030092	1206308	1206722	280.883	308.7	283	287	280.883	CP030092	1206308	1206722	187.1	176.126	325.312	266.4	665	678	325.312	CP030092	1206308	1206722	937.586	1105.9	884	893	937.586	CP030092	1206308	1206722	686.15	631.449
DPH57_11860	#NAME?	#NAME?	0.0293744	-44.7233	1	0.472606	9.39777	8.6	4	4	9.39777	CP030092	2780354	2780450	0	0	0	0	0	CP030092	2780354	2780450	4.3	4.69888	0	0	0	0	0	CP030092	2780354	2780450	0	0	0	0	0	CP030092	2780354	2780450	0	0
DPH57_17825	-2.88789	-2.92963	0.0296847	-2.94902	1	0.476184	84.7869	77.8	256	256	84.7869	CP030092	4165911	4166592	73.1817	80.4	123	123	73.1817	CP030092	4165911	4166592	79.1	78.9843	29.1691	23.9	100	100	29.1691	CP030092	4165911	4166592	25.5313	30.1	40	40	25.5313	CP030092	4165911	4166592	27	27.3502
DPH57_25775	2.9119	2.77982	0.0302951	2.95787	1	0.484544	8.02916	7.4	11	11	8.02916	CP030092	6024318	6024627	13.1125	14.4	10	10	13.1125	CP030092	6024318	6024627	10.9	10.5708	33.4284	27.4	52	52	33.4284	CP030092	6024318	6024627	28.134	33.2	20	20	28.134	CP030092	6024318	6024627	30.3	30.7812
DPH57_00140	-2.71433	-2.66008	0.0305594	-2.79007	1	0.487332	27.1334	24.9	48	48	27.1334	CP030092	28062	28461	38.5883	42.4	38	38	38.5883	CP030092	28062	28461	33.65	32.8608	8.96128	7.3	18	18	8.96128	CP030092	28062	28461	15.2516	18	14	14	15.2516	CP030092	28062	28461	12.65	12.1064
DPH57_05295	-2.82253	-2.7404	0.0309369	-3.03705	1	0.489923	96.8594	88.8	562	563	96.8594	CP030092	1216208	1217519	55.6307	61.1	180	180	55.6307	CP030092	1216208	1217519	74.95	76.245	24.8492	20.3	163	164	24.8492	CP030092	1216208	1217519	29.177	34.4	88	88	29.177	CP030092	1216208	1217519	27.35	27.0131
DPH57_09620	2.91768	2.68473	0.030974	3.0572	1	0.489923	7.45477	6.8	47	47	7.45477	CP030092	2290561	2291983	12.2522	13.5	43	43	12.2522	CP030092	2290561	2291983	10.15	9.85348	37.0183	30.3	265	265	37.0183	CP030092	2290561	2291983	20.4803	24.2	67	67	20.4803	CP030092	2290561	2291983	27.25	28.7493
DPH57_23215	-3.13997	-3.04425	0.0309929	-3.40849	1	0.489923	1127.09	1033.9	1754	1754	1127.09	CP030092	5386311	5386662	555.242	610.3	481	481	555.242	CP030092	5386311	5386662	822.1	841.166	254.669	208.5	450	450	254.669	CP030092	5386311	5386662	281.112	331.6	227	227	281.112	CP030092	5386311	5386662	270.05	267.89
DPH57_09985	-2.89651	-2.80299	0.0312689	-3.0827	1	0.492073	315.866	289.7	626	626	315.866	CP030092	2362713	2363160	316.346	347.7	348	349	316.346	CP030092	2362713	2363160	318.7	316.106	83.1007	68	187	187	83.1007	CP030092	2362713	2363160	135.166	159.4	139	139	135.166	CP030092	2362713	2363160	113.7	109.133
DPH57_11080	3.50508	3.58882	0.0313104	3.44548	1	0.492073	8.69158	8	80	80	8.69158	CP030092	2605677	2607753	48.0123	52.8	246	246	48.0123	CP030092	2605677	2607753	30.4	28.3519	45.0676	36.9	471	471	45.0676	CP030092	2605677	2607753	153.684	181.3	734	734	153.684	CP030092	2605677	2607753	109.1	99.3758
DPH57_09205	Inf	Inf	0.0316165	30.3581	1	0.495446	0	0	0	0	0	CP030092	2203665	2204004	0	0	0	0	0	CP030092	2203665	2204004	0	0	3.51578	2.9	6	6	3.51578	CP030092	2203665	2204004	3.84664	4.5	3	3	3.84664	CP030092	2203665	2204004	3.7	3.68121
DPH57_20035	-2.873	-2.98328	0.031785	-2.80147	1	0.496653	30.3277	27.8	119	119	30.3277	CP030092	4665579	4666464	55.8549	61.4	122	122	55.8549	CP030092	4665579	4666464	44.6	43.0913	15.2629	12.5	68	68	15.2629	CP030092	4665579	4666464	14.7346	17.4	30	30	14.7346	CP030092	4665579	4666464	14.95	14.9987
DPH57_24125	10.2949	11.7	0.0328724	8.6347	1	0.512168	7.0288	6.4	4	90	7.0288	CP030092	5594421	5597309	14.17	15.6	2	101	14.17	CP030092	5594421	5597309	11	10.5994	0	0	0	0	0	CP030092	5594421	5597309	218.238	257.4	6	1450	218.238	CP030092	5594421	5597309	128.7	109.119
DPH57_00010	-2.79953	-2.67672	0.0330551	-3.03287	1	0.513538	179.459	164.6	696	697	179.459	CP030092	376	1252	141.072	155	305	305	141.072	CP030092	376	1252	159.8	160.265	43.5379	35.7	192	192	43.5379	CP030092	376	1252	70.9565	83.7	143	143	70.9565	CP030092	376	1252	59.7	57.2472
DPH57_08140	-3.50603	-3.912	0.0333933	-3.3671	1	0.514781	23.9216	21.9	28	28	23.9216	CP030092	1914956	1915220	24.5562	27	16	16	24.5562	CP030092	1914956	1915220	24.45	24.2389	10.534	8.6	14	14	10.534	CP030092	1914956	1915220	3.29296	3.9	2	2	3.29296	CP030092	1914956	1915220	6.25	6.91349
DPH57_02570	-3.28296	-3.2834	0.0334009	-3.46944	1	0.514781	234.306	214.9	642	642	234.306	CP030092	565318	565936	99.6552	109.5	152	152	99.6552	CP030092	565318	565936	162.2	166.98	58.8211	48.2	183	183	58.8211	CP030092	565318	565936	42.9044	50.6	61	61	42.9044	CP030092	565318	565936	49.4	50.8627
DPH57_17410	-3.62804	-3.73002	0.0334199	-3.77646	1	0.514781	166.924	153.1	504	504	166.924	CP030092	4073626	4074307	51.7627	56.9	87	87	51.7627	CP030092	4073626	4074307	105	109.343	41.1285	33.7	141	141	41.1285	CP030092	4073626	4074307	19.1485	22.6	30	30	19.1485	CP030092	4073626	4074307	28.15	30.1385
DPH57_16630	-3.63001	-3.81818	0.0337979	-3.64545	1	0.519127	19.7776	18.1	146	146	19.7776	CP030092	3894851	3896516	14.1143	15.5	58	58	14.1143	CP030092	3894851	3896516	16.8	16.946	6.20382	5.1	52	52	6.20382	CP030092	3894851	3896516	3.13276	3.7	12	12	3.13276	CP030092	3894851	3896516	4.4	4.66829
DPH57_22495	11.2316	13.625	0.0340918	8.57861	1	0.522163	0.916856	0.8	1	1	0.916856	CP030092	5232144	5232390	0	0	0	0	0	CP030092	5232144	5232390	0.4	0.458428	3.22995	2.6	4	4	3.22995	CP030092	5232144	5232390	7.06781	8.3	4	4	7.06781	CP030092	5232144	5232390	5.45	5.14888
DPH57_20515	-3.0409	-3.10594	0.0344228	-3.09841	1	0.524906	153.633	140.9	188	188	153.633	CP030092	4773629	4773905	114.507	125.9	78	78	114.507	CP030092	4773629	4773905	133.4	134.07	50.3801	41.3	70	70	50.3801	CP030092	4773629	4773905	37.7974	44.6	24	24	37.7974	CP030092	4773629	4773905	42.95	44.0888
DPH57_20040	-3.07989	-3.31198	0.0344645	-2.96454	1	0.524906	73.8763	67.8	396	396	73.8763	CP030092	4666567	4667776	84.1186	92.5	251	251	84.1186	CP030092	4666567	4667776	80.15	78.9974	33.682	27.6	205	205	33.682	CP030092	4666567	4667776	17.6169	20.8	49	49	17.6169	CP030092	4666567	4667776	24.2	25.6495
DPH57_13240	3.43123	3.49091	0.0348254	3.41874	1	0.528918	88.8516	81.5	298	299	88.8516	CP030092	3101948	3102707	371.012	407.8	695	695	371.012	CP030092	3101948	3102707	244.65	229.932	424.502	347.6	1622	1622	424.502	CP030092	3101948	3102707	1153.39	1360.5	2014	2014	1153.39	CP030092	3101948	3102707	854.05	788.948
DPH57_00460	-5.63053	-6.66071	0.0351003	-4.87165	1	0.531524	4.3723	4	41	41	4.3723	CP030092	96228	98343	30.2685	33.3	158	158	30.2685	CP030092	96228	98343	18.65	17.3204	4.50818	3.7	48	48	4.50818	CP030092	96228	98343	1.64414	1.9	8	8	1.64414	CP030092	96228	98343	2.8	3.07616
DPH57_21270	-4.46406	-4.68293	0.0352052	-4.63082	1	0.531524	175.515	161	649	649	175.515	CP030092	4941529	4942363	28.1778	31	58	58	28.1778	CP030092	4941529	4942363	96	101.846	35.7269	29.3	150	150	35.7269	CP030092	4941529	4942363	9.90257	11.7	19	19	9.90257	CP030092	4941529	4942363	20.5	22.8147
DPH57_19015	-5.0531	-5.56889	0.0353761	-5.07819	1	0.531524	113.945	104.5	122	778	113.945	CP030092	4443359	4444899	18.9433	20.8	9	72	18.9433	CP030092	4443359	4444899	62.65	66.4441	23.4758	19.2	32	182	23.4758	CP030092	4443359	4444899	2.82254	3.3	2	10	2.82254	CP030092	4443359	4444899	11.25	13.1492
DPH57_21335	2.86467	2.825	0.0353892	2.84685	1	0.531524	3.56752	3.3	27	27	3.56752	CP030092	4964902	4966609	15.1912	16.7	64	64	15.1912	CP030092	4964902	4966609	10	9.37934	18.8518	15.4	162	162	18.8518	CP030092	4964902	4966609	34.8857	41.1	137	137	34.8857	CP030092	4964902	4966609	28.25	26.8687
DPH57_02625	5.20839	5.39007	0.0356876	4.71187	1	0.534525	15.3486	14.1	0	59	15.3486	CP030092	577375	578242	0	0	0	0	0	CP030092	577375	578242	7.05	7.6743	50.8633	41.7	8	222	50.8633	CP030092	577375	578242	29.0783	34.3	2	58	29.0783	CP030092	577375	578242	38	39.9708
DPH57_10575	2.78795	2.55754	0.0360529	2.95582	1	0.53851	15.5215	14.2	32	32	15.5215	CP030092	2497997	2498462	22.6551	24.9	26	26	22.6551	CP030092	2497997	2498462	19.55	19.0883	70.9129	58.1	166	166	70.9129	CP030092	2497997	2498462	35.5215	41.9	38	38	35.5215	CP030092	2497997	2498462	50	53.2172
DPH57_26730	3.5588	3.95833	0.0363692	3.08143	1	0.541645	15.9405	14.6	67	67	15.9405	CP030092	6236576	6237524	8.54804	9.4	20	20	8.54804	CP030092	6236576	6237524	12	12.2443	21.5824	17.7	103	103	21.5824	CP030092	6236576	6237524	65.5674	77.3	143	143	65.5674	CP030092	6236576	6237524	47.5	43.5749
DPH57_01505	4.51276	4.97619	0.0365816	4.00474	1	0.541645	2.23313	2	12	12	2.23313	CP030092	328834	330046	2.00583	2.2	6	6	2.00583	CP030092	328834	330046	2.1	2.11948	4.42519	3.6	26	27	4.42519	CP030092	328834	330046	14.7042	17.3	41	41	14.7042	CP030092	328834	330046	10.45	9.56469
DPH57_10510	3.18779	3.40433	0.0366091	2.92304	1	0.541645	22.6072	20.7	43	43	22.6072	CP030092	2483718	2484147	35.8898	39.4	38	38	35.8898	CP030092	2483718	2484147	30.05	29.2485	42.5991	34.9	92	92	42.5991	CP030092	2483718	2484147	143.877	169.7	142	142	143.877	CP030092	2483718	2484147	102.3	93.2381
DPH57_05800	3.01881	3.1165	0.0366624	2.85267	1	0.541645	46.2172	42.4	292	292	46.2172	CP030092	1342158	1343583	55.1609	60.6	194	194	55.1609	CP030092	1342158	1343583	51.5	50.6891	110.821	90.7	794	795	110.821	CP030092	1342158	1343583	195.22	230.3	640	640	195.22	CP030092	1342158	1343583	160.5	153.021
DPH57_09575	3.89225	3.48148	0.0367952	4.05327	1	0.54201	4.3614	4	21	21	4.3614	CP030092	2276567	2277653	3.73091	4.1	10	10	3.73091	CP030092	2276567	2277653	4.05	4.04615	24.693	20.2	135	135	24.693	CP030092	2276567	2277653	6.80423	8	16	17	6.80423	CP030092	2276567	2277653	14.1	15.7486
DPH57_26235	-5.78264	-7.24138	0.0368871	-5.15289	1	0.54201	5.93543	5.4	3	3	5.93543	CP030092	6125763	6125877	14.2167	15.6	4	4	14.2167	CP030092	6125763	6125877	10.5	10.0761	3.48494	2.9	2	2	3.48494	CP030092	6125763	6125877	0	0	0	0	0	CP030092	6125763	6125877	1.45	1.74247
DPH57_17830	-2.77113	-2.49248	0.0374823	-3.24307	1	0.549268	238.446	218.7	1183	1183	238.446	CP030092	4166775	4167894	132.524	145.7	366	366	132.524	CP030092	4166775	4167894	182.2	185.485	32.4856	26.6	183	183	32.4856	CP030092	4166775	4167894	101.384	119.6	261	261	101.384	CP030092	4166775	4167894	73.1	66.935
DPH57_19490	-2.65866	-2.63504	0.0380799	-2.76111	1	0.555124	38.1146	35	182	182	38.1146	CP030092	4555431	4556508	33.8588	37.2	90	90	33.8588	CP030092	4555431	4556508	36.1	35.9867	12.5419	10.3	68	68	12.5419	CP030092	4555431	4556508	14.5294	17.1	36	36	14.5294	CP030092	4555431	4556508	13.7	13.5356
DPH57_23870	-2.81136	-2.66323	0.0380867	-3.11473	1	0.555124	241.94	221.9	428	428	241.94	CP030092	5543305	5543704	126.935	139.5	125	125	126.935	CP030092	5543305	5543704	180.7	184.437	52.772	43.2	105	106	52.772	CP030092	5543305	5543704	78.4368	92.5	72	72	78.4368	CP030092	5543305	5543704	67.85	65.6044
DPH57_07075	-2.61335	-2.42857	0.0382328	-2.94581	1	0.55576	92.7388	85.1	655	655	92.7388	CP030092	1653896	1655489	41.7131	45.8	164	164	41.7131	CP030092	1653896	1655489	65.45	67.226	18.7045	15.3	150	150	18.7045	CP030092	1653896	1655489	32.7435	38.6	120	120	32.7435	CP030092	1653896	1655489	26.95	25.724
DPH57_21285	3.71135	3.92141	0.0384498	3.51169	1	0.557419	126.526	116.1	345	345	126.526	CP030092	4944245	4944860	422.306	464.1	641	641	422.306	CP030092	4944245	4944860	290.1	274.416	353.356	289.4	1094	1094	353.356	CP030092	4944245	4944860	1683.55	1985.8	2382	2382	1683.55	CP030092	4944245	4944860	1137.6	1018.45
DPH57_12460	3.5051	3.59082	0.0385692	3.45385	1	0.557659	5.83373	5.4	79	80	5.83373	CP030092	2924002	2927095	42.7054	46.9	326	326	42.7054	CP030092	2924002	2927095	26.15	24.2695	35.6438	29.2	554	555	35.6438	CP030092	2924002	2927095	134.491	158.6	957	957	134.491	CP030092	2924002	2927095	93.9	85.0672
DPH57_21405	3.15763	2.80073	0.0388063	3.64788	1	0.559595	3.7127	3.4	8	8	3.7127	CP030092	4981887	4982373	46.687	51.3	56	56	46.687	CP030092	4981887	4982373	27.35	25.1999	95.6423	78.3	234	234	95.6423	CP030092	4981887	4982373	63.5013	74.9	71	71	63.5013	CP030092	4981887	4982373	76.6	79.5718
DPH57_05530	4.21074	4.36	0.0391783	3.85412	1	0.563461	1.02989	0.9	4	4	1.02989	CP030092	1267913	1268789	3.70025	4.1	8	8	3.70025	CP030092	1267913	1268789	2.5	2.36507	4.5352	3.7	20	20	4.5352	CP030092	1267913	1268789	15.3822	18.1	31	31	15.3822	CP030092	1267913	1268789	10.9	9.95869
DPH57_15760	2.60193	2.54703	0.0396512	2.61118	1	0.567189	14.8665	13.6	35	35	14.8665	CP030092	3701071	3701602	24.4174	26.8	32	32	24.4174	CP030092	3701071	3701602	20.2	19.642	49.0058	40.1	131	131	49.0058	CP030092	3701071	3701602	53.2083	62.8	65	65	53.2083	CP030092	3701071	3701602	51.45	51.107
DPH57_23865	-3.13151	-3.15292	0.0397498	-3.26924	1	0.567189	1197.98	1098.9	5099	5099	1197.98	CP030092	5542338	5543298	628.446	690.7	1489	1489	628.446	CP030092	5542338	5543298	894.8	913.213	333.759	273.3	1613	1613	333.759	CP030092	5542338	5543298	249.483	294.3	551	551	249.483	CP030092	5542338	5543298	283.8	291.621
DPH57_04850	3.12183	3.13636	0.0397514	2.97461	1	0.567189	41.8573	38.4	260	260	41.8573	CP030092	1101111	1102512	23.1364	25.4	80	80	23.1364	CP030092	1101111	1102512	31.9	32.4969	108.891	89.2	768	768	108.891	CP030092	1101111	1102512	94.008	110.9	303	303	94.008	CP030092	1101111	1102512	100.05	101.45
DPH57_05470	7.9998	8.35294	0.0402361	6.85666	1	0.572599	0	0	0	0	0	CP030092	1254864	1255128	3.06952	3.4	2	2	3.06952	CP030092	1254864	1255128	1.7	1.53476	1.50486	1.2	2	2	1.50486	CP030092	1254864	1255128	23.0507	27.2	14	14	23.0507	CP030092	1254864	1255128	14.2	12.2778
DPH57_08205	2.79599	2.79006	0.0406364	2.79236	1	0.576781	6.8917	6.3	66	66	6.8917	CP030092	1933925	1936085	27.1994	29.9	145	145	27.1994	CP030092	1933925	1936085	18.1	17.0455	31.7275	26	345	345	31.7275	CP030092	1933925	1936085	63.5907	75	316	316	63.5907	CP030092	1933925	1936085	50.5	47.6591
DPH57_21620	4.01502	4.07547	0.0407827	3.79161	1	0.577346	3.6734	3.4	15	15	3.6734	CP030092	5036021	5036942	1.75973	1.9	4	4	1.75973	CP030092	5036021	5036942	2.65	2.71656	11.4311	9.4	53	53	11.4311	CP030092	5036021	5036942	10.383	12.2	22	22	10.383	CP030092	5036021	5036942	10.8	10.907
DPH57_21095	-3.01108	-2.9878	0.0409682	-3.21845	1	0.578463	74.7152	68.5	160	160	74.7152	CP030092	4902263	4902746	26.844	29.5	32	32	26.844	CP030092	4902263	4902746	49	50.7796	19.3295	15.8	47	47	19.3295	CP030092	4902263	4902746	14.399	17	16	16	14.399	CP030092	4902263	4902746	16.4	16.8643
DPH57_11905	-2.59644	-2.34002	0.0410954	-2.99	1	0.578725	126.87	116.4	405	405	126.87	CP030092	2788896	2789616	106.359	116.9	189	189	106.359	CP030092	2788896	2789616	116.65	116.614	17.3811	14.2	63	63	17.3811	CP030092	2788896	2789616	72.4451	85.5	120	120	72.4451	CP030092	2788896	2789616	49.85	44.9131
DPH57_20920	-3.87345	-4.10417	0.0412002	-3.8475	1	0.578725	11.2477	10.3	38	38	11.2477	CP030092	4863433	4864195	8.50765	9.4	16	16	8.50765	CP030092	4863433	4864195	9.85	9.87769	3.3889	2.8	13	13	3.3889	CP030092	4863433	4864195	1.7113	2	3	3	1.7113	CP030092	4863433	4864195	2.4	2.5501
DPH57_10105	-2.54337	-2.34548	0.0414571	-2.87503	1	0.580798	96.2613	88.3	137	137	96.2613	CP030092	2388986	2389307	54.276	59.7	43	43	54.276	CP030092	2388986	2389307	74	75.2686	18.5646	15.2	30	30	18.5646	CP030092	2388986	2389307	40.6234	47.9	30	30	40.6234	CP030092	2388986	2389307	31.55	29.594
DPH57_25185	2.92158	2.67773	0.0415621	3.05844	1	0.580798	8.58316	7.9	18	18	8.58316	CP030092	5866173	5866646	11.9925	13.2	14	14	11.9925	CP030092	5866173	5866646	10.55	10.2879	39.8963	32.7	95	95	39.8963	CP030092	5866173	5866646	20.2172	23.8	22	22	20.2172	CP030092	5866173	5866646	28.25	30.0568
DPH57_00055	-2.74663	-2.63644	0.0417979	-2.97826	1	0.58174	371.791	341	361	361	371.791	CP030092	8687	8906	266.418	292.8	144	144	266.418	CP030092	8687	8906	316.9	319.104	93.4251	76.5	103	103	93.4251	CP030092	8687	8906	138.936	163.9	70	70	138.936	CP030092	8687	8906	120.2	116.18
DPH57_10630	-2.50324	-2.36472	0.0418734	-2.68676	1	0.58174	73.0134	67	202	202	73.0134	CP030092	2507814	2508438	101.294	111.3	156	156	101.294	CP030092	2507814	2508438	89.15	87.1538	18.7818	15.4	59	59	18.7818	CP030092	2507814	2508438	50.8509	60	73	73	50.8509	CP030092	2507814	2508438	37.7	34.8164
DPH57_19395	-2.8019	-2.89673	0.0419514	-2.82096	1	0.58174	93.4751	85.7	465	465	93.4751	CP030092	4535374	4536496	75.113	82.6	208	208	75.113	CP030092	4535374	4536496	84.15	84.2941	35.7626	29.3	202	202	35.7626	CP030092	4535374	4536496	24.4066	28.8	63	63	24.4066	CP030092	4535374	4536496	29.05	30.0846
DPH57_08795	2.91516	2.95107	0.0420888	2.83618	1	0.582157	428.801	393.3	981	981	428.801	CP030092	2081918	2082434	646.241	710.3	823	823	646.241	CP030092	2081918	2082434	551.8	537.521	1219.18	998.3	3167	3167	1219.18	CP030092	2081918	2082434	1914.74	2258.5	2273	2273	1914.74	CP030092	2081918	2082434	1628.4	1566.96
DPH57_23780	2.78221	2.59524	0.0424642	2.95417	1	0.585854	3.68442	3.4	37	37	3.68442	CP030092	5519503	5521768	19.8563	21.8	111	111	19.8563	CP030092	5519503	5521768	12.6	11.7704	33.0631	27.1	377	377	33.0631	CP030092	5519503	5521768	32.4324	38.3	169	169	32.4324	CP030092	5519503	5521768	32.7	32.7477
DPH57_26130	-2.43905	-2.30024	0.0426931	-2.65446	1	0.587518	54.0102	49.5	250	250	54.0102	CP030092	6106067	6107111	43.4672	47.8	112	112	43.4672	CP030092	6106067	6107111	48.65	48.7387	13.3189	10.9	70	70	13.3189	CP030092	6106067	6107111	26.6465	31.4	64	64	26.6465	CP030092	6106067	6107111	21.15	19.9827
DPH57_21400	3.30153	3.02326	0.0430793	3.72086	1	0.591332	1.54062	1.4	10	10	1.54062	CP030092	4980427	4981891	41.7908	45.9	151	151	41.7908	CP030092	4980427	4981891	23.65	21.6657	71.5056	58.6	527	527	71.5056	CP030092	4980427	4981891	71.5544	84.4	241	241	71.5544	CP030092	4980427	4981891	71.5	71.53
DPH57_21090	-2.73883	-2.7035	0.0433593	-2.91786	1	0.592848	70.116	64.3	346	346	70.116	CP030092	4901150	4902263	32.7636	36	90	90	32.7636	CP030092	4901150	4902263	50.15	51.4398	19.9891	16.4	112	112	19.9891	CP030092	4901150	4902263	17.5743	20.7	45	45	17.5743	CP030092	4901150	4902263	18.55	18.7817
DPH57_03315	3.1385	3.29545	0.0434085	2.94179	1	0.592848	64.2604	58.9	253	253	64.2604	CP030092	739834	740722	114.526	125.9	251	251	114.526	CP030092	739834	740722	92.4	89.3934	146.521	120	655	655	146.521	CP030092	739834	740722	414.601	489	847	847	414.601	CP030092	739834	740722	304.5	280.561
DPH57_00305	-3.01414	-2.9158	0.0436661	-3.30506	1	0.594869	302.537	277.5	1171	1171	302.537	CP030092	62942	63815	103.499	113.8	223	223	103.499	CP030092	62942	63815	195.65	203.018	68.4893	56.1	301	301	68.4893	CP030092	62942	63815	66.2213	78.1	132	133	66.2213	CP030092	62942	63815	67.1	67.3553
DPH57_26535	-2.75509	-2.81579	0.044074	-2.73781	1	0.597686	15.8547	14.5	31	31	15.8547	CP030092	6192128	6192569	25.7255	28.3	28	28	25.7255	CP030092	6192128	6192569	21.4	20.7901	7.20695	5.9	16	16	7.20695	CP030092	6192128	6192569	7.88518	9.3	8	8	7.88518	CP030092	6192128	6192569	7.6	7.54607
DPH57_11005	2.56345	2.39894	0.0440934	2.66551	1	0.597686	14.245	13.1	54	54	14.245	CP030092	2590959	2591814	22.2729	24.5	47	47	22.2729	CP030092	2590959	2591814	18.8	18.259	55.9914	45.8	241	241	55.9914	CP030092	2590959	2591814	37.6206	44.4	74	74	37.6206	CP030092	2590959	2591814	45.1	46.806
DPH57_23635	2.95534	2.86869	0.0449089	2.90707	1	0.605843	3.00729	2.8	10	10	3.00729	CP030092	5482437	5483187	6.48283	7.1	12	12	6.48283	CP030092	5482437	5483187	4.95	4.74506	12.9779	10.6	49	49	12.9779	CP030092	5482437	5483187	15.0686	17.8	26	26	15.0686	CP030092	5482437	5483187	14.2	14.0233
DPH57_17470	5.94532	5.88889	0.0449187	5.62855	1	0.605843	3.90219	3.6	0	15	3.90219	CP030092	4084891	4085758	0	0	0	0	0	CP030092	4084891	4085758	1.8	1.95109	17.1835	14.1	0	75	17.1835	CP030092	4084891	4085758	6.0162	7.1	0	12	6.0162	CP030092	4084891	4085758	10.6	11.5999
DPH57_14585	-2.45859	-2.38961	0.0452875	-2.53656	1	0.609302	38.7751	35.6	261	262	38.7751	CP030092	3453197	3454721	68.0612	74.8	256	256	68.0612	CP030092	3453197	3454721	55.2	53.4181	14.077	11.5	108	108	14.077	CP030092	3453197	3454721	29.3773	34.7	103	103	29.3773	CP030092	3453197	3454721	23.1	21.7272
DPH57_05095	2.64583	2.70536	0.045718	2.54015	1	0.613572	16.6708	15.3	153	153	16.6708	CP030092	1165779	1167849	26.8161	29.5	137	137	26.8161	CP030092	1165779	1167849	22.4	21.7434	40.3041	33	419	420	40.3041	CP030092	1165779	1167849	74.7549	88.2	356	356	74.7549	CP030092	1165779	1167849	60.6	57.5295
DPH57_09550	3.03031	2.62422	0.0458572	3.36827	1	0.61392	19.8208	18.2	29	29	19.8208	CP030092	2273559	2273889	27.0118	29.7	22	22	27.0118	CP030092	2273559	2273889	23.95	23.4163	115.573	94.6	192	192	115.573	CP030092	2273559	2273889	26.3437	31.1	20	20	26.3437	CP030092	2273559	2273889	62.85	70.9585
DPH57_02165	-2.79296	-2.62281	0.0464046	-2.96407	1	0.619719	17.0738	15.7	119	119	17.0738	CP030092	474967	476539	12.8873	14.2	50	50	12.8873	CP030092	474967	476539	14.95	14.9806	3.53815	2.9	28	28	3.53815	CP030092	474967	476539	7.18921	8.5	26	26	7.18921	CP030092	474967	476539	5.7	5.36368
DPH57_11290	-4.00689	-3.80727	0.0465912	-4.06927	1	0.620681	15.7097	14.4	14	14	15.7097	CP030092	2650463	2650664	177.391	195	88	88	177.391	CP030092	2650463	2650664	104.7	96.5503	4.94134	4	5	5	4.94134	CP030092	2650463	2650664	43.2508	51	20	20	43.2508	CP030092	2650463	2650664	27.5	24.0961
DPH57_07250	6.35549	6.375	0.0471725	5.4787	1	0.626885	0.416522	0.4	4	4	0.416522	CP030092	1695217	1697383	1.12237	1.2	6	6	1.12237	CP030092	1695217	1697383	0.8	0.769448	3.76007	3.1	41	41	3.76007	CP030092	1695217	1697383	6.02037	7.1	30	30	6.02037	CP030092	1695217	1697383	5.1	4.89022
DPH57_09605	-2.87487	-3.02075	0.0475275	-2.85807	1	0.630059	89.4573	82.1	188	188	89.4573	CP030092	2287117	2287591	70.9487	78	83	83	70.9487	CP030092	2287117	2287591	80.05	80.203	35.6214	29.2	85	85	35.6214	CP030092	2287117	2287591	20.1746	23.8	22	22	20.1746	CP030092	2287117	2287591	26.5	27.898
DPH57_15000	3.05	2.93675	0.0480249	3.03983	1	0.634807	102.138	93.7	485	485	102.138	CP030092	3544665	3545736	73.0151	80.2	193	193	73.0151	CP030092	3544665	3545736	86.95	87.5766	330.884	270.9	1784	1784	330.884	CP030092	3544665	3545736	203.333	239.8	501	501	203.333	CP030092	3544665	3545736	255.35	267.109
DPH57_14555	-2.6256	-2.44394	0.0481198	-2.8804	1	0.634807	152.945	140.3	889	889	152.945	CP030092	3445301	3446612	215.414	236.8	697	697	215.414	CP030092	3445301	3446612	188.55	184.18	31.213	25.6	206	206	31.213	CP030092	3445301	3446612	109.082	128.7	329	329	109.082	CP030092	3445301	3446612	77.15	70.1475
DPH57_06815	2.52301	2.44928	0.0488354	2.55047	1	0.642684	24.4222	22.4	51	51	24.4222	CP030092	1587373	1587844	36.1304	39.7	42	42	36.1304	CP030092	1587373	1587844	31.05	30.2763	78.0227	63.9	184	185	78.0227	CP030092	1587373	1587844	74.7523	88.2	81	81	74.7523	CP030092	1587373	1587844	76.05	76.3875
DPH57_23360	2.82744	2.94715	0.0490367	2.63498	1	0.643647	14.2188	13	80	80	14.2188	CP030092	5420336	5421605	10.5365	11.6	33	33	10.5365	CP030092	5420336	5421605	12.3	12.3777	27.8631	22.8	178	178	27.8631	CP030092	5420336	5421605	42.1312	49.7	123	123	42.1312	CP030092	5420336	5421605	36.25	34.9971
DPH57_02155	-2.66808	-2.49254	0.0491461	-2.95057	1	0.643647	36.266	33.3	260	260	36.266	CP030092	471754	473371	15.285	16.8	61	61	15.285	CP030092	471754	473371	25.05	25.7755	7.49359	6.1	60	61	7.49359	CP030092	471754	473371	11.8278	14	44	44	11.8278	CP030092	471754	473371	10.05	9.66068
DPH57_06210	-2.73102	-2.61658	0.0494754	-2.97286	1	0.645935	37.5221	34.4	271	272	37.5221	CP030092	1443634	1445269	14.6211	16.1	59	59	14.6211	CP030092	1443634	1445269	25.25	26.0716	8.99051	7.4	74	74	8.99051	CP030092	1443634	1445269	10.1024	11.9	38	38	10.1024	CP030092	1443634	1445269	9.65	9.54647
DPH57_02980	2.56643	2.60998	0.049559	2.47098	1	0.645935	22.4334	20.6	220	222	22.4334	CP030092	657938	660170	30.4972	33.5	168	168	30.4972	CP030092	657938	660170	27.05	26.4653	52.6863	43.1	590	592	52.6863	CP030092	657938	660170	83.1561	98.1	427	427	83.1561	CP030092	657938	660170	70.6	67.9212
DPH57_02205	8.13362	8	0.0498788	7.1886	1	0.648544	1.48876	1.4	4	4	1.48876	CP030092	485529	486135	0	0	0	0	0	CP030092	485529	486135	0.7	0.744378	8.52258	7	26	26	8.52258	CP030092	485529	486135	3.58639	4.2	4	5	3.58639	CP030092	485529	486135	5.6	6.05449

## Sheet: DeepBGC identification
In silico prediction of biosynthesis gene cluster in Massilia sp. YMA4 by DeepBGC
sequence_id	detector	detector_version	detector_label	bgc_candidate_id	nucl_start	nucl_end	nucl_length	num_proteins	num_domains	num_bio_domains	deepbgc_score	product_activity	antibacterial	cytotoxic	inhibitor	antifungal	product_class	Alkaloid	NRP	Other	Polyketide	RiPP	Saccharide	Terpene	protein_ids	bio_pfam_ids	pfam_ids
CP030092.1	deepbgc	0.1.0	deepbgc	CP030092.1_111323-113367.1	111323	113367	2044	3	6	0	0.57972	antibacterial	0.83	0.06	0.18	0.23		0	0.1	0.07	0.33	0.2	0.03	0.32	AXA89790.1;AXA89791.1;AXA89792.1		PF07589;PF07589;PF06445;PF14526;PF12833;PF00165
CP030092.1	deepbgc	0.1.0	deepbgc	CP030092.1_578723-586975.1	578723	586975	8252	10	19	8	0.76079	antibacterial	0.68	0.21	0.19	0.15	Polyketide	0	0.17	0.07	0.77	0.02	0.02	0.03	AXA90163.1;AXA90164.1;AXA90165.1;AXA90166.1;AXA90167.1;AXA90168.1;AXA90169.1;AXA90170.1;AXA90171.1;AXA90172.1	PF02801;PF00109;PF08659;PF08541;PF00108;PF08545;PF00698;PF00106	PF00590;PF02545;PF02620;PF01783;PF02504;PF00108;PF08392;PF08545;PF08541;PF00698;PF00106;PF08659;PF13561;PF00550;PF14573;PF10501;PF00109;PF00108;PF02801
CP030092.1	deepbgc	0.1.0	deepbgc	CP030092.1_1049016-1049406.1	1049016	1049406	390	1	1	0	0.5043	antibacterial	0.87	0.06	0.17	0.26		0	0.09	0.07	0.33	0.21	0.03	0.32	AXA90526.1		PF14107
CP030092.1	deepbgc	0.1.0	deepbgc	CP030092.1_1400550-1405829.1	1400550	1405829	5279	5	18	4	0.6325		0.32	0.46	0.08	0.02	Terpene	0.08	0	0.05	0.14	0	0.29	0.73	AXA90770.1;AXA94583.1;AXA94584.1;AXA90771.1;AXA90772.1	PF01266;PF01494;PF01593;PF00494	PF03486;PF00890;PF07992;PF01494;PF13450;PF10988;PF08006;PF01593;PF01266;PF01494;PF13450;PF12831;PF03486;PF00890;PF00070;PF07992;PF01134;PF00494
CP030092.1	deepbgc	0.1.0	deepbgc	CP030092.1_1599571-1601756.1	1599571	1601756	2185	2	6	1	0.58942	antibacterial	0.81	0.11	0.04	0.06		0	0.16	0.33	0.5	0.02	0.02	0	AXA90908.1;AXA90909.1	PF00501	PF13193;PF00501;PF01638;PF13463;PF01047;PF12802
CP030092.1	deepbgc	0.1.0	deepbgc	CP030092.1_1626304-1628301.1	1626304	1628301	1997	2	2	0	0.55315	antibacterial	0.87	0.06	0.17	0.26		0	0.09	0.07	0.33	0.21	0.03	0.32	AXA90925.1;AXA90926.1		PF05943;PF05591
CP030092.1	deepbgc	0.1.0	deepbgc	CP030092.1_1641068-1641977.1	1641068	1641977	909	1	3	0	0.52043	antibacterial	0.8	0.09	0.14	0.25		0	0.07	0.08	0.33	0.28	0.01	0.26	AXA90937.1		PF12146;PF00756;PF00326
CP030092.1	deepbgc	0.1.0	deepbgc	CP030092.1_1810695-1812588.1	1810695	1812588	1893	1	6	0	0.51084	antibacterial	0.81	0.06	0.16	0.29		0	0.09	0.07	0.32	0.22	0.03	0.32	AXA91068.1		PF05762;PF00092;PF13768;PF13519;PF07728;PF01078
CP030092.1	deepbgc	0.1.0	deepbgc	CP030092.1_1933925-1973230.1	1933925	1973230	39305	22	44	9	0.86032	antibacterial	0.54	0.16	0.06	0.21	NRP	0	0.94	0.02	0.07	0	0.01	0.01	AXA94630.1;AXA91144.1;AXA91145.1;AXA91146.1;AXA94631.1;AXA91147.1;AXA91148.1;AXA91149.1;AXA91150.1;AXA91151.1;AXA91152.1;AXA91153.1;AXA94632.1;AXA91154.1;AXA91155.1;AXA91156.1;AXA91157.1;AXA91158.1;AXA91159.1;AXA91160.1;AXA91161.1;AXA94633.1	PF01757;PF04321;PF01370;PF00857;PF08659;PF00668;PF00501;PF00975;PF00106	PF00232;PF04321;PF01370;PF16363;PF01757;PF01904;PF05977;PF07690;PF13347;PF00975;PF00550;PF13193;PF00501;PF00668;PF03621;PF00756;PF00326;PF11806;PF03929;PF11804;PF00873;PF00529;PF16576;PF13437;PF13533;PF13561;PF00106;PF08659;PF01370;PF02826;PF00550;PF00857;PF13193;PF00501;PF00425;PF00593;PF14905;PF07715;PF06594;PF00544;PF00654;PF07731;PF00394;PF07732
CP030092.1	deepbgc	0.1.0	deepbgc	CP030092.1_2152502-2202525.1	2152502	2202525	50023	16	41	4	0.84252	antibacterial	0.55	0.05	0.09	0.24	NRP	0	0.87	0.01	0.05	0.09	0.02	0	AXA91297.1;AXA91298.1;AXA91299.1;AXA91300.1;AXA91301.1;AXA94654.1;AXA91302.1;AXA91303.1;AXA91304.1;AXA91305.1;AXA91306.1;AXA91307.1;AXA91308.1;AXA91309.1;AXA91310.1;AXA91311.1	PF00668;PF02668;PF00975;PF00501	PF12697;PF01738;PF12740;PF03403;PF07224;PF02668;PF02668;PF12697;PF00975;PF13193;PF00501;PF00668;PF00550;PF00550;PF13193;PF00501;PF00668;PF13193;PF00550;PF00668;PF00501;PF07690;PF05977;PF02781;PF00479;PF02463;PF13175;PF13304;PF05593;PF03527;PF15652;PF16576;PF13437;PF00529;PF13533;PF03412;PF00664;PF00005;PF13555;PF03193;PF02463
CP030092.1	deepbgc	0.1.0	deepbgc	CP030092.1_2306260-2309366.1	2306260	2309366	3106	4	19	2	0.69605	cytotoxic	0.3	0.57	0.19	0.03		0.08	0.03	0.37	0.04	0.2	0	0.29	AXA91402.1;AXA91403.1;AXA91404.1;AXA91405.1	PF08241;PF08242	PF08003;PF01209;PF06325;PF07021;PF13489;PF05401;PF05724;PF02353;PF05175;PF13847;PF03848;PF05148;PF13649;PF08241;PF08242;PF14559;PF13396;PF07273;PF01904
CP030092.1	deepbgc	0.1.0	deepbgc	CP030092.1_2370090-2371980.1	2370090	2371980	1890	2	2	0	0.52465	antibacterial	0.87	0.06	0.17	0.26		0	0.09	0.07	0.33	0.21	0.03	0.32	DPH57_10015;AXA91455.1		PF07589;PF07589
CP030092.1	deepbgc	0.1.0	deepbgc	CP030092.1_2846650-2892086.1	2846650	2892086	45436	36	93	18	0.87077	antibacterial	0.52	0.2	0.2	0.12	Saccharide	0.01	0.02	0.05	0.06	0	0.9	0	AXA91826.1;AXA91827.1;AXA91828.1;AXA91829.1;AXA91830.1;AXA91831.1;AXA94697.1;AXA91832.1;AXA91833.1;AXA91834.1;AXA91835.1;AXA91836.1;AXA91837.1;AXA91838.1;AXA91839.1;AXA91840.1;AXA91841.1;AXA91842.1;AXA91843.1;AXA91844.1;AXA91845.1;AXA91846.1;AXA91847.1;AXA91848.1;AXA91849.1;AXA91850.1;AXA94698.1;AXA91851.1;AXA91852.1;AXA91853.1;AXA91854.1;AXA91855.1;AXA91856.1;AXA91857.1;AXA91858.1;AXA91859.1	PF04932;PF07993;PF04321;PF01370;PF01943;PF02706;PF02397;PF02563;PF08659;PF00534;PF02719;PF00483;PF03720;PF00984;PF00535;PF01050;PF03721;PF00106	PF00482;PF08334;PF07963;PF00196;PF08281;PF04545;PF07589;PF03372;PF00932;PF07589;PF07589;PF07589;PF04151;PF01050;PF07883;PF02311;PF00483;PF12804;PF00132;PF00483;PF12804;PF16363;PF01370;PF02719;PF07993;PF04321;PF13460;PF01073;PF08659;PF00106;PF13561;PF05368;PF03435;PF02558;PF02254;PF03721;PF13524;PF00534;PF13692;PF13439;PF13579;PF13477;PF03720;PF00984;PF03721;PF07940;PF16889;PF05426;PF13524;PF00534…
CP030092.1	deepbgc	0.1.0	deepbgc	CP030092.1_2894556-2895543.1	2894556	2895543	987	1	1	0	0.59181	antibacterial	0.87	0.06	0.17	0.26		0	0.07	0.05	0.33	0.18	0.13	0.28	AXA91861.1		PF16822
CP030092.1	deepbgc	0.1.0	deepbgc	CP030092.1_2996595-2999679.1	2996595	2999679	3084	3	8	1	0.71897	antibacterial	0.75	0.07	0.14	0.28		0.01	0.09	0.25	0.27	0.17	0.03	0.24	AXA91937.1;AXA91938.1;AXA91939.1	PF00702	PF00702;PF13419;PF12710;PF13242;PF01527;PF13022;PF13518;PF13551
CP030092.1	deepbgc	0.1.0	deepbgc	CP030092.1_3006895-3017149.1	3006895	3017149	10254	4	13	0	0.68413	antibacterial	0.78	0.05	0.12	0.23	RiPP	0	0.03	0.04	0	0.92	0.01	0	AXA94705.1;AXA91944.1;AXA91945.1;AXA91946.1		PF06594;PF00353;PF03412;PF00664;PF00005;PF13555;PF13191;PF02463;PF00529;PF16576;PF13533;PF13437;PF07589
CP030092.1	deepbgc	0.1.0	deepbgc	CP030092.1_3471897-3496344.1	3471897	3496344	24447	24	69	15	0.94935	cytotoxic	0.49	0.63	0.12	0.13	NRP-Polyketide	0	0.67	0.11	0.62	0.02	0.01	0.02	AXA92273.1;AXA92274.1;AXA92275.1;AXA92276.1;AXA92277.1;AXA92278.1;AXA92279.1;AXA92280.1;AXA92281.1;AXA92282.1;AXA92283.1;AXA92284.1;AXA92285.1;AXA92286.1;AXA92287.1;AXA92288.1;AXA92289.1;AXA92290.1;AXA92291.1;AXA92292.1;AXA92293.1;AXA92294.1;AXA92295.1;AXA92296.1	PF02801;PF01593;PF01266;PF08028;PF01494;PF00109;PF08659;PF02771;PF00668;PF00108;PF00501;PF00975;PF01050;PF00441;PF00106	PF03884;PF01648;PF00196;PF04545;PF08281;PF04967;PF12840;PF13518;PF03472;PF08028;PF00441;PF02771;PF00190;PF02311;PF07883;PF01050;PF05899;PF13193;PF00501;PF00668;PF00550;PF16197;PF02801;PF00109;PF00108;PF07876;PF12697;PF00975;PF00550;PF16197;PF02801;PF00109;PF00108;PF07366;PF12680;PF01841;PF13471;PF00550;PF00501;PF14667;PF01554;PF13561;PF00106;PF08659;PF13561;PF00106;PF08659;PF02801;PF00109;PF00108…
CP030092.1	deepbgc	0.1.0	deepbgc	CP030092.1_4209253-4221415.1	4209253	4221415	12162	9	9	3	0.74363	antibacterial	0.79	0.02	0.18	0.14	RiPP	0	0.05	0.01	0.3	0.66	0	0	AXA92876.1;AXA92877.1;AXA92878.1;AXA92879.1;AXA92880.1;AXA92881.1;AXA92882.1;AXA92883.1;AXA92884.1	PF04738;PF00107;PF08240	PF14028;PF02687;PF12704;PF13602;PF00107;PF08240;PF01554;PF04738;PF02624
CP030092.1	deepbgc	0.1.0	deepbgc	CP030092.1_4445335-4446808.1	4445335	4446808	1473	1	3	1	0.50094	antibacterial	0.89	0.06	0.17	0.22		0	0.03	0.37	0.09	0.36	0.01	0.16	AXA93045.1	PF04055	PF02310;PF04055;PF13311
CP030092.1	deepbgc	0.1.0	deepbgc	CP030092.1_4457242-4475853.1	4457242	4475853	18611	17	43	5	0.84255		0.46	0.04	0.37	0.21	Saccharide	0.01	0.08	0.15	0.01	0.05	0.69	0.01	AXA93057.1;AXA93058.1;AXA93059.1;AXA94799.1;AXA93060.1;AXA94800.1;AXA93061.1;AXA93062.1;AXA93063.1;AXA94801.1;AXA93064.1;AXA93065.1;AXA93066.1;AXA93067.1;AXA93068.1;AXA93069.1;AXA93070.1	PF04932;PF01943;PF02350;PF00534;PF00501	PF15902;PF02597;PF00111;PF13510;PF14667;PF13440;PF01943;PF01522;PF04932;PF00501;PF13524;PF00534;PF13692;PF13439;PF13579;PF13524;PF00534;PF13692;PF13439;PF13579;PF13477;PF00733;PF06508;PF13537;PF12481;PF13522;PF13524;PF00534;PF13692;PF13439;PF13579;PF13477;PF11984;PF09721;PF13524;PF13692;PF13579;PF04339;PF13480;PF02388;PF11959;PF01522;PF02350
CP030092.1	deepbgc	0.1.0	deepbgc	CP030092.1_4498572-4500162.1	4498572	4500162	1590	1	2	1	0.54111	antibacterial	0.92	0.01	0.04	0.07	Polyketide	0	0.23	0.23	0.54	0	0	0	AXA93090.1	PF00501	PF13193;PF00501
CP030092.1	deepbgc	0.1.0	deepbgc	CP030092.1_4502791-4504749.1	4502791	4504749	1958	3	6	0	0.53465	antibacterial	0.56	0.08	0.32	0.22		0	0.25	0.27	0.33	0.09	0.01	0.05	AXA93093.1;AXA93094.1;AXA93095.1		PF00550;PF12697;PF02129;PF12146;PF12697;PF12146
CP030092.1	deepbgc	0.1.0	deepbgc	CP030092.1_4628594-4630174.1	4628594	4630174	1580	3	6	0	0.60461	antibacterial	0.85	0.12	0.15	0.26		0	0.09	0.06	0.39	0.2	0.03	0.28	AXA93201.1;AXA93202.1;AXA93203.1		PF00893;PF15138;PF08964;PF03995;PF08327;PF10604
CP030092.1	deepbgc	0.1.0	deepbgc	CP030092.1_4714928-4716656.1	4714928	4716656	1728	1	1	0	0.50703	antibacterial	0.87	0.06	0.17	0.26		0	0.09	0.07	0.34	0.2	0.03	0.32	AXA93276.1		PF07730
CP030092.1	deepbgc	0.1.0	deepbgc	CP030092.1_4726995-4727532.1	4726995	4727532	537	1	2	0	0.58471	antibacterial	0.87	0.06	0.17	0.26		0	0.09	0.07	0.33	0.21	0.03	0.32	AXA93288.1		PF05163;PF12867
CP030092.1	deepbgc	0.1.0	deepbgc	CP030092.1_4995634-4998129.1	4995634	4998129	2495	2	13	6	0.55262	antibacterial	0.67	0.1	0.18	0.33	Polyketide	0.05	0.07	0.2	0.5	0.02	0.18	0	AXA93484.1;AXA93485.1	PF07993;PF04321;PF01370;PF08659;PF02719;PF00106	PF13533;PF00529;PF13437;PF00106;PF04321;PF08659;PF02719;PF01370;PF05368;PF01073;PF16363;PF07993;PF13460
CP030092.1	deepbgc	0.1.0	deepbgc	CP030092.1_5003563-5013398.1	5003563	5013398	9835	7	14	2	0.54943	antibacterial	0.56	0.16	0.38	0.06		0.01	0.22	0.47	0.3	0.08	0.06	0.06	AXA93490.1;AXA93491.1;AXA93492.1;AXA93493.1;AXA93494.1;AXA93495.1;AXA93496.1	PF00583;PF01041	PF01041;PF01212;PF13302;PF00583;PF13523;PF01425;PF05711;PF13578;PF13844;PF07719;PF00515;PF13424;PF13374;PF13431
CP030092.1	deepbgc	0.1.0	deepbgc	CP030092.1_5120368-5135280.1	5120368	5135280	14912	14	38	8	0.72203		0.41	0.25	0.13	0.12	Terpene	0.05	0.06	0.12	0.09	0.03	0.1	0.66	AXA93579.1;AXA93580.1;AXA93581.1;AXA94848.1;AXA93582.1;AXA93583.1;AXA93584.1;AXA93585.1;AXA93586.1;AXA93587.1;AXA93588.1;AXA93589.1;AXA93590.1;AXA94849.1	PF04101;PF00561;PF01593;PF01266;PF01494;PF03033;PF00348;PF00494	PF00348;PF03033;PF00201;PF04101;PF05834;PF13450;PF00070;PF07992;PF03486;PF01266;PF00890;PF12831;PF01494;PF13450;PF01593;PF00494;PF04116;PF09912;PF00561;PF12146;PF12697;PF08386;PF08448;PF00989;PF13188;PF13426;PF08447;PF00512;PF02518;PF00072;PF13683;PF00665;PF13565;PF13011;PF13551;PF13518;PF13384;PF07883
CP030092.1	deepbgc	0.1.0	deepbgc	CP030092.1_5387863-5402034.1	5387863	5402034	14171	14	26	7	0.72275		0.46	0.18	0.19	0.33	Polyketide (Polyyne)	0	0.32	0.22	0.53	0.03	0.01	0.03	AXA93797.1;AXA93798.1;AXA93799.1;AXA93800.1;AXA94869.1;AXA93801.1;AXA93802.1;AXA93803.1;AXA93804.1;AXA93805.1;AXA93806.1;AXA93807.1;AXA93808.1;AXA93809.1	PF00561;PF02803;PF00109;PF00108;PF00501;PF00378;PF00355	PF00487;PF00355;PF00501;PF14535;PF00487;PF00487;PF00550;PF00487;PF00561;PF12146;PF12697;PF06821;PF07859;PF03959;PF07819;PF08386;PF00301;PF00561;PF12146;PF12697;PF00108;PF00109;PF02803;PF00378;PF16113;PF04909
CP030092.1	deepbgc	0.1.0	deepbgc	CP030092.1_5422106-5427315.1	5422106	5427315	5209	6	17	2	0.79148		0.39	0.4	0.2	0.04		0.07	0.01	0.36	0.05	0.26	0	0.25	AXA93826.1;AXA93827.1;AXA94870.1;AXA93828.1;AXA93829.1;AXA93830.1	PF08241;PF08242	PF01209;PF13489;PF13847;PF13649;PF08241;PF08242;PF03141;PF05148;PF04280;PF02036;PF03109;PF05724;PF08241;PF13489;PF08242;PF13649;PF09723
CP030092.1	deepbgc	0.1.0	deepbgc	CP030092.1_5762050-5768633.1	5762050	5768633	6583	4	10	1	0.74026	antibacterial	0.54	0.1	0.15	0.16	Saccharide	0	0.01	0.07	0	0.15	0.75	0.02	AXA94086.1;AXA94087.1;AXA94897.1;AXA94088.1	PF00534	PF13524;PF00534;PF13692;PF13439;PF13579;PF05050;PF14524;PF13604;PF00005;PF01061
CP030092.1	deepbgc	0.1.0	deepbgc	CP030092.1_5773300-5779647.1	5773300	5779647	6347	3	6	1	0.5496	antibacterial	0.64	0.14	0.11	0.14		0	0.03	0.15	0.19	0.36	0	0.26	AXA94092.1;AXA94093.1;AXA94094.1	PF08241	PF04773;PF13946;PF00353;PF08241;PF13649;PF10119
CP030092.1	deepbgc	0.1.0	deepbgc	CP030092.1_5800516-5846914.1	5800516	5846914	46398	16	42	5	0.8698		0.35	0.03	0.1	0.41	NRP	0.01	0.86	0.11	0.05	0	0	0	AXA94106.1;AXA94107.1;AXA94108.1;AXA94109.1;AXA94110.1;AXA94111.1;AXA94112.1;AXA94113.1;AXA94114.1;AXA94115.1;AXA94116.1;AXA94117.1;AXA94118.1;AXA94119.1;AXA94120.1;AXA94901.1	PF00561;PF00668;PF00501;PF00975;PF00155	PF07589;PF11019;PF05118;PF05721;PF00282;PF00266;PF00155;PF00005;PF13191;PF02463;PF00501;PF00550;PF00668;PF13193;PF04204;PF13483;PF00753;PF12706;PF00501;PF13193;PF00550;PF00668;PF00668;PF00501;PF13193;PF00296;PF00550;PF00975;PF12697;PF12146;PF07715;PF00593;PF14905;PF00561;PF12146;PF12697;PF12695;PF13621;PF08007;PF02373;PF10459;PF00949
CP030092.1	deepbgc	0.1.0	deepbgc	CP030092.1_6316513-6328392.1	6316513	6328392	11879	11	17	4	0.8573	antibacterial	0.5	0.09	0.06	0.39		0	0.29	0.46	0.15	0.08	0.02	0.01	AXA94473.1;AXA94931.1;AXA94474.1;AXA94475.1;AXA94476.1;AXA94477.1;AXA94478.1;AXA94479.1;AXA94480.1;AXA94481.1;AXA94482.1	PF02668;PF00975;PF00501;PF00561	PF06228;PF05171;PF09722;PF08808;PF03009;PF00593;PF07715;PF12261;PF00501;PF02668;PF01430;PF00132;PF14602;PF12146;PF00975;PF12697;PF00561

## Sheet: Up regulated BGC
Up regulation BGC in PDA medium (active) compared to YMA medium (inactive)
Feature ID	Fold change(PDA/YMA)	P-value	product_accession	name	Type	Cluster
DPH57_02630	63.2083	0.00467	AXA90162.1	hypothetical protein	Polyketide	1
DPH57_02635	1.43283	0.477941	AXA90163.1	SAM-dependent methyltransferase	Polyketide	1
maf	1.71031	0.744169	AXA90164.1	septum formation protein Maf	Polyketide	1
DPH57_02645	1.46527	0.478352	AXA90165.1	DUF177 domain-containing protein	Polyketide	1
DPH57_02650	1.04365	0.939856	AXA90166.1	50S ribosomal protein L32	Polyketide	1
DPH57_02655	-1.20075	0.734877	AXA90167.1	phosphate acyltransferase PlsX	Polyketide	1
DPH57_02660	1.18124	0.759031	AXA90168.1	3-oxoacyl-ACP synthase	Polyketide	1
fabD	-1.34909	0.545175	AXA90169.1	[acyl-carrier-protein] S-malonyltransferase	Polyketide	1
fabG	-1.13388	0.796333	AXA90170.1	3-oxoacyl-ACP reductase FabG	Polyketide	1
DPH57_02675	-2.01476	0.167593	AXA90171.1	acyl carrier protein	Polyketide	1
fabF	-1.22943	0.682992	AXA90172.1	beta-ketoacyl-[acyl-carrier-protein] synthase II	Polyketide	1
DPH57_06035	1.52565	0.368959	AXA90770.1	aminoacetone oxidase family FAD-binding enzyme	Terpene	2
DPH57_06040	1.17025	0.796915	AXA94583.1	DUF2807 domain-containing protein	Terpene	2
DPH57_06045	-1.15765	0.766528	AXA94584.1	hypothetical protein	Terpene	2
DPH57_06050	-1.20078	0.713203	AXA90771.1	phytoene dehydrogenase	Terpene	2
hpnD	1.22062	0.667163	AXA90772.1	squalene synthase HpnD	Terpene	2
DPH57_08205	2.7705	0.039856	AXA94630.1	dTDP-4-dehydrorhamnose reductase	NRPS	3
DPH57_08210	1.22142	0.705089	AXA91144.1	acyltransferase	NRPS	3
DPH57_08215	-1.0217	1	AXA91145.1	DUF72 domain-containing protein	NRPS	3
DPH57_08220	-52.6492	2.05e-08	AXA91146.1	enterobactin transporter EntS	NRPS	3
DPH57_08225	-92.0248	6.79e-10	AXA94631.1	non-ribosomal peptide synthetase	NRPS	3
DPH57_08230	-25.0005	1.25e-07	AXA91147.1	MbtH family protein	NRPS	3
DPH57_08235	-312.053	1.3e-11	AXA91148.1	enterochelin esterase	NRPS	3
DPH57_08240	-112.982	3.41e-10	AXA91149.1	PepSY domain-containing protein	NRPS	3
DPH57_08245	-125.887	3.04e-10	AXA91150.1	hypothetical protein	NRPS	3
DPH57_08250	-47.6214	2.3e-08	AXA91151.1	hypothetical protein	NRPS	3
DPH57_08255	-121.066	1.88e-10	AXA91152.1	hydrophobe/amphiphile efflux-1 family RND transporter	NRPS	3
DPH57_08260	-124.914	9.61e-11	AXA91153.1	efflux transporter periplasmic adaptor subunit	NRPS	3
DPH57_08265	-524.681	2.86e-12	AXA94632.1	2,3-dihydro-2,3-dihydroxybenzoate dehydrogenase	NRPS	3
DPH57_08270	-621.963	2.34e-12	AXA91154.1	isochorismatase	NRPS	3
DPH57_08275	-606.103	1.1e-11	AXA91155.1	(2,3-dihydroxybenzoyl)adenylate synthase	NRPS	3
DPH57_08280	-254.772	6.97e-12	AXA91156.1	isochorismate synthase	NRPS	3
DPH57_08285	-32.2293	3.42e-08	AXA91157.1	TonB-dependent receptor	NRPS	3
DPH57_08290	-1.68539	0.558613	AXA91158.1	hypothetical protein	NRPS	3
DPH57_08295	1.64578	0.368221	AXA91159.1	hemolysin	NRPS	3
DPH57_08300	1.58761	0.444782	AXA91160.1	pectate lyase	NRPS	3
DPH57_08305	1.16752	0.77789	AXA91161.1	voltage-gated chloride channel protein	NRPS	3
DPH57_08310	-3.2109	0.0196775	AXA94633.1	copper oxidase	NRPS	3
DPH57_09120	1.5096	0.504175	AXA91297.1	hypothetical protein	NRPS	4
DPH57_09125	-1.24792	0.697694	AXA91298.1	hypothetical protein	NRPS	4
DPH57_09130	1.13622	0.815739	AXA91299.1	hypothetical protein	NRPS	4
DPH57_09135	1.06663	0.93671	AXA91300.1	TauD/TfdA family dioxygenase	NRPS	4
DPH57_09140	1.44057	0.570383	AXA91301.1	non-ribosomal peptide synthetase	NRPS	4
DPH57_09145	1.19648	0.768631	AXA94654.1	hypothetical protein	NRPS	4
DPH57_09150	-1.02622	0.971537	AXA91302.1	non-ribosomal peptide synthetase	NRPS	4
DPH57_09155	-1.22665	0.687229	AXA91303.1	hypothetical protein	NRPS	4
DPH57_09165	6.51494	0.516486	AXA91305.1	hypothetical protein	NRPS	4
DPH57_09170	1.40171	0.46799	AXA91306.1	ABC transporter	NRPS	4
DPH57_09175	1.89484	0.196079	AXA91307.1	hypothetical protein	NRPS	4
DPH57_09180	1.95885	0.169679	AXA91308.1	hypothetical protein	NRPS	4
DPH57_09185	1.2914	0.61546	AXA91309.1	hypothetical protein	NRPS	4
DPH57_09190	1.40579	0.579612	AXA91310.1	hypothetical protein	NRPS	4
DPH57_09195	1.72816	0.300452	AXA91311.1	peptidase domain-containing ABC transporter	NRPS	4
DPH57_12145	-1.09785	0.867607	AXA91826.1	type II secretion system F family protein	Saccharide	5
DPH57_12155	-1.80444	0.338913	AXA91828.1	helix-turn-helix transcriptional regulator	Saccharide	5
DPH57_12160	-2.10197	0.147781	AXA91829.1	PEP-CTERM sorting domain-containing protein	Saccharide	5
DPH57_12165	-2.72534	0.0502478	AXA91830.1	endonuclease/exonuclease/phosphatase	Saccharide	5
DPH57_12170	-2.34864	0.2731	AXA91831.1	hypothetical protein	Saccharide	5
DPH57_12175	-1.72945	0.282819	AXA94697.1	TIGR03790 family protein	Saccharide	5
DPH57_12180	1.52008	0.776154	AXA91832.1	hypothetical protein	Saccharide	5
DPH57_12185	1.1214	1	AXA91833.1	PEP-CTERM sorting domain-containing protein	Saccharide	5
DPH57_12190	-1.03733	0.948412	AXA91834.1	mannose-1-phosphate guanylyltransferase/mannose-6-phosphate isomerase	Saccharide	5
DPH57_12195	-1.0829	0.889021	AXA91835.1	NDP-sugar synthase	Saccharide	5
galE	1.29512	0.652154	AXA91836.1	UDP-glucose 4-epimerase GalE	Saccharide	5
DPH57_12205	1.21309	0.72737	AXA91837.1	glycosyltransferase WbuB	Saccharide	5
DPH57_12210	-1.1126	0.846122	AXA91838.1	GDP-mannose dehydrogenase	Saccharide	5
DPH57_12215	1.13603	0.825308	AXA91839.1	heparinase	Saccharide	5
DPH57_12220	1.03757	0.942917	AXA91840.1	hypothetical protein	Saccharide	5
DPH57_12225	1.26531	0.62943	AXA91841.1	hypothetical protein	Saccharide	5
DPH57_12230	1.047	0.929527	AXA91842.1	hypothetical protein	Saccharide	5
DPH57_12235	-1.0903	0.928596	AXA91843.1	hypothetical protein	Saccharide	5
DPH57_12240	1.1484	1	AXA91844.1	DUF1800 domain-containing protein	Saccharide	5
DPH57_12245	1	1	AXA91845.1	ISL3 family transposase	Saccharide	5
DPH57_12250	-1.05867	0.921551	AXA91846.1	heparinase	Saccharide	5
DPH57_12255	1.32035	0.619688	AXA91847.1	glycosyltransferase family 2 protein	Saccharide	5
DPH57_12260	1.34257	0.595774	AXA91848.1	hypothetical protein	Saccharide	5
DPH57_12265	1.54835	0.403604	AXA91849.1	lipopolysaccharide biosynthesis protein	Saccharide	5
epsI	-1.00994	0.987912	AXA91850.1	EpsI family protein	Saccharide	5
xrtB	1.24769	0.669985	AXA94698.1	exosortase B	Saccharide	5
epsG	-1.06474	0.904412	AXA91851.1	chain length determinant protein tyrosine kinase EpsG	Saccharide	5
epsF	-1.08103	0.877479	AXA91852.1	chain length determinant protein EpsF	Saccharide	5
epsE	1.1456	0.786963	AXA91853.1	polysaccharide export protein EpsE	Saccharide	5
epsD	-1.22693	0.689785	AXA91854.1	peptidyl-prolyl cis-trans isomerase, EpsD family	Saccharide	5
DPH57_12300	1.34765	0.607492	AXA91855.1	undecaprenyl-phosphate glucose phosphotransferase	Saccharide	5
DPH57_12305	-1.03677	1	AXA91856.1	hypothetical protein	Saccharide	5
DPH57_12310	1	1	AXA91857.1	ISL3 family transposase	Saccharide	5
DPH57_12315	1.2162	0.711274	AXA91858.1	hypothetical protein	Saccharide	5
DPH57_12320	1.93243	0.205884	AXA91859.1	CAAX prenyl protease-related protein	Saccharide	5
DPH57_12795	5.72164	0.00926	AXA94705.1	calcium-binding protein	RiPP (ribosomal natural product)	6
DPH57_12800	4.47253	0.246474	AXA91944.1	type I secretion system permease/ATPase	RiPP (ribosomal natural product)	6
DPH57_12805	3.80694	0.212487	AXA91945.1	hemolysin secretion protein D	RiPP (ribosomal natural product)	6
DPH57_12810	-1.29779	0.669931	AXA91946.1	hypothetical protein	RiPP (ribosomal natural product)	6
DPH57_14660	-1.79578	0.583982	AXA92273.1	DNA gyrase inhibitor YacG	NRPS-Polyketide	7
DPH57_14665	1.4867	0.653201	AXA92274.1	phosphopantetheinyl transferase	NRPS-Polyketide	7
DPH57_14670	2.83382	0.101948	AXA92275.1	LuxR family transcriptional regulator	NRPS-Polyketide	7
DPH57_14675	1.69809	0.347629	AXA92276.1	acyl-CoA dehydrogenase	NRPS-Polyketide	7
DPH57_14680	2.19093	0.152706	AXA92277.1	hypothetical protein	NRPS-Polyketide	7
DPH57_14685	2.08671	0.244021	AXA92278.1	hypothetical protein	NRPS-Polyketide	7
DPH57_14690	2.78368	0.138324	AXA92279.1	hypothetical protein	NRPS-Polyketide	7
DPH57_14695	3.03281	0.114322	AXA92280.1	hypothetical protein	NRPS-Polyketide	7
DPH57_14700	2.38786	0.203334	AXA92281.1	hypothetical protein	NRPS-Polyketide	7
DPH57_14705	2.67838	0.171634	AXA92282.1	hypothetical protein	NRPS-Polyketide	7
DPH57_14710	1.7947	0.430501	AXA92283.1	hypothetical protein	NRPS-Polyketide	7
DPH57_14715	2.39174	0.221421	AXA92284.1	hypothetical protein	NRPS-Polyketide	7
DPH57_14720	2.25135	0.231706	AXA92285.1	MATE family efflux transporter	NRPS-Polyketide	7
DPH57_14725	2.21203	0.148682	AXA92286.1	hypothetical protein	NRPS-Polyketide	7
DPH57_14730	2.54668	0.19568	AXA92287.1	3-oxoacyl-ACP reductase FabG	NRPS-Polyketide	7
DPH57_14735	3.2496	0.0891952	AXA92288.1	hypothetical protein	NRPS-Polyketide	7
DPH57_14740	1.50034	0.566144	AXA92289.1	beta-ketoacyl-ACP synthase	NRPS-Polyketide	7
DPH57_14745	1.76601	0.392645	AXA92290.1	histidine ammonia-lyase	NRPS-Polyketide	7
DPH57_14750	5.56158	0.0209591	AXA92291.1	hypothetical protein	NRPS-Polyketide	7
DPH57_14755	2.80197	0.122461	AXA92292.1	hypothetical protein	NRPS-Polyketide	7
DPH57_14760	1.86965	0.27122	AXA92293.1	hypothetical protein	NRPS-Polyketide	7
DPH57_14765	1.59979	0.464357	AXA92294.1	hypothetical protein	NRPS-Polyketide	7
DPH57_14770	1.30731	0.598961	AXA92295.1	monooxygenase	NRPS-Polyketide	7
DPH57_14775	-1.13672	0.787033	AXA92296.1	8-oxo-dGTP diphosphatase MutT	NRPS-Polyketide	7
DPH57_18025	-1.22296	1	AXA92876.1	hypothetical protein	RiPP (ribosomal natural product)	8
DPH57_18030	1.88846	0.544148	AXA92877.1	hypothetical protein	RiPP (ribosomal natural product)	8
DPH57_18035	-1.80897	1	AXA92878.1	hypothetical protein	RiPP (ribosomal natural product)	8
DPH57_18040	1.74917	1	AXA92879.1	hypothetical protein	RiPP (ribosomal natural product)	8
DPH57_18045	2.44329	0.647777	AXA92880.1	zinc-binding alcohol dehydrogenase family protein	RiPP (ribosomal natural product)	8
DPH57_18050	2.28482	1	AXA92881.1	hypothetical protein	RiPP (ribosomal natural product)	8
DPH57_18055	4.88912	0.247103	AXA92882.1	hypothetical protein	RiPP (ribosomal natural product)	8
DPH57_18060	1.8193	1	AXA92883.1	hypothetical protein	RiPP (ribosomal natural product)	8
DPH57_18065	1.4311	0.506202	AXA92884.1	hypothetical protein	RiPP (ribosomal natural product)	8
DPH57_19080	1.1414	0.881062	AXA93057.1	exo-alpha-sialidase	Saccharide	9
DPH57_19085	2.33987	0.25126	AXA93058.1	MoaD/ThiS family protein	Saccharide	9
DPH57_19090	-1.43939	0.532017	AXA93059.1	hypothetical protein	Saccharide	9
DPH57_19095	1.67483	0.304592	AXA94799.1	(2Fe-2S)-binding protein	Saccharide	9
DPH57_19100	1.52381	0.395594	AXA93060.1	hypothetical protein	Saccharide	9
DPH57_19105	-1.05455	0.948551	AXA94800.1	polysaccharide deacetylase family protein	Saccharide	9
DPH57_19110	1.1675	0.87367	AXA93061.1	putative O-glycosylation ligase, exosortase A system-associated	Saccharide	9
DPH57_19115	1.45759	0.567787	AXA93062.1	phenylacetate--CoA ligase family protein	Saccharide	9
DPH57_19120	1.00774	1	AXA93063.1	glycosyltransferase family 1 protein	Saccharide	9
DPH57_19125	1.63998	0.379238	AXA94801.1	glycosyltransferase, exosortase A system-associated	Saccharide	9
DPH57_19130	1.31773	0.573982	AXA93064.1	asparagine synthetase B	Saccharide	9
DPH57_19135	1.32169	0.553443	AXA93065.1	TIGR03088 family PEP-CTERM/XrtA system glycosyltransferase	Saccharide	9
DPH57_19140	1.45496	0.458175	AXA93066.1	exosortase A	Saccharide	9
DPH57_19145	1.51383	0.428	AXA93067.1	TIGR03087 family PEP-CTERM/XrtA system glycosyltransferase	Saccharide	9
DPH57_19150	-1.05805	1	AXA93068.1	FemAB family PEP-CTERM system-associated protein	Saccharide	9
DPH57_19155	1.19803	0.798464	AXA93069.1	polysaccharide deacetylase family protein	Saccharide	9
DPH57_19160	-1.10177	0.868929	AXA93070.1	UDP-N-acetylglucosamine 2-epimerase (non-hydrolyzing)	Saccharide	9
DPH57_21990	-1.01049	0.989411	AXA93579.1	polyprenyl synthetase family protein	Terpene	10
DPH57_21995	-1.43304	0.494666	AXA93580.1	glycosyltransferase	Terpene	10
crtY	-1.59436	0.372819	AXA93581.1	lycopene cyclase	Terpene	10
DPH57_22005	-1.73559	0.28468	AXA94848.1	phytoene desaturase	Terpene	10
DPH57_22010	-1.51877	0.438714	AXA93582.1	phytoene/squalene synthase family protein	Terpene	10
DPH57_22015	-1.28619	0.637374	AXA93583.1	beta-carotene hydroxylase	Terpene	10
DPH57_22020	-1.75045	0.244923	AXA93584.1	DUF2141 domain-containing protein	Terpene	10
DPH57_22025	1.22971	0.67861	AXA93585.1	alpha/beta hydrolase	Terpene	10
DPH57_22030	1.6242	0.378695	AXA93586.1	hybrid sensor histidine kinase/response regulator	Terpene	10
DPH57_22035	5.6572	0.062202	AXA93587.1	IS481 family transposase	Terpene	10
DPH57_22040	1.16901	0.75869	AXA93588.1	hypothetical protein	Terpene	10
DPH57_22045	1.23206	0.684377	AXA93589.1	hypothetical protein	Terpene	10
DPH57_22050	1.4688	0.434893	AXA93590.1	hypothetical protein	Terpene	10
DPH57_22055	-1.26016	0.633905	AXA94849.1	hypothetical protein	Terpene	10
DPH57_23220	4.13391	0.0111796	AXA93797.1	fatty acid desaturase	Polyketide	11
DPH57_23225	3.66245	0.0149637	AXA93798.1	aromatic ring-hydroxylating dioxygenase subunit alpha	Polyketide	11
DPH57_23230	3.61907	0.0150268	AXA93799.1	hypothetical protein	Polyketide	11
DPH57_23235	4.48891	0.00427	AXA93800.1	AMP-dependent synthetase	Polyketide	11
DPH57_23240	4.34143	0.00558	AXA94869.1	acyl-CoA desaturase	Polyketide	11
DPH57_23245	4.77652	0.00304	AXA93801.1	acyl-CoA desaturase	Polyketide	11
DPH57_23250	3.99809	0.00846	AXA93802.1	polyketide synthase	Polyketide	11
DPH57_23255	3.34735	0.0140274	AXA93803.1	fatty acid desaturase	Polyketide	11
DPH57_23260	5.37932	0.00191	AXA93804.1	delta-12-desaturase	Polyketide	11
DPH57_23265	12.544	1.04e-05	AXA93805.1	rubredoxin	Polyketide	11
DPH57_23270	7.17011	0.000384	AXA93806.1	alpha/beta hydrolase	Polyketide	11
DPH57_23275	4.82987	0.00316	AXA93807.1	acetyl-CoA C-acyltransferase	Polyketide	11
DPH57_23280	1.25025	0.675759	AXA93808.1	enoyl-CoA hydratase/isomerase family protein	Polyketide	11
DPH57_23285	1.00025	1	AXA93809.1	hypothetical protein	Polyketide	11
DPH57_24890	1.39115	0.670015	AXA94086.1	glycosyl transferase family 1	Saccharide	12
DPH57_24895	1.22648	0.768541	AXA94087.1	hypothetical protein	Saccharide	12
DPH57_24900	1.788	0.343381	AXA94897.1	ABC transporter ATP-binding protein	Saccharide	12
DPH57_24905	-1.13571	1	AXA94088.1	ABC transporter permease	Saccharide	12
DPH57_25015	-4.57604	0.00514	AXA94106.1	PEP-CTERM sorting domain-containing protein	NRPS	13
DPH57_25020	1.18069	0.788406	AXA94107.1	hypothetical protein	NRPS	13
DPH57_25025	1.32613	0.79396	AXA94108.1	hypothetical protein	NRPS	13
DPH57_25030	1.4061	0.569523	AXA94109.1	ectoine hydroxylase family protein	NRPS	13
DPH57_25035	-1.47472	0.532265	AXA94110.1	aspartate aminotransferase family protein	NRPS	13
DPH57_25040	-1.6799	0.413044	AXA94111.1	cyclic peptide export ABC transporter	NRPS	13
DPH57_25045	-1.12653	0.882867	AXA94112.1	hypothetical protein	NRPS	13
DPH57_25050	-1.45021	1	AXA94113.1	hypothetical protein	NRPS	13
DPH57_25055	1.45157	1	AXA94114.1	MBL fold metallo-hydrolase	NRPS	13
DPH57_25060	1.3475	0.853995	AXA94115.1	hypothetical protein	NRPS	13
DPH57_25065	1.27487	1	AXA94116.1	hypothetical protein	NRPS	13
DPH57_25070	1.05339	1	AXA94117.1	TonB-dependent receptor	NRPS	13
DPH57_25075	-1.47258	0.622256	AXA94118.1	hypothetical protein	NRPS	13
DPH57_25080	-1.08772	0.91378	AXA94119.1	alpha/beta hydrolase	NRPS	13
DPH57_25085	1.34813	0.85264	AXA94120.1	hypothetical protein	NRPS	13
DPH57_25090	-1.11303	0.90769	AXA94901.1	S46 family peptidase	NRPS	13
Statistical criteria of up regulatied genes for p-value < 0.05 and |fold change (FC) > 2 were marked in red
Significant up regulated BGC (over 70% up regulated genes) were highlighted in yellow
