# Supplementary material for: Integrated Omics Approach to Unveil Antifungal Bacterial Polyynes as acetyl-CoA Acetyltransferase Inhibitors
Source: Research Square preprint supplement (doi:10.21203/rs.3.rs-1110265/v1), 2021-12-10
Supplement: Supplementary file 3 [file Supplementary Data 2_Multigeneblast result of massilin BGC query in BCT database.xlsx]

## Sheet: Genome accession
Whole-genome sequences used in mining bacterial polyyne gene clusters
Genus	Strains	Accessions
Amycolatopsis	Amycolatopsis orientalis strain B-37	CP016174
Burkholderia 1	Burkholderia gladioli BSR3	CP002599
Burkholderia 1	Burkholderia gladioli pv. gladioli strain FDAARGOS_188	CP022213
Burkholderia 1	Burkholderia gladioli pv. gladioli strain FDAARGOS_389	CP023522
Burkholderia 1	Burkholderia gladioli pv. gladioli strain KACC 11889	CP022005
Burkholderia 1	Burkholderia gladioli strain ATCC 10248	CP009323
Burkholderia 1	Burkholderia gladioli strain Co14	CP033430
Burkholderia 1	Burkholderia plantarii strain ATCC 43733	CP007213
Burkholderia 1	Burkholderia plantarii strain PG1	CP002581
Burkholderia 2	Burkholderia ambifaria IOP40-10	ABLC01000003
Burkholderia 2	Burkholderia ambifaria MEX-5	ABLK01000019
Burkholderia 2	Burkholderia ambifaria strain AU11161	PVFJ01000031
Burkholderia 2	Burkholderia ambifaria strain BCC0191	NZ_CADEQI010000002
Burkholderia 2	Burkholderia sp. Bp7605 strain MSMB0175	CP013448
Burkholderia 2	Burkholderia sp. KJ006	CP003515
Burkholderia 2	Burkholderia sp. LA-2-3-30-S1-D2	CP013383
Burkholderia 2	Burkholderia sp. MBR-1	CP053610
Burkholderia 2	Burkholderia stagnalis strain MSMB735WGS	CP013459
Burkholderia 2	Burkholderia ubonensis strain MSMB0783	CP013422
Burkholderia 2	Burkholderia vietnamiensis G4	CP000615
Burkholderia 2	Burkholderia vietnamiensis LMG 10929	CP009630
Burkholderia 2	Burkholderia vietnamiensis strain AU1233	CP013433
Burkholderia 2	Burkholderia vietnamiensis strain FDAARGOS_239	CP020396
Burkholderia 2	Burkholderia vietnamiensis strain FL-2-3-30-S1-D0	CP013394
Burkholderia 2	Burkholderia vietnamiensis strain HI2297	CP013440
Burkholderia 2	Burkholderia vietnamiensis strain MSMB608WGS	CP013455
Collimonas	Collimonas fungivorans strain Ter6	CP013232
Collimonas	Collimonas fungivorans Ter331	CP002745
Gynuella	Gynuella sunshinyii YC6258	CP007142
Massilia	Massilia armeniaca strain ZMN-3	CP028324
Massilia	Massilia sp. YMA4	CP030092
Mycobacterium	Mycobacterium cookii JCM 12404	AP022569
Mycobacterium	Mycobacterium rhodesiae NBB3	CP003169
Nocardia	Nocardia brasiliensis strain AUSMDU00024985	CP046171
Pseudomonas	Pseudomonas protegens Cab57	AP014522
Pseudomonas	Pseudomonas protegens CHA0	CP003190
Pseudomonas	Pseudomonas protegens Pf-5	CP000076
Pseudomonas	Pseudomonas protegens strain FD6	CP031396
Pseudomonas	Pseudomonas protegens strain FDAARGOS_307	CP022097
Pseudomonas	Pseudomonas protegens strain H78	CP013184
Pseudomonas	Pseudomonas protegens strain pf5	CP032358
Pseudomonas	Pseudomonas protegens strain pf5-k2	CP032353
Pseudomonas	Pseudomonas protegens strain pf5-k3	CP032352
Pseudomonas	Pseudomonas protegens strain UCT	CP017964
Pseudomonas	Pseudomonas sp. CMR5c	CP027705
Streptomyces	Streptomyces albireticuli strain MDJK11	CP021744
Streptomyces	Streptomyces griseofuscus strain DSM 40191	CP051006
Streptomyces	Streptomyces rochei 7434AN4	AP018517
Streptomyces	Streptomyces sp. ADI95-16	CP033582
Streptomyces	Streptomyces sp. HF10	CP047144
Streptomyces	Streptomyces sp. Mg1	CP011665
Streptomyces	Streptomyces sp. NA04227	CP054918
Streptomyces	Streptomyces sp. Tu 2975	CP047140
Trinickia	Paraburkholderia caryophylli strain Ballard 720	FXAH01000012
Trinickia	Trinickia caryophylli strain Ballard 720	PNXZ01000011
Trinickia	Trinickia caryophylli strain DSM 50341	VJZF01000001

## Sheet: MultiGenBlast result
Significant hits:
1. CP030092	Massilia sp. YMA4 chromosome, complete genome.
2. CP028324	Massilia armeniaca strain ZMN-3 chromosome, complete genome.
3. CP013433	Burkholderia vietnamiensis strain AU1233 chromosome 1, complete sequence.
4. CP013383	Burkholderia sp. LA-2-3-30-S1-D2 chromosome 2, complete sequence.
5. CP053610	Burkholderia sp. MBR-1 chromosome 2, complete sequence.
6. CP013440	Burkholderia vietnamiensis strain HI2297 chromosome 2, complete sequence.
7. CP013422	Burkholderia ubonensis strain MSMB0783 chromosome 2, complete sequence.
8. CP020396	Burkholderia vietnamiensis strain FDAARGOS_239 chromosome 2, complete sequence.
9. CP009630	Burkholderia vietnamiensis LMG 10929 chromosome II, complete sequence.
10. CP000615	Burkholderia vietnamiensis G4 chromosome 2, complete sequence.
11. CP013455	Burkholderia vietnamiensis strain MSMB608WGS chromosome 2, complete sequence.
12. CP013394	Burkholderia vietnamiensis strain FL-2-3-30-S1-D0 chromosome 2, complete sequence.
13. CP003515	Burkholderia sp. KJ006 chromosome 2, complete sequence.
14. CP002745	Collimonas fungivorans Ter331 chromosome, complete genome.
15. CP047140	Streptomyces sp. Tu 2975 chromosome, complete genome.
16. CP013232	Collimonas fungivorans strain Ter6 chromosome, complete genome.
17. CP051006	Streptomyces griseofuscus strain DSM 40191 chromosome, complete genome.
18. CP013448	Burkholderia sp. Bp7605 strain MSMB0175 chromosome 1, complete sequence.
19. CP013459	Burkholderia stagnalis strain MSMB735WGS chromosome 1, complete sequence.
20. AP014522	Pseudomonas protegens Cab57 DNA, complete genome.
21. CP031396	Pseudomonas protegens strain FD6 chromosome, complete genome.
22. CP007142	Gynuella sunshinyii YC6258, complete genome.
23. CP023522	Burkholderia gladioli pv. gladioli strain FDAARGOS_389 chromosome 1, complete sequence.
24. CP033430	Burkholderia gladioli strain Co14 chromosome 1, complete sequence.
25. CP009323	Burkholderia gladioli strain ATCC 10248 chromosome 1, complete sequence.
26. CP022213	Burkholderia gladioli pv. gladioli strain FDAARGOS_188 chromosome 1, complete sequence.
27. CP022005	Burkholderia gladioli pv. gladioli strain KACC 11889 chromosome 1, complete sequence.
28. CP002599	Burkholderia gladioli BSR3 chromosome 1, complete sequence.
29. CP021744	Streptomyces albireticuli strain MDJK11 chromosome, complete genome.
30. CP054918	Streptomyces sp. NA04227 chromosome, complete genome.
31. CP033582	Streptomyces sp. ADI95-16 plasmid pADI95-16a, complete sequence.
32. CP011665	Streptomyces sp. Mg1 plasmid pSMg1-1, complete sequence.
33. CP047144	Streptomyces sp. HF10 chromosome, complete genome.
34. AP018517	Streptomyces rochei 7434AN4 DNA, complete genome.
35. CP007213	Burkholderia plantarii strain ATCC 43733 chromosome 2, complete sequence.
36. CP002581	Burkholderia plantarii strain PG1 chromosome 2, complete sequence.
37. CP027705	Pseudomonas sp. CMR5c chromosome, complete genome.
38. CP032358	Pseudomonas protegens strain pf5 chromosome, complete genome.
39. CP032353	Pseudomonas protegens strain pf5-k2 chromosome, complete genome.
40. CP022097	Pseudomonas protegens strain FDAARGOS_307 chromosome, complete genome.
41. CP013184	Pseudomonas protegens strain H78, complete genome.
42. CP003190	Pseudomonas protegens CHA0, complete genome.
43. CP000076	Pseudomonas protegens Pf-5, complete genome.
44. CP017964	Pseudomonas protegens strain UCT genome.
45. AP022569	Mycobacterium cookii JCM 12404 DNA, complete genome.
46. CP032352	Pseudomonas protegens strain pf5-k3 chromosome, complete genome.
47. CP003169	Mycobacterium rhodesiae NBB3, complete genome.
48. CP046171	Nocardia brasiliensis strain AUSMDU00024985 chromosome, complete genome.
49. CP016174	Amycolatopsis orientalis strain B-37, complete genome.
50. NZ_CADEQI010000002	Burkholderia ambifaria strain BCC0191, whole genome shotgun sequence.
51. ABLC01000003	Burkholderia ambifaria IOP40-10 ctg00022, whole genome shotgun sequence.
52. PVFJ01000031	Burkholderia ambifaria strain AU11161 AU11161_NODE_4.ctg_1, whole genome shotgun sequence.
53. ABLK01000019	Burkholderia ambifaria MEX-5 ctg00754, whole genome shotgun sequence.
54. FXAH01000012	Paraburkholderia caryophylli strain Ballard 720 genome assembly, contig: Ga0139045_112, whole genome shotgun sequence.
55. VJZF01000001	Trinickia caryophylli strain DSM 50341 000000F_arrow, whole genome shotgun sequence.
56. PNXZ01000011	Trinickia caryophylli strain Ballard 720 NODE_11_length_204340_cov_20.893_ID_2499, whole genome shotgun sequence.
Details:
>>
1. CP030092
Source: Massilia sp. YMA4 chromosome, complete genome.
Number of proteins with BLAST hits to this cluster: 19
MultiGeneBlast score: 19.0
Cumulative Blast bit score: 9749
Table of genes, locations, strands and annotations of subject cluster:
AXA93779	5368498	5368758	+	hypothetical_protein	DPH57_23125
AXA93780	5368819	5369487	-	hypothetical_protein	DPH57_23130
AXA93781	5369506	5370984	-	hypothetical_protein	DPH57_23135
AXA93782	5370971	5371726	-	ABC_transporter_ATP-binding_protein	DPH57_23140
AXA93783	5371748	5373034	-	multidrug_ABC_transporter_substrate-binding protein	DPH57_23145
AXA93784	5372970	5373674	-	macrolide_ABC_transporter_ATP-binding_protein	DPH57_23150
AXA93785	5373668	5374888	-	hypothetical_protein	DPH57_23155
AXA93786	5374903	5375640	-	hypothetical_protein	DPH57_23160
AXA93787	5375438	5377786	-	peptidase_domain-containing_ABC_transporter	DPH57_23165
AXA93788	5377783	5378385	-	hypothetical_protein	DPH57_23170
AXA93789	5378482	5378667	-	hypothetical_protein	DPH57_23175
AXA93790	5379168	5381147	-	potassium_transporter	DPH57_23180
AXA93791	5381259	5382257	+	KpsF/GutQ_family_sugar-phosphate_isomerase	DPH57_23185
AXA94868	5382275	5382796	+	phenylphosphate_carboxylase_subunit_delta	DPH57_23190
AXA93792	5382809	5383411	+	LPS_export_ABC_transporter_periplasmic_protein LptC	lptC
AXA93793	5383421	5383981	+	lipopolysaccharide_transport_periplasmic_protein LptA	lptA
AXA93794	5383984	5384760	+	LPS_export_ABC_transporter_ATP-binding_protein	lptB
AXA93795	5384767	5386227	+	RNA_polymerase_factor_sigma-54	DPH57_23210
AXA93796	5386312	5386662	+	ribosome-associated_translation_inhibitor_RaiA	raiA
AXA93797	5387864	5388943	+	fatty_acid_desaturase	DPH57_23220
AXA93798	5389024	5390028	+	aromatic_ring-hydroxylating_dioxygenase_subunit alpha	DPH57_23225
AXA93799	5390060	5390881	+	hypothetical_protein	DPH57_23230
AXA93800	5391051	5392904	+	AMP-dependent_synthetase	DPH57_23235
AXA94869	5392954	5393856	+	acyl-CoA_desaturase	DPH57_23240
AXA93801	5393876	5394856	+	acyl-CoA_desaturase	DPH57_23245
AXA93802	5394915	5395244	+	polyketide_synthase	DPH57_23250
AXA93803	5395259	5396359	+	fatty_acid_desaturase	DPH57_23255
AXA93804	5396398	5397342	+	delta-12-desaturase	DPH57_23260
AXA93805	5397335	5397520	+	rubredoxin	DPH57_23265
AXA93806	5397583	5398500	+	alpha/beta_hydrolase	DPH57_23270
AXA93807	5398547	5399728	+	acetyl-CoA_C-acyltransferase	DPH57_23275
AXA93808	5399895	5400977	+	enoyl-CoA_hydratase/isomerase_family_protein	DPH57_23280
AXA93809	5400991	5402034	+	hypothetical_protein	DPH57_23285
AXA93810	5402069	5402932	-	RNase_adapter_RapZ	DPH57_23290
AXA93811	5402990	5404267	-	sodium:proton_antiporter	DPH57_23295
AXA93812	5404540	5405709	+	acyl-CoA_desaturase	DPH57_23300
AXA93813	5405739	5406674	-	HPr_kinase/phosphorylase	DPH57_23305
AXA93814	5406708	5407190	-	PTS_sugar_transporter_subunit_IIA	DPH57_23310
AXA93815	5407510	5408343	-	NADPH-dependent_7-cyano-7-deazaguanine_reductase QueF	DPH57_23315
AXA93816	5408490	5410022	-	threonine_ammonia-lyase,_biosynthetic	ilvA
AXA93817	5410252	5410746	+	DedA_family_protein	DPH57_23325
AXA93818	5410973	5414986	+	FAD-linked_oxidase	DPH57_23330
AXA93819	5414983	5415414	+	HIT_family_protein	DPH57_23335
AXA93820	5415423	5415842	+	1-(5-phosphoribosyl)-5-((5-	DPH57_23340
AXA93821	5415961	5416884	-	aliphatic_sulfonate_ABC_transporter substrate-binding protein	DPH57_23345
AXA93822	5416902	5417939	-	LacI_family_transcriptional_regulator	DPH57_23350
AXA93823	5418106	5420337	+	TonB-dependent_receptor	DPH57_23355
AXA93824	5420337	5421605	+	nitrilotriacetate_monooxygenase	DPH57_23360
AXA93825	5421656	5421844	-	hypothetical_protein	DPH57_23365
Table of Blast hits (query gene, subject gene, %identity, blast score, %coverage, e-value):
AXA93797.1	AXA93797	100	742	100	0
AXA93798.1	AXA93798	100	699	100	0
AXA93799.1	AXA93799	100	554	100	1e-157
AXA93800.1	AXA93800	100	1254	100	0
AXA94869.1	AXA94869	100	608	100	1e-173
AXA94869.1	AXA93801	41	237	93.3333	3e-62
AXA93801.1	AXA93801	100	666	100	0
AXA93801.1	AXA94869	41	237	85.8896	4e-62
AXA93802.1	AXA93802	100	219	100	2e-57
AXA93803.1	AXA93803	100	756	100	0
AXA93804.1	AXA93804	100	627	100	2e-179
AXA93804.1	AXA93806	31	107	93.949	4e-23
AXA93805.1	AXA93805	100	127	100	1e-29
AXA93806.1	AXA93806	100	600	100	2e-171
AXA93806.1	AXA93804	32	102	88.5246	2e-21
AXA93807.1	AXA93807	100	788	100	0
AXA93808.1	AXA93808	100	727	100	0
AXA93809.1	AXA93809	100	699	100	0
>>
2. CP028324
Source: Massilia armeniaca strain ZMN-3 chromosome, complete genome.
Number of proteins with BLAST hits to this cluster: 19
MultiGeneBlast score: 19.0
Cumulative Blast bit score: 9264
Table of genes, locations, strands and annotations of subject cluster:
AVR98669	5928142	5930373	-	TonB-dependent_receptor	C9I28_25815
AVR98670	5930540	5931577	+	LacI_family_transcriptional_regulator	C9I28_25820
AVR98671	5931593	5932516	+	aliphatic_sulfonate_ABC_transporter substrate-binding protein	C9I28_25825
AVR98672	5932607	5933026	-	1-(5-phosphoribosyl)-5-((5-	C9I28_25830
AVR98673	5933035	5933466	-	HIT_family_protein	C9I28_25835
C9I28_25840	5933463	5937475	-	FAD-linked_oxidase	no_locus_tag
AVR98674	5937702	5938196	-	hypothetical_protein	C9I28_25845
ilvA	5938425	5939956	+	threonine_ammonia-lyase,_biosynthetic	no_locus_tag
AVR98675	5940125	5940958	+	NADPH-dependent_7-cyano-7-deazaguanine_reductase QueF	C9I28_25855
AVR98676	5941278	5941760	+	PTS_sugar_transporter_subunit_IIA	C9I28_25860
AVR98677	5941794	5942729	+	HPr_kinase/phosphorylase	C9I28_25865
AVR98678	5943588	5944757	-	acyl-CoA_desaturase	C9I28_25870
AVR98679	5945030	5946307	+	sodium:proton_antiporter	C9I28_25875
AVR98680	5946356	5947219	+	RNase_adapter_RapZ	C9I28_25880
AVR98681	5947254	5948297	-	hypothetical_protein	C9I28_25885
AVR98682	5948311	5949393	-	3-hydroxyisobutyryl-CoA_hydrolase	C9I28_25890
AVR98683	5949557	5950738	-	acetyl-CoA_C-acyltransferase	C9I28_25895
AVR98684	5950784	5951713	-	lysophospholipase	C9I28_25900
AVR98685	5951776	5951961	-	rubredoxin	C9I28_25905
AVR98686	5951954	5952898	-	delta-12-desaturase	C9I28_25910
AVR98687	5952954	5954054	-	fatty_acid_desaturase	C9I28_25915
AVR98688	5954069	5954401	-	polyketide_synthase	C9I28_25920
AVR98689	5954454	5955428	-	acyl-CoA_desaturase	C9I28_25925
AVR98690	5955448	5956395	-	acyl-CoA_desaturase	C9I28_25930
AVR98691	5956400	5958253	-	AMP-dependent_synthetase	C9I28_25935
AVR98692	5958487	5959308	-	hypothetical_protein	C9I28_25940
AVR98693	5959340	5960344	-	(2Fe-2S)-binding_protein	C9I28_25945
AVR98694	5960425	5961504	-	fatty_acid_desaturase	C9I28_25950
AVR98695	5962884	5963234	-	ribosome-associated_translation_inhibitor_RaiA	raiA
AVR98696	5963319	5964788	-	RNA_polymerase_factor_sigma-54	C9I28_25960
AVR99397	5964794	5965555	-	LPS_export_ABC_transporter_ATP-binding_protein	lptB
AVR98697	5965572	5966132	-	lipopolysaccharide_transport_periplasmic_protein LptA	lptA
AVR98698	5966142	5966744	-	LPS_export_ABC_transporter_periplasmic_protein LptC	lptC
AVR98699	5966757	5967296	-	phenylphosphate_carboxylase_subunit_delta	C9I28_25980
AVR98700	5967296	5968294	-	KpsF/GutQ_family_sugar-phosphate_isomerase	C9I28_25985
AVR98701	5968406	5970385	+	potassium_transporter	C9I28_25990
AVR99398	5970385	5970714	+	YnfA_family_protein	C9I28_25995
AVR98702	5970853	5971956	+	catalase	C9I28_26000
AVR98703	5971974	5972579	+	hypothetical_protein	C9I28_26005
AVR98704	5972566	5973936	+	peroxidase	C9I28_26010
AVR98705	5974020	5974679	-	hypothetical_protein	C9I28_26015
AVR98706	5974813	5975496	-	hypothetical_protein	C9I28_26020
AVR98707	5975505	5976659	-	diguanylate_cyclase	C9I28_26025
AVR98708	5976670	5977521	-	MOSC_domain-containing_protein	C9I28_26030
AVR98709	5977652	5979199	-	hypothetical_protein	C9I28_26035
AVR99399	5979355	5979825	+	hypothetical_protein	C9I28_26040
AVR98710	5979826	5981049	+	glycosyl_transferase_family_1	C9I28_26045
AVR98711	5981137	5982228	-	redox-regulated_ATPase_YchF	C9I28_26050
Table of Blast hits (query gene, subject gene, %identity, blast score, %coverage, e-value):
AXA93797.1	AVR98694	98	736	100	0
AXA93798.1	AVR98693	97	685	100	0
AXA93799.1	AVR98692	93	527	100	2e-149
AXA93800.1	AVR98691	97	1192	96.9206	0
AXA94869.1	AVR98690	98	604	100	2e-172
AXA94869.1	AVR98689	41	233	93.3333	6e-61
AXA93801.1	AVR98689	98	649	98.773	0
AXA93801.1	AVR98690	41	235	85.8896	2e-61
AXA93802.1	AVR98688	99	215	100.917	4e-56
AXA93803.1	AVR98687	98	746	100	0
AXA93804.1	AVR98686	94	587	100	2e-167
AXA93804.1	AVR98684	33	105	86.6242	2e-22
AXA93805.1	AVR98685	98	125	100	4e-29
AXA93806.1	AVR98684	88	516	101.311	4e-146
AXA93806.1	AVR98686	31	102	96.7213	3e-21
AXA93807.1	AVR98683	95	734	100	0
AXA93808.1	AVR98682	96	668	100	0
AXA93809.1	AVR98681	91	605	100	8e-173
>>
3. CP013433
Source: Burkholderia vietnamiensis strain AU1233 chromosome 1, complete sequence.
Number of proteins with BLAST hits to this cluster: 15
MultiGeneBlast score: 15.5
Cumulative Blast bit score: 4856
Table of genes, locations, strands and annotations of subject cluster:
AOJ97971	1020454	1020918	+	hypothetical_protein	WK23_04525
AOJ97972	1020989	1021225	+	hypothetical_protein	WK23_04530
AOJ97973	1021335	1022963	-	aldehyde_dehydrogenase	WK23_04535
AOJ97974	1023424	1024368	-	LysR_family_transcriptional_regulator	WK23_04540
AOJ97975	1024589	1025623	+	calmodulin-binding_protein	WK23_04545
AOK01656	1025850	1026047	-	hypothetical_protein	WK23_04550
AOJ97976	1026101	1026451	-	transporter	WK23_04555
AOJ97977	1027059	1028579	+	helix-turn-helix_transcriptional_regulator	WK23_04560
AOJ97978	1028733	1028936	+	general_stress_protein_CsbD	WK23_04565
AOJ97979	1029247	1030398	+	branched_chain_amino_acid_ABC_transporter substrate-binding protein	WK23_04570
AOJ97980	1030543	1031715	+	FAD-dependent_oxidoreductase	WK23_04575
AOJ97981	1031845	1032417	-	LuxR_family_transcriptional_regulator	WK23_04580
AOJ97982	1032506	1033852	-	MFS_transporter	WK23_04585
AOJ97983	1034047	1034760	-	LuxR_family_transcriptional_regulator	WK23_04590
AOJ97984	1035188	1035571	+	hypothetical_protein	WK23_04595
AOJ97985	1035966	1036625	+	N-acylhomoserine_lactone_synthase	WK23_04600
AOJ97986	1036781	1038073	+	3-oxoacyl-ACP_synthase	WK23_04605
AOJ97987	1038246	1039631	+	FAD-binding_monooxygenase	WK23_04610
AOJ97988	1039740	1040822	+	fatty_acid_desaturase	WK23_04615
AOJ97989	1040903	1041907	+	(2Fe-2S)-binding_protein	WK23_04620
AOJ97990	1041904	1042821	+	hypothetical_protein	WK23_04625
AOJ97991	1042826	1044244	+	MFS_transporter	WK23_04630
AOK01657	1044326	1046122	+	AMP-dependent_synthetase	WK23_04635
AOJ97992	1046183	1047142	+	fatty_acid_desaturase	WK23_04640
AOJ97993	1047168	1048151	+	fatty_acid_desaturase	WK23_04645
AOJ97994	1048207	1048527	+	polyketide_synthase	WK23_04650
AOJ97995	1048541	1049638	+	fatty_acid_desaturase	WK23_04655
AOJ97996	1049638	1050561	+	delta-12-desaturase	WK23_04660
AOJ97997	1050558	1050743	+	rubredoxin	WK23_04665
AOJ97998	1050913	1052097	+	acetyl-CoA_acetyltransferase	WK23_04670
AOJ97999	1052158	1052346	+	hypothetical_protein	WK23_04675
AOJ98000	1052718	1053917	+	2-aminoadipate_aminotransferase	WK23_04680
AOJ98001	1053928	1054113	+	molecular_chaperone	WK23_04685
AOJ98002	1054204	1054800	+	pyridoxamine_5'-phosphate_oxidase	WK23_04690
AOJ98003	1054981	1056258	+	multidrug_MFS_transporter	WK23_04695
AOJ98004	1056505	1057548	+	alpha/beta_hydrolase	WK23_04700
AOJ98005	1057545	1058072	+	cytochrome_C_oxidase_subunit_III	WK23_04705
AOK01658	1058348	1058707	+	hypothetical_protein	WK23_04710
AOK01659	1058789	1059580	+	hypothetical_protein	WK23_04715
AOJ98006	1059624	1060238	-	lysine_transporter_LysE	WK23_04720
AOJ98007	1060447	1061595	+	porin	WK23_04725
AOJ98008	1061746	1062765	-	NADPH:quinone_oxidoreductase	WK23_04730
AOJ98009	1062892	1063845	+	LysR_family_transcriptional_regulator	WK23_04735
AOJ98010	1064009	1064941	-	LysR_family_transcriptional_regulator	WK23_04740
AOJ98011	1065147	1065920	+	hypothetical_protein	WK23_04745
AOJ98012	1065991	1067298	+	MFS_transporter	WK23_04750
AOJ98013	1067416	1071060	+	5-oxoprolinase	WK23_04755
AOJ98014	1071732	1073735	+	RNase_II_stability_modulator	WK23_04760
Table of Blast hits (query gene, subject gene, %identity, blast score, %coverage, e-value):
AXA93797.1	AOJ97988	71	536	100.279	4e-152
AXA93798.1	AOJ97989	84	603	100	5e-172
AXA93799.1	AOJ97990	68	360	94.1392	3e-99
AXA93800.1	AOK01657	53	585	94.4895	2e-166
AXA94869.1	AOJ97992	58	337	98.6667	4e-92
AXA94869.1	AOJ97993	41	223	93	6e-58
AXA93801.1	AOJ97993	73	477	92.3313	2e-134
AXA93801.1	AOJ97992	40	193	87.4233	7e-49
AXA93802.1	AOJ97994	64	129	100	3e-30
AXA93803.1	AOJ97995	70	510	96.7213	4e-144
AXA93804.1	AOJ97996	48	259	94.9045	9e-69
AXA93805.1	AOJ97997	70	98	100	5e-21
AXA93806.1	AOJ97996	31	99	97.7049	2e-20
AXA93807.1	AOJ97998	60	447	99.2366	3e-125
>>
4. CP013383
Source: Burkholderia sp. LA-2-3-30-S1-D2 chromosome 2, complete sequence.
Number of proteins with BLAST hits to this cluster: 14
MultiGeneBlast score: 14.0
Cumulative Blast bit score: 4809
Table of genes, locations, strands and annotations of subject cluster:
AOI96012	2375101	2375715	+	lysine_transporter_LysE	WS66_10435
AOI96013	2375927	2377330	-	amidase	WS66_10440
AOI96499	2377403	2378194	-	hypothetical_protein	WS66_10445
AOI96014	2378277	2378633	-	hypothetical_protein	WS66_10450
AOI96015	2378913	2379449	-	cytochrome_C_oxidase_subunit_III	WS66_10455
AOI96016	2379449	2380492	-	alpha/beta_hydrolase	WS66_10460
AOI96017	2380750	2382129	-	hypothetical_protein	WS66_10465
AOI96018	2382129	2382626	-	hypothetical_protein	WS66_10470
AOI96019	2382700	2383986	-	3-hydroxy-3-methylglutaryl-CoA_reductase	WS66_10475
AOI96020	2384148	2385539	+	GntR_family_transcriptional_regulator	WS66_10480
AOI96021	2385588	2386865	-	multidrug_MFS_transporter	WS66_10485
AOI96022	2387038	2387640	-	pyridoxamine_5'-phosphate_oxidase	WS66_10490
AOI96500	2387727	2387915	-	molecular_chaperone	WS66_10495
AOI96023	2387929	2389128	-	2-aminoadipate_aminotransferase	WS66_10500
AOI96024	2390293	2392317	+	hypothetical_protein	WS66_10505
AOI96025	2392421	2393929	+	FAD-dependent_oxidoreductase	WS66_10510
AOI96026	2393926	2394378	+	polysaccharide_synthesis_protein_GtrA	WS66_10515
AOI96027	2394639	2394827	-	hypothetical_protein	WS66_10520
AOI96028	2394889	2396073	-	acetyl-CoA_acetyltransferase	WS66_10525
AOI96029	2396237	2396422	-	rubredoxin	WS66_10530
AOI96030	2396419	2397342	-	delta-12-desaturase	WS66_10535
AOI96031	2397342	2398439	-	fatty_acid_desaturase	WS66_10540
AOI96032	2398453	2398773	-	polyketide_synthase	WS66_10545
AOI96033	2398829	2399812	-	fatty_acid_desaturase	WS66_10550
AOI96034	2399837	2400796	-	fatty_acid_desaturase	WS66_10555
AOI96501	2400857	2402644	-	AMP-dependent_synthetase	WS66_10560
AOI96035	2402721	2404139	-	MFS_transporter	WS66_10565
AOI96036	2404144	2405043	-	hypothetical_protein	WS66_10570
AOI96037	2405040	2406044	-	(2Fe-2S)-binding_protein	WS66_10575
AOI96038	2406123	2407205	-	fatty_acid_desaturase	WS66_10580
AOI96039	2407314	2408699	-	FAD-binding_monooxygenase	WS66_10585
AOI96040	2408853	2410118	-	3-oxoacyl-ACP_synthase	WS66_10590
AOI96041	2410304	2410957	-	N-acylhomoserine_lactone_synthase	WS66_10595
AOI96042	2411353	2411736	-	hypothetical_protein	WS66_10600
AOI96043	2412218	2412931	+	LuxR_family_transcriptional_regulator	WS66_10605
AOI96044	2413158	2414504	+	MFS_transporter	WS66_10610
AOI96045	2414561	2415532	+	peptidase_M19	WS66_10615
AOI96046	2415558	2416130	+	4-vinyl_reductase	WS66_10620
AOI96047	2416166	2416738	+	LuxR_family_transcriptional_regulator	WS66_10625
AOI96502	2416863	2418035	-	FAD-dependent_oxidoreductase	WS66_10630
AOI96048	2418225	2419376	-	branched_chain_amino_acid_ABC_transporter substrate-binding protein	WS66_10635
AOI96049	2419806	2419997	-	general_stress_protein_CsbD	WS66_10640
AOI96503	2420154	2421746	-	helix-turn-helix_transcriptional_regulator	WS66_10645
AOI96050	2422354	2422701	+	transporter	WS66_10650
AOI96051	2422754	2422951	+	hypothetical_protein	WS66_10655
AOI96052	2423176	2424204	-	calmodulin-binding_protein	WS66_10660
AOI96053	2424432	2425382	+	LysR_family_transcriptional_regulator	WS66_10665
AOI96054	2425874	2427502	+	aldehyde_dehydrogenase	WS66_10670
Table of Blast hits (query gene, subject gene, %identity, blast score, %coverage, e-value):
AXA93797.1	AOI96038	71	543	100.279	5e-154
AXA93798.1	AOI96037	82	593	100	5e-169
AXA93799.1	AOI96036	66	363	97.8022	4e-100
AXA93800.1	AOI96501	53	583	94.0032	7e-166
AXA94869.1	AOI96034	58	348	100.667	2e-95
AXA94869.1	AOI96033	40	231	99.3333	2e-60
AXA93801.1	AOI96033	74	482	92.3313	7e-136
AXA93801.1	AOI96034	39	198	87.4233	3e-50
AXA93802.1	AOI96032	66	132	100	4e-31
AXA93803.1	AOI96031	70	518	96.9945	1e-146
AXA93804.1	AOI96030	50	262	89.4904	1e-69
AXA93805.1	AOI96029	68	95	100	4e-20
AXA93807.1	AOI96028	60	461	99.2366	2e-129
>>
5. CP053610
Source: Burkholderia sp. MBR-1 chromosome 2, complete sequence.
Number of proteins with BLAST hits to this cluster: 14
MultiGeneBlast score: 14.0
Cumulative Blast bit score: 4753
Table of genes, locations, strands and annotations of subject cluster:
QMI46815	1	1386	+	NAD(P)/FAD-dependent_oxidoreductase	MBR110_15025
QMI46816	1495	2577	+	fatty_acid_desaturase	MBR110_15030
QMI46817	2658	3662	+	aromatic_ring-hydroxylating_dioxygenase_subunit alpha	MBR110_15035
QMI46818	3659	4576	+	hypothetical_protein	MBR110_15040
QMI46819	4581	5999	+	MFS_transporter	MBR110_15045
QMI48566	6081	7877	+	fatty_acyl-AMP_ligase	MBR110_15050
QMI46820	7938	8897	+	acyl-CoA_desaturase	MBR110_15055
QMI46821	8923	9906	+	acyl-CoA_desaturase	MBR110_15060
QMI46822	9962	10282	+	acyl_carrier_protein	MBR110_15065
QMI46823	10296	11393	+	fatty_acid_desaturase	MBR110_15070
QMI46824	11393	12316	+	alpha/beta_fold_hydrolase	MBR110_15075
QMI46825	12313	12498	+	rubredoxin	MBR110_15080
QMI46826	12668	13852	+	thiolase_family_protein	MBR110_15085
QMI46827	13913	14101	+	hypothetical_protein	MBR110_15090
QMI46828	14473	15672	+	PLP-dependent_aminotransferase_family_protein	MBR110_15095
QMI46829	15683	15868	+	hypothetical_protein	MBR110_15100
QMI46830	15959	16555	+	pyridoxamine_5'-phosphate_oxidase	MBR110_15105
QMI46831	16747	18024	+	alpha/beta_fold_hydrolase	MBR110_15110
QMI46832	18271	19314	+	alpha/beta_hydrolase	MBR110_15115
QMI46833	19311	19838	+	cytochrome_P460_family_protein	MBR110_15120
QMI46834	20114	20473	+	DUF4148_domain-containing_protein	MBR110_15125
QMI46835	20555	21346	+	alpha/beta_hydrolase	MBR110_15130
QMI46836	21390	22004	-	LysE_family_transporter	MBR110_15135
QMI46837	22213	23361	+	porin	MBR110_15140
QMI46838	23512	24531	-	NAD(P)-dependent_alcohol_dehydrogenase	MBR110_15145
QMI46839	24658	25611	+	LysR_family_transcriptional_regulator	MBR110_15150
QMI46840	25775	26707	-	LysR_family_transcriptional_regulator	MBR110_15155
QMI46841	26913	27686	+	putative_hydro-lyase	MBR110_15160
QMI46842	27757	29064	+	MFS_transporter	MBR110_15165
QMI46843	29182	32826	+	5-oxoprolinase	MBR110_15170
QMI46844	33499	35502	+	cyclic_di-GMP_phosphodiesterase	pdeR
Table of Blast hits (query gene, subject gene, %identity, blast score, %coverage, e-value):
AXA93797.1	QMI46816	71	537	100.279	2e-152
AXA93798.1	QMI46817	84	603	100	5e-172
AXA93799.1	QMI46818	67	352	95.9707	1e-96
AXA93800.1	QMI48566	53	589	94.1653	9e-168
AXA94869.1	QMI46820	58	337	98.6667	4e-92
AXA94869.1	QMI46821	41	223	93	6e-58
AXA93801.1	QMI46821	73	477	92.3313	2e-134
AXA93801.1	QMI46820	40	193	87.4233	7e-49
AXA93802.1	QMI46822	64	129	100	3e-30
AXA93803.1	QMI46823	70	510	96.7213	4e-144
AXA93804.1	QMI46824	48	258	94.9045	2e-68
AXA93805.1	QMI46825	70	98	100	5e-21
AXA93807.1	QMI46826	60	447	99.2366	3e-125
>>
6. CP013440
Source: Burkholderia vietnamiensis strain HI2297 chromosome 2, complete sequence.
Number of proteins with BLAST hits to this cluster: 14
MultiGeneBlast score: 14.0
Cumulative Blast bit score: 4750
Table of genes, locations, strands and annotations of subject cluster:
AOK13111	1921549	1925193	-	5-oxoprolinase	WK31_23090
AOK13112	1925311	1926618	-	MFS_transporter	WK31_23095
AOK13113	1926689	1927462	-	hypothetical_protein	WK31_23100
AOK13114	1927668	1928600	+	LysR_family_transcriptional_regulator	WK31_23105
AOK13115	1928764	1929717	-	LysR_family_transcriptional_regulator	WK31_23110
AOK13116	1929844	1930863	+	NADPH:quinone_oxidoreductase	WK31_23115
AOK13117	1931014	1932162	-	porin	WK31_23120
AOK13118	1932371	1932985	+	lysine_transporter_LysE	WK31_23125
AOK13478	1933029	1933820	-	hypothetical_protein	WK31_23130
AOK13479	1933902	1934261	-	hypothetical_protein	WK31_23135
AOK13119	1934537	1935061	-	cytochrome_C_oxidase_subunit_III	WK31_23140
AOK13120	1935061	1936104	-	alpha/beta_hydrolase	WK31_23145
AOK13121	1936351	1937628	-	multidrug_MFS_transporter	WK31_23150
AOK13122	1937809	1938405	-	pyridoxamine_5'-phosphate_oxidase	WK31_23155
AOK13123	1938496	1938681	-	molecular_chaperone	WK31_23160
AOK13124	1938692	1939891	-	2-aminoadipate_aminotransferase	WK31_23165
AOK13125	1940263	1940451	-	hypothetical_protein	WK31_23170
AOK13126	1940512	1941696	-	acetyl-CoA_acetyltransferase	WK31_23175
AOK13127	1941866	1942051	-	rubredoxin	WK31_23180
AOK13128	1942048	1942971	-	delta-12-desaturase	WK31_23185
AOK13129	1942971	1944068	-	fatty_acid_desaturase	WK31_23190
AOK13130	1944082	1944402	-	polyketide_synthase	WK31_23195
AOK13131	1944458	1945441	-	fatty_acid_desaturase	WK31_23200
AOK13132	1945467	1946426	-	fatty_acid_desaturase	WK31_23205
AOK13480	1946487	1948283	-	AMP-dependent_synthetase	WK31_23210
AOK13133	1948365	1949783	-	MFS_transporter	WK31_23215
AOK13134	1949788	1950705	-	hypothetical_protein	WK31_23220
AOK13135	1950702	1951706	-	(2Fe-2S)-binding_protein	WK31_23225
AOK13136	1951787	1952869	-	fatty_acid_desaturase	WK31_23230
AOK13137	1952978	1954363	-	FAD-binding_monooxygenase	WK31_23235
AOK13481	1954536	1955801	-	3-oxoacyl-ACP_synthase	WK31_23240
AOK13138	1955984	1956643	-	N-acylhomoserine_lactone_synthase	WK31_23245
AOK13139	1957038	1957421	-	hypothetical_protein	WK31_23250
AOK13140	1957849	1958562	+	LuxR_family_transcriptional_regulator	WK31_23255
AOK13141	1958757	1960103	+	MFS_transporter	WK31_23260
AOK13142	1960192	1960764	+	LuxR_family_transcriptional_regulator	WK31_23265
AOK13143	1960894	1962066	-	FAD-dependent_oxidoreductase	WK31_23270
AOK13144	1962211	1963362	-	branched_chain_amino_acid_ABC_transporter substrate-binding protein	WK31_23275
AOK13145	1963674	1963877	-	general_stress_protein_CsbD	WK31_23280
AOK13146	1964031	1965551	-	helix-turn-helix_transcriptional_regulator	WK31_23285
AOK13147	1966207	1966557	+	transporter	WK31_23290
AOK13482	1966611	1966808	+	hypothetical_protein	WK31_23295
AOK13148	1967035	1968069	-	calmodulin-binding_protein	WK31_23300
AOK13149	1968290	1969234	+	LysR_family_transcriptional_regulator	WK31_23305
AOK13150	1969698	1971326	+	aldehyde_dehydrogenase	WK31_23310
AOK13151	1971436	1971672	-	hypothetical_protein	WK31_23315
AOK13152	1971743	1972207	-	hypothetical_protein	WK31_23320
AOK13153	1972361	1973593	-	hypothetical_protein	WK31_23325
Table of Blast hits (query gene, subject gene, %identity, blast score, %coverage, e-value):
AXA93797.1	AOK13136	71	536	100.279	4e-152
AXA93798.1	AOK13135	84	603	100	5e-172
AXA93799.1	AOK13134	67	350	95.9707	4e-96
AXA93800.1	AOK13480	53	587	94.1653	5e-167
AXA94869.1	AOK13132	58	337	98.6667	4e-92
AXA94869.1	AOK13131	41	223	93	8e-58
AXA93801.1	AOK13131	73	478	92.3313	1e-134
AXA93801.1	AOK13132	40	193	87.4233	7e-49
AXA93802.1	AOK13130	64	129	100	3e-30
AXA93803.1	AOK13129	70	510	96.7213	4e-144
AXA93804.1	AOK13128	48	259	94.9045	1e-68
AXA93805.1	AOK13127	70	98	100	5e-21
AXA93807.1	AOK13126	60	447	99.2366	3e-125
>>
7. CP013422
Source: Burkholderia ubonensis strain MSMB0783 chromosome 2, complete sequence.
Number of proteins with BLAST hits to this cluster: 14
MultiGeneBlast score: 14.0
Cumulative Blast bit score: 4750
Table of genes, locations, strands and annotations of subject cluster:
AOJ77585	240828	241292	+	hypothetical_protein	WJ35_21050
AOJ77586	241363	241599	+	hypothetical_protein	WJ35_21055
AOJ77587	241709	243337	-	aldehyde_dehydrogenase	WJ35_21060
AOJ77588	243801	244745	-	LysR_family_transcriptional_regulator	WJ35_21065
AOJ77589	244970	246004	+	calmodulin-binding_protein	WJ35_21070
AOJ79012	246231	246428	-	hypothetical_protein	WJ35_21075
AOJ77590	246482	246832	-	transporter	WJ35_21080
AOJ77591	247488	249008	+	helix-turn-helix_transcriptional_regulator	WJ35_21085
AOJ77592	249162	249365	+	general_stress_protein_CsbD	WJ35_21090
AOJ77593	249677	250828	+	branched_chain_amino_acid_ABC_transporter substrate-binding protein	WJ35_21095
AOJ77594	250947	252119	+	FAD-dependent_oxidoreductase	WJ35_21100
AOJ77595	252249	252821	-	LuxR_family_transcriptional_regulator	WJ35_21105
AOJ77596	252910	254256	-	MFS_transporter	WJ35_21110
AOJ77597	254451	255164	-	LuxR_family_transcriptional_regulator	WJ35_21115
AOJ77598	255592	255975	+	hypothetical_protein	WJ35_21120
AOJ77599	256370	257029	+	N-acylhomoserine_lactone_synthase	WJ35_21125
AOJ79013	257212	258477	+	3-oxoacyl-ACP_synthase	WJ35_21130
AOJ77600	258650	260035	+	FAD-binding_monooxygenase	WJ35_21135
AOJ77601	260144	261226	+	fatty_acid_desaturase	WJ35_21140
AOJ77602	261307	262311	+	(2Fe-2S)-binding_protein	WJ35_21145
AOJ77603	262308	263225	+	hypothetical_protein	WJ35_21150
AOJ77604	263230	264648	+	MFS_transporter	WJ35_21155
AOJ79014	264730	266526	+	AMP-dependent_synthetase	WJ35_21160
AOJ77605	266587	267546	+	fatty_acid_desaturase	WJ35_21165
AOJ77606	267572	268555	+	fatty_acid_desaturase	WJ35_21170
AOJ77607	268611	268931	+	polyketide_synthase	WJ35_21175
AOJ77608	268945	270042	+	fatty_acid_desaturase	WJ35_21180
AOJ77609	270042	270965	+	delta-12-desaturase	WJ35_21185
AOJ77610	270962	271147	+	rubredoxin	WJ35_21190
AOJ77611	271317	272501	+	acetyl-CoA_acetyltransferase	WJ35_21195
AOJ77612	272562	272750	+	hypothetical_protein	WJ35_21200
AOJ77613	273122	274321	+	2-aminoadipate_aminotransferase	WJ35_21205
AOJ79015	274332	274517	+	molecular_chaperone	WJ35_21210
AOJ77614	274608	275204	+	pyridoxamine_5'-phosphate_oxidase	WJ35_21215
AOJ77615	275385	276662	+	multidrug_MFS_transporter	WJ35_21220
AOJ77616	277935	278471	+	cytochrome_C_oxidase_subunit_III	WJ35_21230
AOJ77617	278727	279065	+	hypothetical_protein	WJ35_21235
AOJ77618	279089	279880	+	hypothetical_protein	WJ35_21240
AOJ77619	279924	280538	-	lysine_transporter_LysE	WJ35_21245
AOJ77620	280747	281895	+	porin	WJ35_21250
AOJ77621	282046	283065	-	NADPH:quinone_oxidoreductase	WJ35_21255
AOJ77622	283192	284145	+	LysR_family_transcriptional_regulator	WJ35_21260
AOJ77623	284309	285241	-	LysR_family_transcriptional_regulator	WJ35_21265
AOJ77624	285447	286220	+	hypothetical_protein	WJ35_21270
AOJ77625	286291	287598	+	MFS_transporter	WJ35_21275
AOJ77626	287716	291360	+	5-oxoprolinase	WJ35_21280
AOJ77627	292032	294035	+	RNase_II_stability_modulator	WJ35_21285
Table of Blast hits (query gene, subject gene, %identity, blast score, %coverage, e-value):
AXA93797.1	AOJ77601	71	536	100.279	4e-152
AXA93798.1	AOJ77602	84	603	100	5e-172
AXA93799.1	AOJ77603	67	350	95.9707	4e-96
AXA93800.1	AOJ79014	53	587	94.1653	5e-167
AXA94869.1	AOJ77605	58	337	98.6667	4e-92
AXA94869.1	AOJ77606	41	223	93	8e-58
AXA93801.1	AOJ77606	73	478	92.3313	1e-134
AXA93801.1	AOJ77605	40	193	87.4233	7e-49
AXA93802.1	AOJ77607	64	129	100	3e-30
AXA93803.1	AOJ77608	70	510	96.7213	4e-144
AXA93804.1	AOJ77609	48	259	94.9045	1e-68
AXA93805.1	AOJ77610	70	98	100	5e-21
AXA93807.1	AOJ77611	60	447	99.2366	3e-125
>>
8. CP020396
Source: Burkholderia vietnamiensis strain FDAARGOS_239 chromosome 2, complete sequence.
Number of proteins with BLAST hits to this cluster: 14
MultiGeneBlast score: 14.0
Cumulative Blast bit score: 4749
Table of genes, locations, strands and annotations of subject cluster:
AVR13407	1871578	1872042	+	DUF2846_domain-containing_protein	A8H33_08210
AVR13408	1872113	1872349	+	hypothetical_protein	A8H33_08215
AVR13409	1872459	1874087	-	NADP-dependent_glyceraldehyde-3-phosphate dehydrogenase	A8H33_08220
AVR13410	1874548	1875492	-	LysR_family_transcriptional_regulator	A8H33_08225
AVR13411	1875714	1876748	+	DUF1338_domain-containing_protein	A8H33_08230
AVR13857	1876975	1877172	-	CsbD_family_protein	A8H33_08235
AVR13412	1877226	1877576	-	BON_domain-containing_protein	A8H33_08240
AVR13413	1878210	1879730	+	PAS_domain_S-box_protein	A8H33_08245
AVR13414	1879884	1880087	+	CsbD_family_protein	A8H33_08250
AVR13415	1880398	1881549	+	branched-chain_amino_acid_ABC_transporter substrate-binding protein	A8H33_08255
AVR13416	1881694	1882866	+	FAD-binding_oxidoreductase	A8H33_08260
AVR13417	1882996	1883568	-	PAS_domain-containing_protein	A8H33_08265
AVR13418	1883657	1885003	-	MFS_transporter	A8H33_08270
AVR13419	1885198	1885911	-	LuxR_family_transcriptional_regulator	A8H33_08275
AVR13420	1886339	1886722	+	DUF4902_domain-containing_protein	A8H33_08280
AVR13421	1887115	1887774	+	GNAT_family_N-acetyltransferase	A8H33_08285
AVR13422	1887930	1889222	+	beta-ketoacyl-[acyl-carrier-protein]_synthase II	fabF
AVR13423	1889395	1890780	+	NAD(P)/FAD-dependent_oxidoreductase	A8H33_08295
AVR13424	1890889	1891971	+	fatty_acid_desaturase	A8H33_08300
AVR13425	1892052	1893056	+	aromatic_ring-hydroxylating_dioxygenase_subunit alpha	A8H33_08305
AVR13426	1893053	1893970	+	hypothetical_protein	A8H33_08310
AVR13427	1893975	1895393	+	MFS_transporter	A8H33_08315
AVR13858	1895475	1897271	+	AMP-dependent_synthetase	A8H33_08320
AVR13428	1897332	1898291	+	acyl-CoA_desaturase	A8H33_08325
AVR13429	1898317	1899300	+	acyl-CoA_desaturase	A8H33_08330
AVR13430	1899356	1899676	+	polyketide_synthase	A8H33_08335
AVR13431	1899690	1900787	+	fatty_acid_desaturase	A8H33_08340
AVR13432	1900787	1901710	+	delta-12-desaturase	A8H33_08345
AVR13433	1901707	1901892	+	rubredoxin	A8H33_08350
AVR13434	1902060	1903244	+	acetyl-CoA_C-acyltransferase	A8H33_08355
AVR13435	1903305	1903493	+	hypothetical_protein	A8H33_08360
A8H33_08365	1903723	1903903	-	hypothetical_protein	no_locus_tag
AVR13436	1903874	1905073	+	PLP-dependent_aminotransferase_family_protein	A8H33_08370
AVR13437	1905084	1905269	+	hypothetical_protein	A8H33_08375
AVR13438	1905360	1905956	+	pyridoxamine_5'-phosphate_oxidase	A8H33_08380
AVR13439	1906137	1907414	+	multidrug_MFS_transporter	A8H33_08385
AVR13440	1907661	1908704	+	alpha/beta_hydrolase	A8H33_08390
AVR13441	1908704	1909228	+	cytochrome_C_oxidase_subunit_III	A8H33_08395
AVR13859	1909504	1909863	+	DUF4148_domain-containing_protein	A8H33_08400
AVR13860	1909945	1910736	+	alpha/beta_hydrolase	A8H33_08405
AVR13442	1910780	1911394	-	lysine_transporter_LysE	A8H33_08410
AVR13443	1911603	1912751	+	porin	A8H33_08415
AVR13444	1912902	1913921	-	NAD(P)-dependent_alcohol_dehydrogenase	A8H33_08420
AVR13445	1914048	1915001	+	LysR_family_transcriptional_regulator	A8H33_08425
AVR13446	1915166	1916098	-	LysR_family_transcriptional_regulator	A8H33_08430
AVR13447	1916104	1916307	+	hypothetical_protein	A8H33_08435
AVR13448	1916304	1917077	+	DUF1445_domain-containing_protein	A8H33_08440
AVR13449	1917148	1918455	+	MFS_transporter	A8H33_08445
AVR13450	1918573	1922217	+	5-oxoprolinase	A8H33_08450
AVR13451	1922889	1924892	+	cyclic_di-GMP_phosphodiesterase	A8H33_08455
Table of Blast hits (query gene, subject gene, %identity, blast score, %coverage, e-value):
AXA93797.1	AVR13424	71	536	100.279	4e-152
AXA93798.1	AVR13425	84	603	100	5e-172
AXA93799.1	AVR13426	68	353	94.1392	6e-97
AXA93800.1	AVR13858	53	586	94.4895	9e-167
AXA94869.1	AVR13428	58	337	98.6667	5e-92
AXA94869.1	AVR13429	41	222	93	1e-57
AXA93801.1	AVR13429	72	476	92.3313	4e-134
AXA93801.1	AVR13428	40	193	87.4233	7e-49
AXA93802.1	AVR13430	64	129	100	3e-30
AXA93803.1	AVR13431	70	510	96.7213	4e-144
AXA93804.1	AVR13432	48	259	94.9045	1e-68
AXA93805.1	AVR13433	70	98	100	5e-21
AXA93807.1	AVR13434	60	447	99.2366	3e-125
>>
9. CP009630
Source: Burkholderia vietnamiensis LMG 10929 chromosome II, complete sequence.
Number of proteins with BLAST hits to this cluster: 14
MultiGeneBlast score: 14.0
Cumulative Blast bit score: 4749
Table of genes, locations, strands and annotations of subject cluster:
AJY04638	1903969	1907613	-	hydantoinase/oxoprolinase_family_protein	AK36_4667
AJY03300	1907731	1909038	-	sugar_(and_other)_transporter_family_protein	AK36_4668
AJY04805	1909109	1909882	-	hypothetical_protein	AK36_4669
AJY03328	1910088	1911020	+	bacterial_regulatory_helix-turn-helix,_lysR family protein	AK36_4670
AJY04500	1911185	1912138	-	bacterial_regulatory_helix-turn-helix,_lysR family protein	AK36_4671
AJY04676	1912265	1913284	+	zinc-binding_dehydrogenase_family_protein	AK36_4672
AJY04789	1913435	1914583	-	gram-negative_porin_family_protein	AK36_4673
AJY03125	1914792	1915406	+	lysE_type_translocator_family_protein	AK36_4674
AJY04018	1915450	1916241	-	serine_hydrolase_family_protein	AK36_4675
AJY04504	1916323	1916682	-	hypothetical_protein	AK36_4676
AJY03896	1916958	1917482	-	putative_cytochrome_P460	AK36_4677
AJY03939	1917482	1918525	-	alpha/beta_hydrolase_family_protein	AK36_4678
AJY04764	1918772	1920049	-	hypothetical_protein	AK36_4679
AJY04298	1920230	1920826	-	pyridoxamine_5'-phosphate_oxidase_family protein	AK36_4680
AJY04367	1920917	1921102	-	hypothetical_protein	AK36_4681
AJY05031	1921113	1922312	-	aminotransferase_class_I_and_II_family_protein	AK36_4682
AJY03898	1922693	1922881	-	hypothetical_protein	AK36_4683
AJY04228	1922942	1924126	-	acetyl-CoA_acetyltransferase	thlA
AJY04955	1924294	1924479	-	rubredoxin_family_protein	AK36_4685
AJY03248	1924476	1925399	-	serine_hydrolase_family_protein	AK36_4686
AJY03781	1925399	1926496	-	fatty_acid_desaturase_family_protein	AK36_4687
AJY03221	1926510	1926830	-	phosphopantetheine_attachment_site_family protein	AK36_4688
AJY03133	1926886	1927869	-	fatty_acid_desaturase_family_protein	AK36_4689
AJY04369	1927895	1928854	-	fatty_acid_desaturase_family_protein	AK36_4690
AJY03473	1928915	1930711	-	AMP-binding_enzyme_family_protein	AK36_4691
AJY04115	1930793	1932211	-	major_Facilitator_Superfamily_protein	AK36_4692
AJY04074	1932216	1933133	-	hypothetical_protein	AK36_4693
AJY03742	1933130	1934134	-	rieske_[2Fe-2S]_domain_protein	AK36_4694
AJY04596	1934215	1935297	-	fatty_acid_desaturase_family_protein	AK36_4695
AJY03236	1935406	1936791	-	FAD_dependent_oxidoreductase_family_protein	AK36_4696
AJY03612	1936964	1938256	-	beta-ketoacyl-acyl-carrier-protein_synthase_II	fabF
AJY03399	1938412	1939071	-	autoinducer_synthetase_family_protein	AK36_4698
AJY03991	1939464	1939847	-	hypothetical_protein	AK36_4699
AJY04496	1940275	1940988	+	bacterial_regulatory_s,_luxR_family_protein	AK36_4700
AJY03960	1941183	1942529	+	sugar_(and_other)_transporter_family_protein	AK36_4701
AJY03416	1942618	1943190	+	sensory_box_protein	AK36_4702
AJY04528	1943320	1944492	-	pyridine_nucleotide-disulfide_oxidoreductase family protein	AK36_4703
AJY03663	1944637	1945788	-	receptor_ligand_binding_region_family_protein	AK36_4704
AJY03929	1946099	1946302	-	csbD-like_family_protein	AK36_4705
AJY03254	1946456	1947964	-	sensory_box_protein	AK36_4706
AJY03131	1948360	1948524	+	hypothetical_protein	AK36_4707
AJY04072	1948610	1948960	+	BON_domain_protein	AK36_4708
AJY03727	1949014	1949211	+	hypothetical_protein	AK36_4709
AJY04726	1949438	1950472	-	hypothetical_protein	AK36_4710
AJY04303	1950694	1951638	+	bacterial_regulatory_helix-turn-helix,_lysR family protein	AK36_4711
AJY04029	1952099	1953727	+	aldehyde_dehydrogenase_family_protein	AK36_4712
AJY04930	1953837	1954073	-	putative_membrane_protein	AK36_4713
AJY04002	1954144	1954608	-	hypothetical_protein	AK36_4714
AJY04682	1954762	1955988	-	hypothetical_protein	AK36_4715
Table of Blast hits (query gene, subject gene, %identity, blast score, %coverage, e-value):
AXA93797.1	AJY04596	71	536	100.279	4e-152
AXA93798.1	AJY03742	84	603	100	5e-172
AXA93799.1	AJY04074	68	353	94.1392	6e-97
AXA93800.1	AJY03473	53	586	94.4895	9e-167
AXA94869.1	AJY04369	58	337	98.6667	5e-92
AXA94869.1	AJY03133	41	222	93	1e-57
AXA93801.1	AJY03133	72	476	92.3313	4e-134
AXA93801.1	AJY04369	40	193	87.4233	7e-49
AXA93802.1	AJY03221	64	129	100	3e-30
AXA93803.1	AJY03781	70	510	96.7213	4e-144
AXA93804.1	AJY03248	48	259	94.9045	1e-68
AXA93805.1	AJY04955	70	98	100	5e-21
AXA93807.1	AJY04228	60	447	99.2366	3e-125
>>
10. CP000615
Source: Burkholderia vietnamiensis G4 chromosome 2, complete sequence.
Number of proteins with BLAST hits to this cluster: 14
MultiGeneBlast score: 14.0
Cumulative Blast bit score: 4749
Table of genes, locations, strands and annotations of subject cluster:
ABO56974	774120	775106	+	transposase,_IS4_family	Bcep1808_3993
ABO56975	775461	776204	+	hypothetical_protein	Bcep1808_3994
ABO56976	776345	776599	+	hypothetical_protein	Bcep1808_3995
ABO56977	777160	777429	+	hypothetical_protein	Bcep1808_3996
ABO56978	777855	779609	+	Polypeptide-transport-associated_domain_protein, ShlB-type	Bcep1808_3997
ABO56979	779884	780468	+	conserved_hypothetical_protein	Bcep1808_3998
ABO56980	780511	782115	+	hypothetical_protein	Bcep1808_3999
ABO56981	782313	783368	-	Integrase,_catalytic_region	Bcep1808_4000
ABO56982	783946	784605	+	autoinducer_synthesis_protein	Bcep1808_4001
ABO56983	784761	786053	+	3-oxoacyl-[acyl-carrier-protein]_synthase_II	Bcep1808_4002
ABO56984	786226	787611	+	monooxygenase,_FAD-binding_protein	Bcep1808_4003
ABO56985	787720	788802	+	fatty_acid_desaturase	Bcep1808_4004
ABO56986	788883	789887	+	Rieske_(2Fe-2S)_domain_protein	Bcep1808_4005
ABO56987	789884	790801	+	hypothetical_protein	Bcep1808_4006
ABO56988	790806	792224	+	major_facilitator_superfamily_MFS_1	Bcep1808_4007
ABO56989	792306	794102	+	AMP-dependent_synthetase_and_ligase	Bcep1808_4008
ABO56990	794163	795122	+	Stearoyl-CoA_9-desaturase	Bcep1808_4009
ABO56991	795148	796131	+	Delta-9_acyl-phospholipid_desaturase	Bcep1808_4010
ABO56992	796187	796507	+	phosphopantetheine-binding_protein	Bcep1808_4011
ABO56993	796521	797618	+	fatty_acid_desaturase	Bcep1808_4012
ABO56994	797618	798541	+	delta_12_desaturase	Bcep1808_4013
ABO56995	798538	798723	+	Rubredoxin-type_Fe(Cys)4_protein	Bcep1808_4014
ABO56996	798893	800077	+	acetyl-CoA_acetyltransferase	Bcep1808_4015
ABO56997	800698	801897	+	putative_transcriptional_regulator,_GntR_family	Bcep1808_4016
ABO56998	801908	802093	+	conserved_hypothetical_protein	Bcep1808_4017
ABO56999	802184	802780	+	pyridoxamine_5'-phosphate_oxidase-related, FMN-binding protein	Bcep1808_4018
ABO57000	802961	804238	+	Epoxide_hydrolase_domain_protein	Bcep1808_4019
ABO57001	804485	805528	+	alpha/beta_hydrolase_fold_protein	Bcep1808_4020
ABO57002	805528	806061	+	conserved_hypothetical_protein	Bcep1808_4021
ABO57003	806259	806696	+	conserved_hypothetical_protein	Bcep1808_4022
ABO57004	806778	807569	+	conserved_hypothetical_protein	Bcep1808_4023
ABO57005	807613	808227	-	Lysine_exporter_protein_(LYSE/YGGA)	Bcep1808_4024
ABO57006	808436	809584	+	porin,_Gram-negative_type	Bcep1808_4025
ABO57007	809735	810754	-	Alcohol_dehydrogenase,_zinc-binding_domain protein	Bcep1808_4026
ABO57008	810881	811834	+	transcriptional_regulator,_LysR_family	Bcep1808_4027
ABO57009	811998	812930	-	transcriptional_regulator,_LysR_family	Bcep1808_4028
ABO57010	813136	813909	+	protein_of_unknown_function_DUF1445	Bcep1808_4029
ABO57011	813980	815287	+	major_facilitator_superfamily_MFS_1	Bcep1808_4030
ABO57012	815405	819049	+	5-oxoprolinase_(ATP-hydrolyzing)	Bcep1808_4031
ABO57013	819721	821724	+	diguanylate_cyclase/phosphodiesterase	Bcep1808_4032
Table of Blast hits (query gene, subject gene, %identity, blast score, %coverage, e-value):
AXA93797.1	ABO56985	71	536	100.279	4e-152
AXA93798.1	ABO56986	84	603	100	2e-172
AXA93799.1	ABO56987	69	353	94.1392	6e-97
AXA93800.1	ABO56989	53	585	94.1653	1e-166
AXA94869.1	ABO56990	58	336	98.6667	8e-92
AXA94869.1	ABO56991	41	223	93	6e-58
AXA93801.1	ABO56991	73	477	92.3313	2e-134
AXA93801.1	ABO56990	40	193	87.4233	9e-49
AXA93802.1	ABO56992	64	129	100	3e-30
AXA93803.1	ABO56993	70	510	96.7213	4e-144
AXA93804.1	ABO56994	48	259	94.9045	1e-68
AXA93805.1	ABO56995	70	98	100	5e-21
AXA93807.1	ABO56996	60	447	99.2366	3e-125
>>
11. CP013455
Source: Burkholderia vietnamiensis strain MSMB608WGS chromosome 2, complete sequence.
Number of proteins with BLAST hits to this cluster: 14
MultiGeneBlast score: 14.0
Cumulative Blast bit score: 4747
Table of genes, locations, strands and annotations of subject cluster:
AOK42809	250148	250612	+	hypothetical_protein	WL96_16795
AOK42810	250683	250919	+	hypothetical_protein	WL96_16800
AOK42811	251029	252657	-	aldehyde_dehydrogenase	WL96_16805
AOK42812	253118	254062	-	LysR_family_transcriptional_regulator	WL96_16810
AOK42813	254284	255318	+	calmodulin-binding_protein	WL96_16815
AOK44302	255545	255742	-	hypothetical_protein	WL96_16820
AOK42814	255796	256146	-	transporter	WL96_16825
AOK42815	256772	258292	+	helix-turn-helix_transcriptional_regulator	WL96_16830
AOK42816	258446	258649	+	general_stress_protein_CsbD	WL96_16835
AOK42817	258961	260112	+	branched_chain_amino_acid_ABC_transporter substrate-binding protein	WL96_16840
AOK42818	260257	261429	+	FAD-dependent_oxidoreductase	WL96_16845
AOK42819	261559	262131	-	LuxR_family_transcriptional_regulator	WL96_16850
AOK42820	262220	263566	-	MFS_transporter	WL96_16855
AOK42821	263761	264474	-	LuxR_family_transcriptional_regulator	WL96_16860
AOK42822	264902	265285	+	hypothetical_protein	WL96_16865
AOK42823	265679	266338	+	N-acylhomoserine_lactone_synthase	WL96_16870
AOK44303	266521	267786	+	3-oxoacyl-ACP_synthase	WL96_16875
AOK42824	267959	269344	+	FAD-binding_monooxygenase	WL96_16880
AOK42825	269453	270535	+	fatty_acid_desaturase	WL96_16885
AOK42826	270616	271620	+	(2Fe-2S)-binding_protein	WL96_16890
AOK42827	271617	272534	+	hypothetical_protein	WL96_16895
AOK42828	272539	273957	+	MFS_transporter	WL96_16900
AOK44304	274039	275835	+	AMP-dependent_synthetase	WL96_16905
AOK42829	275896	276855	+	fatty_acid_desaturase	WL96_16910
AOK42830	276881	277864	+	fatty_acid_desaturase	WL96_16915
AOK42831	277920	278240	+	polyketide_synthase	WL96_16920
AOK42832	278254	279351	+	fatty_acid_desaturase	WL96_16925
AOK42833	279351	280274	+	delta-12-desaturase	WL96_16930
AOK42834	280271	280456	+	rubredoxin	WL96_16935
AOK42835	280626	281810	+	acetyl-CoA_acetyltransferase	WL96_16940
AOK42836	281855	282043	+	hypothetical_protein	WL96_16945
AOK42837	282410	283609	+	2-aminoadipate_aminotransferase	WL96_16950
AOK42838	283620	283805	+	molecular_chaperone	WL96_16955
AOK42839	283896	284492	+	pyridoxamine_5'-phosphate_oxidase	WL96_16960
AOK42840	284673	285950	+	multidrug_MFS_transporter	WL96_16965
AOK42841	286197	287240	+	alpha/beta_hydrolase	WL96_16970
AOK42842	287240	287764	+	cytochrome_C_oxidase_subunit_III	WL96_16975
AOK44305	288040	288399	+	hypothetical_protein	WL96_16980
AOK44306	288481	289272	+	hypothetical_protein	WL96_16985
AOK42843	289316	289930	-	lysine_transporter_LysE	WL96_16990
AOK42844	290139	291287	+	porin	WL96_16995
AOK42845	291438	292457	-	NADPH:quinone_oxidoreductase	WL96_17000
AOK42846	292584	293537	+	LysR_family_transcriptional_regulator	WL96_17005
AOK44307	293827	295134	+	MFS_transporter	WL96_17010
AOK42847	295193	295906	-	hypothetical_protein	WL96_17015
AOK42848	296190	297122	-	LysR_family_transcriptional_regulator	WL96_17020
AOK42849	297328	298101	+	hypothetical_protein	WL96_17025
AOK42850	298172	299479	+	MFS_transporter	WL96_17030
AOK42851	299597	303241	+	5-oxoprolinase	WL96_17035
Table of Blast hits (query gene, subject gene, %identity, blast score, %coverage, e-value):
AXA93797.1	AOK42825	71	536	100.279	4e-152
AXA93798.1	AOK42826	84	603	100	5e-172
AXA93799.1	AOK42827	67	352	95.9707	1e-96
AXA93800.1	AOK44304	53	587	94.1653	7e-167
AXA94869.1	AOK42829	58	336	98.6667	7e-92
AXA94869.1	AOK42830	41	221	93	3e-57
AXA93801.1	AOK42830	72	475	92.3313	8e-134
AXA93801.1	AOK42829	40	193	87.4233	7e-49
AXA93802.1	AOK42831	64	129	100	3e-30
AXA93803.1	AOK42832	70	510	96.7213	4e-144
AXA93804.1	AOK42833	48	259	94.9045	1e-68
AXA93805.1	AOK42834	70	98	100	5e-21
AXA93807.1	AOK42835	60	448	99.2366	2e-125
>>
12. CP013394
Source: Burkholderia vietnamiensis strain FL-2-3-30-S1-D0 chromosome 2, complete sequence.
Number of proteins with BLAST hits to this cluster: 14
MultiGeneBlast score: 14.0
Cumulative Blast bit score: 4736
Table of genes, locations, strands and annotations of subject cluster:
AOJ15127	251593	254691	-	multidrug_transporter	WJ02_15770
AOJ15128	254688	255809	-	hemolysin_secretion_protein_D	WJ02_15775
AOJ15129	255886	256503	-	AcrR_family_transcriptional_regulator	WJ02_15780
AOJ16736	256600	258066	+	RND_transporter	WJ02_15785
AOJ15130	258524	259240	+	hypothetical_protein	WJ02_15790
AOJ15131	259613	261082	+	catalase	WJ02_15795
AOJ15132	261150	261791	+	phosphohydrolase	WJ02_15800
AOJ15133	261963	262709	+	oxidoreductase	WJ02_15805
AOJ16737	262826	263371	+	carbonic_anhydrase	WJ02_15810
AOJ15134	263425	263997	-	LuxR_family_transcriptional_regulator	WJ02_15815
AOJ15135	264086	265432	-	MFS_transporter	WJ02_15820
AOJ15136	265637	266350	-	LuxR_family_transcriptional_regulator	WJ02_15825
AOJ15137	266778	267161	+	hypothetical_protein	WJ02_15830
AOJ15138	267553	268212	+	N-acylhomoserine_lactone_synthase	WJ02_15835
AOJ16738	268395	269660	+	3-oxoacyl-ACP_synthase	WJ02_15840
AOJ15139	269833	271245	+	FAD-binding_monooxygenase	WJ02_15845
AOJ15140	271354	272436	+	fatty_acid_desaturase	WJ02_15850
AOJ15141	272517	273521	+	(2Fe-2S)-binding_protein	WJ02_15855
AOJ15142	273518	274453	+	hypothetical_protein	WJ02_15860
AOJ15143	274458	275876	+	MFS_transporter	WJ02_15865
AOJ16739	275958	277763	+	AMP-dependent_synthetase	WJ02_15870
AOJ15144	277824	278783	+	fatty_acid_desaturase	WJ02_15875
AOJ15145	278809	279792	+	fatty_acid_desaturase	WJ02_15880
AOJ15146	279848	280168	+	polyketide_synthase	WJ02_15885
AOJ15147	280182	281279	+	fatty_acid_desaturase	WJ02_15890
AOJ15148	281279	282202	+	delta-12-desaturase	WJ02_15895
AOJ16740	282214	282384	+	rubredoxin	WJ02_15900
AOJ15149	282554	283738	+	acetyl-CoA_acetyltransferase	WJ02_15905
AOJ15150	283799	283987	+	hypothetical_protein	WJ02_15910
AOJ15151	284358	285557	+	2-aminoadipate_aminotransferase	WJ02_15915
AOJ15152	285568	285765	+	molecular_chaperone	WJ02_15920
AOJ15153	285856	286452	+	pyridoxamine_5'-phosphate_oxidase	WJ02_15925
AOJ15154	286633	287910	+	multidrug_MFS_transporter	WJ02_15930
AOJ15155	288182	289225	+	alpha/beta_hydrolase	WJ02_15935
AOJ15156	289225	289737	+	cytochrome_C_oxidase_subunit_III	WJ02_15940
AOJ16741	290013	290372	+	hypothetical_protein	WJ02_15945
AOJ16742	290454	291245	+	hypothetical_protein	WJ02_15950
AOJ15157	291289	291903	-	lysine_transporter_LysE	WJ02_15955
AOJ15158	292112	293260	+	porin	WJ02_15960
AOJ15159	293426	294445	-	NADPH:quinone_oxidoreductase	WJ02_15965
AOJ15160	294572	295525	+	LysR_family_transcriptional_regulator	WJ02_15970
AOJ15161	295814	297121	+	MFS_transporter	WJ02_15975
AOJ15162	297180	297911	-	hypothetical_protein	WJ02_15980
AOJ15163	298177	299109	-	LysR_family_transcriptional_regulator	WJ02_15985
AOJ15164	299315	300088	+	hypothetical_protein	WJ02_15990
AOJ15165	300159	301466	+	MFS_transporter	WJ02_15995
AOJ15166	301584	305228	+	5-oxoprolinase	WJ02_16000
Table of Blast hits (query gene, subject gene, %identity, blast score, %coverage, e-value):
AXA93797.1	AOJ15140	70	533	100.279	3e-151
AXA93798.1	AOJ15141	84	602	99.7006	9e-172
AXA93799.1	AOJ15142	69	352	92.674	1e-96
AXA93800.1	AOJ16739	54	587	94.1653	6e-167
AXA94869.1	AOJ15144	57	334	98.6667	3e-91
AXA94869.1	AOJ15145	41	222	93	1e-57
AXA93801.1	AOJ15145	72	476	92.3313	4e-134
AXA93801.1	AOJ15144	38	192	88.6503	2e-48
AXA93802.1	AOJ15146	63	128	100	5e-30
AXA93803.1	AOJ15147	70	510	96.7213	4e-144
AXA93804.1	AOJ15148	48	259	94.9045	1e-68
AXA93805.1	AOJ16740	74	94	90.1639	1e-19
AXA93807.1	AOJ15149	60	447	99.2366	3e-125
>>
13. CP003515
Source: Burkholderia sp. KJ006 chromosome 2, complete sequence.
Number of proteins with BLAST hits to this cluster: 14
MultiGeneBlast score: 14.0
Cumulative Blast bit score: 4736
Table of genes, locations, strands and annotations of subject cluster:
AFJ88024	808552	809016	+	hypothetical_protein	MYA_3666
AFJ88025	809204	809323	+	hypothetical_protein	MYA_3667
AFJ88026	809433	811061	-	Glyceraldehyde-3-phosphate_dehydrogenase, putative	MYA_3668
AFJ88027	811522	812466	-	Transcriptional_regulator,_LysR_family	MYA_3669
AFJ88028	812687	813721	+	hypothetical_protein	MYA_3670
AFJ88029	813948	814145	-	hypothetical_protein	MYA_3671
AFJ88030	815176	816696	+	Sensory_box_Transcriptional_regulator,_LuxR family	MYA_3672
AFJ88031	816850	817053	+	hypothetical_protein	MYA_3673
AFJ88032	817364	818515	+	Leucine-,_isoleucine-,_valine-,_threonine-,_and alanine-binding protein	MYA_3674
AFJ88033	818660	819832	+	Sarcosine_oxidase_beta_subunit	MYA_3675
AFJ88034	819962	820606	-	Transcriptional_regulator,_LuxR_family	MYA_3676
AFJ88035	820623	821969	-	major_facilitator_family_transporter	MYA_3677
AFJ88036	822164	822877	-	DNA-binding_HTH_domain-containing_protein	MYA_3678
AFJ88037	823380	823688	+	hypothetical_protein	MYA_3679
AFJ88038	823693	823836	+	hypothetical_protein	MYA_3680
AFJ88039	824081	824740	+	Homoserine_lactone_synthase	MYA_3681
AFJ88040	824962	826188	+	3-oxoacyl-acyl_carrier_protein_synthase_II	MYA_3682
AFJ88041	826364	826492	-	hypothetical_protein	MYA_3683
AFJ88042	826511	827746	+	monooxygenase,_FAD-binding_protein	MYA_3684
AFJ88043	827855	828937	+	Fatty_acid_desaturase	MYA_3685
AFJ88044	829018	830022	+	Vanillate_O-demethylase_oxygenase_subunit	MYA_3686
AFJ88045	830019	830936	+	hypothetical_protein	MYA_3687
AFJ88046	830956	832359	+	Permease_of_the_major_facilitator_superfamily	MYA_3688
AFJ88047	832441	834237	+	Long-chain-fatty-acid-CoA_ligase	MYA_3689
AFJ88048	834298	835257	+	Fatty_acid_desaturase,_Delta-9_fatty_acid desaturase	MYA_3690
AFJ88049	835283	836266	+	Stearoyl-CoA_9-desaturase	MYA_3691
AFJ88050	836322	836642	+	Acyl_carrier_protein	MYA_3692
AFJ88051	836656	837753	+	Fatty_acid_desaturase	MYA_3693
AFJ88052	837753	838676	+	Fatty_acid_desaturase	MYA_3694
AFJ88053	838694	838858	+	Rubredoxin	MYA_3695
AFJ88054	838927	839046	+	hypothetical_protein	MYA_3696
AFJ88055	839028	840212	+	3-ketoacyl-CoA_thiolase/Acetyl-CoA acetyltransferase	MYA_3697
AFJ88056	840273	840461	+	hypothetical_protein	MYA_3698
AFJ88057	840425	840796	-	hypothetical_protein	MYA_3699
AFJ88058	840812	842011	+	Aspartate_aminotransferase	MYA_3700
AFJ88059	842022	842207	+	Chaperonin_GroEL_HSP60_family	MYA_3701
AFJ88060	842298	842894	+	Pyridoxamine_5'-phosphate_oxidase	MYA_3702
AFJ88061	843064	844341	+	Epoxide_hydrolase	MYA_3703
AFJ88062	844338	844484	+	hypothetical_protein	MYA_3704
AFJ88063	844588	845631	+	Epoxide_hydrolase	MYA_3705
AFJ88064	845631	846155	+	hypothetical_protein	MYA_3706
AFJ88065	846395	846790	+	hypothetical_protein	MYA_3707
AFJ88066	846872	847663	+	Putative_signal_peptide_protein	MYA_3708
AFJ88067	847707	848321	-	Threonine_efflux_protein	MYA_3709
AFJ88068	848530	849678	+	Porin	MYA_3710
AFJ88069	849829	850905	-	Alcohol_dehydrogenase	MYA_3711
AFJ88070	850975	851928	+	Transcriptional_regulator,_LysR_family	MYA_3712
AFJ88071	852146	853525	+	Nitrate/nitrite_transporter	MYA_3713
AFJ88072	854581	855513	-	Transcriptional_regulator,_LysR_family	MYA_3714
AFJ88073	855719	856492	+	hypothetical_protein	MYA_3715
AFJ88074	856563	857870	+	Sialic_acid_transporter_NanT	MYA_3716
AFJ88075	857890	858003	-	hypothetical_protein	MYA_3717
AFJ88076	857989	861633	+	5-oxoprolinase	MYA_3718
Table of Blast hits (query gene, subject gene, %identity, blast score, %coverage, e-value):
AXA93797.1	AFJ88043	71	536	100.279	4e-152
AXA93798.1	AFJ88044	84	603	100	3e-172
AXA93799.1	AFJ88045	68	351	94.1392	2e-96
AXA93800.1	AFJ88047	54	584	94.4895	5e-166
AXA94869.1	AFJ88048	58	336	98.6667	7e-92
AXA94869.1	AFJ88049	41	221	93	3e-57
AXA93801.1	AFJ88049	72	475	92.3313	8e-134
AXA93801.1	AFJ88048	40	193	87.4233	7e-49
AXA93802.1	AFJ88050	64	129	100	3e-30
AXA93803.1	AFJ88051	70	510	96.7213	4e-144
AXA93804.1	AFJ88052	48	259	94.9045	1e-68
AXA93805.1	AFJ88053	75	92	86.8852	4e-19
AXA93807.1	AFJ88055	60	447	99.2366	3e-125
>>
14. CP002745
Source: Collimonas fungivorans Ter331 chromosome, complete genome.
Number of proteins with BLAST hits to this cluster: 12
MultiGeneBlast score: 12.5
Cumulative Blast bit score: 5495
Table of genes, locations, strands and annotations of subject cluster:
AEK60892	1241891	1241983	+	hypothetical_protein	CFU_1060
AEK60893	1241970	1242971	+	Fructose-1,6-bisphosphatase,_type_I	fbp
AEK60894	1243105	1243389	+	hypothetical_protein	CFU_1062
AEK60895	1243691	1244248	+	hypothetical_protein	CFU_1063
AEK60896	1244279	1245727	-	GGDEF_domain_protein	CFU_1064
AEK60897	1245805	1246284	+	conserved_hypothetical_protein	CFU_1065
AEK60898	1246281	1246685	-	putative_transcriptional_regulator	CFU_1066
AEK60899	1246691	1247989	+	NADH:flavin_oxidoreductase,_Old_Yellow_Enzyme family	noxB
AEK60900	1248005	1248865	-	Phenazine_biosynthesis_PhzC/PhzF_protein	CFU_1068
AEK60901	1248915	1249364	-	putative_transcriptional_regulator	CFU_1069
AEK60902	1249793	1252255	+	putative_vgr_related_protein	CFU_1070
AEK60903	1252267	1253328	+	hypothetical_protein	CFU_1071
AEK60904	1253350	1256262	+	hypothetical_protein	CFU_1072
AEK60905	1256275	1257525	+	hypothetical_protein	CFU_1073
AEK60906	1257548	1258789	+	hypothetical_protein	CFU_1074
AEK60907	1259532	1259810	+	PAAR_repeat_containing_protein	CFU_1075
AEK60908	1259982	1260779	-	putative_hydrolase	CFU_1076
AEK60909	1260803	1261000	+	hypothetical_protein	CFU_1077
AEK60910	1261275	1261460	-	Rubredoxin-type_Fe(Cys)4_protein	CFU_1078
AEK60911	1261453	1262406	-	delta_12_desaturase	CFU_1079
AEK60912	1262450	1263550	-	fatty_acid_desaturase	desA
AEK60913	1263565	1263897	-	phosphopantetheine-binding_protein	pksP
AEK60914	1263941	1264909	-	Delta-9_fatty_acid_desaturase	jamB2
AEK60915	1264925	1265872	-	Delta-9_fatty_acid_desaturase	jamB3
AEK60916	1265876	1267729	-	Long-chain-fatty-acid--CoA_ligase	CFU_1084
AEK60917	1267882	1269363	-	drug_transporter	CFU_1085
AEK60918	1270164	1271198	-	Rieske_(2Fe-2S)_domain_protein	vanA
AEK60919	1271295	1272377	-	fatty_acid_desaturase	CFU_1087
AEK60920	1272631	1274016	-	monooxygenase,_FAD-binding_protein	CFU_1088
AEK60921	1274170	1275462	-	3-oxoacyl-(acyl-carrier-protein)_synthase	CFU_1089
AEK60922	1276647	1276766	-	hypothetical_protein	CFU_1090
AEK60923	1277429	1278751	+	Major_facilitator_family_transporter	CFU_1091
AEK60924	1278993	1280366	-	hypothetical_protein	CFU_1092
AEK60925	1281561	1281656	+	hypothetical_protein	CFU_1093
AEK60926	1281653	1281781	+	hypothetical_protein	CFU_1094
AEK60927	1281778	1282068	+	Integrase,_catalytic_region	CFU_1095
AEK60928	1282701	1284191	-	Xylulose_kinase	xylB
AEK60929	1284268	1285677	-	D-arabinitol_4-dehydrogenase	dalD
AEK60930	1285726	1286868	-	Various_polyols_ABC_transporter,_ATP-binding component	CFU_1098
AEK60931	1286951	1287652	-	Phosphoglycolate_phosphatase	CFU_1099
AEK60932	1287649	1288464	-	Various_polyols_ABC_transporter,_permease component 2	CFU_1100
AEK60933	1288461	1289390	-	hypothetical_protein	smoF
AEK60934	1289565	1290983	-	ABC_sugar_transporter,_periplasmic_ligand binding protein	smoE
AEK60935	1291248	1292207	+	Transcriptional_regulator	smoC
AEK60936	1292300	1292596	-	hypothetical_protein	CFU_1104
Table of Blast hits (query gene, subject gene, %identity, blast score, %coverage, e-value):
AXA93797.1	AEK60919	70	526	100.279	8e-149
AXA93798.1	AEK60918	86	617	99.1018	3e-176
AXA93800.1	AEK60916	77	958	100.324	0
AXA94869.1	AEK60915	88	521	97	1e-147
AXA94869.1	AEK60914	40	232	90.6667	1e-60
AXA93801.1	AEK60914	89	614	98.773	1e-175
AXA93801.1	AEK60915	38	213	92.9448	9e-55
AXA93802.1	AEK60913	94	204	100.917	7e-53
AXA93803.1	AEK60912	88	689	100	0
AXA93804.1	AEK60911	82	490	93.3121	3e-138
AXA93804.1	AEK60908	35	103	67.8344	8e-22
AXA93805.1	AEK60910	86	114	100	1e-25
AXA93806.1	AEK60911	35	112	71.8033	2e-24
AXA93806.1	AEK60908	31	102	80.3279	2e-21
>>
15. CP047140
Source: Streptomyces sp. Tu 2975 chromosome, complete genome.
Number of proteins with BLAST hits to this cluster: 11
MultiGeneBlast score: 11.5
Cumulative Blast bit score: 2587
Table of genes, locations, strands and annotations of subject cluster:
QIP84204	2139269	2139634	+	nuclear_transport_factor_2_family_protein	GLX30_09400
QIP84205	2139904	2140464	-	TetR/AcrR_family_transcriptional_regulator	GLX30_09405
QIP84206	2140577	2141263	+	SDR_family_oxidoreductase	GLX30_09410
QIP84207	2141404	2142408	+	NADP-dependent_oxidoreductase	GLX30_09415
QIP84208	2142711	2143754	-	LacI_family_transcriptional_regulator	GLX30_09420
QIP84209	2143861	2144694	-	sugar_ABC_transporter_ATP-binding_protein	GLX30_09425
QIP84210	2144691	2145686	-	ABC_transporter_permease	GLX30_09430
QIP84211	2145864	2146877	-	sugar_ABC_transporter_substrate-binding_protein	GLX30_09435
QIP84212	2147177	2148148	+	carbohydrate_kinase	GLX30_09440
QIP84213	2148355	2150910	+	glycoside_hydrolase_family_32_protein	GLX30_09445
QIP84214	2151021	2151314	+	antibiotic_biosynthesis_monooxygenase	GLX30_09450
QIP84215	2152201	2152668	-	helix-turn-helix_transcriptional_regulator	GLX30_09455
QIP84216	2152756	2153919	-	thiolase_family_protein	GLX30_09460
QIP84217	2154013	2155446	-	DHA2_family_efflux_MFS_transporter_permease subunit	GLX30_09465
QIP84218	2155777	2157009	+	cytochrome_P450	GLX30_09470
QIP84219	2157112	2158005	+	alpha/beta_hydrolase	GLX30_09475
QIP84220	2158185	2158982	+	thioesterase_family_protein	GLX30_09480
GLX30_09485	2159032	2160806	+	fatty_acyl-AMP_ligase	no_locus_tag
QIP84221	2160803	2161774	+	acyl-CoA_desaturase	GLX30_09490
QIP84222	2161778	2162740	+	acyl-CoA_desaturase	GLX30_09495
QIP84223	2162787	2163077	+	acyl_carrier_protein	GLX30_09500
QIP84224	2163136	2164239	+	fatty_acid_desaturase	GLX30_09505
QIP84225	2164236	2165105	+	alpha/beta_hydrolase	GLX30_09510
QIP84226	2165102	2165284	+	rubredoxin	GLX30_09515
QIP84227	2165480	2166628	+	acetyl-CoA_C-acetyltransferase	GLX30_09520
QIP84228	2166736	2167368	+	hypothetical_protein	GLX30_09525
QIP84229	2167377	2167784	+	hypothetical_protein	GLX30_09530
QIP84230	2169180	2170535	+	cytochrome_P450	GLX30_09535
QIP84231	2170924	2171892	+	polyprenyl_synthetase_family_protein	GLX30_09540
QIP84232	2171967	2173028	+	hypothetical_protein	GLX30_09545
QIP84233	2173025	2173492	+	MFS_transporter	GLX30_09550
QIP84234	2173573	2174532	+	transglutaminase	GLX30_09555
QIP84235	2174529	2174777	+	acyl_carrier_protein	GLX30_09560
QIP84236	2174780	2176303	+	long-chain_fatty_acid--CoA_ligase	GLX30_09565
QIP84237	2176300	2177001	+	4'-phosphopantetheinyl_transferase_superfamily protein	GLX30_09570
QIP88451	2176992	2177402	-	PPOX_class_F420-dependent_oxidoreductase	GLX30_09575
QIP84238	2178285	2179613	-	class_I_SAM-dependent_RNA_methyltransferase	GLX30_09580
QIP84239	2179700	2181748	-	APC_family_permease	GLX30_09585
QIP84240	2181935	2182603	+	TrkA_family_potassium_uptake_protein	GLX30_09590
QIP84241	2182603	2183280	+	TrkA_family_potassium_uptake_protein	GLX30_09595
QIP84242	2183380	2184117	-	DUF3159_domain-containing_protein	GLX30_09600
QIP84243	2184121	2184546	-	OB-fold_nucleic_acid_binding_domain-containing protein	GLX30_09605
QIP84244	2184580	2185263	-	response_regulator	GLX30_09610
QIP84245	2185326	2187869	-	sensor_histidine_kinase_KdpD	GLX30_09615
Table of Blast hits (query gene, subject gene, %identity, blast score, %coverage, e-value):
AXA93800.1	GLX30_09485	44	171	33.7115	8e-42
AXA94869.1	QIP84221	61	341	93	2e-93
AXA94869.1	QIP84222	37	216	92.6667	8e-56
AXA93801.1	QIP84222	60	406	96.319	6e-113
AXA93801.1	QIP84221	38	207	86.1963	6e-53
AXA93802.1	QIP84223	51	94	88.0734	1e-19
AXA93803.1	QIP84224	65	511	98.3607	3e-144
AXA93804.1	QIP84225	45	213	86.3057	9e-55
AXA93805.1	QIP84226	56	73	86.8852	3e-13
AXA93806.1	QIP84225	31	76	66.2295	1e-13
AXA93807.1	QIP84227	47	279	96.1832	1e-74
>>
16. CP013232
Source: Collimonas fungivorans strain Ter6 chromosome, complete genome.
Number of proteins with BLAST hits to this cluster: 11
MultiGeneBlast score: 11.0
Cumulative Blast bit score: 4751
Table of genes, locations, strands and annotations of subject cluster:
AMO92751	21976	22359	-	pentapeptide_repeats_family_protein	CFter6_0020
AMO92752	22407	22589	+	hypothetical_protein	CFter6_0021
AMO92753	22586	22753	+	hypothetical_protein	CFter6_0022
AMO92754	22829	23275	+	helix-turn-helix_family_protein	CFter6_0023
AMO92755	23878	24468	-	putative_membrane_protein	CFter6_0024
AMO92756	24492	25256	-	hypothetical_protein	CFter6_0025
AMO92757	25419	26030	-	glutathione_S-transferase,_C-terminal_domain protein	CFter6_0026
AMO92758	26146	26826	-	SMP-30/Gluconolaconase/LRE-like_region_family protein	CFter6_0027
AMO92759	26884	28110	-	putative_tetratricopeptide_TPR_4	CFter6_0028
AMO92760	28170	28814	-	thiopurine_S-methyltransferase,_Se/Te detoxification family	tmpT
AMO92761	29225	29395	+	helix-turn-helix_domain_protein	CFter6_0030
AMO92762	29463	32456	-	ricin-type_beta-trefoil_lectin_domain-like family protein	CFter6_0031
AMO92763	33106	34068	-	sel1_repeat_family_protein	CFter6_0032
AMO92764	34158	36164	-	phospholipase_D_family_protein	CFter6_0033
AMO92765	36260	36874	-	hypothetical_protein	CFter6_0034
AMO92766	36944	39601	-	rhs_element_Vgr_family_protein	CFter6_0035
AMO92767	39611	39736	+	hypothetical_protein	CFter6_0036
AMO92768	40358	41395	+	bacterial_regulatory_helix-turn-helix_s,_AraC family protein	CFter6_0037
AMO92769	41438	42235	-	alpha/beta_hydrolase_fold_family_protein	CFter6_0038
AMO92770	42293	43315	-	rieske_[2Fe-2S]_domain_protein	CFter6_0039
AMO92771	43476	43661	-	rubredoxin	rubA
AMO92772	43654	44607	-	alpha/beta_hydrolase_fold_family_protein	CFter6_0041
AMO92773	44651	45751	-	fatty_acid_desaturase_family_protein	CFter6_0042
AMO92774	45766	46098	-	phosphopantetheine_attachment_site_family protein	CFter6_0043
AMO92775	46142	47110	-	fatty_acid_desaturase_family_protein	CFter6_0044
AMO92776	47126	48073	-	fatty_acid_desaturase_family_protein	CFter6_0045
AMO92777	48077	49957	-	AMP-binding_enzyme_family_protein	CFter6_0046
AMO92778	50075	50254	-	hypothetical_protein	CFter6_0047
AMO92779	50303	50935	-	ABC_transporter_family_protein	CFter6_0048
AMO92780	51178	51456	+	hypothetical_protein	CFter6_0049
AMO92781	51504	53135	+	PA_domain_protein	CFter6_0050
AMO92782	53174	54925	+	hep_Hag_family_protein	CFter6_0052
AMO92783	54926	57400	-	phospholipase_C,_phosphocholine-specific	CFter6_0051
AMO92784	57618	58655	-	isocitrate/isopropylmalate_dehydrogenase_family protein	CFter6_0053
AMO92785	58875	60470	-	alkyl_hydroperoxide_reductase_subunit_F	ahpF
AMO92786	60559	61122	-	peroxiredoxin	ahpC
AMO92787	61281	61397	-	hypothetical_protein	CFter6_0056
AMO92788	61567	63672	+	calcineurin-like_phosphoesterase_family_protein	CFter6_0057
AMO92789	63669	64421	+	sel1_repeat_family_protein	CFter6_0058
AMO92790	64671	65486	+	creatinine_amidohydrolase_family_protein	CFter6_0059
AMO92791	65542	66735	+	lactonase,_7-bladed_beta-propeller_family protein	CFter6_0060
AMO92792	66766	67848	-	hypothetical_protein	CFter6_0061
AMO92793	67987	68100	-	hypothetical_protein	CFter6_0062
AMO92794	68118	68834	+	alpha/beta_hydrolase_family_protein	CFter6_0063
AMO92795	68932	69726	+	short_chain_dehydrogenase_family_protein	CFter6_0064
AMO92796	69739	70344	-	glutathione_S-transferase,_C-terminal_domain protein	CFter6_0065
Table of Blast hits (query gene, subject gene, %identity, blast score, %coverage, e-value):
AXA93798.1	AMO92770	47	341	96.4072	3e-93
AXA93800.1	AMO92777	78	972	101.459	0
AXA94869.1	AMO92776	88	543	97	2e-154
AXA94869.1	AMO92775	39	231	93.3333	2e-60
AXA93801.1	AMO92775	89	612	98.773	5e-175
AXA93801.1	AMO92776	39	234	90.4908	3e-61
AXA93802.1	AMO92774	94	204	100.917	7e-53
AXA93803.1	AMO92773	89	693	100	0
AXA93804.1	AMO92772	82	487	93.3121	2e-137
AXA93804.1	AMO92769	35	105	67.8344	3e-22
AXA93805.1	AMO92771	86	114	100	1e-25
AXA93806.1	AMO92772	35	112	71.8033	2e-24
AXA93806.1	AMO92769	33	103	74.0984	6e-22
>>
17. CP051006
Source: Streptomyces griseofuscus strain DSM 40191 chromosome, complete genome.
Number of proteins with BLAST hits to this cluster: 10
MultiGeneBlast score: 10.5
Cumulative Blast bit score: 2544
Table of genes, locations, strands and annotations of subject cluster:
QNT98036	8648100	8648519	-	hypothetical_protein	HEP81_07806
QNT98037	8648586	8649167	-	Polyketide_cyclase_/_dehydrase_and_lipid transport	HEP81_07807
QNT98038	8649246	8650601	-	carotenoid_cleavage_dioxygenase	HEP81_07808
QNT98039	8650653	8651093	-	Polyketide_cyclase_/_dehydrase_and_lipid transport	HEP81_07809
QNT98040	8651144	8652592	-	DHA2_family_efflux_MFS_transporter_permease subunit	HEP81_07810
QNT98041	8652693	8653259	-	TetR_family_transcriptional_regulator	HEP81_07811
QNT98042	8653491	8654393	-	hypothetical_protein	HEP81_07812
QNT98043	8654339	8655490	-	hypothetical_protein	HEP81_07813
QNT98044	8655675	8655944	+	hypothetical_protein	HEP81_07814
QNT98045	8656305	8657327	+	IS701-like_element_ISSav2_family_transposase	HEP81_07815
QNT98046	8657439	8658032	+	hypothetical_protein	HEP81_07816
QNT98047	8658085	8658204	+	hypothetical_protein	HEP81_07817
QNT98048	8658861	8659304	-	ketosteroid_isomerase-related_protein	HEP81_07818
QNT98049	8659406	8660041	+	TetR_family_transcriptional_regulator	HEP81_07819
QNT98050	8660236	8661399	+	alkaline_phosphatase	HEP81_07820
QNT98051	8661478	8662260	+	hypothetical_protein	HEP81_07821
QNT98052	8663007	8663222	-	hypothetical_protein	HEP81_07822
QNT98053	8663219	8664433	-	IS110_transposase	HEP81_07823
QNT98054	8665214	8665375	+	hypothetical_protein	HEP81_07824
QNT98055	8665603	8666484	-	GNAT_family_N-acetyltransferase	HEP81_07825
QNT98056	8666460	8667335	-	hypothetical_protein	HEP81_07826
QNT98057	8667964	8668146	-	rubredoxin	HEP81_07827
QNT98058	8668143	8669042	-	hypothetical_protein	HEP81_07828
QNT98059	8669039	8670142	-	Delta(12)-fatty-acid_desaturase	desA_2
QNT98060	8670165	8670446	-	polyketide_synthase	HEP81_07830
QNT98061	8670518	8671459	-	fatty_acid_desaturase_(membrane)	HEP81_07831
QNT98062	8671462	8672607	-	Fatty_acid_desaturase	HEP81_07832
QNT98063	8672604	8674505	-	fatty_acyl-AMP_ligase	HEP81_07833
QNT98064	8675102	8675896	-	thioesterase_family_protein	HEP81_07834
QNT98065	8676002	8676892	-	epoxide_hydrolase	HEP81_07835
QNT98066	8677172	8678404	-	cytochrome_P450	HEP81_07836
QNT98067	8679080	8680555	-	major_facilitator_superfamily_transporter	HEP81_07837
QNT98068	8681232	8682401	-	Inner_membrane_transport_protein_YnfM	ynfM_2
QNT98069	8682802	8683722	+	DNA-binding_protein	HEP81_07839
QNT98070	8683668	8684417	+	hypothetical_protein	HEP81_07840
QNT98071	8684606	8685724	+	oxidoreductase	HEP81_07841
QNT98072	8685879	8686673	-	SDR_family_oxidoreductase	HEP81_07842
QNT98073	8686888	8687214	-	hypothetical_protein	HEP81_07843
QNT98074	8687366	8687791	-	hypothetical_protein	HEP81_07844
QNT98075	8688551	8690113	-	FAD-dependent_oxidoreductase	HEP81_07846
QNT98076	8690346	8690594	-	hypothetical_protein	HEP81_07848
QNT98077	8690930	8691685	-	MarR_family_transcriptional_regulator	HEP81_07849
QNT98078	8691911	8692573	+	hypothetical_protein	HEP81_07850
QNT98079	8692837	8693028	-	hypothetical_protein	HEP81_07851
QNT98080	8693198	8694322	-	helix-turn-helix_domain-containing_protein	HEP81_07852
QNT98081	8694460	8695383	+	NADP-dependent_oxidoreductase	HEP81_07853
Table of Blast hits (query gene, subject gene, %identity, blast score, %coverage, e-value):
AXA93800.1	QNT98063	45	507	94.6515	5e-143
AXA94869.1	QNT98062	60	331	95.3333	2e-90
AXA94869.1	QNT98061	39	200	94	5e-51
AXA93801.1	QNT98061	61	380	92.9448	4e-105
AXA93801.1	QNT98062	39	186	82.8221	9e-47
AXA93802.1	QNT98060	62	103	74.3119	2e-22
AXA93803.1	QNT98059	63	489	97.541	8e-138
AXA93804.1	QNT98058	45	209	87.5796	2e-53
AXA93805.1	QNT98057	54	72	86.8852	4e-13
AXA93806.1	QNT98058	31	67	61.9672	6e-11
>>
18. CP013448
Source: Burkholderia sp. Bp7605 strain MSMB0175 chromosome 1, complete sequence.
Number of proteins with BLAST hits to this cluster: 10
MultiGeneBlast score: 10.0
Cumulative Blast bit score: 3182
Table of genes, locations, strands and annotations of subject cluster:
AOK29987	2662249	2663280	-	inositol_2-dehydrogenase	AQ611_11700
AOK31046	2663273	2664154	-	RpiR_family_transcriptional_regulator	AQ611_11705
AOK29988	2664359	2665402	+	sugar_ABC_transporter_substrate-binding_protein	AQ611_11710
AOK29989	2665531	2666676	+	ATPase	AQ611_11715
AOK29990	2666715	2667515	+	ABC_transporter_ATP-binding_protein	AQ611_11720
AOK29991	2667531	2669528	+	5-dehydro-2-deoxygluconokinase	AQ611_11725
AOK29992	2669591	2671585	+	3D-(3,5/4)-trihydroxycyclohexane-1,2-dione acylhydrolase (decyclizing)	AQ611_11730
AOK29993	2671582	2672502	+	myo-inosose-2_dehydratase	AQ611_11735
AOK29994	2672502	2673302	+	5-deoxy-glucuronate_isomerase	AQ611_11740
AOK29995	2673462	2673911	-	thioesterase	AQ611_11745
AOK29996	2674011	2675159	-	4-hydroxybutyrate_dehydrogenase	AQ611_11750
AOK29997	2675432	2675767	+	hypothetical_protein	AQ611_11755
AOK29998	2675937	2676473	-	ADP-ribose_pyrophosphatase	AQ611_11760
AOK29999	2677030	2677224	-	hypothetical_protein	AQ611_11765
AOK30000	2677882	2678370	+	cupin	AQ611_11770
AOK30001	2678389	2679309	-	hypothetical_protein	AQ611_11775
AOK30002	2679571	2681217	+	hypothetical_protein	AQ611_11780
AOK30003	2681321	2682334	-	(2Fe-2S)-binding_protein	AQ611_11785
AOK30004	2682394	2682558	-	rubredoxin	AQ611_11790
AOK30005	2682576	2683493	-	delta-12-desaturase	AQ611_11795
AOK30006	2683490	2684608	-	fatty_acid_desaturase	AQ611_11800
AOK30007	2684622	2684942	-	polyketide_synthase	AQ611_11805
AOK30008	2685007	2686005	-	fatty_acid_desaturase	AQ611_11810
AOK30009	2686058	2687020	-	fatty_acid_desaturase	AQ611_11815
AOK30010	2687079	2688890	-	AMP-dependent_synthetase	AQ611_11820
AOK31047	2689215	2690486	-	MFS_transporter	AQ611_11825
AOK30011	2690681	2691628	+	LysR_family_transcriptional_regulator	AQ611_11830
AOK31048	2692025	2694649	-	alanine--tRNA_ligase	AQ611_11835
AOK30012	2695677	2696798	+	hypothetical_protein	AQ611_11840
AOK30013	2697214	2698614	-	hypothetical_protein	AQ611_11845
AOK30014	2699305	2700525	+	CoA-transferase	AQ611_11850
AOK30015	2700619	2701428	+	hypothetical_protein	AQ611_11855
AOK31049	2701852	2702067	-	ornithine_acetyltransferase	AQ611_11860
AOK30016	2702318	2704027	+	glutaminyl-tRNA_synthetase	AQ611_11865
AOK30017	2704195	2704662	-	NUDIX_hydrolase	AQ611_11870
AOK31050	2704676	2705062	-	hypothetical_protein	AQ611_11875
AOK30018	2705329	2706717	-	cytochrome-c_peroxidase	AQ611_11880
AOK30019	2706963	2708540	+	acid_phosphatase	AQ611_11885
AOK30020	2708634	2709266	-	LuxR_family_transcriptional_regulator	AQ611_11890
Table of Blast hits (query gene, subject gene, %identity, blast score, %coverage, e-value):
AXA93798.1	AOK30003	51	376	97.6048	8e-104
AXA93800.1	AOK30010	54	592	93.8412	2e-168
AXA94869.1	AOK30009	61	335	96	1e-91
AXA94869.1	AOK30008	40	222	98	1e-57
AXA93801.1	AOK30008	72	466	92.3313	8e-131
AXA93801.1	AOK30009	40	202	86.1963	2e-51
AXA93802.1	AOK30007	67	131	89.9083	8e-31
AXA93803.1	AOK30006	70	504	94.5355	3e-142
AXA93804.1	AOK30005	55	263	89.172	8e-70
AXA93805.1	AOK30004	75	92	86.8852	4e-19
>>
19. CP013459
Source: Burkholderia stagnalis strain MSMB735WGS chromosome 1, complete sequence.
Number of proteins with BLAST hits to this cluster: 10
MultiGeneBlast score: 10.0
Cumulative Blast bit score: 3006
Table of genes, locations, strands and annotations of subject cluster:
AOK53481	2853367	2854494	-	integrase	WT74_12690
AOK53482	2854970	2855257	+	hypothetical_protein	WT74_12700
AOK53483	2855286	2855552	+	transposase	WT74_12705
AOK53484	2855573	2856373	+	integrase	WT74_12710
WT74_12715	2856415	2856537	+	transposase	no_locus_tag
AOK54429	2856900	2857403	+	integrase	WT74_12720
AOK53485	2857400	2857687	-	hypothetical_protein	WT74_12725
AOK53486	2858265	2858447	+	hypothetical_protein	WT74_12730
AOK53487	2859065	2859790	-	hypothetical_protein	WT74_12735
AOK53488	2860101	2860940	-	hypothetical_protein	WT74_12740
AOK53489	2861093	2861668	+	DNA_invertase	WT74_12745
AOK53490	2862256	2862486	-	hypothetical_protein	WT74_12750
AOK53491	2864688	2865188	-	ecotin	WT74_12755
AOK53492	2865328	2865774	+	hypothetical_protein	WT74_12760
AOK54430	2865942	2866328	-	hypothetical_protein	WT74_12765
AOK53493	2866492	2866872	+	hypothetical_protein	WT74_12770
AOK53494	2867039	2868406	+	multidrug_MFS_transporter	WT74_12775
AOK53495	2868434	2869030	-	ATPase	WT74_12780
AOK53496	2869023	2870441	-	trehalose-6-phosphate_synthase	WT74_12785
AOK53497	2870584	2870781	-	hypothetical_protein	WT74_12790
AOK53498	2871068	2871619	+	hypothetical_protein	WT74_12795
AOK53499	2871616	2872110	+	hypothetical_protein	WT74_12800
AOK53500	2872391	2872576	-	rubredoxin	WT74_12805
AOK53501	2872573	2873493	-	delta-12-desaturase	WT74_12810
AOK53502	2873493	2874599	-	fatty_acid_desaturase	WT74_12815
AOK53503	2874613	2874933	-	polyketide_synthase	WT74_12820
AOK53504	2874985	2875968	-	fatty_acid_desaturase	WT74_12825
AOK53505	2875996	2876955	-	fatty_acid_desaturase	WT74_12830
AOK53506	2877013	2878800	-	AMP-dependent_synthetase	WT74_12835
AOK53507	2879260	2879901	-	hypothetical_protein	WT74_12840
AOK53508	2881054	2881506	+	hypothetical_protein	WT74_12845
AOK54431	2883999	2884526	+	helix-turn-helix_transcriptional_regulator	WT74_12850
AOK53509	2884972	2886312	-	nitrate_ABC_transporter_ATP-binding_protein	WT74_12855
AOK53510	2886335	2888092	-	sulfonate_ABC_transporter_permease	WT74_12860
AOK53511	2888581	2888847	+	hypothetical_protein	WT74_12865
AOK53512	2888891	2890204	-	histidine_kinase	WT74_12870
AOK53513	2890188	2890913	-	two-component_system_response_regulator	ompR
AOK53514	2891138	2891689	+	hypothetical_protein	WT74_12880
AOK53515	2891831	2892529	-	quercetin_2,3-dioxygenase	WT74_12885
AOK54432	2892911	2893687	+	ABC_transporter_substrate-binding_protein	WT74_12890
AOK53516	2893868	2894557	+	histidine_ABC_transporter_permease	WT74_12895
AOK53517	2894554	2895267	+	amino_acid_ABC_transporter_permease	WT74_12900
AOK53518	2895286	2896065	+	amino_acid_transporter	WT74_12905
AOK53519	2896125	2896637	-	GCN5_family_acetyltransferase	WT74_12910
AOK53520	2896838	2897764	+	LysR_family_transcriptional_regulator	WT74_12915
AOK54433	2898286	2899368	+	porin	WT74_12920
AOK53521	2899490	2899828	-	transcriptional_regulator	WT74_12925
AOK54434	2899894	2901594	-	NAD_synthetase	WT74_12930
Table of Blast hits (query gene, subject gene, %identity, blast score, %coverage, e-value):
AXA93798.1	AOK53507	35	138	58.0838	4e-32
AXA93800.1	AOK53506	53	592	93.8412	2e-168
AXA94869.1	AOK53505	57	337	99.6667	5e-92
AXA94869.1	AOK53504	40	224	97	5e-58
AXA93801.1	AOK53504	69	479	99.6933	8e-135
AXA93801.1	AOK53505	38	194	94.4785	5e-49
AXA93802.1	AOK53503	66	135	100	5e-32
AXA93803.1	AOK53502	71	553	97.2678	5e-157
AXA93804.1	AOK53501	50	257	98.4076	5e-68
AXA93805.1	AOK53500	68	97	100	1e-20
>>
20. AP014522
Source: Pseudomonas protegens Cab57 DNA, complete genome.
Number of proteins with BLAST hits to this cluster: 10
MultiGeneBlast score: 10.0
Cumulative Blast bit score: 2702
Table of genes, locations, strands and annotations of subject cluster:
BAO59604	286984	287649	-	amino_acid_ABC_transporter_permease	PPC_0257
BAO59605	287649	288446	-	cystine_transporter_subunit	PPC_0258
BAO59606	288892	289887	-	D-cysteine_desulfhydrase	PPC_0259
BAO59607	290077	291003	+	serine_O-acetyltransferase	PPC_0260
BAO59608	291351	293351	+	high-affinity_choline_transporter_BetT	betT
BAO59609	293361	293618	-	hypothetical_protein	PPC_0262
BAO59610	293671	294411	-	short_chain_dehydrogenase/reductase_family oxidoreductase	PPC_0263
BAO59611	294543	295433	+	LysR_family_transcriptional_regulator	PPC_0264
BAO59612	295651	295833	+	periplasmic_or_secreted_lipoprotein	PPC_0265
BAO59613	295830	296264	+	protein_of_unknown_function,_UPF0150_family	PPC_0266
BAO59614	296277	297323	-	LacI_family_transcription_regulator	PPC_0267
BAO59615	297529	299787	+	TonB-dependent_receptor	PPC_0268
BAO59616	299931	301259	+	FMN-dependent_oxidoreductase,_nitrilotriacetate monooxygenase family	PPC_0269
BAO59617	301334	302371	+	aldo/keto_reductase_family_oxidoreductase	PPC_0270
BAO59618	302467	303654	-	membrane_fusion_protein_family_auxiliary transport protein	PPC_0271
BAO59619	303819	305327	+	EmrB/QacA_family_drug_resistance_transporter	PPC_0272
BAO59620	305342	306394	-	AraC_family_transcriptional_regulator	PPC_0273
BAO59621	306679	308541	+	AMP-binding_protein	PPC_0274
BAO59622	308538	309446	+	fatty_acid_desaturase	PPC_0275
BAO59623	309478	310434	+	fatty_acid_desaturase	PPC_0276
BAO59624	310487	310807	+	phosphopantetheine_attachment_site domain-containing protein	PPC_0277
BAO59625	310826	312805	+	fatty_acid_desaturase	PPC_0278
BAO59626	312843	313040	+	rubredoxin	PPC_0279
BAO59627	313243	314004	+	hypothetical_protein	PPC_0280
BAO59628	314001	315455	+	dihydrolipoamide_dehydrogenase	lpdA_2
BAO59629	315515	316354	-	taurine_dioxygenase	tauD
BAO59630	316608	317447	-	taurine_ABC_transporter_permease	tauC
BAO59631	317444	318238	-	taurine_transporter_ATP-binding_subunit	tauB
BAO59632	318266	319243	-	taurine_ABC_transporter,_periplasmic_binding protein	PPC_0285
BAO59633	319417	321000	-	glutamate--cysteine_ligase	PPC_0286
BAO59634	321216	321599	-	thioesterase_family_protein	PPC_0287
BAO59635	321599	323923	-	S1_RNA-binding_domain-containing_protein	PPC_0288
BAO59636	324283	325023	+	osmolarity_response_regulator	ompR
BAO59637	325129	326442	+	osmolarity_sensor_protein_EnvZ	PPC_0290
BAO59638	326518	327423	-	alpha-L-glutamate_ligase	PPC_0291
BAO59639	327420	327902	-	ribosomal_protein_S6_modification_protein	PPC_0292
BAO59640	327919	328698	-	EAL_domain-containing_protein	PPC_0293
BAO59641	328814	329218	+	heat_shock_protein_15	PPC_0294
BAO59642	329257	330069	-	membrane_protein	PPC_0295
BAO59643	330168	331070	+	Hsp33-like_chaperonin	hslO
BAO59644	331250	332794	+	phosphoenolpyruvate_carboxykinase	PPC_0297
BAO59645	332910	333776	-	membrane_protein,_DUF6_family	PPC_0298
BAO59646	333805	334158	-	hypothetical_protein	PPC_0299
Table of Blast hits (query gene, subject gene, %identity, blast score, %coverage, e-value):
AXA93800.1	BAO59621	45	480	91.7342	9e-135
AXA94869.1	BAO59622	53	311	96	2e-84
AXA94869.1	BAO59623	42	223	91	6e-58
AXA93801.1	BAO59623	62	399	92.0245	1e-110
AXA93801.1	BAO59622	38	215	86.1963	2e-55
AXA93802.1	BAO59624	62	110	71.5596	2e-24
AXA93803.1	BAO59625	57	452	98.0874	1e-126
AXA93804.1	BAO59625	46	216	84.3949	1e-55
AXA93804.1	BAO59627	31	111	74.5223	4e-24
AXA93805.1	BAO59626	59	80	96.7213	2e-15
AXA93806.1	BAO59627	31	105	68.1967	2e-22
>>
21. CP031396
Source: Pseudomonas protegens strain FD6 chromosome, complete genome.
Number of proteins with BLAST hits to this cluster: 10
MultiGeneBlast score: 10.0
Cumulative Blast bit score: 2583
Table of genes, locations, strands and annotations of subject cluster:
AXK55027	3812237	3813046	-	MetQ/NlpA_family_ABC_transporter substrate-binding protein	DWF74_17235
AXK55028	3813257	3814624	-	FMN-dependent_monooxygenase	DWF74_17240
AXK55029	3814624	3815823	-	SfnB_family_sulfur_acquisition_oxidoreductase	DWF74_17245
AXK55030	3815863	3817104	-	SfnB_family_sulfur_acquisition_oxidoreductase	DWF74_17250
AXK55031	3817478	3817864	-	DUF2750_domain-containing_protein	DWF74_17255
AXK55032	3817920	3818672	-	L-cystine_ABC_transporter_ATP-binding_protein YecC	DWF74_17260
AXK55033	3818677	3819342	-	cystine_ABC_transporter_permease	DWF74_17265
AXK55034	3819342	3820139	-	cystine_ABC_transporter_substrate-binding protein	DWF74_17270
AXK55035	3820458	3821453	-	D-cysteine_desulfhydrase	DWF74_17275
AXK55036	3821643	3822569	+	serine_acetyltransferase	DWF74_17280
AXK55037	3823019	3825019	+	BCCT_family_transporter	DWF74_17285
AXK55038	3825029	3825286	-	hypothetical_protein	DWF74_17290
DWF74_17295	3825461	3825565	+	LysR_family_transcriptional_regulator	no_locus_tag
DWF74_17300	3825613	3826647	+	LLM_class_flavin-dependent_oxidoreductase	no_locus_tag
AXK55039	3826683	3827720	+	L-glyceraldehyde_3-phosphate_reductase	DWF74_17305
AXK55040	3827826	3829025	-	HlyD_family_secretion_protein	DWF74_17310
AXK55041	3829103	3830698	+	MFS_transporter	DWF74_17315
AXK55042	3830718	3831791	-	helix-turn-helix_domain-containing_protein	DWF74_17320
AXK55043	3832057	3833928	+	AMP-binding_protein	DWF74_17325
AXK55044	3833925	3834833	+	acyl-CoA_desaturase	DWF74_17330
AXK55045	3834865	3835821	+	acyl-CoA_desaturase	DWF74_17335
AXK55046	3835873	3836193	+	polyketide_synthase	DWF74_17340
AXK55047	3836212	3838191	+	alpha/beta_fold_hydrolase	DWF74_17345
AXK55048	3838229	3838426	+	rubredoxin	DWF74_17350
AXK57567	3838523	3839389	+	alpha/beta_fold_hydrolase	DWF74_17355
AXK55049	3839386	3840840	+	dihydrolipoyl_dehydrogenase	lpdA
AXK55050	3840901	3841740	-	taurine_dioxygenase	DWF74_17365
AXK55051	3842003	3842842	-	taurine_ABC_transporter_permease_TauC	DWF74_17370
AXK55052	3842839	3843633	-	taurine_ABC_transporter_ATP-binding_subunit	DWF74_17375
AXK55053	3843661	3844638	-	taurine_ABC_transporter_substrate-binding protein	tauA
AXK55054	3844918	3846501	-	glutamate--cysteine_ligase	DWF74_17385
AXK55055	3846717	3847100	-	PaaI_family_thioesterase	DWF74_17390
AXK55056	3847100	3849424	-	RNA-binding_transcriptional_accessory_protein	DWF74_17395
AXK55057	3849787	3850527	+	two-component_system_response_regulator_OmpR	DWF74_17400
AXK55058	3850633	3851946	+	HAMP_domain-containing_protein	DWF74_17405
AXK55059	3852076	3852981	-	30S_ribosomal_protein_S6--L-glutamate_ligase	DWF74_17410
AXK55060	3852978	3853460	-	ATP-dependent_zinc_protease	DWF74_17415
AXK55061	3853478	3854257	-	EAL_domain-containing_protein	DWF74_17420
AXK55062	3854373	3854777	+	RNA-binding_protein	DWF74_17425
AXK55063	3854854	3855666	-	phosphatase_PAP2_family_protein	DWF74_17430
AXK55064	3855766	3856668	+	Hsp33_family_molecular_chaperone_HslO	DWF74_17435
AXK55065	3856848	3858392	+	phosphoenolpyruvate_carboxykinase	DWF74_17440
Table of Blast hits (query gene, subject gene, %identity, blast score, %coverage, e-value):
AXA93800.1	AXK55043	45	488	92.3825	3e-137
AXA94869.1	AXK55044	53	307	92.3333	4e-83
AXA94869.1	AXK55045	41	221	91	2e-57
AXA93801.1	AXK55045	63	406	92.0245	7e-113
AXA93801.1	AXK55044	38	215	81.9018	2e-55
AXA93802.1	AXK55046	64	111	71.5596	6e-25
AXA93803.1	AXK55047	58	454	96.9945	2e-127
AXA93804.1	AXK55047	46	214	84.3949	5e-55
AXA93805.1	AXK55048	55	77	96.7213	2e-14
AXA93806.1	AXK55047	32	90	66.8852	8e-18
>>
22. CP007142
Source: Gynuella sunshinyii YC6258, complete genome.
Number of proteins with BLAST hits to this cluster: 10
MultiGeneBlast score: 10.0
Cumulative Blast bit score: 2241
Table of genes, locations, strands and annotations of subject cluster:
AJQ96766	5078728	5079477	-	ABC-type_transport_system_involved_in_Fe-S cluster assembly, ATPase component	YC6258_04734
AJQ96767	5079501	5080937	-	ABC-type_transport_system_involved_in_Fe-S cluster assembly, permease component	YC6258_04735
AJQ96768	5080955	5082124	-	cysteine_sulfinate_desulfinase/cysteine desulfurase-related enzyme	YC6258_04736
AJQ96769	5082154	5082639	-	putative_transcriptional_regulator	YC6258_04737
AJQ96770	5082811	5082927	+	hypothetical_Protein	YC6258_04738
AJQ96771	5083030	5084466	+	putative_acyltransferase	YC6258_04739
AJQ96772	5085038	5085757	+	putative_secreted_protein	YC6258_04740
AJQ96773	5085768	5086175	-	lactoylglutathione_lyase_and_related_lyase	YC6258_04741
AJQ96774	5086324	5086941	+	putative_transcriptional_regulator	YC6258_04742
AJQ96775	5087001	5088098	-	flagellar_basal-body_P-ring_protein	YC6258_04743
AJQ96776	5088109	5088834	-	flagellar_basal_body_L-ring_protein	YC6258_04744
AJQ96777	5088846	5089631	-	flagellar_basal_body_rod_protein	YC6258_04745
AJQ96778	5089689	5090441	-	flagellar_basal_body_rod_protein	YC6258_04746
AJQ96779	5090564	5090827	+	hypothetical_Protein	YC6258_04747
AJQ96780	5090830	5094486	-	flagellar_hook_protein_FlgE	YC6258_04748
AJQ96781	5094600	5095352	-	flagellar_hook_capping_protein	YC6258_04749
AJQ96782	5095365	5095805	-	flagellar_basal_body_rod_protein	YC6258_04750
AJQ96783	5095808	5096206	-	flagellar_basal_body_protein	YC6258_04751
AJQ96784	5096316	5096471	+	hypothetical_Protein	YC6258_04752
AJQ96785	5096695	5096826	-	hypothetical_Protein	YC6258_04753
AJQ96786	5097502	5099331	+	acyl-CoA_synthetase_(AMP-forming)/AMP-acid ligase II	YC6258_04754
AJQ96787	5099353	5101200	+	fatty-acid_desaturase	YC6258_04755
AJQ96788	5101327	5101647	+	hypothetical_Protein	YC6258_04756
AJQ96789	5101667	5103682	+	fatty_acid_desaturase	YC6258_04757
AJQ96790	5103679	5103870	+	rubredoxin	YC6258_04758
AJQ96791	5104022	5104480	+	transcriptional_regulator	YC6258_04759
AJQ96792	5104579	5107758	+	putative_exporter_of_the_RND_superfamily	YC6258_04760
AJQ96793	5107748	5109052	+	hypothetical_Protein	YC6258_04761
AJQ96794	5109155	5110027	+	lysophospholipase	YC6258_04762
AJQ96795	5110122	5110949	-	methylase_of_chemotaxis_methyl-accepting protein	YC6258_04763
AJQ96796	5110958	5111911	-	chemotaxis_signal_transduction_protein	YC6258_04764
AJQ96797	5112027	5112761	+	flagellar_basal_body_P-ring_biosynthesis protein	YC6258_04765
AJQ96798	5112885	5113187	+	negative_regulator_of_flagellin_synthesis (anti-sigma28 factor)	YC6258_04766
AJQ96799	5113244	5113729	+	flagellar_biosynthesis/type_III_secretory pathway chaperone	YC6258_04767
AJQ96800	5113740	5115182	+	chromosome_segregation_ATPase	YC6258_04768
AJQ96801	5115350	5116282	+	thiamine_monophosphate_kinase	YC6258_04769
AJQ96802	5116301	5116780	+	phosphatidylglycerophosphatase_A-related protein	YC6258_04770
AJQ96803	5116846	5117802	-	homocysteine/selenocysteine_methylase (S-methylmethionine-dependent)	YC6258_04771
AJQ96804	5117802	5119154	-	amino_acid_transporter	YC6258_04772
AJQ96805	5119394	5119549	-	hypothetical_Protein	YC6258_04773
AJQ96806	5119641	5119778	-	hypothetical_Protein	YC6258_04774
AJQ96807	5120500	5122371	+	methyl-accepting_chemotaxis_protein	YC6258_04775
AJQ96808	5122662	5123702	+	transcriptional_regulator	YC6258_04776
AJQ96809	5123699	5125048	+	ABC-type_sugar_transport_system,_periplasmic component	YC6258_04777
AJQ96810	5125160	5126026	+	ABC-type_sugar_transport_system,_permease component	YC6258_04778
AJQ96811	5126031	5126996	+	ABC-type_sugar_transport_system,_permease component	YC6258_04779
AJQ96812	5127007	5128119	+	ABC-type_sugar_transport_system,_ATPase component	YC6258_04780
AJQ96813	5128116	5129912	+	glycogen_debranching_enzyme	YC6258_04781
Table of Blast hits (query gene, subject gene, %identity, blast score, %coverage, e-value):
AXA93800.1	AJQ96786	44	493	92.2204	1e-138
AXA94869.1	AJQ96787	56	332	97.6667	9e-91
AXA93801.1	AJQ96787	61	393	96.0123	5e-109
AXA93802.1	AJQ96788	60	110	77.0642	2e-24
AXA93803.1	AJQ96789	58	460	94.8087	4e-129
AXA93804.1	AJQ96789	41	196	88.8535	1e-49
AXA93804.1	AJQ96794	31	85	67.1975	2e-16
AXA93805.1	AJQ96790	66	82	86.8852	5e-16
AXA93806.1	AJQ96789	32	90	71.1475	1e-17
>>
23. CP023522
Source: Burkholderia gladioli pv. gladioli strain FDAARGOS_389 chromosome 1, complete sequence.
Number of proteins with BLAST hits to this cluster: 9
MultiGeneBlast score: 9.5
Cumulative Blast bit score: 2798
Table of genes, locations, strands and annotations of subject cluster:
ATF84280	838007	839005	+	succinylglutamate_desuccinylase	CO712_03880
ATF84281	839640	840650	+	cystathionine_beta-synthase	CO712_03885
ATF84282	840647	842053	+	homocitrate_synthase	CO712_03890
ATF84283	842059	843108	+	hypothetical_protein	CO712_03895
CO712_03900	843163	844317	+	hypothetical_protein	no_locus_tag
ATF84284	844393	845676	+	argininosuccinate_lyase_2	CO712_03905
CO712_03910	845686	846855	+	MFS_transporter	no_locus_tag
ATF84285	847059	847589	-	gamma_carbonic_anhydrase_family_protein	CO712_03915
ATF84286	847597	849213	-	hypothetical_protein	CO712_03920
CO712_03925	849563	849757	+	glutathione_S-transferase	no_locus_tag
ATF84287	849764	850408	-	hypothetical_protein	CO712_03930
CO712_03935	850577	850921	-	1,3-1,4-beta-glycanase	no_locus_tag
ATF84288	851297	851716	+	hypothetical_protein	CO712_03940
ATF84289	851799	854645	-	TonB-dependent_receptor	CO712_03945
ATF87029	855139	856719	+	thioredoxin_family_protein	CO712_03950
ATF84290	857736	859568	+	AMP-binding_protein	CO712_03955
ATF84291	859585	860514	+	acyl-CoA_desaturase	CO712_03960
ATF84292	860546	861520	+	acyl-CoA_desaturase	CO712_03965
ATF84293	861583	861906	+	polyketide_synthase	CO712_03970
ATF84294	861928	863028	+	fatty_acid_desaturase	CO712_03975
ATF84295	863100	864074	+	delta-12-desaturase	CO712_03980
ATF84296	864090	864971	+	ferritin	CO712_03985
ATF84297	864989	865174	+	rubredoxin	CO712_03990
ATF84298	865224	866420	+	cytochrome_P450	CO712_03995
ATF84299	866657	867745	+	hemolysin_D	CO712_04000
ATF87030	867871	869385	+	EmrB/QacA_family_drug_resistance_transporter	CO712_04005
ATF84300	869397	870950	+	RND_transporter	CO712_04010
ATF84301	871056	871490	+	MarR_family_transcriptional_regulator	CO712_04015
ATF84302	871548	872162	+	TetR_family_transcriptional_regulator	CO712_04020
ATF84303	872240	873424	+	acetyl-CoA_C-acyltransferase	CO712_04025
ATF84304	873685	874683	+	D-threo-aldose_1-dehydrogenase	CO712_04030
ATF84305	874708	875136	+	MxaD_family_protein	CO712_04035
ATF84306	875487	876890	+	tetratricopeptide_repeat_protein_38_family protein	CO712_04040
ATF84307	876963	878012	-	hypothetical_protein	CO712_04045
ATF84308	878213	879409	-	cytosine_deaminase	CO712_04050
ATF84309	879489	880202	-	FadR_family_transcriptional_regulator	CO712_04055
ATF84310	880436	881218	+	Fe-S_oxidoreductase	CO712_04060
ATF84311	881215	882648	+	4Fe-4S_ferredoxin	CO712_04065
ATF84312	882645	883346	+	hypothetical_protein	CO712_04070
CO712_04075	883371	884478	-	hypothetical_protein	no_locus_tag
ATF84313	884904	885176	-	hypothetical_protein	CO712_04080
ATF84314	885173	886555	-	hemolysin	CO712_04085
ATF84315	886871	894487	-	hemagglutinin	CO712_04090
Table of Blast hits (query gene, subject gene, %identity, blast score, %coverage, e-value):
AXA93800.1	ATF84290	47	510	95.2998	7e-144
AXA94869.1	ATF84291	57	321	91.6667	2e-87
AXA94869.1	ATF84292	44	221	81.6667	4e-57
AXA93801.1	ATF84292	58	385	96.6258	2e-106
AXA93801.1	ATF84291	42	244	95.3988	4e-64
AXA93802.1	ATF84293	59	112	88.0734	3e-25
AXA93803.1	ATF84294	57	431	98.3607	2e-120
AXA93804.1	ATF84295	45	209	84.3949	9e-54
AXA93805.1	ATF84297	57	82	100	5e-16
AXA93807.1	ATF84303	42	283	99.7455	6e-76
>>
24. CP033430
Source: Burkholderia gladioli strain Co14 chromosome 1, complete sequence.
Number of proteins with BLAST hits to this cluster: 9
MultiGeneBlast score: 9.5
Cumulative Blast bit score: 2790
Table of genes, locations, strands and annotations of subject cluster:
AYQ88342	2842008	2842514	-	dihydrofolate_reductase	EDD84_13825
AYQ88343	2842799	2850472	+	filamentous_hemagglutinin_N-terminal domain-containing protein	EDD84_13830
EDD84_13835	2851144	2851970	+	ShlB/FhaC/HecB_family_hemolysin	no_locus_tag
AYQ88344	2851995	2852696	-	hypothetical_protein	EDD84_13840
AYQ88345	2852693	2854126	-	lactate_utilization_protein	EDD84_13845
AYQ88346	2854123	2854905	-	(Fe-S)-binding_protein	EDD84_13850
AYQ88347	2855138	2855851	+	FadR_family_transcriptional_regulator	EDD84_13855
AYQ88348	2855929	2857125	+	cytosine_deaminase	EDD84_13860
AYQ88349	2857218	2858375	+	hypothetical_protein	EDD84_13865
AYQ88350	2858448	2859851	-	tetratricopeptide_repeat_protein	EDD84_13870
AYQ88351	2860201	2860629	-	SRPBCC_family_protein	EDD84_13875
AYQ88352	2860653	2861651	-	aldo/keto_reductase	EDD84_13880
AYQ89613	2861913	2863097	-	acetyl-CoA_C-acyltransferase	EDD84_13885
AYQ88353	2863175	2863789	-	TetR/AcrR_family_transcriptional_regulator	EDD84_13890
AYQ88354	2863847	2864281	-	MarR_family_transcriptional_regulator	EDD84_13895
AYQ88355	2864387	2865943	-	efflux_transporter_outer_membrane_subunit	EDD84_13900
AYQ89614	2865955	2867469	-	DHA2_family_efflux_MFS_transporter_permease subunit	EDD84_13905
AYQ88356	2867595	2868683	-	HlyD_family_secretion_protein	EDD84_13910
AYQ88357	2868922	2870118	-	cytochrome_P450	EDD84_13915
AYQ88358	2870168	2870353	-	rubredoxin	EDD84_13920
AYQ88359	2870371	2871249	-	ferritin-like_domain-containing_protein	EDD84_13925
AYQ88360	2871265	2872149	-	alpha/beta_fold_hydrolase	EDD84_13930
AYQ88361	2872298	2873398	-	fatty_acid_desaturase	EDD84_13935
AYQ88362	2873420	2873743	-	polyketide_synthase	EDD84_13940
AYQ88363	2873806	2874780	-	acyl-CoA_desaturase	EDD84_13945
AYQ88364	2874806	2875735	-	acyl-CoA_desaturase	EDD84_13950
AYQ88365	2875752	2877584	-	fatty_acyl-AMP_ligase	EDD84_13955
AYQ88366	2878601	2880181	-	thioredoxin_family_protein	EDD84_13960
AYQ88367	2880675	2883515	+	TonB-dependent_receptor	EDD84_13965
AYQ88368	2884127	2886451	+	hypothetical_protein	EDD84_13970
AYQ88369	2886536	2887267	+	carboxypeptidase_regulatory-like domain-containing protein	EDD84_13975
AYQ88370	2887894	2888952	+	UDP-phosphate_galactose_phosphotransferase	EDD84_13980
AYQ88371	2888971	2889372	-	hypothetical_protein	EDD84_13985
AYQ88372	2889646	2890836	+	sugar_transporter	EDD84_13990
AYQ88373	2890836	2891303	+	protein-tyrosine-phosphatase	EDD84_13995
AYQ88374	2891290	2893515	+	sugar_transporter	EDD84_14000
AYQ89615	2893602	2894777	+	glycosyltransferase_family_4_protein	EDD84_14005
AYQ88375	2894812	2896107	-	glycosyltransferase	EDD84_14010
AYQ88376	2896599	2897708	+	glycosyltransferase_family_1_protein	EDD84_14015
Table of Blast hits (query gene, subject gene, %identity, blast score, %coverage, e-value):
AXA93800.1	AYQ88365	47	509	95.2998	2e-143
AXA94869.1	AYQ88364	57	316	91.6667	9e-86
AXA94869.1	AYQ88363	44	221	81.6667	4e-57
AXA93801.1	AYQ88363	58	385	96.6258	2e-106
AXA93801.1	AYQ88364	42	240	95.3988	5e-63
AXA93802.1	AYQ88362	59	112	88.0734	3e-25
AXA93803.1	AYQ88361	57	433	98.3607	7e-121
AXA93804.1	AYQ88360	45	209	84.3949	1e-53
AXA93805.1	AYQ88358	57	82	100	5e-16
AXA93807.1	AYQ89613	42	283	99.7455	9e-76
>>
25. CP009323
Source: Burkholderia gladioli strain ATCC 10248 chromosome 1, complete sequence.
Number of proteins with BLAST hits to this cluster: 9
MultiGeneBlast score: 9.5
Cumulative Blast bit score: 2779
Table of genes, locations, strands and annotations of subject cluster:
AJX00498	3628707	3629549	+	amidohydrolase_family_protein	BM43_3331
AJW98023	3629736	3631073	+	hypothetical_protein	BM43_3332
AJW98923	3631107	3631883	+	short_chain_dehydrogenase_family_protein	BM43_3333
AJW97964	3631932	3632270	+	hypothetical_protein	BM43_3334
AJW99763	3632342	3633583	+	H+_symporter_permease	fucP
AJX01000	3633770	3634519	+	bacterial_regulatory_s,_gntR_family_protein	BM43_3336
AJW97464	3634543	3634803	-	hypothetical_protein	BM43_3337
AJX00379	3634800	3635306	-	dihydrofolate_reductase_family_protein	BM43_3338
AJX00699	3635625	3636179	+	hypothetical_protein	BM43_3339
AJW98118	3636321	3636962	-	hypothetical_protein	BM43_3340
AJW97545	3636965	3638398	-	4Fe-4S_binding_domain_protein	BM43_3341
AJW99014	3638395	3639177	-	cysteine-rich_domain_protein	BM43_3342
AJW97911	3639411	3640124	+	bacterial_regulatory_s,_gntR_family_protein	BM43_3343
AJW97938	3640204	3641400	+	amidohydrolase_family_protein	BM43_3344
AJW99441	3641601	3642650	+	leucine_Rich_repeat_family_protein	BM43_3345
AJW99259	3642740	3644143	-	hypothetical_protein	BM43_3346
AJX00897	3644503	3644931	-	polyketide_cyclase_/_dehydrase_and_lipid transport family protein	BM43_3347
AJW97882	3644954	3645952	-	aldo/keto_reductase_family_protein	BM43_3348
AJW97449	3646214	3647398	-	acetyl-CoA_C-acetyltransferase_family_protein	BM43_3349
AJW99143	3647476	3648090	-	bacterial_regulatory_s,_tetR_family_protein	BM43_3350
AJW97159	3648148	3648582	-	marR_family_protein	BM43_3351
AJW99454	3648688	3650166	-	efflux_transporter,_outer_membrane_factor_(OMF) lipo, NodT family protein	BM43_3352
AJX00676	3650253	3651893	-	drug_resistance_MFS_transporter,_drug:H+ antiporter-2 family protein	BM43_3353
AJW98148	3651893	3652981	-	efflux_transporter,_RND_family,_MFP_subunit	BM43_3354
AJW99831	3653218	3654414	-	cytochrome_P450_family_protein	BM43_3355
AJW99959	3654464	3654649	-	rubredoxin-2	rubA2
AJW97120	3654667	3655545	-	hypothetical_protein	BM43_3357
AJX00443	3655561	3656535	-	alpha/beta_hydrolase_fold_family_protein	BM43_3358
AJW98724	3656607	3657707	-	fatty_acid_desaturase_family_protein	BM43_3359
AJX00217	3657729	3658052	-	phosphopantetheine_attachment_site_family protein	BM43_3360
AJW97494	3658115	3659089	-	fatty_acid_desaturase_family_protein	BM43_3361
AJW99328	3659115	3660074	-	fatty_acid_desaturase_family_protein	BM43_3362
AJW99818	3660061	3661893	-	AMP-binding_enzyme_family_protein	BM43_3363
AJX00929	3662910	3664490	-	thioredoxin_family_protein	BM43_3364
AJW98965	3664984	3667824	+	tonB_dependent_receptor_family_protein	BM43_3365
AJW98513	3667907	3669079	-	lactonase,_7-bladed_beta-propeller_family protein	BM43_3366
AJW97560	3669678	3672002	+	hypothetical_protein	BM43_3367
AJW99344	3672087	3672818	+	hypothetical_protein	BM43_3368
AJW97210	3673872	3674501	+	bacterial_sugar_transferase_family_protein	BM43_3369
AJX00626	3674520	3674927	-	hypothetical_protein	BM43_3370
AJW98169	3675201	3676391	+	polysaccharide_biosynthesis/export_family protein	BM43_3371
AJW97333	3676391	3676858	+	low_molecular_weight_phosphotyrosine_phosphatase family protein	BM43_3372
AJW97192	3676845	3679070	+	exopolysaccharide_transport_family_protein	BM43_3373
AJX00234	3679220	3680344	+	glycosyl_transferases_group_1_family_protein	BM43_3374
AJW99636	3680379	3681674	-	glycosyl_transferases_group_1_family_protein	BM43_3375
Table of Blast hits (query gene, subject gene, %identity, blast score, %coverage, e-value):
AXA93800.1	AJW99818	47	511	95.2998	4e-144
AXA94869.1	AJW99328	57	313	91.6667	5e-85
AXA94869.1	AJW97494	44	221	81.6667	3e-57
AXA93801.1	AJW97494	58	381	96.6258	2e-105
AXA93801.1	AJW99328	43	238	95.3988	3e-62
AXA93802.1	AJX00217	59	112	88.0734	3e-25
AXA93803.1	AJW98724	57	431	98.3607	2e-120
AXA93804.1	AJX00443	44	206	84.3949	8e-53
AXA93805.1	AJW99959	57	82	100	5e-16
AXA93807.1	AJW97449	42	284	99.7455	4e-76
>>
26. CP022213
Source: Burkholderia gladioli pv. gladioli strain FDAARGOS_188 chromosome 1, complete sequence.
Number of proteins with BLAST hits to this cluster: 9
MultiGeneBlast score: 9.5
Cumulative Blast bit score: 2778
Table of genes, locations, strands and annotations of subject cluster:
AWY55449	3075196	3076491	+	hypothetical_protein	A8H28_31150
AWY55450	3076526	3077689	-	glycosyl_transferase_family_1	A8H28_31155
AWY55451	3077800	3080025	-	sugar_transporter	A8H28_31160
AWY55452	3080012	3080479	-	protein-tyrosine-phosphatase	A8H28_31165
AWY55453	3080479	3081669	-	sugar_transporter	A8H28_31170
AWY55454	3081943	3082350	+	hypothetical_protein	A8H28_31175
AWY55455	3082369	3083427	-	UDP-phosphate_galactose_phosphotransferase	A8H28_31180
AWY55456	3084052	3084783	-	hypothetical_protein	A8H28_31185
AWY55457	3084868	3087192	-	hypothetical_protein	A8H28_31190
AWY55458	3087881	3088963	+	hypothetical_protein	A8H28_31195
AWY55459	3089046	3091886	-	TonB-dependent_receptor	A8H28_31200
AWY56960	3092380	3093960	+	thioredoxin_family_protein	A8H28_31205
AWY55460	3094977	3096809	+	AMP-binding_protein	A8H28_31210
AWY56961	3096826	3097755	+	acyl-CoA_desaturase	A8H28_31215
AWY55461	3097781	3098755	+	acyl-CoA_desaturase	A8H28_31220
AWY55462	3098818	3099141	+	polyketide_synthase	A8H28_31225
AWY55463	3099163	3100263	+	fatty_acid_desaturase	A8H28_31230
AWY55464	3100335	3101309	+	alpha/beta_hydrolase	A8H28_31235
AWY55465	3101325	3102203	+	ferritin	A8H28_31240
AWY55466	3102221	3102406	+	rubredoxin	A8H28_31245
AWY55467	3102456	3103652	+	cytochrome_P450	A8H28_31250
AWY55468	3103889	3104977	+	HlyD_family_secretion_protein	A8H28_31255
AWY56962	3105103	3106617	+	MFS_transporter	A8H28_31260
A8H28_31265	3106629	3108181	+	RND_transporter	no_locus_tag
AWY55469	3108287	3108721	+	MarR_family_transcriptional_regulator	A8H28_31270
AWY55470	3108779	3109393	+	TetR/AcrR_family_transcriptional_regulator	A8H28_31275
AWY55471	3109471	3110655	+	acetyl-CoA_acetyltransferase	A8H28_31280
AWY55472	3110917	3111915	+	aldo/keto_reductase	A8H28_31285
AWY55473	3111938	3112366	+	SRPBCC_family_protein	A8H28_31290
AWY55474	3112726	3114129	+	tetratricopeptide_repeat_protein_38_family protein	A8H28_31295
AWY55475	3114219	3115268	-	hypothetical_protein	A8H28_31300
AWY55476	3115469	3116665	-	cytosine_deaminase	A8H28_31305
AWY55477	3116745	3117458	-	FadR_family_transcriptional_regulator	A8H28_31310
AWY55478	3117692	3118474	+	Fe-S_oxidoreductase	A8H28_31315
AWY55479	3118471	3119904	+	lactate_utilization_protein	A8H28_31320
AWY55480	3119901	3120548	+	hypothetical_protein	A8H28_31325
AWY55481	3120690	3121244	-	hypothetical_protein	A8H28_31330
AWY55482	3121563	3122069	+	dihydrofolate_reductase	A8H28_31335
AWY55483	3122066	3122326	+	hypothetical_protein	A8H28_31340
AWY55484	3122350	3123099	-	FadR_family_transcriptional_regulator	A8H28_31345
AWY55485	3123286	3124527	-	L-fucose:H+_symporter_permease	fucP
AWY55486	3124599	3124937	-	L-rhamnose_mutarotase	A8H28_31355
AWY55487	3124986	3125762	-	short-chain_dehydrogenase	A8H28_31360
AWY55488	3125796	3127133	-	L-fuconate_dehydratase	A8H28_31365
AWY55489	3127320	3128162	-	amidohydrolase	A8H28_31370
AWY55490	3128871	3131012	+	peptidase_M1	A8H28_31375
Table of Blast hits (query gene, subject gene, %identity, blast score, %coverage, e-value):
AXA93800.1	AWY55460	47	511	95.2998	4e-144
AXA94869.1	AWY56961	57	312	91.6667	8e-85
AXA94869.1	AWY55461	44	221	81.6667	3e-57
AXA93801.1	AWY55461	58	381	96.6258	2e-105
AXA93801.1	AWY56961	43	238	95.3988	2e-62
AXA93802.1	AWY55462	59	112	88.0734	3e-25
AXA93803.1	AWY55463	57	431	98.3607	2e-120
AXA93804.1	AWY55464	44	206	84.3949	8e-53
AXA93805.1	AWY55466	57	82	100	5e-16
AXA93807.1	AWY55471	42	284	99.7455	4e-76
>>
27. CP022005
Source: Burkholderia gladioli pv. gladioli strain KACC 11889 chromosome 1, complete sequence.
Number of proteins with BLAST hits to this cluster: 9
MultiGeneBlast score: 9.5
Cumulative Blast bit score: 2778
Table of genes, locations, strands and annotations of subject cluster:
ASD79272	2119130	2119972	+	amidohydrolase	CEJ98_09790
ASD79273	2120159	2121496	+	L-fuconate_dehydratase	CEJ98_09795
ASD79274	2121530	2122306	+	short-chain_dehydrogenase	CEJ98_09800
ASD79275	2122355	2122693	+	L-rhamnose_mutarotase	CEJ98_09805
ASD79276	2122765	2124006	+	L-fucose:H+_symporter_permease	fucP
ASD79277	2124193	2124942	+	FadR_family_transcriptional_regulator	CEJ98_09815
ASD79278	2124966	2125226	-	hypothetical_protein	CEJ98_09820
ASD79279	2125223	2125729	-	dihydrofolate_reductase	CEJ98_09825
ASD79280	2126048	2126602	+	hypothetical_protein	CEJ98_09830
ASD79281	2126744	2127391	-	hypothetical_protein	CEJ98_09835
ASD79282	2127388	2128821	-	lactate_utilization_protein	CEJ98_09840
ASD79283	2128818	2129600	-	Fe-S_oxidoreductase	CEJ98_09845
ASD79284	2129834	2130547	+	FadR_family_transcriptional_regulator	CEJ98_09850
ASD79285	2130627	2131823	+	cytosine_deaminase	CEJ98_09855
ASD79286	2132024	2133073	+	hypothetical_protein	CEJ98_09860
ASD79287	2133163	2134566	-	tetratricopeptide_repeat_protein_38_family protein	CEJ98_09865
ASD79288	2134926	2135354	-	SRPBCC_family_protein	CEJ98_09870
ASD79289	2135377	2136375	-	aldo/keto_reductase	CEJ98_09875
ASD79290	2136637	2137821	-	acetyl-CoA_acetyltransferase	CEJ98_09880
ASD79291	2137899	2138513	-	TetR/AcrR_family_transcriptional_regulator	CEJ98_09885
ASD79292	2138571	2139005	-	MarR_family_transcriptional_regulator	CEJ98_09890
ASD79293	2139111	2140664	-	RND_transporter	CEJ98_09895
ASD81359	2140676	2142190	-	MFS_transporter	CEJ98_09900
ASD79294	2142316	2143404	-	HlyD_family_secretion_protein	CEJ98_09905
ASD79295	2143641	2144837	-	cytochrome_P450	CEJ98_09910
ASD79296	2144887	2145072	-	rubredoxin	CEJ98_09915
ASD79297	2145090	2145968	-	ferritin	CEJ98_09920
ASD79298	2145984	2146958	-	alpha/beta_hydrolase	CEJ98_09925
ASD79299	2147030	2148130	-	fatty_acid_desaturase	CEJ98_09930
ASD79300	2148152	2148475	-	polyketide_synthase	CEJ98_09935
ASD79301	2148538	2149512	-	acyl-CoA_desaturase	CEJ98_09940
ASD81360	2149538	2150467	-	acyl-CoA_desaturase	CEJ98_09945
ASD79302	2150484	2152316	-	AMP-binding_protein	CEJ98_09950
ASD81361	2153333	2154913	-	thioredoxin_family_protein	CEJ98_09955
ASD79303	2155407	2158247	+	TonB-dependent_receptor	CEJ98_09960
ASD79304	2158330	2159412	-	hypothetical_protein	CEJ98_09965
ASD79305	2160101	2162425	+	hypothetical_protein	CEJ98_09970
ASD79306	2162510	2163241	+	hypothetical_protein	CEJ98_09975
ASD79307	2163866	2164924	+	UDP-phosphate_galactose_phosphotransferase	CEJ98_09980
ASD79308	2164943	2165350	-	hypothetical_protein	CEJ98_09985
ASD79309	2165624	2166814	+	sugar_transporter	CEJ98_09990
ASD79310	2166814	2167281	+	protein-tyrosine-phosphatase	CEJ98_09995
ASD79311	2167268	2169493	+	sugar_transporter	CEJ98_10000
ASD81362	2169604	2170767	+	glycosyl_transferase_family_1	CEJ98_10005
ASD79312	2170802	2172097	-	hypothetical_protein	CEJ98_10010
ASD79313	2172289	2172516	-	hypothetical_protein	CEJ98_10015
Table of Blast hits (query gene, subject gene, %identity, blast score, %coverage, e-value):
AXA93800.1	ASD79302	47	511	95.2998	4e-144
AXA94869.1	ASD81360	57	312	91.6667	8e-85
AXA94869.1	ASD79301	44	221	81.6667	3e-57
AXA93801.1	ASD79301	58	381	96.6258	2e-105
AXA93801.1	ASD81360	43	238	95.3988	2e-62
AXA93802.1	ASD79300	59	112	88.0734	3e-25
AXA93803.1	ASD79299	57	431	98.3607	2e-120
AXA93804.1	ASD79298	44	206	84.3949	8e-53
AXA93805.1	ASD79296	57	82	100	5e-16
AXA93807.1	ASD79290	42	284	99.7455	4e-76
>>
28. CP002599
Source: Burkholderia gladioli BSR3 chromosome 1, complete sequence.
Number of proteins with BLAST hits to this cluster: 9
MultiGeneBlast score: 9.5
Cumulative Blast bit score: 2774
Table of genes, locations, strands and annotations of subject cluster:
AEA60628	2239240	2240082	+	amidohydrolase_2	bgla_1g19890
AEA60629	2240269	2241606	+	Mandelate_racemase/muconate_lactonizing enzyme-like protein	bgla_1g19900
AEA60630	2241640	2242416	+	Short_chain_dehydrogenase	bgla_1g19910
AEA60631	2242465	2242803	+	hypothetical_protein	bgla_1g19920
AEA60632	2242875	2244116	+	L-fucose_transporter	bgla_1g19930
AEA60633	2244303	2245052	+	GntR_domain_protein	bgla_1g19940
AEA60634	2245076	2245336	-	hypothetical_protein	bgla_1g19950
AEA60635	2245333	2245839	-	dihydrofolate_reductase	bgla_1g19960
AEA60636	2246110	2246328	+	Filamentous_hemagglutinin	bgla_1g19970
AEA60637	2246354	2247223	-	integrase_catalytic_subunit	bgla_1g19980
AEA60638	2247205	2247483	-	transposase_IS3/IS911	bgla_1g19990
AEA60639	2247972	2248427	+	chaperone_ClpB	bgla_1g20000
AEA60640	2248452	2249153	-	hypothetical_protein	bgla_1g20010
AEA60641	2249150	2250583	-	4Fe-4S_ferredoxin,_iron-sulfur_binding_protein	bgla_1g20020
AEA60642	2250580	2251362	-	hypothetical_protein	bgla_1g20030
AEA60643	2251595	2252308	+	GntR-like_protein	bgla_1g20040
AEA60644	2252388	2253584	+	N-isopropylammelide_isopropylaminohydrolase	bgla_1g20050
AEA60645	2253785	2254834	+	GALA_protein_1	bgla_1g20060
AEA60646	2254904	2256307	-	hypothetical_protein	bgla_1g20070
AEA60647	2256658	2257086	-	hypothetical_protein	bgla_1g20080
AEA60648	2257110	2258108	-	aldo/keto_reductase	bgla_1g20090
AEA60649	2258370	2259554	-	acetyl-CoA_acetyltransferase	bgla_1g20100
AEA60650	2259632	2260246	-	transcriptional_regulator,_TetR_family	bgla_1g20110
AEA60651	2260304	2260738	-	MarR_family_regulatory_protein	bgla_1g20120
AEA60652	2260844	2262397	-	RND_efflux_system,_outer_membrane_lipoprotein, NodT	bgla_1g20130
AEA60653	2262409	2264049	-	transporter	bgla_1g20140
AEA60654	2264049	2265137	-	secretion_protein_HlyD	bgla_1g20150
AEA60655	2265374	2266570	-	cytochrome_P450	bgla_1g20160
AEA60656	2266620	2266805	-	rubredoxin	bgla_1g20170
AEA60657	2266823	2267695	-	hypothetical_protein	bgla_1g20180
AEA60658	2267711	2268685	-	delta_12_desaturase	bgla_1g20190
AEA60659	2268744	2269844	-	Fatty_acid_desaturase	bgla_1g20200
AEA60660	2269866	2270189	-	polyketide_synthase	bgla_1g20210
AEA60661	2270252	2271226	-	fatty_acid_desaturase_family_protein	bgla_1g20220
AEA60662	2271252	2272181	-	fatty_acid_desaturase_family_protein	bgla_1g20230
AEA60663	2272198	2274030	-	pyoverdine_synthetase	bgla_1g20240
AEA60664	2275047	2276627	-	thioredoxin_domain_protein	bgla_1g20250
AEA60665	2277121	2279961	+	TonB-dependent_receptor	bgla_1g20260
AEA60666	2280569	2282893	+	hypothetical_protein	bgla_1g20270
AEA60667	2282978	2283709	+	hypothetical_protein	bgla_1g20280
AEA60668	2284335	2285393	+	exopolysaccharide_biosynthesis_polyprenyl glycosylphosphotransferase	bgla_1g20290
AEA60669	2286084	2287274	+	polysaccharide_export_protein	bgla_1g20300
AEA60670	2287274	2287741	+	protein_tyrosine_phosphatase	bgla_1g20310
AEA60671	2287728	2289953	+	exopolysaccharide_transport_protein_family	bgla_1g20320
AEA60672	2289986	2291206	+	glycosyl_transferase_group_1	bgla_1g20330
AEA60673	2291241	2292536	-	hypothetical_protein	bgla_1g20340
AEA60674	2293028	2294137	+	glycosyl_transferase_group_1	bgla_1g20350
Table of Blast hits (query gene, subject gene, %identity, blast score, %coverage, e-value):
AXA93800.1	AEA60663	47	507	94.6515	5e-143
AXA94869.1	AEA60662	57	311	91.6667	3e-84
AXA94869.1	AEA60661	44	221	81.6667	4e-57
AXA93801.1	AEA60661	58	385	96.6258	2e-106
AXA93801.1	AEA60662	43	238	95.3988	2e-62
AXA93802.1	AEA60660	59	112	88.0734	3e-25
AXA93803.1	AEA60659	57	432	98.3607	1e-120
AXA93804.1	AEA60658	44	206	84.3949	8e-53
AXA93805.1	AEA60656	57	82	100	5e-16
AXA93807.1	AEA60649	41	280	99.7455	1e-74
>>
29. CP021744
Source: Streptomyces albireticuli strain MDJK11 chromosome, complete genome.
Number of proteins with BLAST hits to this cluster: 9
MultiGeneBlast score: 9.0
Cumulative Blast bit score: 2579
Table of genes, locations, strands and annotations of subject cluster:
ARZ66596	1065069	1066202	+	peptidase_M20	SMD11_0930
ARZ66597	1066268	1067275	-	iron-siderophore_ABC_transporter substrate-binding protein	SMD11_0931
ARZ66598	1067459	1068256	+	iron-dicitrate_transporter_ATP-binding_subunit	SMD11_0932
ARZ66599	1068318	1068884	+	TetR_family_transcriptional_regulator	SMD11_0933
ARZ66600	1068912	1069592	-	hypothetical_protein	SMD11_0934
ARZ66601	1069544	1070119	-	hypothetical_protein	SMD11_0935
ARZ66602	1070404	1071228	+	hypothetical_protein	SMD11_0936
ARZ66603	1071281	1072378	-	membrane_protein	SMD11_0937
ARZ66604	1072571	1072660	-	hypothetical_protein	SMD11_0938
ARZ66605	1073010	1073996	-	hypothetical_protein	SMD11_0939
ARZ66606	1073993	1074943	-	ABC_transporter_ATP-binding_protein	SMD11_0940
ARZ66607	1075110	1076516	-	major_facilitator_transporter	SMD11_0941
ARZ66608	1076603	1077829	-	hydroxylase	SMD11_0942
ARZ66609	1077897	1078049	-	rubredoxin	SMD11_0943
ARZ66610	1078076	1078957	-	delta-12-desaturase	SMD11_0944
ARZ66611	1078957	1080057	-	fatty_acid_desaturase	SMD11_0945
ARZ66612	1080072	1080368	-	polyketide_synthase	SMD11_0946
ARZ66613	1080449	1081303	-	fatty_acid_desaturase	SMD11_0947
ARZ66614	1081413	1082414	-	fatty_acid_desaturase	SMD11_0948
ARZ66615	1082427	1084172	-	AMP-dependent_synthetase	SMD11_0949
ARZ66616	1084312	1085034	-	hypothetical_protein	SMD11_0950
ARZ66617	1085106	1085222	-	hypothetical_protein	SMD11_0951
ARZ66618	1085755	1086678	+	3-oxoacyl-ACP_synthase	fabH
ARZ66619	1086863	1087603	+	hypothetical_protein	SMD11_0953
ARZ66620	1087861	1088739	+	ABC_transporter_substrate-binding_protein	metQ
ARZ66621	1088745	1089767	+	ABC_transporter	metN
ARZ66622	1089764	1090426	+	methionine_ABC_transporter_permease	metI
ARZ66623	1090423	1090608	+	hypothetical_protein	SMD11_0957
ARZ66624	1090605	1091084	+	hypothetical_protein	SMD11_0958
ARZ66625	1091382	1092011	+	hypothetical_protein	SMD11_0959
ARZ66626	1092008	1092826	+	VTC_domain-containing_protein	SMD11_0960
ARZ66627	1092881	1093036	-	hypothetical_protein	SMD11_0961
ARZ66628	1093260	1094375	+	carboxylate-amine_ligase	ybdK
ARZ66629	1094524	1096479	+	hypothetical_protein	SMD11_0963
ARZ66630	1096708	1099023	+	carbonate_dehydratase	copA
ARZ66631	1099097	1099390	-	hypothetical_protein	SMD11_0965
ARZ66632	1100036	1101160	+	hypothetical_protein	SMD11_0967
ARZ66633	1101209	1106302	-	DNA_repair_ATPase	SMD11_0968
Table of Blast hits (query gene, subject gene, %identity, blast score, %coverage, e-value):
AXA93800.1	ARZ66615	52	561	93.6791	4e-159
AXA94869.1	ARZ66614	59	303	96.6667	8e-82
AXA94869.1	ARZ66613	38	207	88.3333	4e-53
AXA93801.1	ARZ66613	66	402	87.1166	1e-111
AXA93801.1	ARZ66614	37	162	95.7055	2e-39
AXA93802.1	ARZ66612	60	114	88.0734	9e-26
AXA93803.1	ARZ66611	63	509	98.9071	7e-144
AXA93804.1	ARZ66610	50	249	86.9427	1e-65
AXA93805.1	ARZ66609	60	72	81.9672	4e-13
>>
30. CP054918
Source: Streptomyces sp. NA04227 chromosome, complete genome.
Number of proteins with BLAST hits to this cluster: 9
MultiGeneBlast score: 9.0
Cumulative Blast bit score: 2555
Table of genes, locations, strands and annotations of subject cluster:
QKW10744	2224981	2225649	-	response_regulator_transcription_factor	HUT18_09220
QKW06556	2225715	2226353	-	TetR/AcrR_family_transcriptional_regulator	HUT18_09225
QKW06557	2226525	2227415	+	metal-dependent_hydrolase	HUT18_09230
QKW06558	2227453	2228565	+	oxidoreductase	HUT18_09235
QKW06559	2228645	2229514	+	aminopeptidase_P_family_protein	HUT18_09240
QKW10745	2229620	2231434	+	SDR_family_oxidoreductase	HUT18_09245
QKW06560	2231563	2232204	-	histidine_phosphatase_family_protein	HUT18_09250
QKW06561	2232502	2233584	+	MBL_fold_metallo-hydrolase	HUT18_09255
QKW06562	2233749	2234318	-	SMI1/KNR4_family_protein	HUT18_09260
QKW06563	2235250	2236290	+	UbiA_family_prenyltransferase	HUT18_09265
QKW06564	2236336	2237205	-	hypothetical_protein	HUT18_09270
QKW10746	2237306	2237830	-	hypothetical_protein	HUT18_09275
QKW10747	2238447	2239280	-	helix-turn-helix_domain-containing_protein	HUT18_09280
QKW06565	2239277	2239786	-	hypothetical_protein	HUT18_09285
QKW10748	2239773	2239976	-	hypothetical_protein	HUT18_09290
QKW06566	2240191	2240283	-	DUF397_domain-containing_protein	HUT18_09295
QKW06567	2240474	2241319	-	hypothetical_protein	HUT18_09300
QKW06568	2241720	2242538	-	class_I_SAM-dependent_methyltransferase	HUT18_09305
QKW06569	2242730	2243074	+	hypothetical_protein	HUT18_09310
QKW06570	2243333	2243515	-	rubredoxin	HUT18_09315
QKW06571	2243512	2244378	-	alpha/beta_hydrolase	HUT18_09320
QKW06572	2244375	2245520	-	fatty_acid_desaturase	HUT18_09325
QKW06573	2245593	2245877	-	acyl_carrier_protein	HUT18_09330
QKW06574	2245992	2246975	-	acyl-CoA_desaturase	HUT18_09335
QKW06575	2246972	2247919	-	acyl-CoA_desaturase	HUT18_09340
QKW06576	2247916	2249685	-	fatty_acyl-AMP_ligase	HUT18_09345
QKW06577	2249904	2250707	-	thioesterase_family_protein	HUT18_09350
QKW06578	2251545	2252300	-	sulfite_exporter_TauE/SafE_family_protein	HUT18_09355
QKW06579	2252592	2253503	+	LysR_family_transcriptional_regulator	HUT18_09360
QKW06580	2253544	2254008	-	helix-turn-helix_transcriptional_regulator	HUT18_09365
QKW06581	2254178	2255341	-	thiolase_family_protein	HUT18_09370
QKW10749	2256034	2257230	+	cytochrome_P450	HUT18_09375
QKW06582	2257454	2258350	+	alpha/beta_hydrolase	HUT18_09380
QKW06583	2258576	2260036	-	DHA2_family_efflux_MFS_transporter_permease subunit	HUT18_09385
QKW06584	2260427	2262346	-	long-chain_fatty_acid--CoA_ligase	HUT18_09390
QKW06585	2262718	2263419	-	TetR/AcrR_family_transcriptional_regulator	HUT18_09395
QKW06586	2263568	2264029	+	SCP2_sterol-binding_domain-containing_protein	HUT18_09400
QKW06587	2264034	2265245	+	acyl-CoA_dehydrogenase_family_protein	HUT18_09405
QKW10750	2265414	2265770	-	PRC-barrel_domain-containing_protein	HUT18_09410
QKW06588	2266261	2268063	-	von_Willebrand_factor_type_A_domain-containing protein	HUT18_09415
QKW06589	2268360	2269214	-	ABC_transporter_permease_subunit	HUT18_09420
QKW06590	2269294	2271990	-	alpha/beta_fold_hydrolase	HUT18_09425
Table of Blast hits (query gene, subject gene, %identity, blast score, %coverage, e-value):
AXA93800.1	QKW06576	48	529	92.8687	2e-149
[truncated: 1,618 more rows]
